# Supplementary material
Source: PubMed Central journal article supplement (PMC4401995)

## Supporting Information

### Palladium-Catalyzed, Ring-Forming Aromatic C-H Alkylations with Unactivated Alkyl Halides

Alexander R. O. Venning, Patrick T. Bohan, and Erik J. Alexanian\*

*Department of Chemistry, University of North Carolina at Chapel Hill, Chapel Hill, NC 27599, United States*

eja@email.unc.edu

#### Table of Contents

|                                                     |                   |
|-----------------------------------------------------|-------------------|
| <b>General Methods</b>                              | <b>S1 - S2</b>    |
| <b>Substrate Preparation</b>                        | <b>S2 - S37</b>   |
| <b>Palladium-Catalyzed Reactions</b>                | <b>S38 - S51</b>  |
| <b>Stereochemical Experiments</b>                   | <b>S52 - S54</b>  |
| <b>Proposed Rearrangement Mechanism</b>             | <b>S55</b>        |
| <b>References</b>                                   | <b>S56</b>        |
| <b><sup>1</sup>H and <sup>13</sup>C NMR Spectra</b> | <b>S57 - S109</b> |

#### General Methods

Proton and carbon magnetic resonance spectra (<sup>1</sup>H NMR and <sup>13</sup>C NMR) were obtained using a Bruker model AVANCE III 400 or 600 (<sup>1</sup>H NMR at 400 MHz or 600 MHz and <sup>13</sup>C NMR at 100 MHz) spectrometer with solvent resonance as internal reference (<sup>1</sup>H NMR: CDCl<sub>3</sub> at 7.28 ppm, <sup>13</sup>C NMR: CDCl<sub>3</sub> at 77.00 ppm). <sup>1</sup>H NMR data are reported as follows: chemical shift (ppm), multiplicity (s = singlet, d = doublet, t = triplet, q = quartet, m = multiplet, bs = broad singlet), coupling constants (Hz), and integration. Mass spectra were obtained using a Micromass (now Waters Corporation) Quattro-II, Triple Quadrupole Mass Spectrometer, with a Z-spray nano-Electrospray source design, in combination with an Advion NanoMate chip-based electrospray sample introduction system or a Perkin Elmer Flexar SQ300 MS LC Detector.

Optical rotation measurements were obtained using a Jasco DIP-1000 Digital Polarimeter. Infrared (IR) Spectra were obtained using a Jasco 260 Plus Fourier transform infrared spectrometer. HPLC spectra were obtained using an Agilent 1200 series HPLC with detection at 210, 230, 250 and 254 nm using a Chiralpak IA & IC columns using a flow rate of 1 mL per minute. The solvent system used for HPLC resolution of enantiomers was hexanes (A1) and isopropanol (B2). Flash Chromatography was performed using SiliaFlash P60 silica gel (40-63 μm) purchased from Silicycle. Visualization was achieved using a short wave UV light (254 nm) and aqueous basic potassium permanganate solution. Tetrahydrofuran (THF), diethyl ether (Et<sub>2</sub>O), dichloromethane (DCM), toluene, acetonitrile (MeCN), and dimethylformamide (DMF) were dried by passage through a column of neutral alumina under nitrogen prior to use. Acetone, 1,4-dioxane and tert-butylbenzene were dried over 3 Å molecular sieves and degassed with argon prior to use. All other reagents were obtained from commercial sources and used without further purification unless otherwise noted.

## Substrate Preparation

### General Procedure A: Sulfonation of Anilines<sup>1</sup>.

To a 0°C solution of aniline (1 equiv) and pyridine (1.1 equiv) in CH<sub>2</sub>Cl<sub>2</sub> (0.35 M) was added methanesulfonyl chloride (1 equiv). The reaction mixture was allowed to warm to ambient temperature and was stirred at ambient temperature for 16 hours. The reaction was quenched with 3N NaOH and the aqueous layer was extracted with CH<sub>2</sub>Cl<sub>2</sub> (3x). The aqueous layer was acidified with conc. HCl and filtered through a fritted funnel. The recovered white precipitate was dried under vacuum.

### General Procedure B: Alkylation of Methanesulfonamides.<sup>2</sup>

To a solution of methanesulfonamide (1 equiv) in acetonitrile (0.15 M) was added K<sub>2</sub>CO<sub>3</sub> (3 equiv) and alkyl halide (8 equiv). The reaction mixture was heated to reflux and stirred for 20 hours before being quenched with H<sub>2</sub>O and extracted with Et<sub>2</sub>O (3x). The organic layers were combined and dried over MgSO<sub>4</sub>, filtered and concentrated. The crude product was purified by flash chromatography.

### General Procedure C. Epoxidation of Terminal Alkenes.

To a room temperature solution of alkene (1 equiv) in DCM (0.3 M) was added mCPBA (70%, 2 equiv) portionwise. The reaction mixture was stirred at room temperature for 48 hours, and was quenched with saturated NaHSO<sub>3</sub> solution. The aqueous layer was extracted with DCM (3x) and the combined organic layer was washed with saturated NaHCO<sub>3</sub> and H<sub>2</sub>O, dried over MgSO<sub>4</sub>, filtered, and concentrated. The crude product was purified by flash chromatography.

### General Procedure D: Opening of Terminal Epoxides with Super Hydride.

To a solution of epoxide (1 equiv) in THF (0.15 M) at -78°C was added Super-Hydride solution by syringe pump over 30 minutes (1M in THF, 1.2 equiv). The reaction mixture was stirred, warming to room temperature for 1 hour. The solution was quenched with saturated NH<sub>4</sub>Cl and extracted with Et<sub>2</sub>O (3x). The organic layers were dried over MgSO<sub>4</sub>, filtered, and concentrated. The crude product was purified by flash chromatography.

### General Procedure E: Iodination of Primary and Secondary Alcohols.

To a solution of triphenylphosphine (1.05 equiv) and imidazole (1.05 equiv) in toluene (0.2 M) was added iodine (1.05 M) and stirred for 30 minutes at room temperature. The alcohol (1 equiv) was then added, and the reaction mixture was heated to 80°C and stirred for 16 hours. The solution was then quenched with H<sub>2</sub>O, extracted with Et<sub>2</sub>O (3x), and washed with saturated Na<sub>2</sub>S<sub>2</sub>O<sub>3</sub>. The organic extracts were then dried over MgSO<sub>4</sub>, filtered, and concentrated. The crude product was purified by flash chromatography. As a precaution, alkyl iodide products were stored in the dark, under inert atmosphere, at -40°C upon purification.

### General Procedure F: Bromination of Primary and Secondary Alcohols.

To a solution of secondary alcohol (1 equiv) in Et<sub>2</sub>O (1.0 M) was added phosphorus tribromide (0.5 equiv) dropwise. The reaction mixture was stirred at room temperature for 1 hour, and was then quenched with H<sub>2</sub>O. The aqueous layer was back extracted with Et<sub>2</sub>O (3x) and the combined organic layers were washed with saturated NaHCO<sub>3</sub>, dried over MgSO<sub>4</sub>, filtered, and concentrated. The crude product was purified by flash chromatography

**General Procedure G: Alkylation of Triethyl Methanetricarboxylate.**

To a solution of sodium hydride (60 %, 1.02 equiv) in 1:1 DMF:Toluene (0.3 M) was added triethyl methanetricarboxylate (1 equiv). The solution was stirred for 30 minutes at room temperature before the addition of benzyl bromide (1.02 equiv). The reaction mixture was heated to reflux and stirred for 20 hours. The reaction was quenched with H<sub>2</sub>O, extracted with EtOAc (5x) and washed with H<sub>2</sub>O, sat'd NaHCO<sub>3</sub>, and brine. The organic layer was then dried over MgSO<sub>4</sub>, filtered, and concentrated.

**General Procedure H: Decarboxylation of Benzyl Triesters.**

To a solution of sodium hydride (60%, 1.1 equiv) in THF (0.4 M) was added ethanol (1.2 equiv) and stirred for 30 minutes at room temperature. Benzyl triester (1 equiv) was then added, and the solution was heated to reflux and stirred for 16 hours. The reaction mixture was quenched with 1N HCl, extracted with Et<sub>2</sub>O, and washed with H<sub>2</sub>O, sat'd NaHCO<sub>3</sub>, and brine. The organic layer was then dried over MgSO<sub>4</sub>, filtered, and concentrated. The crude product was purified by flash chromatography

**General Procedure I: Alkylation of Diethyl Benzylmalonates.**

To a solution of sodium hydride (60%, 1.3 equiv) in THF (0.3 M) was added diethyl benzylmalonate (1 equiv). The solution was stirred for 30 minutes at room temperature and 1,2-dibromoethane (10 equiv) was then added. The reaction mixture was heated to reflux, stirred for 24 hours. The reaction was quenched with H<sub>2</sub>O, extracted with Et<sub>2</sub>O (3x), washed with brine, Dried over MgSO<sub>4</sub>, filtered, and concentrated. The crude product was purified by flash chromatography.

**General Procedure J: Iodination of Primary Bromides and Chlorides.**

To a solution of primary halide (1 equiv) in acetone (0.3 M) was added NaI (3 equiv) and 15-crown-5 (10 mol %). The solution was heated to reflux and stirred for 20 hours. The reaction mixture was quenched with H<sub>2</sub>O, extracted with DCM (3x), and washed with sat'd Na<sub>2</sub>S<sub>2</sub>O<sub>3</sub> and brine. The organic layer was dried over MgSO<sub>4</sub>, filtered, and concentrated. The crude product was purified by flash chromatography. As a precaution, alkyl iodide products were stored in the dark, under inert atmosphere, at -40°C upon purification.

**General Procedure K: Iodoalkylation of Diethylbenzylmalonates.**

To a solution of sodium hydride (60%, 1.1 equiv) in THF (0.2 M) was added diethyl benzylmalonate (1 equiv). The solution was stirred for 30 minutes at room temperature before the addition of diiodomethane (2 equiv). The reaction mixture was heated to reflux and stirred for 20 hours. The reaction was quenched with H<sub>2</sub>O, extracted with Et<sub>2</sub>O, and

washed with brine. The organic layer was dried over  $\text{MgSO}_4$ , filtered, and concentrated. The crude product was purified by flash chromatography. As a precaution, alkyl iodide products were stored in the dark, under inert atmosphere, at  $-40^\circ\text{C}$  upon purification.

**General Procedure L: Epoxykylation or Alkylation of Indoles and Pyrroles.**

To a solution of indole or pyrrole (1 equiv) in DMF (0.3 M) was added KOH (1.1 equiv). The solution was stirred for 15 minutes at room temperature before the addition of alkyl halide (1.1 equiv). The reaction mixture was heated to  $80^\circ\text{C}$  and stirred for 16 hours, before being quenched with  $\text{H}_2\text{O}$ , extracted with  $\text{Et}_2\text{O}$  (3x), and washed with brine. The organic layer was dried over  $\text{MgSO}_4$ , filtered, and concentrated. The crude product was purified by flash chromatography.

**General Procedure M: Alkylation of Indoles and Pyrroles with Dihaloalkanes.**

To a solution of indole or pyrrole (1 equiv) in DMSO (0.5 M) was added KOH (1.3 equiv). The solution was sonicated for 10 minutes before the addition of alkyl bromide (3 equiv). The reaction mixture was stirred for 20 hours at room temperature, and was then quenched with  $\text{H}_2\text{O}$ , extracted with  $\text{Et}_2\text{O}$  (3x), and washed with brine. The organic layer was dried over  $\text{MgSO}_4$ , filtered, and concentrated. The crude product was purified by flash chromatography.

**General Procedure N: Iodination of Primary Alkyl Chlorides.**

To a solution of primary halide (1 equiv) in acetonitrile (0.15 M) was added NaI (4.5 equiv). The solution was heated to reflux and stirred for 16 hours. The reaction mixture was quenched with  $\text{H}_2\text{O}$ , extracted with  $\text{Et}_2\text{O}$  (3x), and washed with sat'd  $\text{Na}_2\text{S}_2\text{O}_3$  and brine. The organic layer was dried over  $\text{MgSO}_4$ , filtered, and concentrated. The crude product was purified by flash chromatography. As a precaution, alkyl iodide products were stored in the dark, under inert atmosphere, at  $-40^\circ\text{C}$  upon purification.



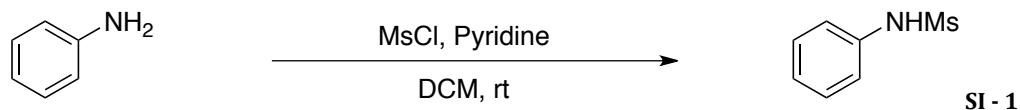

**(SI-1): N-phenylmethanesulfonamide.** Aniline (4.2 g, 45 mmol) was sulfonated with methanesulfonyl chloride (5.2 g, 45 mmol) according to General Procedure A. The crude product was isolated as a pure white solid (90% Yield). All physical and spectroscopic data were in accordance with the literature data.<sup>3</sup>

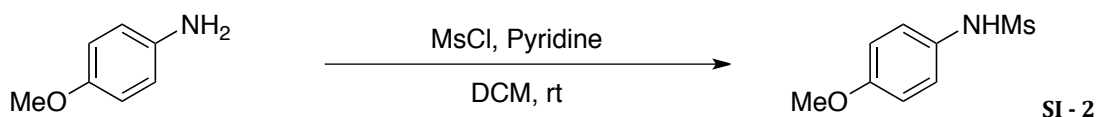

**(SI-2): N-(4-methoxyphenyl)methanesulfonamide.** p-Anisidine (5.0 g, 40.5 mmol) was sulfonated with methanesulfonyl chloride (4.6 g, 40.5 mmol) according to General Procedure A. The crude product was isolated as a pure white solid (83% Yield). All physical and spectroscopic data were in accordance with the literature data.<sup>3</sup>

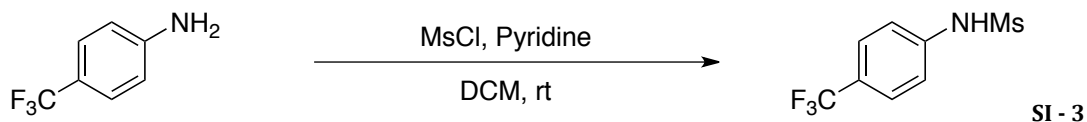

**(SI-3): N-(4-trifluoromethylphenyl)methanesulfonamide.** p-Trifluoromethylaniline (10.0 g, 62 mmol) was sulfonated with methanesulfonyl chloride (7.1 g, 62 mmol) according to General Procedure A. The crude product was isolated as a pure white solid (82% Yield). All physical and spectroscopic data were in accordance with the literature data.<sup>4</sup>

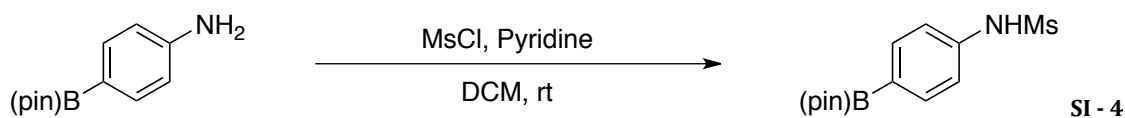

**(SI-4): N-(4-(4,4,5,5-Tetramethyl-1,3,2-dioxaborolan-2-yl)phenyl)methanesulfonamide.** p-(4,4,5,5-Tetramethyl-1,3,2-dioxaborolan-2-yl)aniline (5.0 g, 23 mmol) was sulfonated with methanesulfonyl chloride (2.6 g, 23 mmol) according to General Procedure A. The crude product was isolated as a pure white solid (91% Yield). <sup>1</sup>H-NMR (600 MHz, CDCl<sub>3</sub>): δ 7.82 (d, J = 8.4 Hz, 2H), 7.22 (d, J = 8.4 Hz, 2H), 3.05 (s, 3H), 1.37 (s, 12H). <sup>13</sup>C-NMR (100 MHz, CDCl<sub>3</sub>): δ 139.40, 136.46, 118.57, 83.95, 39.52, 24.86. IR (Thin Film, cm<sup>-1</sup>): 3253, 2979, 1608, 1361, 1332, 1143, 967, 857. LRMS (ESI): Calculated for [C<sub>13</sub>H<sub>20</sub>BNO<sub>4</sub>SN<sub>a</sub>]<sup>+</sup> 320.17, found 320.31.

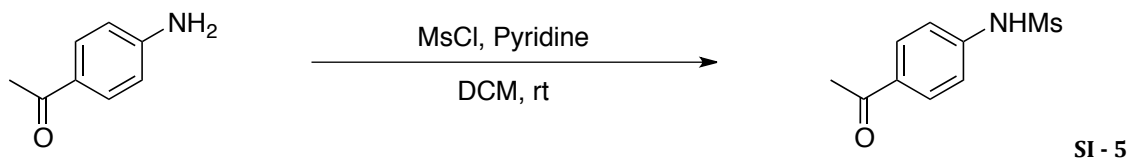

**(SI-5): N-(4-acetylphenyl)methanesulfonamide.** 4'-aminoacetophenone (9.0 g, 66.5 mmol) was sulfonated with methanesulfonyl chloride (7.6 g, 66.5 mmol) according to General Procedure A. The crude product was isolated as a pure white solid (85% Yield). All physical and spectroscopic data were in accordance with the literature data.<sup>5</sup>

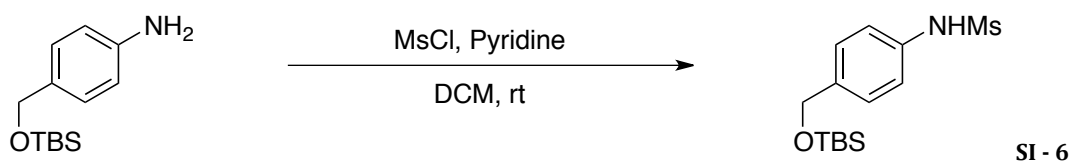

**(SI-6): N-(4-((tert-butyldimethylsilyloxy)methyl)phenyl)methanesulfonamide.** 4-((tert-butyldimethylsilyloxy)methyl)aniline (10 g, 42.2 mmol) was sulfonated with methanesulfonyl chloride (4.8 g, 42.2 mmol) according to General Procedure A. The crude product was isolated as a pure white solid (88% Yield). <sup>1</sup>H-NMR (600 MHz, D<sub>2</sub>O): δ 7.13 (d, J = 8.4 Hz, 2H), 6.89 (d, J = 8.4 Hz, 2H), 2.76 (s, 3H), 0.80 (s, 9H), 0.02 (s, 6H). <sup>13</sup>C-NMR (100 MHz, CDCl<sub>3</sub>): δ 145.80, 132.22, 128.41, 121.97, 65.27, 38.43, 25.24, 17.74, -6.04. IR (Thin Film, cm<sup>-1</sup>): 2930, 1505, 1256, 1197, 1092, 999, 837, 775. LRMS (ESI): Calculated for [C<sub>14</sub>H<sub>25</sub>NO<sub>3</sub>SSiNa]<sup>+</sup> 338.49, found 338.38.

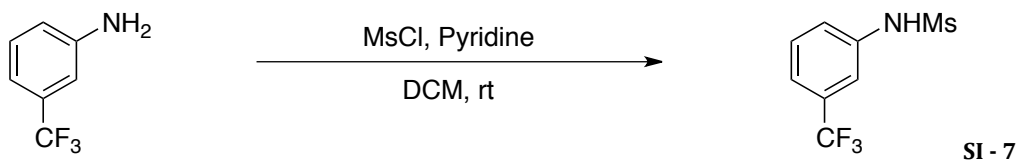

**(SI-7): N-(3-trifluoromethylphenyl)methanesulfonamide.** m-Trifluoromethylaniline (7.3 g, 45 mmol) was sulfonated with methanesulfonyl chloride (5.2 g, 45 mmol) according to General Procedure A. The crude product was isolated as a pure white solid (52% Yield). All physical and spectroscopic data were in accordance with the literature data.<sup>3</sup>

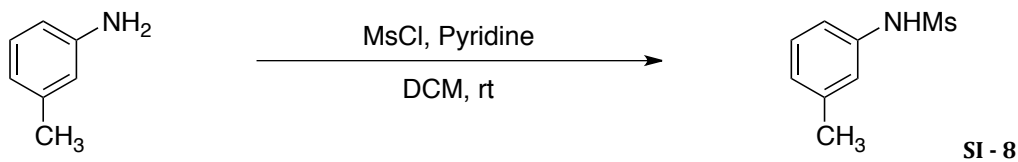

**(SI-8): N-(3-tolyl)methanesulfonamide.** m-Toluidine (4.8 g, 45 mmol) was sulfonated with methanesulfonyl chloride (5.2 g, 45 mmol) according to General Procedure A. The crude

product was isolated as a pure white solid (98% Yield). All physical and spectroscopic data were in accordance with the literature data.<sup>3</sup>

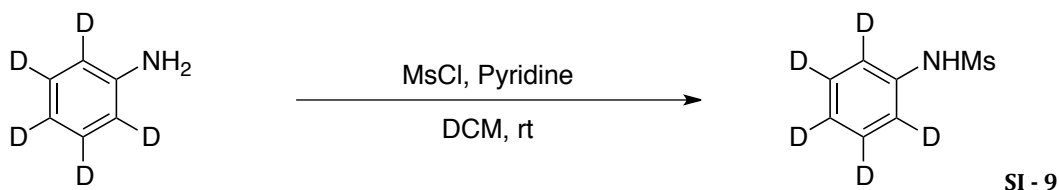

**(SI-9): N-(d<sub>5</sub>-phenyl)methanesulfonamide.** Aniline-2,3,4,5,6-d<sub>5</sub> (2.0 g, 20. mmol) was sulfonated with methanesulfonyl chloride (2.3 g, 20 mmol) according to General Procedure A. The crude product was isolated as a pure white solid (94% Yield). **<sup>1</sup>H-NMR** (600 MHz, CDCl<sub>3</sub>): δ 6.33 (bs, 1H) 3.04 (s, 3H). **<sup>13</sup>C-NMR** (100 MHz, CDCl<sub>3</sub>): δ 136.51, 126.39, 129.23, 129.06, 124.95, 120.48, 120.31, 120.15, 39.30. **IR** (Thin Film, cm<sup>-1</sup>): 3263, 1565, 1381, 1308, 1149, 911, 770, 555, 512. **LRMS** (ESI): Calculated for [C<sub>7</sub>H<sub>4</sub>D<sub>5</sub>NO<sub>2</sub>SH]<sup>+</sup> 177.07, found 177.08.

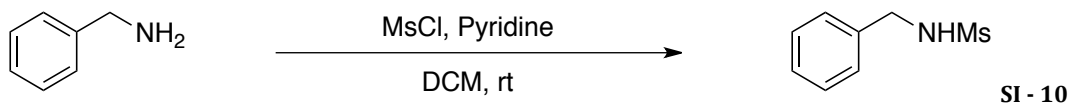

**(SI-10): N-benzylmethanesulfonamide.** Benzylamine (7.1 g, 66. mmol) was sulfonated with methanesulfonyl chloride (7.2 g, 66 mmol) according to General Procedure A. The crude product was isolated as a pure white solid (99% Yield). All physical and spectroscopic data were in accordance with the literature data.<sup>6</sup>

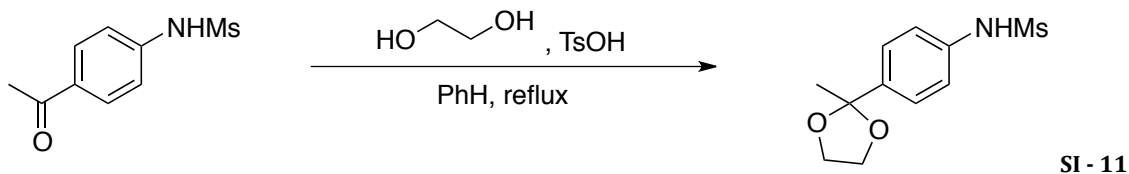

**(SI-11): N-(4-(2-methyl-1,3-dioxolan-2-yl)phenyl)methanesulfonamide.** To a solution of sulfonamide SI-5 (10.0 g, 46.9 mmol, 1 equiv.) in benzene (50 mL, 1.0 M) was added p-toluenesulfonic acid monohydrate (0.89 g, 2.7 mmol, 10 mol%) and ethylene glycol (3.5 g, 56.3 mmol, 1.2 equiv). The reaction mixture was heated to reflux using a Dean Stark apparatus and reflux condenser and stirred for 18 hours before being quenched with saturated NaHCO<sub>3</sub>. The aqueous layer was extracted with DCM and the combined organic layer was washed with brine, dried over MgSO<sub>4</sub>, filtered and concentrated. The crude product was purified by flash chromatography using hexanes/ethyl acetate (1:1) to provide epoxide SI-11 as a white solid (56% Yield). **<sup>1</sup>H-NMR** (600 MHz, CDCl<sub>3</sub>): δ 7.47 (d, J = 8.4 Hz, 2H), 7.19 (d, J = 8.4 Hz, 2H), 4.04 (m, 2H), 3.78 (m, 2H), 3.03 (s, 3H), 1.64 (s, 3H). **<sup>13</sup>C-NMR** (100 MHz, CDCl<sub>3</sub>): δ 141.17, 130.83, 127.26, 120.89, 108.94, 64.99, 40.01, 28.01. **IR** (Thin Film, cm<sup>-1</sup>):

3251, 1673, 1603, 1329, 1153, 1037, 970. **LRMS** (ESI): Calculated for  $[C_{11}H_{15}NO_4SNa]^+$  280.30, found 280.31.

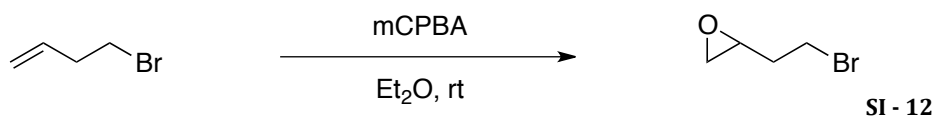

**(SI-12): (2-bromoethyl)oxirane.** Following General Procedure C, 4-bromo-1-butene (8.0 g, 59.3 mmol) was epoxidized with mCPBA (75%, 20 g, 88.9 mmol). The crude product was isolated as a pure clear oil (89% Yield). All physical and spectroscopic data were in accordance with the literature data.<sup>7</sup>

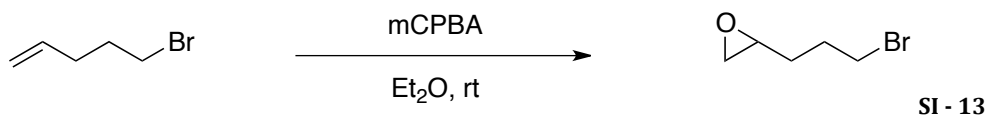

**(SI-13): (2-bromoethyl)oxirane.** Following General Procedure C, 5-bromo-1-pentene (6.0 g, 40 mmol) was epoxidized with mCPBA (75%, 15 g, 60 mmol). The crude product was isolated as a pure clear oil (97% Yield). All physical and spectroscopic data were in accordance with the literature data.<sup>8</sup>

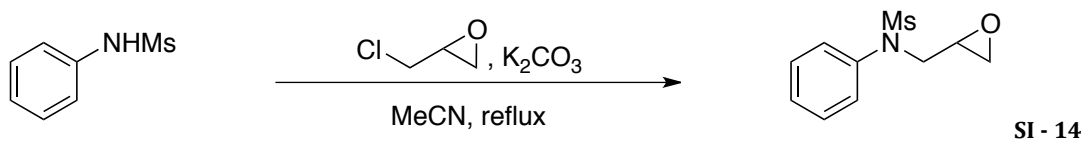

**(SI-14): N-(2,3-epoxypropyl)-n-phenylmethanesulfonamide.** Following General Procedure B, methanesulfonamide SI-1 (8.6 g, 50 mmol) was alkylated with epichlorohydrin (18.5 g, 200 mmol). The crude product was purified by flash chromatography using hexanes/ethyl acetate (3:1) to provide epoxide SI-14 as a white solid (70% Yield). All physical and spectroscopic data were in accordance with the literature data.<sup>9</sup>

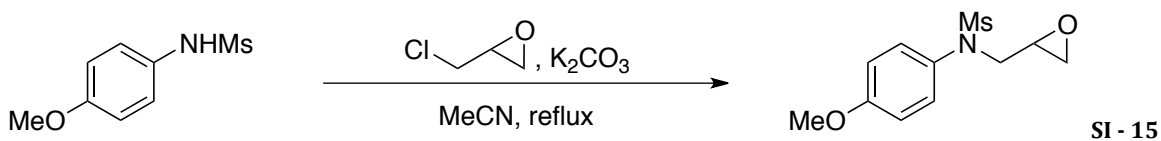

**(SI-15): N-(4-anisyl-n-(2,3-epoxypropyl))methanesulfonamide.** Following General Procedure B, methanesulfonamide SI-2 (3.2 g, 15.9 mmol) was alkylated with epichlorohydrin (11.7 g, 127 mmol). The crude product was purified by flash chromatography using hexanes/ethyl acetate (3:1) to provide epoxide SI-15 as a white solid (53% Yield). <sup>1</sup>H-NMR

(600 MHz, CDCl<sub>3</sub>): δ 7.34 (m, 2H), 6.95 (m, 2H), 3.84 (s, 3H), 3.83 (dd, J = 15.0 Hz, 4.2 Hz, 1H), 3.73 (dd, J = 15.0 Hz, 6.0 Hz, 1H), 3.19 (m, 1H), 2.98 (s, 3H), 2.79 (t, J = 4.8 Hz, 1H), 2.54 (m, 1H). <sup>13</sup>C-NMR (100 MHz, CDCl<sub>3</sub>): δ 159.51, 131.96, 130.30, 114.82, 55.47, 54.00, 50.30, 45.90, 38.19. IR (Thin Film, cm<sup>-1</sup>): 2933, 1509, 1336, 1251, 1152, 1029, 960, 842. LRMS (ESI): Calculated for [C<sub>11</sub>H<sub>15</sub>NO<sub>4</sub>SH]<sup>+</sup> 258.08, found 258.00.

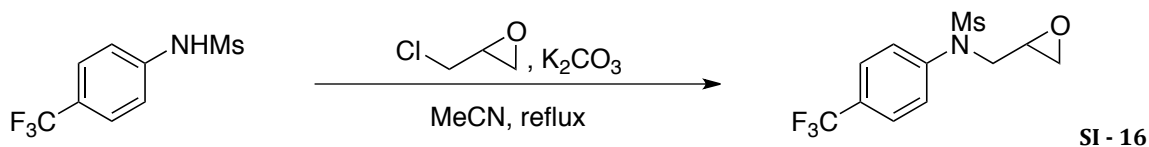

**(SI-16): N-(2,3-epoxypropyl)-n-(4-(trifluoromethyl)phenyl)methanesulfonamide.** Following General Procedure B, methanesulfonamide SI-3 (6.0 g, 25.0 mmol) was alkylated with epichlorohydrin (18.6 g, 200 mmol). The crude product was purified by flash chromatography using hexanes/ethyl acetate (3:1) to provide epoxide SI-16 as a white solid (77% Yield). <sup>1</sup>H-NMR (600 MHz, CDCl<sub>3</sub>): δ 7.71 (d, J = 8.4 Hz, 2H), 7.58 (d, J = 8.4 Hz, 2H), 4.07 (dd, J = 15.2 Hz, 3.6 Hz, 1H), 3.70 (dd, J = 15.2 Hz, 6.8 Hz, 1H), 3.27 (m, 1H), 3.01 (s, 3H), 2.72 (dd, J = 4.8 Hz, 2.4 Hz, 1H), 2.60 (dd, J = 4.8 Hz, 2.4 Hz, 1H). <sup>13</sup>C-NMR (100 MHz, CDCl<sub>3</sub>): δ 128.34, 126.79, 126.77, 53.61, 50.27, 45.75, 38.71. IR (Thin Film, cm<sup>-1</sup>): 2365, 1616, 1325, 1185, 1121, 1069, 511. LRMS (ESI): Calculated for [C<sub>11</sub>H<sub>12</sub>F<sub>3</sub>NO<sub>3</sub>SH]<sup>+</sup> 296.06, found 296.06.

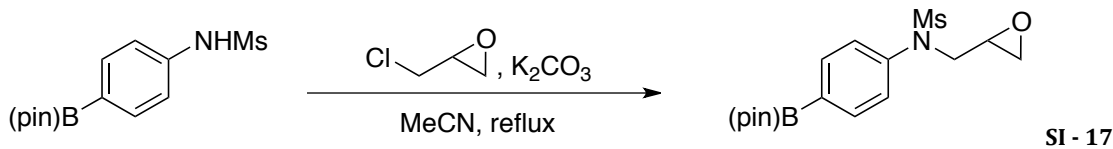

**(SI-17): N-(2,3-epoxypropyl)-n-(4-(4,4,5,5-Tetramethyl-1,3,2-dioxaborolan-2-yl)phenyl)methanesulfonamide.** Following General Procedure B, methanesulfonamide SI-4 (6.0 g, 20.2 mmol) was alkylated with epichlorohydrin (14.9 g, 162 mmol). The crude product was purified by flash chromatography using hexanes/ethyl acetate (2:1) to provide epoxide SI-17 as a white solid (47% Yield). <sup>1</sup>H-NMR (600 MHz, CDCl<sub>3</sub>): δ 7.89 (d, J = 8.4 Hz, 2H), 7.43 (d, J = 8.4 Hz, 2H), 7.89 (dd, J = 15 Hz, 6.0 Hz, 1H), 3.83 (dd, J = 15, 6.0 Hz, 1H), 3.19 (m, 1H), 2.98 (s, 3H), 2.78 (m, 1H), 2.54 (m, 1H), 1.37 (s, 12H). <sup>13</sup>C-NMR (100 MHz, CDCl<sub>3</sub>): δ 142.19, 136.17, 127.49, 84.10, 75.03, 53.54, 50.27, 45.99, 38.39, 24.86. IR (Thin Film, cm<sup>-1</sup>): 3528, 2980, 1605, 1361, 1148, 1093, 961, 857, 658, 550. LRMS (ESI): Calculated for [C<sub>16</sub>H<sub>24</sub>BNO<sub>5</sub>SNa]<sup>+</sup> 376.23, found 376.34.

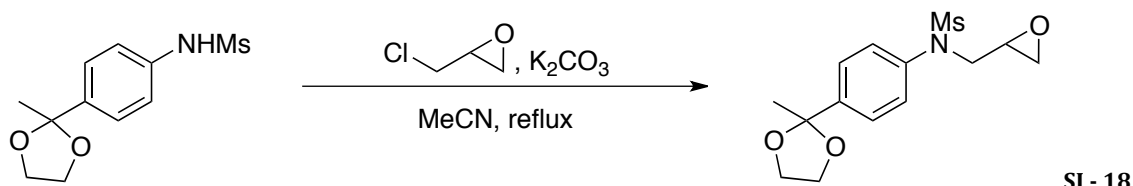

**(SI-18): N-(2,3-epoxypropyl)-n-(4-(2-methyl-1,3-dioxolan-2-yl)phenyl)methanesulfonamide.** Following General Procedure B, methanesulfonamide SI-11 (6.0 g, 23.3 mmol) was alkylated with epichlorohydrin (17.2 g, 186 mmol). The crude product was purified by flash chromatography using hexanes/ethyl acetate (1:1) to provide epoxide SI-18 as a white solid (56% Yield). **<sup>1</sup>H-NMR** (600 MHz, CDCl<sub>3</sub>): δ 7.53 (d, J = 8.4 Hz, 2H), 7.37 (d, J = 8.4, 2H), 4.05 (m, 2H), 3.87 (dd, J = 14.4 Hz, 3.6 Hz, 1H), 3.80 (m, 2H), 3.73 (dd, J = 15.0 Hz, 6.6 Hz, 1H), 3.18 (m, 1H), 2.98 (s, 3H), 2.79 (t, J = 4.2 Hz, 1H), 2.59 (m, 1H), 1.65 (s, 3H). **<sup>13</sup>C-NMR** (100 MHz, CDCl<sub>3</sub>): δ 144.27, 139.67, 128.89, 127.17, 108.93, 65.05, 54.34, 50.80, 46.45, 38.89, 28.07. **IR** (Thin Film, cm<sup>-1</sup>): 2989, 1506, 1340, 1155, 1037, 956, 872. **LRMS** (ESI): Calculated for [C<sub>14</sub>H<sub>19</sub>NO<sub>5</sub>SNa]<sup>+</sup> 336.36, found 336.29.

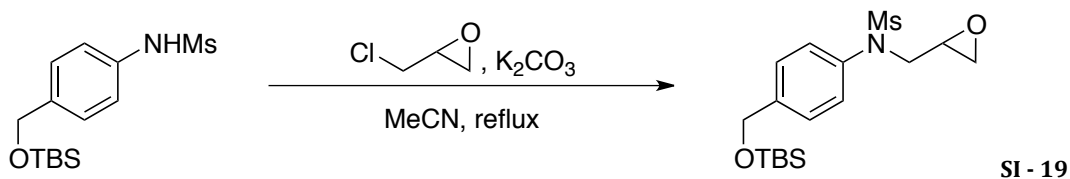

**(SI-19): N-(2,3-epoxypropyl)-n-(4-(tert-butyldimethylsilyloxy)methyl)phenyl)methanesulfonamide.** Following General Procedure B, methanesulfonamide SI-6 (7.0 g, 22.2 mmol) was alkylated with epichlorohydrin (16.5 g, 178 mmol). The crude product was purified by flash chromatography using hexanes/ethyl acetate (1:1) to provide epoxide SI-19 as a white solid (59% Yield). **<sup>1</sup>H-NMR** (600 MHz, CDCl<sub>3</sub>): δ 7.40 (m, 4H), 4.78 (s, 2H), 3.86 (dd, J = 15.0 Hz, 4.2 Hz, 1H), 3.79 (dd, J = 14.4 Hz, 6.0 Hz, 1H), 3.20 (m, 1H), 2.99 (s, 3H), 2.80 (t, J = 4.2 Hz, 1H), 2.55 (m, 1H), 0.98 (s, 9H), 0.14 (s, 6H). **<sup>13</sup>C-NMR** (100 MHz, CDCl<sub>3</sub>): δ 142.03, 138.16, 128.55, 127.08, 64.26, 53.87, 50.30, 46.01, 38.30, 25.94, 18.41, -5.29. **IR** (Thin Film, cm<sup>-1</sup>): 2931, 1509, 1342, 1255, 1155, 1089, 840, 777. **LRMS** (ESI): Calculated for [C<sub>17</sub>H<sub>29</sub>NO<sub>4</sub>SSiNa]<sup>+</sup> 394.56, found 394.39.

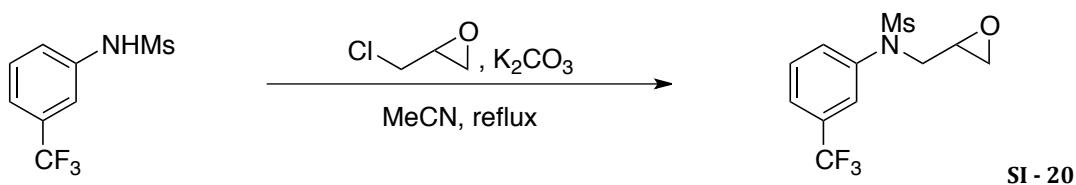

**(SI-20): N-(2,3-epoxypropyl)-n-(3-trifluoromethylphenyl)methanesulfonamide.** Following General Procedure B, methanesulfonamide SI-7 (4.0 g, 16.70 mmol) was alkylated with epichlorohydrin (12.4 g, 134 mmol). The crude product was purified by flash chromatography using hexanes/ethyl acetate (3:1) to provide epoxide SI-20 as a white solid (51 % Yield). **<sup>1</sup>H-NMR** (600 MHz, CDCl<sub>3</sub>): δ 7.70-7.64 (m, 3H), 7.59 (t, J = 7.6 Hz, 1H), 4.03 (dd, J = 14.4 Hz, 2.4 Hz, 1H), 3.71 (dd, J = 15.2 Hz, 6.0 Hz, 1H), 3.22 (m, 1H), 3.02 (s, 3H), 2.83 (dd, J = 4.0 Hz, 4.0 Hz, 1H), 2.59 (dd, J = 2.4 Hz, 2.4 Hz, 1H). **<sup>13</sup>C-NMR** (100 MHz, CDCl<sub>3</sub>): δ 140.37, 132.19, 132.08, 131.97, 130.23, 125.15, 125.13, 125.08, 125.05, 124.28, 122.47, 53.77, 50.77, 50.18, 45.70, 38.60. **IR** (Thin Film, cm<sup>-1</sup>): 3068, 3010, 2934, 1593, 1491, 1445, 1331, 1158, 919, 809, 757, 700, 539. **LRMS** (ESI): Calculated for [C<sub>11</sub>H<sub>12</sub>F<sub>3</sub>NO<sub>3</sub>SH]<sup>+</sup> 296.06, found 295.99.

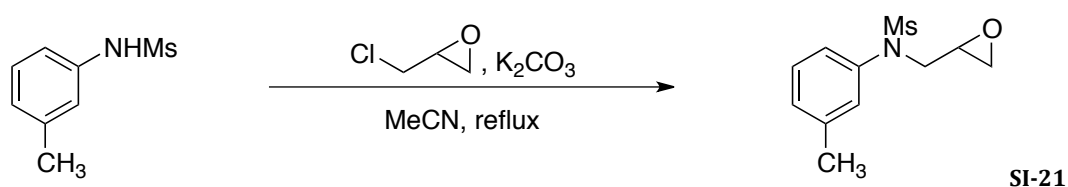

**(SI-21): N-(2,3-epoxypropyl)-n-(3-tolyl)methanesulfonamide.** Following General Procedure B, methanesulfonamide SI-8 (5.0 g, 27.0 mmol) was alkylated with epichlorohydrin (19.9 g, 216 mmol). The crude product was purified by flash chromatography using hexanes/ethyl acetate (3:1) to provide epoxide SI-21 as a white solid (69% Yield). **<sup>1</sup>H-NMR** (600 MHz, CDCl<sub>3</sub>): δ 7.33 (t, J = 8.4 Hz, 1H) 7.25-7.18 (m, 3H) 3.86 (dd, J = 14.8 Hz, 4.0 Hz, 1H), 3.77 (dd, J = 14.8 Hz, 6.0 Hz, 1H) 3.20 (m, 1H), 3.00 (s, 3H), 2.79 (dd, J = 4.0 Hz, 4.0 Hz, 1H) 2.56 (dd, J = 2.4 Hz, 2.4 Hz, 1H), 2.40 (s, 3H). **<sup>13</sup>C-NMR** (100 MHz, CDCl<sub>3</sub>): δ 139.72, 139.48, 129.43, 129.35, 129.27, 125.42, 53.80, 50.27, 45.93, 38.32, 21.30. **IR** (Thin Film, cm<sup>-1</sup>): 3005, 2929, 1605, 1487, 1337, 1155, 1074, 961, 825, 706, 612, 516. **LRMS** (ESI): Calculated for [C<sub>11</sub>H<sub>15</sub>NO<sub>3</sub>SH]<sup>+</sup> 242.08, found 242.12.

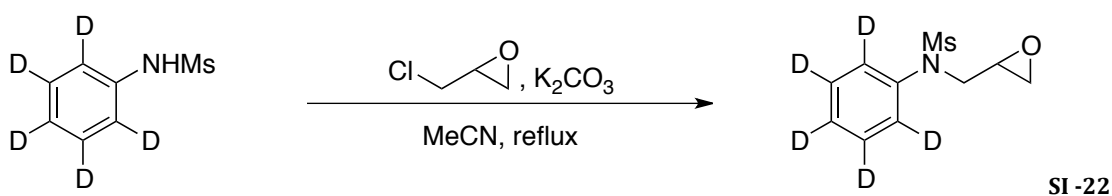

**(SI-22): N-(2,3-epoxypropyl)-n-(perdeuterophenyl)methanesulfonamide.** Following General Procedure B, methanesulfonamide SI-9 (2.5 g, 14.2 mmol) was alkylated with epichlorohydrin (10.5 g, 113 mmol). The crude product was purified by flash chromatography using hexanes/ethyl acetate (3:1) to provide epoxide SI-22 as a white solid (61% Yield). **<sup>1</sup>H-NMR** (600 MHz, CDCl<sub>3</sub>): δ 3.90 (dd, J = 14.8 Hz, 4.4 Hz, 1H), 3.79 (dd, J = 14.8 Hz, 6.0 Hz, 1H), 3.21 (m, 1H), 3.00 (s, 3H), 2.80 (dd, J = 4.4 Hz, 4.4 Hz, 1H), 2.56 (dd, J = 4.8 Hz, 2.4 Hz, 1H). **<sup>13</sup>C-**

**NMR** (100 MHz, CDCl<sub>3</sub>):  $\delta$  53.82, 50.29, 45.94, 38.34. **IR** (Thin Film, cm<sup>-1</sup>): 1382, 1336, 1152, 958, 815, 525. **LRMS** (ESI): Calculated for [C<sub>10</sub>H<sub>8</sub>D<sub>5</sub>NO<sub>3</sub>SH]<sup>+</sup> 233.10, found 233.11.

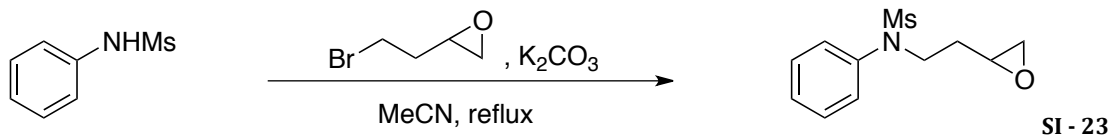

**(SI-23): N-(3,4-epoxybutyl)-n-phenylmethanesulfonamide.** Following General Procedure B, methanesulfonamide SI-1 (2.3 g, 13.3 mmol) was alkylated with (2-bromoethyl)oxirane (3.0 g, 19.9 mmol). The crude product was purified by flash chromatography using hexanes/ethyl acetate (3:1) to provide epoxide SI-23 as a white solid (62% Yield). **<sup>1</sup>H-NMR** (600 MHz, CDCl<sub>3</sub>):  $\delta$  7.50-7.33 (m, 5H), 3.89 (td, J = 7.2 Hz, 2.4 Hz, 2H), 2.99 (m, 1H), 2.93 (s, 3H) 2.78 (dd, J = 4.8 Hz, 4.4 Hz, 1H), 2.48 (dd, J = 4.8 Hz, 2.4 Hz, 1H) 1.87 (m, 1H), 1.69 (m, 1H). **<sup>13</sup>C-NMR** (100 MHz, CDCl<sub>3</sub>):  $\delta$  138.99, 129.61, 128.50, 128.28, 49.80, 48.02, 46.90, 37.03, 32.01. **IR** (Thin Film, cm<sup>-1</sup>): 2930, 1491, 1336, 1153, 1074, 961, 769, 700, 543, 521. **LRMS** (ESI): Calculated for [C<sub>11</sub>H<sub>15</sub>NO<sub>3</sub>SH]<sup>+</sup> 242.08, found 242.12.

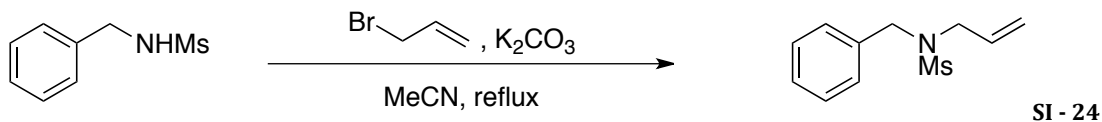

**(SI-24): N-allyl-n-benzylmethanesulfonamide.** Following General Procedure B, methanesulfonamide SI-10 (5.0 g, 27.0 mmol) was alkylated with allyl bromide (3.4 g, 28.3 mmol). The crude product was purified by flash chromatography using hexanes/ethyl acetate (6:1) to provide alkene SI-24 as a clear oil (75% Yield). All physical and spectroscopic data were in accordance with the literature data.<sup>6</sup>

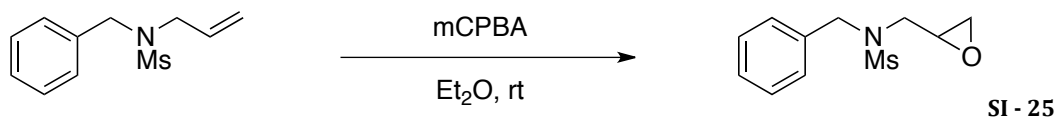

**(SI-25): N-benzyl-n-(2,3-epoxypropyl)methanesulfonamide.** Following General Procedure C, methanesulfonamide SI-24 (2.5 g, 11.1 mmol) was epoxidized with mCPBA (75%, 5.5 g, 22.2 mmol). The crude product was purified by flash chromatography using hexanes/ethyl acetate (3:1) to provide epoxide SI-25 as a white solid (56% Yield). **<sup>1</sup>H-NMR** (600 MHz, CDCl<sub>3</sub>):  $\delta$  7.47-7.29 (m, 5H), 4.56 (d, J = 3.2 Hz, 2H), 3.54 (dd, J = 14.8 Hz, 2.8 Hz, 1H), 3.16 (dd, J = 21.6 Hz, 6.8 Hz, 1H), 3.11 (m, 1H), 2.96 (s, 3H), 2.77 (dd, J = 4.4 Hz, 4.4 Hz, 1H), 2.48 (dd, J = 4.8 Hz, 2.4 Hz, 1H). **<sup>13</sup>C-NMR** (100 MHz, CDCl<sub>3</sub>):  $\delta$  135.64, 128.79, 128.59,



128.16, 51.63, 50.08, 49.21, 45.39, 39.59. **IR** (Thin Film,  $\text{cm}^{-1}$ ): 3007, 2929, 1722, 1329, 1255, 1149, 1027, 965, 935, 792, 700, 515. **LRMS** (ESI): Calculated for  $[\text{C}_{11}\text{H}_{15}\text{NO}_3\text{SH}]^+$  242.08, found 242.12.

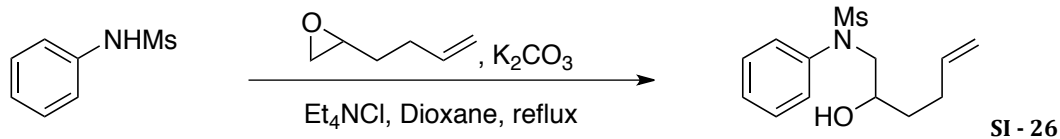

**(SI-26): N-(2-hydroxyhex-5-enyl)-n-phenylmethanesulfonamide.** To a solution of sulfonamide SI-1 (4.0 g, 23.4 mmol, 1 equiv.) in 1,4-dioxane (120 mL, 0.2 M) was added  $\text{K}_2\text{CO}_3$  (3.2 g, 23.4 mmol, 1 equiv.) and  $\text{Et}_4\text{NCl}$  (3.9 g, 23.4 mmol, 1 equiv.) and set to stir for 10 minutes at room temperature. 1,2-epoxy-5-hexene (2.3 g, 23.4 mmol, 1 equiv.) was then added, and the solution was heated to reflux and stirred for 24 hours before being quenched with water. The aqueous layer was extracted with  $\text{Et}_2\text{O}$  (3x), and the combined organic layer was washed with brine, dried over  $\text{MgSO}_4$ , filtered, and concentrated. The crude product was purified by flash chromatography using hexanes/ethyl acetate (1:1) to provide epoxide SI-26 as a white solid (32% Yield).  **$^1\text{H-NMR}$**  (600 MHz,  $\text{CDCl}_3$ ):  $\delta$  7.43 (m, 2H), 7.37 (m, 3H), 5.75 (m, 1H), 4.98 (dd,  $J = 25.8$  Hz, 10.2 Hz, 2H), 3.77 (dd,  $J = 13.8$  Hz, 8.4 Hz, 1H), 3.70 (m, 1H), 3.61 (dd,  $J = 13.8$  Hz, 3.0 Hz, 1H), 2.94 (s, 3H), 2.18 (m, 1H), 2.16 (m, 1H), 2.08 (m, 1H), 1.53 (m, 2H).  **$^{13}\text{C-NMR}$**  (100 MHz,  $\text{CDCl}_3$ ):  $\delta$  140.24, 138.43, 130.22, 129.09, 128.92, 115.62, 69.76, 57.80, 37.86, 33.96, 30.15. **IR** (Thin Film,  $\text{cm}^{-1}$ ): 3514, 2930, 1492, 1336, 1153, 965, 777, 698, 544. **LRMS** (ESI): Calculated for  $[\text{C}_{13}\text{H}_{19}\text{NO}_3\text{SNa}]^+$  292.35, found 292.38.

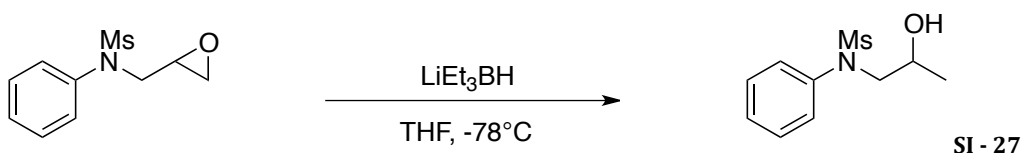

**(SI-27): N-(2-hydroxypropyl)-n-phenylmethanesulfonamide.** Following General Procedure D, epoxide SI-14 (3.5 g, 15.3 mmol) was reduced with super hydride (1M in THF, 18.4 mL, 18.4 mmol). The crude product was purified by flash chromatography using hexanes/ethyl acetate (3:1) to provide secondary alcohol SI-27 as a white solid (83% Yield).  **$^1\text{H-NMR}$**  (600 MHz,  $\text{CDCl}_3$ ):  $\delta$  7.45 (m, 2H), 7.39 (m, 3H), 3.88 (m, 1H), 3.77 (dd,  $J = 8.4$  Hz, 7.8 Hz, 1H), 3.57 (dd,  $J = 14.4$  Hz, 3.6 Hz, 1H), 2.97 (s, 3H), 1.19 (d,  $J = 6.0$  Hz, 3H).  **$^{13}\text{C-NMR}$**  (100 MHz,  $\text{CDCl}_3$ ):  $\delta$  139.72, 129.71, 128.62, 128.42, 65.80, 58.53, 37.37, 20.37. **IR** (Thin Film,  $\text{cm}^{-1}$ ): 3511, 2974, 2931, 1491, 1333, 1152, 1070, 968, 866, 778, 698, 544. **LRMS** (ESI): Calculated for  $[\text{C}_{10}\text{H}_{15}\text{NO}_3\text{SH}]^+$  230.08, found 230.09.

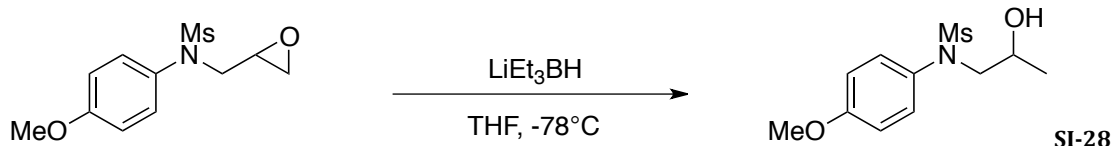

**(SI-28): N-(2-hydroxypropyl)-n-(4-methoxyphenyl)methanesulfonamide.** Following General Procedure D, epoxide SI-15 (2.4 g, 9.1 mmol) was reduced with super hydride (1M in THF, 10.9 mL, 10.9 mmol). The crude product was purified by flash chromatography using hexanes/ethyl acetate (1:1) to provide secondary alcohol SI-28 as a white solid (73% Yield). **<sup>1</sup>H-NMR** (400 MHz, CDCl<sub>3</sub>): δ 7.22 (m, 2H), 6.85 (m, 2H), 3.79 (m, 1H), 3.77 (m, 3H), 3.64 (dd, J = 14.4 Hz, 8.4 Hz, 1H), 3.42 (dd, J = 14.4 Hz, 3.6 Hz, 1H), 2.87 (s, 3H), 2.14 (m, 1H), 1.10 (d, J = 6.0 Hz, 3H). **<sup>13</sup>C-NMR** (100 MHz, CDCl<sub>3</sub>): δ 159.38, 132.02, 129.91, 114.80, 65.63, 58.63, 55.43, 387.20, 20.29. **IR** (Thin Film, cm<sup>-1</sup>): 3515, 2932, 1509, 1330, 1250, 1151, 1029, 970, 837. **LRMS** (ESI): Calculated for [C<sub>11</sub>H<sub>17</sub>NO<sub>4</sub>SH]<sup>+</sup> 260.10, found 260.17.

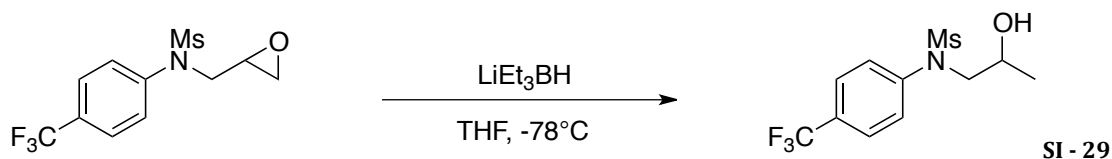

**(SI-29): N-(2-hydroxypropyl)-n-(4-(trifluoromethyl)phenyl)methanesulfonamide.** Following General Procedure D, epoxide SI-16 (4.0 g, 13.6 mmol) was reduced with super hydride (1M in THF, 16.3 mL, 16.3 mmol). The crude product was purified by flash chromatography using hexanes/ethyl acetate (1:1) to provide secondary alcohol SI-29 as a white solid (55% Yield). **<sup>1</sup>H-NMR** (600 MHz, CDCl<sub>3</sub>): δ 7.71 (d, J = 8.4 Hz, 2H), 7.55 (d, J = 8.4 Hz, 2H), 3.91 (m, 1H), 3.79 (dd, J = 14.4 Hz, 8.4 Hz, 1H), 3.65 (dd, J = 14.4 Hz, 3.6 Hz, 1H), 3.00 (s, 3H), 1.98 (bs, 1H), 1.22 (d, J = 6.0 Hz, 3H). **<sup>13</sup>C-NMR** (100 MHz, CDCl<sub>3</sub>): δ 143.14, 128.61, 126.84, 126.82, 126.80, 65.95, 58.21, 37.92, 20.63. **IR** (Thin Film, cm<sup>-1</sup>): 3505, 1615, 1325, 1159, 1126, 1070, 1017, 970, 873, 788, 525. **LRMS** (ESI): Calculated for [C<sub>11</sub>H<sub>14</sub>F<sub>3</sub>NO<sub>3</sub>SH]<sup>+</sup> 298.07, found 298.09.

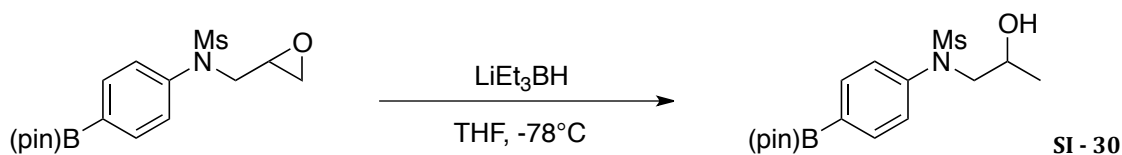

**(SI-30): N-(2-hydroxypropyl)-n-(4-(4,4,5,5-Tetramethyl-1,3,2-dioxaborolan-2-yl)phenyl)methanesulfonamide.** Following General Procedure D, epoxide SI-17 (1.5 g, 4.2 mmol) was reduced with super hydride (1M in THF, 5.1 mL, 5.1 mmol). The crude product was purified by flash chromatography using hexanes/ethyl acetate (1:1) to provide secondary

alcohol SI-30 as a white solid (60% Yield). **<sup>1</sup>H-NMR** (600 MHz, CDCl<sub>3</sub>): δ 7.89 (d, J = 8.4 Hz, 2H), 7.41 (d, J = 8.4 Hz, 2H), 3.88 (m, 1H), 3.79 (dd, J = 14.4 Hz, 8.4 Hz, 1H), 3.62 (dd, J = 14.4, 3.6 Hz, 1H), 2.96 (s, 3H), 1.37 (s, 12H), 1.19 (d, J = 6.0 Hz, 3H). **<sup>13</sup>C-NMR** (100 MHz, CDCl<sub>3</sub>): δ 143.71, 137.66, 129.01, 90.06, 85.56, 67.35, 59.77, 54.98, 38.85, 26.29, 26.26, 21.82. **IR** (Thin Film, cm<sup>-1</sup>): 3504, 2978, 1605, 1361, 1146, 1092, 966, 857, 657. **LRMS** (ESI): Calculated for [C<sub>16</sub>H<sub>26</sub>BNO<sub>5</sub>SNa]<sup>+</sup> 378.25, found 378.36.

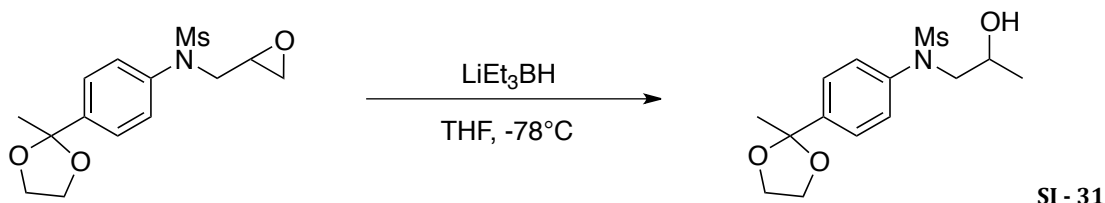

**SI-31): N-(2-hydroxypropyl)-n-(4-(2-methyl-1,3-dioxolan-2-yl)phenyl)methane sulfonamide.** Following General Procedure D, epoxide SI-18 (2.5 g, 8.0 mmol) was reduced with super hydride (1M in THF, 9.6 mL, 9.6 mmol). The crude product was purified by flash chromatography using hexanes/ethyl acetate (1:1) to provide secondary alcohol SI-31 as a white solid (70% Yield). **<sup>1</sup>H-NMR** (600 MHz, CDCl<sub>3</sub>): δ 7.53 (d, J = 8.4 Hz, 2H), 7.34 (d, J = 8.4 Hz, 2H), 4.05 (m, 2H), 3.85 (m, 1H), 3.79 (m, 2H), 3.73 (dd, J = 14.4 Hz, 6.0 Hz, 1H), 3.55 (dd, J = 14.4 Hz, 3.6 Hz, 1H), 2.92 (s, 3H), 2.08 (bs, 1H), 1.64 (s, 3H), 1.17 (d, J = 6.6 Hz, 3H). **<sup>13</sup>C-NMR** (100 MHz, CDCl<sub>3</sub>): δ 144.29, 139.71, 128.83, 127.20, 108.91, 66.31, 65.05, 59.07, 37.87, 28.06, 20.84. **IR** (Thin Film, cm<sup>-1</sup>): 3504, 2981, 1506, 1336, 1155, 1037, 969, 871. **LRMS** (ESI): Calculated for [C<sub>14</sub>H<sub>21</sub>NO<sub>5</sub>SNa]<sup>+</sup> 338.37, found 338.32.

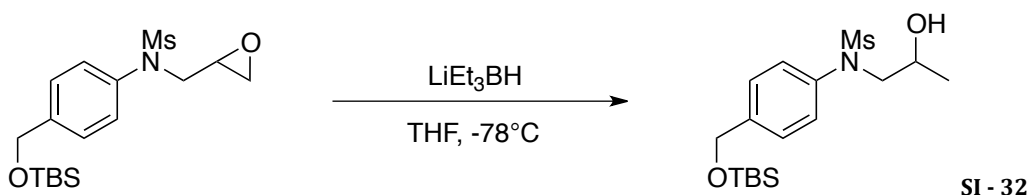

**SI-32): N-(2-hydroxypropyl)-n-(4-(tert-butyl dimethylsilyloxy methyl)phenyl)methane sulfonamide.** Following General Procedure D, epoxide SI-19 (4.2 g, 11.3 mmol) was reduced with super hydride (1M in THF, 13.6 mL, 13.6 mmol). The crude product was purified by flash chromatography using hexanes/ethyl acetate (1:1) to provide secondary alcohol SI-32 as a white solid (69% Yield). **<sup>1</sup>H-NMR** (600 MHz, CDCl<sub>3</sub>): δ 7.41 (d, J = 8.4 Hz, 2H), 7.37 (d, J = 8.4 Hz, 2H), 4.78 (s, 2H), 3.87 (m, 1H), 3.77 (dd, J = 14.4 Hz, 8.4 Hz, 1H), 3.57 (dd, J = 14.4 Hz, 3.0 Hz, 1H), 2.97 (s, 3H), 1.20 (d, J = 6.6 Hz, 3H), 0.98 (s, 9H), 0.14 (s, 6H). **<sup>13</sup>C-NMR** (100 MHz, CDCl<sub>3</sub>): δ 142.00, 138.26, 128.44, 127.14, 65.83, 64.24, 58.60, 37.32, 25.94, 20.38, 18.42, -5.29. **IR** (Thin Film, cm<sup>-1</sup>): 3515, 2931, 1509, 1338, 1255, 1155, 1090, 969, 839, 778. **LRMS** (ESI): Calculated for [C<sub>17</sub>H<sub>31</sub>NO<sub>4</sub>SSiNa]<sup>+</sup> 396.57, found 396.43.

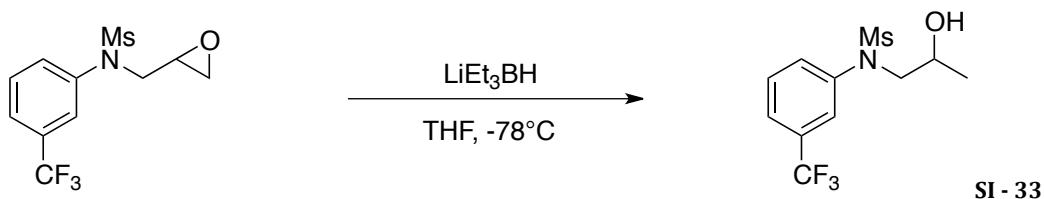

**(SI-33): N-(2-hydroxypropyl)-n-(3-trifluoromethylphenyl)methanesulfonamide.** Following General Procedure D, epoxide SI-20 (1.9 g, 6.3 mmol) was reduced with super hydride (1M in THF, 7.5 mL, 7.5 mmol). The crude product was purified by flash chromatography using hexanes/ethyl acetate (2:1) to provide secondary alcohol SI-33 as a white solid (62% Yield). **<sup>1</sup>H-NMR** (600 MHz, CDCl<sub>3</sub>): δ 7.64 (m, 4H), 3.92 (m, 1H), 3.79 (dd, J = 14.0 Hz, 6.6 Hz, 1H), 3.63 (dd, J = 14.0 Hz, 3.6 Hz, 1H), 3.00 (s, 3H), 1.97 (d, J = 4.4 Hz, 1H), 1.22 (d, J = 6.0 Hz, 3H). **<sup>13</sup>C-NMR** (100 MHz, CDCl<sub>3</sub>): δ 171.05, 139.66, 139.51, 129.40, 129.24, 129.00, 125.44, 65.42, 60.28, 37.35, 20.86. **IR** (Thin Film, cm<sup>-1</sup>): 3502, 2930, 1333, 1153, 1074, 970, 757, 514. **LRMS** (ESI): Calculated for [C<sub>11</sub>H<sub>14</sub>F<sub>3</sub>NO<sub>3</sub>SH]<sup>+</sup> 298.07, found 298.06.

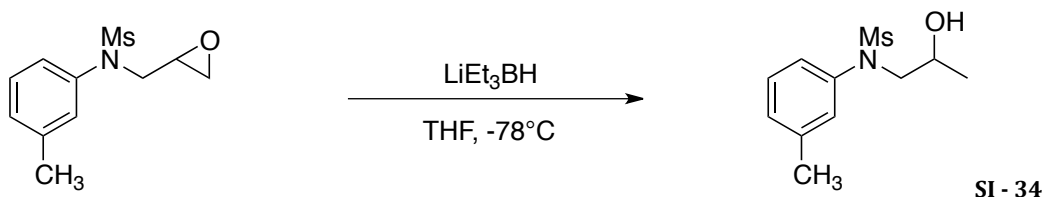

**(SI-34): N-(2-hydroxypropyl)-n-(3-tolyl)methanesulfonamide.** Following General Procedure D, epoxide SI-21 (2.5 g, 10.4 mmol) was reduced with super hydride (1M in THF, 12.4 mL, 12.4 mmol). The crude product was purified by flash chromatography using hexanes/ethyl acetate (2:1) to provide secondary alcohol SI-34 as a white solid (58% Yield). **<sup>1</sup>H-NMR** (600 MHz, CDCl<sub>3</sub>): δ 7.31 (m, 1H), 7.20 (m, 2H), 3.87 (m, 1H), 3.76 (dd, J = 13.8 Hz, 8.4 Hz, 1H), 3.57 (dd, J = 13.8 Hz, 3.6 Hz, 1H), 2.97 (s, 3H), 2.40 (s, 3H), 1.20 (d, J = 6.6 Hz, 3H). **<sup>13</sup>C-NMR** (100 MHz, CDCl<sub>3</sub>): δ 139.86, 139.60, 129.46, 129.42, 129.30, 125.32, 65.81, 58.59, 37.36. **IR** (Thin Film, cm<sup>-1</sup>): 3507, 2973, 2929, 2360, 1605, 1333, 1154, 1074, 970, 709, 515. **LRMS** (ESI): Calculated for [C<sub>11</sub>H<sub>17</sub>NO<sub>3</sub>SH]<sup>+</sup> 244.10, found 244.11.

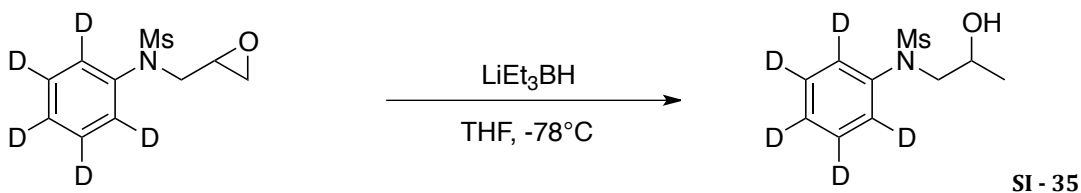

**(SI-35): N-(2-hydroxypropyl)-n-(perdeuterophenyl)methanesulfonamide.** Following General Procedure D, epoxide SI-22 (1.8 g, 7.5 mmol) was reduced with super hydride (1M in

THF, 9.0 mL, 9.0 mmol). The crude product was purified by flash chromatography using hexanes/ethyl acetate (2:1) to provide secondary alcohol SI-35 as a white solid (57% Yield). **<sup>1</sup>H-NMR** (600 MHz, CDCl<sub>3</sub>): δ 3.87 (m, 1H), 3.77 (dd, J = 14.4 Hz, 8.4 Hz, 1H), 3.58 (dd, J = 14.4 Hz, 3.6 Hz, 1H), 2.97 (s, 3H), 2.19 (d, J = 4.2 Hz, 1H), 1.19 (d, J = 6.0 Hz, 3H). **<sup>13</sup>C-NMR** (100 MHz, CDCl<sub>3</sub>): δ 139.58, 129.37, 129.21, 129.05, 128.34, 128.18, 128.02, 65.79, 58.49, 37.34, 20.35. **IR** (Thin Film, cm<sup>-1</sup>): 3509, 2973, 2932, 1563, 1378, 1329, 1153, 1059, 971, 814, 763. **LRMS** (ESI): Calculated for [C<sub>10</sub>H<sub>10</sub>D<sub>5</sub>NO<sub>3</sub>SH]<sup>+</sup> 235.12, found 235.08.

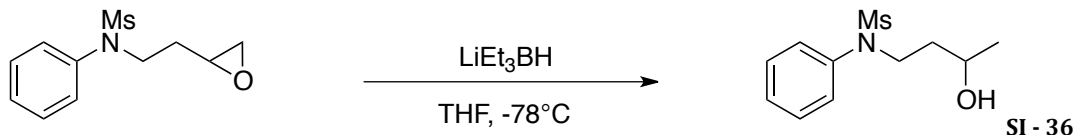

**(SI-36): N-(3-hydroxybutyl)-n-phenylmethanesulfonamide.** Following General Procedure D, epoxide SI-23 (2.0 g, 8.3 mmol) was reduced with super hydride (1M in THF, 9.9 mL, 9.9 mmol). The crude product was purified by flash chromatography using hexanes/ethyl acetate (1:1) to provide secondary alcohol SI-36 as a white solid (53% Yield). **<sup>1</sup>H-NMR** (600 MHz, CDCl<sub>3</sub>): δ 7.44 (m, 2H), 7.37 (m, 3H), 4.05 (m, 1H), 4.02-3.97 (m, 1H), 3.73-3.69 (m, 1H), 2.93 (s, 3H), 2.27 (d, J = 4.2 Hz, 1H), 1.63-1.59 (m, 1H), 1.54-1.52 (m, 1H), 1.22 (d, J = 6.0 Hz, 3H). **<sup>13</sup>C-NMR** (100 MHz, CDCl<sub>3</sub>): δ 138.87, 129.60, 128.57, 128.28, 64.15, 47.80, 37.44, 36.91, 23.20. **IR** (Thin Film, cm<sup>-1</sup>): 3506, 2930, 1492, 1332, 1153, 1075, 959, 775, 699, 543. **LRMS** (ESI): Calculated for [C<sub>11</sub>H<sub>17</sub>NO<sub>3</sub>SH]<sup>+</sup> 244.10, found 244.16.

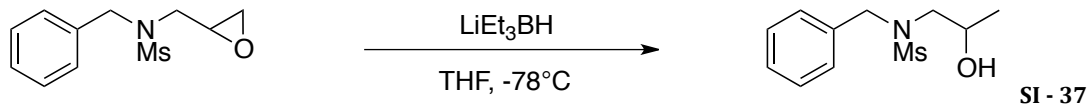

**(SI-37): N-benzyl-n-(2-hydroxypropyl)methanesulfonamide.** Following General Procedure D, epoxide SI-25 (1.0 g, 4.1 mmol) was reduced with super hydride (1M in THF, 4.9 mL, 4.9 mmol). The crude product was purified by flash chromatography using hexanes/ethyl acetate (1:1) to provide secondary alcohol SI-37 as a white solid (76% Yield). **<sup>1</sup>H-NMR** (600 MHz, CDCl<sub>3</sub>): δ 7.40 (m, 3H), 7.35 (m, 1H), 4.55 (d, J = 15.00 Hz, 1H), 4.45 (d, J = 15.0 Hz, 1H), 3.27 (dd, J = 15.0 Hz, 9.0 Hz, 1H), 3.12 (dd, J = 15.0 Hz, 2.4 Hz, 1H), 2.93 (s, 3H), 1.12 (d, J = 6.6 Hz, 3H). **<sup>13</sup>C-NMR** (100 MHz, CDCl<sub>3</sub>): δ 135.89, 128.90, 128.49, 128.22, 65.74, 54.88, 52.39, 38.81, 20.80. **IR** (Thin Film, cm<sup>-1</sup>): 3504, 2930, 1321, 1145, 1022, 958, 795, 700, 518. **LRMS** (ESI): Calculated for [C<sub>11</sub>H<sub>17</sub>NO<sub>3</sub>SH]<sup>+</sup> 244.10, found 244.09.

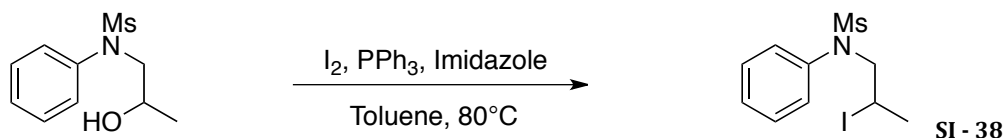

**(SI-38): N-(2-iodopropyl)-n-phenylmethanesulfonamide.** Secondary alcohol SI-27 (1.0 g, 4.3 mmol) was iodinated with molecular iodine (1.2 g, 4.6 mmol) following General Procedure E. The crude product was purified by flash chromatography using hexanes/ethyl acetate (7:1) to provide secondary iodide SI-38 as a white solid (62% Yield). **<sup>1</sup>H-NMR** (600 MHz, CDCl<sub>3</sub>): δ 7.47-7.44 (m, 2H), 7.41-7.38 (m, 3H), 4.13 (dd, J = 13.8 Hz, 6.6 Hz, 1H), 4.02 (m, 1H), 3.90 (dd, J = 13.8 Hz, 8.4 Hz, 1H), 2.94 (s, 3H), 1.93 (d, J = 6.6 Hz, 3H). **<sup>13</sup>C-NMR** (100 MHz, CDCl<sub>3</sub>): δ 138.93, 129.80, 128.59, 128.55, 60.29, 37.56, 24.93, 23.14. **IR** (Thin Film, cm<sup>-1</sup>): 2925, 1593, 1491, 1341, 1153, 1059, 964, 843, 776, 697, 541. **LRMS** (ESI): Calculated for [C<sub>10</sub>H<sub>14</sub>INO<sub>2</sub>SH]<sup>+</sup> 339.99, found 339.91.

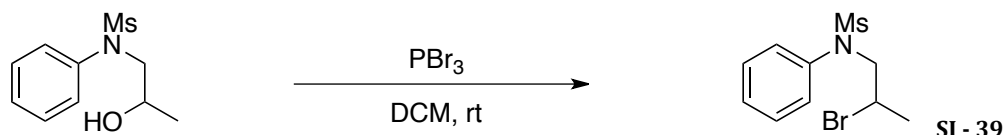

**(SI-39): N-(2-bromopropyl)-n-phenylmethanesulfonamide.** Secondary alcohol SI-28 (1.5 g, 6.3 mmol) was brominated with phosphorus tribromide (0.3 mL, 3.2 mmol) following General Procedure F. The crude product was purified by flash chromatography using hexanes/ethyl acetate (7:1) to provide secondary bromide SI-39 as a white solid (46% Yield). **<sup>1</sup>H-NMR** (600 MHz, CDCl<sub>3</sub>): δ 7.47-7.44 (m, 2H), 7.42-7.38 (m, 3H), 4.07 (dd, J = 13.2 Hz, 6.6 Hz, 1H), 4.02 (m, 1H), 3.90 (dd, J = 13.8 Hz, 7.2 Hz, 1H), 2.96 (s, 3H), 1.73 (d, J = 6.6 Hz, 3H). **<sup>13</sup>C-NMR** (100 MHz, CDCl<sub>3</sub>): δ 139.08, 129.78, 128.66, 128.60, 58.70, 46.05, 37.77, 22.91. **IR** (Thin Film, cm<sup>-1</sup>): 2981, 2929, 2360, 1593, 1492, 1341, 1156, 1067, 965, 849, 777, 698, 542. **LRMS** (ESI): Calculated for [C<sub>10</sub>H<sub>14</sub>BrNO<sub>2</sub>SH]<sup>+</sup> 292.00, found 291.98.

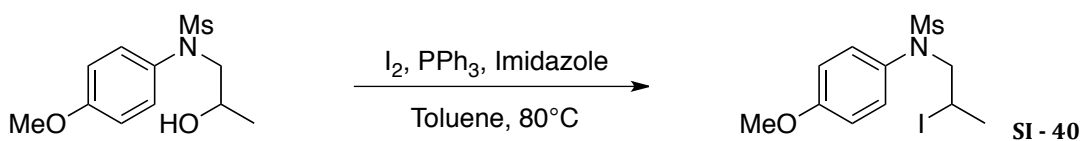

**(SI-40): N-(2-iodopropyl)-n-(4-methoxyphenyl)methanesulfonamide.** Secondary alcohol SI-29 (1.6 g, 6.2 mmol) was iodinated with molecular iodine (1.7 g, 6.5 mmol) following General Procedure E. The crude product was purified by flash chromatography using hexanes/ethyl acetate (4:1) to provide secondary iodide SI-40 as a white solid (72% Yield). **<sup>1</sup>H-NMR** (600 MHz, CDCl<sub>3</sub>): δ 3.32 (m, 2H), 6.95 (m, 2H), 4.07 (dd, J = 13.8 Hz, 6.6 Hz, 1H), 4.00 (m, 1H), 3.84 (s, 3H), 3.82 (dd, J = 13.8 Hz, 8.4 Hz, 1H), 2.93 (s, 3H), 1.93 (d, J = 6.6 Hz, 3H). **<sup>13</sup>C-NMR** (100 MHz, CDCl<sub>3</sub>): δ 159.54, 131.21, 129.90, 114.93, 60.45, 55.50, 37.47, 24.91, 23.34. **IR** (Thin Film, cm<sup>-1</sup>): 2929, 2838, 1606, 1509, 1448, 1339, 1251, 1153, 966, 843, 759, 545. **LRMS** (ESI): Calculated for [C<sub>11</sub>H<sub>16</sub>INO<sub>3</sub>SH]<sup>+</sup> 370.00, found 369.95.

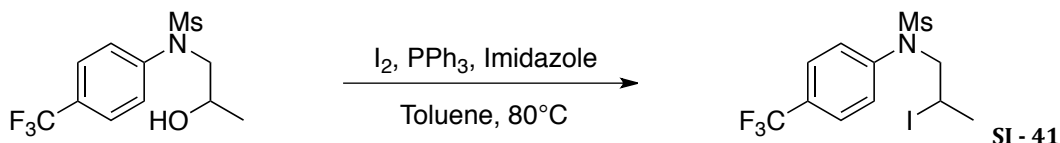

**(SI-41): N-(2-iodopropyl)-n-(4-(trifluoromethyl)phenyl)methanesulfonamide.** Secondary alcohol SI-30 (1.4 g, 4.7 mmol) was iodinated with molecular iodine (1.3 g, 5.0 mmol) following General Procedure E. The crude product was purified by flash chromatography using hexanes/ethyl acetate (4:1) to provide secondary iodide SI-41 as a white solid (64% Yield). **<sup>1</sup>H-NMR** (600 MHz, CDCl<sub>3</sub>): δ 7.73 (d, J = 8.4 Hz, 2H), 7.55 (d, J = 8.4 Hz, 2H), 4.14 (dd, J = 13.8 Hz, 6.6 Hz, 1H), 4.01 (m, 1H), 3.93 (dd, J = 13.8 Hz, 7.8 Hz, 1H), 2.96 (s, 3H), 1.92 (d, J = 7.2 Hz, 3H). **<sup>13</sup>C-NMR** (100 MHz, CDCl<sub>3</sub>): δ 142.28, 128.56, 126.94, 126.92, 126.89, 60.03, 37.92, 24.94, 22.50. **IR** (Thin Film, cm<sup>-1</sup>): 2928, 1615, 1325, 1158, 1068, 965, 853, 785, 602, 522. **LRMS** (ESI): Calculated for [C<sub>11</sub>H<sub>13</sub>F<sub>3</sub>INO<sub>2</sub>SH]<sup>+</sup> 407.97, found 408.02.

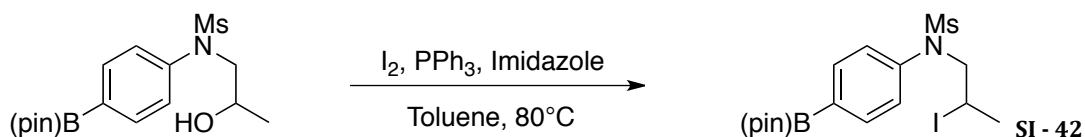

**(SI-42): N-(2-iodopropyl)-n-(4-(4,4,5,5-Tetramethyl-1,3,2-dioxaborolan-2-yl)phenyl)methanesulfonamide.** Secondary alcohol SI-31 (0.7 g, 2.0 mmol) was iodinated with molecular iodine (0.53 g, 2.1 mmol) following General Procedure E. The crude product was purified by flash chromatography using hexanes/ethyl acetate (5:1) to provide secondary iodide SI-42 as a white solid (56% Yield). **<sup>1</sup>H-NMR** (600 MHz, CDCl<sub>3</sub>): δ 7.89 (d, J = 8.4 Hz, 2H), 7.41 (d, J = 8.4 Hz, 2H), 4.15 (dd, J = 13.8, 6.6 Hz, 1H), 4.01 (m, 1H), 3.92 (dd, J = 13.8, 9.0 Hz, 1H), 2.93 (s, 3H), 1.92 (d, J = 7.2 Hz, 3H), 1.37 (s, 12H). **<sup>13</sup>C-NMR** (100 MHz, CDCl<sub>3</sub>): δ 141.50, 136.25, 127.47, 84.15, 60.11, 37.59, 24.96, 24.86, 24.85, 22.99. **IR** (Thin Film, cm<sup>-1</sup>): 2978, 2360, 1605, 1359, 1150, 1093, 963, 856, 657. **LRMS** (ESI): Calculated for [C<sub>16</sub>H<sub>25</sub>BINO<sub>4</sub>SnA]<sup>+</sup> 488.14, found 488.32.

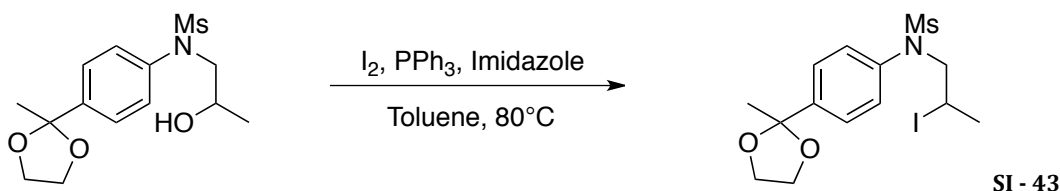

**(SI-43): N-(2-iodopropyl)-n-(4-(2-methyl-1,3-dioxolan-2-yl)phenyl)methanesulfonamide.** Secondary alcohol SI-32 (1.5 g, 4.8 mmol) was iodinated with molecular iodine (1.3 g, 5.0 mmol) following General Procedure E. The crude product was purified by flash chromatography using hexanes/ethyl acetate (5:1) to provide secondary iodide SI-43 as a white solid (64% Yield). **<sup>1</sup>H-NMR** (600 MHz, CDCl<sub>3</sub>): δ 7.54 (d, J = 8.4 Hz, 2H), 7.34 (d, J = 8.4

Hz, 2H), 4.09 (dd,  $J = 13.8$  Hz, 6.6 Hz, 1H), 4.06 (m, 2H), 3.98 (m, 1H), 3.87 (dd,  $J = 13.8$  Hz, 8.4 Hz, 1H), 3.81 (m, 2H), 2.93 (s, 3H), 1.92 (d,  $J = 7.2$  Hz, 3H), 1.65 (s, 3H).  $^{13}\text{C-NMR}$  (100 MHz,  $\text{CDCl}_3$ ):  $\delta$  138.87, 128.79, 127.29, 125.62, 108.91, 65.10, 60.79, 38.08, 28.06, 25.38, 23.57. **IR** (Thin Film,  $\text{cm}^{-1}$ ): 2985, 1505, 1341, 1154, 1038, 966, 872, 731. **LRMS** (ESI): Calculated for  $[\text{C}_{14}\text{H}_{20}\text{INO}_4\text{SNa}]^+$  448.27, found 448.25.

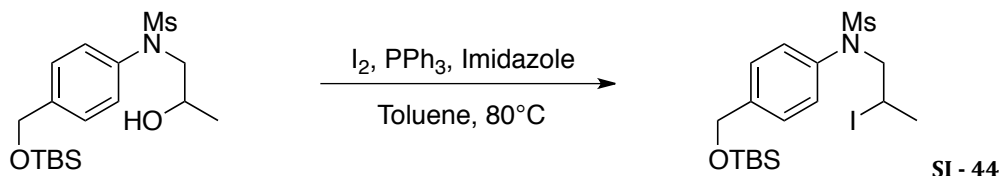

**(SI-44): N-(2-iodopropyl)-n-(4-(tert-butyldimethylsilyloxymethyl)phenyl)methanesulfonamide.** Secondary alcohol SI-33 (2.0 g, 5.4 mmol) was iodinated with molecular iodine (1.5 g, 5.7 mmol) following General Procedure E. The crude product was purified by flash chromatography using hexanes/ethyl acetate (5:1) to provide secondary iodide SI-44 as a white solid (65% Yield).  $^1\text{H-NMR}$  (600 MHz,  $\text{CDCl}_3$ ):  $\delta$  7.41 (d,  $J = 8.4$  Hz, 2H), 7.37 (d,  $J = 8.4$  Hz, 2H), 4.78 (s, 2H), 4.12 (dd,  $J = 13.8$  Hz, 6.0 Hz, 1H), 4.01 (m, 1H), 3.89 (dd,  $J = 14.4$  Hz, 8.4 Hz, 1H), 2.95 (s, 3H), 1.94 (d,  $J = 6.6$  Hz, 3H), 0.99 (s, 9H), 0.15 (s, 6H).  $^{13}\text{C-NMR}$  (100 MHz,  $\text{CDCl}_3$ ):  $\delta$  142.17, 137.44, 128.38, 127.17, 64.22, 60.35, 37.53, 25.95, 24.95, 23.21, 18.43, -5.29. **IR** (Thin Film,  $\text{cm}^{-1}$ ): 2929, 1509, 1343, 1254, 1155, 1091, 966, 839, 777. **LRMS** (ESI): Calculated for  $[\text{C}_{17}\text{H}_{30}\text{INO}_3\text{SSiNa}]^+$  506.47, found 506.38.

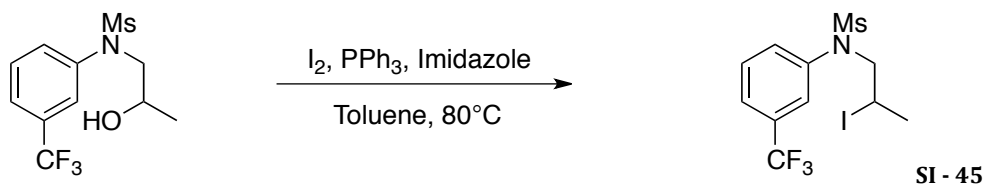

**(SI-45): N-(2-iodopropyl)-n-(3-(trifluoromethyl)phenyl)methanesulfonamide.** Secondary alcohol SI-34 (0.4 g, 1.3 mmol) was iodinated with molecular iodine (0.4 g, 1.4 mmol) following General Procedure E. The crude product was purified by flash chromatography using hexanes/ethyl acetate (7:1) to provide secondary iodide SI-45 as a white solid (77% Yield).  $^1\text{H-NMR}$  (600 MHz,  $\text{CDCl}_3$ ):  $\delta$  7.68-7.58 (m, 4H), 4.12 (dd,  $J = 13.8$  Hz, 6.6 Hz, 1H), 4.02 (m, 1H), 3.91 (dd,  $J = 13.8$  Hz, 7.8 Hz, 1H), 2.97 (s, 3H), 1.93 (d,  $J = 7.2$  Hz, 3H).  $^{13}\text{C-NMR}$  (100 MHz,  $\text{CDCl}_3$ ):  $\delta$  139.80, 132.20, 130.42, 125.37, 125.08, 60.26, 37.90, 24.97, 22.63. **IR** (Thin Film,  $\text{cm}^{-1}$ ): 2927, 1593, 1491, 1447, 1328, 1156, 1069, 966, 810, 700, 539. **LRMS** (ESI): Calculated for  $[\text{C}_{11}\text{H}_{13}\text{F}_3\text{INO}_2\text{SH}]^+$  407.97, found 407.95.



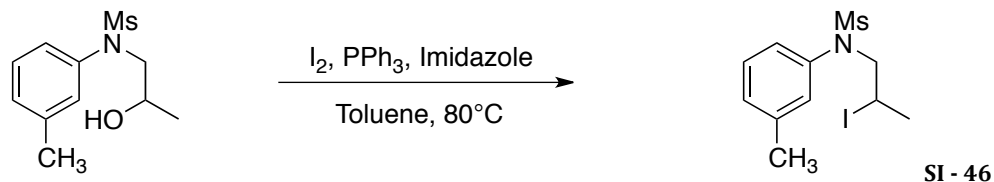

**(SI-46): N-(2-iodopropyl)-n-(3-tolyl)methanesulfonamide.** Secondary alcohol SI-35 (0.5 g, 2.1 mmol) was iodinated with molecular iodine (0.6 g, 2.2 mmol) following General Procedure E. The crude product was purified by flash chromatography using hexanes/ethyl acetate (7:1) to provide secondary iodide SI-46 as a white solid (54% Yield). **<sup>1</sup>H-NMR** (600 MHz, CDCl<sub>3</sub>): δ 7.33 (t, J = 7.8 Hz, 1H), 7.21-7.17 (m, 3H), 4.11 (dd, J = 13.8 Hz, 6.6 Hz, 1H), 4.02 (m, 1H), 3.88 (dd, J = 13.8 Hz, 8.4 Hz, 1H), 2.94 (s, 3H), 2.41 (s, 3H), 1.94 (d, J = 7.2 Hz, 3H). **<sup>13</sup>C-NMR** (100 MHz, CDCl<sub>3</sub>): δ 139.91, 138.82, 129.50, 129.43, 129.29, 125.28, 60.33, 37.58, 24.94, 23.26, 21.35. **IR** (Thin Film, cm<sup>-1</sup>): 2923, 1604, 1486, 1340, 1153, 1065, 966, 808, 690. **LRMS** (ESI): Calculated for [C<sub>11</sub>H<sub>16</sub>INO<sub>2</sub>SH]<sup>+</sup> 354.00, found 354.07.

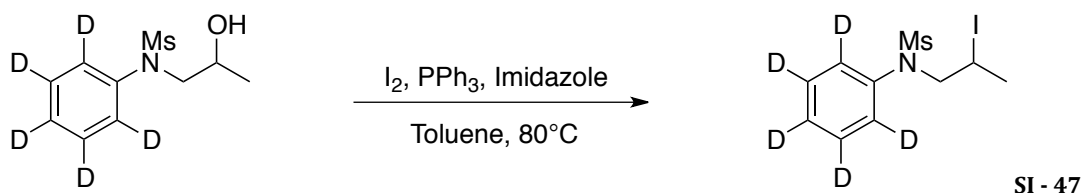

**(SI-47): N-(2-iodopropyl)-n-(perdeuterophenyl)methanesulfonamide.** Secondary alcohol SI-36 (1.0 g, 4.3 mmol) was iodinated with molecular iodine (1.1 g, 4.5 mmol) following General Procedure E. The crude product was purified by flash chromatography using hexanes/ethyl acetate (7:1) to provide secondary iodide SI-47 as a white solid (51% Yield). **<sup>1</sup>H-NMR** (600 MHz, CDCl<sub>3</sub>): δ 4.13 (dd, J = 13.8 Hz, 6.6 Hz, 1H), 4.02 (m, 1H), 3.90 (dd, J = 13.8 Hz, 8.4 Hz, 1H), 2.94 (s, 3H), 1.93 (d, J = 6.6 Hz, 3H). **<sup>13</sup>C-NMR** (100 MHz, CDCl<sub>3</sub>): δ 138.80, 129.46, 129.30, 129.13, 128.27, 128.11, 127.95, 60.28, 37.53, 24.92, 23.14. **IR** (Thin Film, cm<sup>-1</sup>): 2925, 2360, 1562, 1339, 1153, 1053, 968, 812, 762, 520. **LRMS** (ESI): Calculated for [C<sub>10</sub>H<sub>9</sub>D<sub>5</sub>INO<sub>2</sub>SH]<sup>+</sup> 345.02, found 344.97.

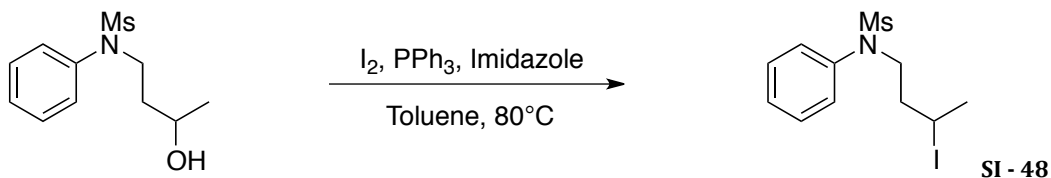

**(SI-48): N-(3-iodobutyl)-n-phenylmethanesulfonamide.** Secondary alcohol SI-37 (1.0 g, 4.1 mmol) was iodinated with molecular iodine (1.1 g, 4.3 mmol) following General Procedure E. The crude product was purified by flash chromatography using hexanes/ethyl acetate (9:1) to provide secondary iodide SI-48 as a white solid (64% Yield). **<sup>1</sup>H-NMR** (600 MHz, CDCl<sub>3</sub>): δ

7.45 (t,  $J = 7.2$  Hz, 2H), 7.38 (m, 3H), 4.19 (m, 1H), 3.88 (m, 1H), 3.79 (m, 1H), 2.91 (s, 3H), 2.04 (m, 1H), 1.93 (d,  $J = 6.6$  Hz, 3H), 1.89 (m, 1H).  $^{13}\text{C-NMR}$  (100 MHz,  $\text{CDCl}_3$ ):  $\delta$  139.08, 129.63, 128.32, 128.29, 51.09, 41.63, 36.83, 28.80, 24.53. **IR** (Thin Film,  $\text{cm}^{-1}$ ): 2922, 1491, 1339, 1151, 1078, 958, 766, 698, 542, 520. **LRMS** (ESI): Calculated for  $[\text{C}_{11}\text{H}_{16}\text{INO}_2\text{SH}]^+$  354.00, found 354.06.

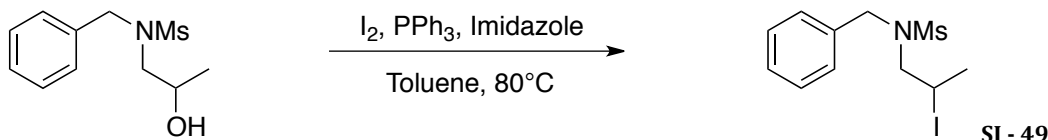

**(SI-49): N-benzyl-N-(2-iodopropyl)methanesulfonamide.** Secondary alcohol SI-38 (0.75 g, 3.1 mmol) was iodinated with molecular iodine (0.79 g, 3.2 mmol) following General Procedure E. The crude product was purified by flash chromatography using hexanes/ethyl acetate (7:1) to provide secondary iodide SI-49 as a white solid (84% Yield).  $^1\text{H-NMR}$  (600 MHz,  $\text{CDCl}_3$ ):  $\delta$  7.42-7.35 (m, 4H), 4.60 (d,  $J = 15.0$  Hz, 1H), 4.36 (d,  $J = 15.0$  Hz, 1H), 4.11 (m, 1H), 3.57 (dd,  $J = 15.0$  Hz, 7.2 Hz, 1H), 3.49 (dd,  $J = 14.4$  Hz, 7.8 Hz, 1H), 2.91 (s, 3H), 1.81 (d,  $J = 6.0$  Hz, 3H).  $^{13}\text{C-NMR}$  (100 MHz,  $\text{CDCl}_3$ ):  $\delta$  135.40, 128.94, 128.69, 128.40, 57.48, 52.69, 39.55, 25.18, 23.73. **IR** (Thin Film,  $\text{cm}^{-1}$ ): 2923, 1451, 1329, 1147, 1023, 962, 790, 700. **LRMS** (ESI): Calculated for  $[\text{C}_{11}\text{H}_{16}\text{INO}_2\text{SH}]^+$  354.00, found 354.07.

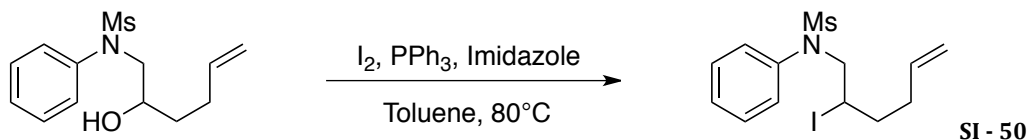

**(SI-50): N-(2-iodohex-5-enyl)-N-phenylmethanesulfonamide.** Secondary alcohol SI-26 (1.0 g, 3.7 mmol) was iodinated with molecular iodine (1.0 g, 3.9 mmol) following General Procedure E. The crude product was purified by flash chromatography using hexanes/ethyl acetate (9:1) to provide secondary iodide SI-50 as a white solid (57% Yield).  $^1\text{H-NMR}$  (600 MHz,  $\text{CDCl}_3$ ):  $\delta$  7.45 (m, 2H), 7.40 (m, 3H), 5.71 (m, 1H), 5.04 (m, 2H), 4.17 (dd,  $J = 13.8$  Hz, 6.0 Hz, 1H), 4.04 (dd,  $J = 13.8$  Hz, 8.4 Hz, 1H), 3.97 (m, 1H), 2.94 (s, 3H), 2.31 (m, 1H), 2.12 (m, 1H), 2.01 (m, 1H), 1.84 (m, 1H).  $^{13}\text{C-NMR}$  (100 MHz,  $\text{CDCl}_3$ ):  $\delta$  138.83, 136.38, 129.78, 128.61, 128.50, 115.94, 58.68, 37.40, 35.11, 33.13, 32.28. **IR** (Thin Film,  $\text{cm}^{-1}$ ): 2927, 1593, 1491, 1342, 1154, 962, 775, 697, 542. **LRMS** (ESI): Calculated for  $[\text{C}_{13}\text{H}_{18}\text{INO}_2\text{SNa}]^+$  402.25, found 402.23.

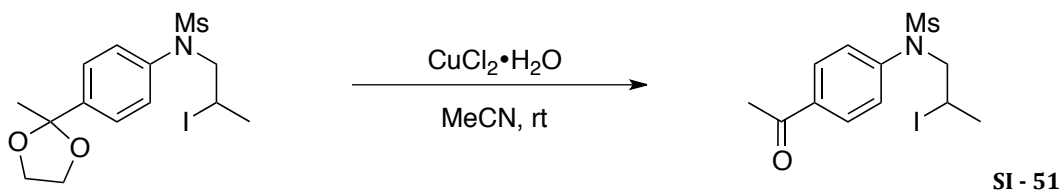

**(SI-51): N-(4-acetylphenyl)-n-(2-iodopropyl)methanesulfonamide.** To a solution of acetal SI-43 (1.2 g, 2.8 mmol) in acetonitrile (50 ml, 0.05 M) was added copper (II) chloride (0.97 g, 5.6 mmol). The reaction solution was stirred for 3 hours at room temperature before being quenched with water. The aqueous layer was extracted with Et<sub>2</sub>O (3x), and the combined aqueous layer was washed with brine, dried over MgSO<sub>4</sub>, filtered, and concentrated. The crude product was purified by flash chromatography using hexanes/ethyl acetate (1:1) to provide secondary iodide SI-51 as a white solid (89% Yield). **<sup>1</sup>H-NMR** (600 MHz, CDCl<sub>3</sub>): δ 8.01 (d, J = 8.4 Hz, 2H), 7.49 (d, J = 8.4 Hz, 2H), 4.13 (dd, J = 14.4 Hz, 6.6 Hz, 1H), 4.00 (m, 1H), 3.91 (dd, J = 14.4, 7.8 Hz, 1H), 2.93 (s, 3H), 2.61 (s, 3H), 1.89 (d, J = 7.2 Hz, 3H). **<sup>13</sup>C-NMR** (100 MHz, CDCl<sub>3</sub>): δ 197.32, 143.69, 137.04, 130.31, 128.58, 60.39, 38.40, 27.19, 25.47, 23.12. **IR** (Thin Film, cm<sup>-1</sup>): 2925, 1683, 1600, 1343, 1266, 1155, 963, 732, 599. **LRMS** (ESI): Calculated for [C<sub>12</sub>H<sub>16</sub>INO<sub>3</sub>SNa]<sup>+</sup> 404.22, found 404.23.

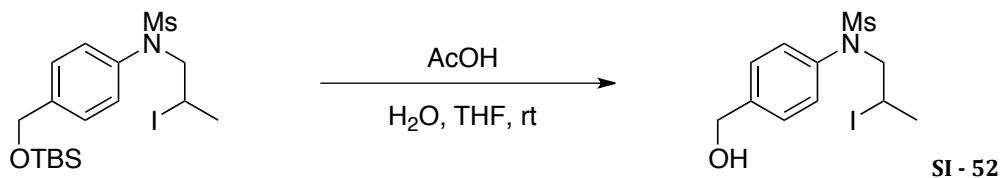

**(SI-52): N-(4-(hydroxymethyl)phenyl)-n-(2-iodopropyl)methanesulfonamide.** To a solution of acetic acid, water, and THF (3:1:1, 50 mL, 0.03 M) was added silyl ether SI-44 (0.75g, 1.5 mmol). The reaction mixture was stirred at room temperature for 15 hours before being quenched with NaHCO<sub>3</sub>. The aqueous layer was extracted with Et<sub>2</sub>O (3x), and the combined organic layer was washed with brine, dried over MgSO<sub>4</sub>, filtered, and concentrated. The crude product was purified by flash chromatography using hexanes/ethyl acetate (1:1) to provide secondary iodide SI-52 as a white solid (72% Yield). **<sup>1</sup>H-NMR** (600 MHz, CDCl<sub>3</sub>): δ 7.47 (d, J = 8.4 Hz, 2H), 7.41 (d, J = 8.4 Hz, 2H), 4.76 (s, 2H), 4.12 (dd, J = 13.8 Hz, 6.6 Hz, 1H), 4.02 (m, 1H), 3.88 (dd, J = 13.8 Hz, 8.4 Hz, 1H), 2.95 (s, 3H), 1.94 (d, J = 6.6 Hz, 3H), 1.75 (bs, 1H). **<sup>13</sup>C-NMR** (100 MHz, CDCl<sub>3</sub>): δ 141.37, 138.17, 128.65, 128.18, 64.54, 60.29, 37.58, 24.93, 23.04. **IR** (Thin Film, cm<sup>-1</sup>): 3516, 2924, 1509, 1336, 1152, 1056, 966, 731. **LRMS** (ESI): Calculated for [C<sub>11</sub>H<sub>16</sub>INO<sub>3</sub>SNa]<sup>+</sup> 392.21, found 392.29.

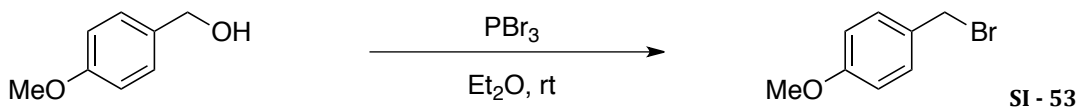

**(SI-53): 4-Methoxybenzyl bromide.** 4-Methoxybenzyl alcohol (10.0 g, 72.4 mmol) was brominated with phosphorus tribromide (3.6 mL, 38.1 mmol) following General Procedure F. The crude product was purified by flash chromatography using hexanes/ethyl acetate (19:1) to provide benzyl bromide SI-53 as a clear oil (88% Yield). All physical and spectroscopic data were in accordance with the literature data.

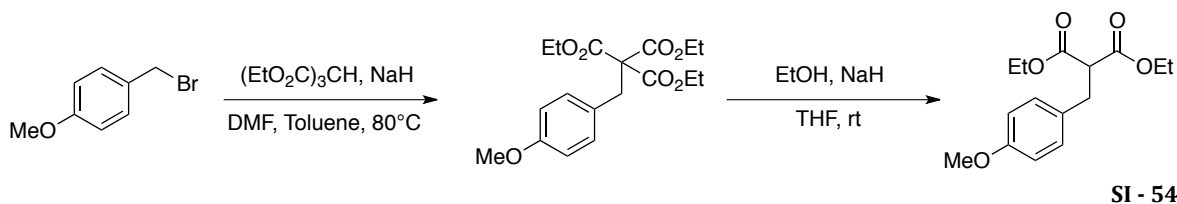

**(SI-54): Diethyl (4-methoxybenzyl)malonate.** Triethyl methanetricarboxylate (6.8 g, 29.4 mmol) was alkylated with (4-methoxybenzyl) bromide (6.0 g, 30.0 mmol) following General Procedure G. The crude intermediate was then decarboxylated without further purification following General Procedure H. The crude product was purified by flash chromatography using hexanes/ethyl acetate (7:1) to provide diethyl benzylmalonate SI-54 as a pale yellow oil (81% yield). All physical and spectroscopic data were in accordance with literature data.<sup>10</sup>

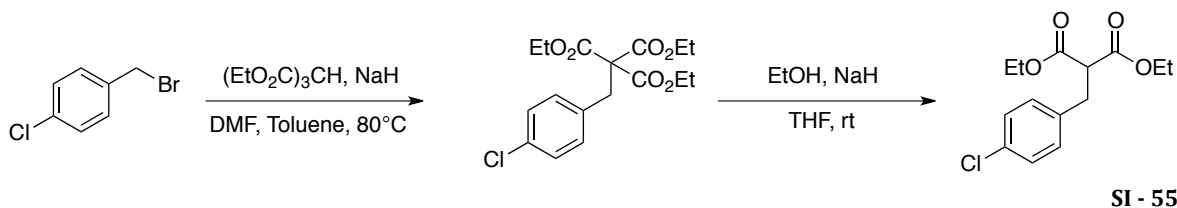

**(SI-55): Diethyl (4-chlorobenzyl)malonate.** Triethyl methanetricarboxylate (7.5 g, 32.2 mmol) was alkylated with 4-chlorobenzyl bromide (6.7 g, 32.8 mmol) following General Procedure G. The crude intermediate was then decarboxylated without further purification following General Procedure H. The crude product was purified by flash chromatography using hexanes/ethyl acetate (9:1) to provide diethyl benzylmalonate SI-55 as a pale yellow oil (71% yield). All physical and spectroscopic data were in accordance with literature data.<sup>11</sup>

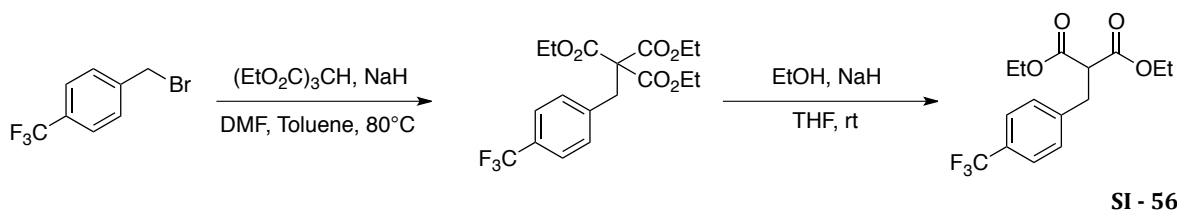

**(SI-56): Diethyl (4-trifluoromethylbenzyl)malonate.** Triethyl methanetricarboxylate (5.3 g, 22.7 mmol) was alkylated with 4-trifluoromethylbenzyl bromide (5.5 g, 23.2 mmol) following General Procedure G. The crude intermediate was then decarboxylated without further purification following General Procedure H. The crude product was purified by flash chromatography using hexanes/ethyl acetate (9:1) to provide diethyl benzylmalonate SI-56 as a pale yellow oil (80% yield). All physical and spectroscopic data were in accordance with literature data.<sup>10</sup>

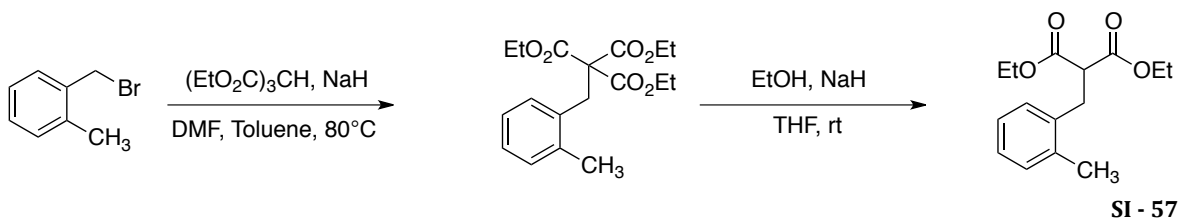

**(SI-57): Diethyl (2-methylbenzyl)malonate.** Triethyl methanetricarboxylate (8.6 g, 37.1 mmol) was alkylated with 2-methylbenzyl bromide (7.0 g, 37.8 mmol) following General Procedure G. The crude intermediate was then decarboxylated without further purification following General Procedure H. The crude product was purified by flash chromatography using hexanes/ethyl acetate (9:1) to provide diethyl benzylmalonate SI-57 as a pale yellow oil (78% yield). All physical and spectroscopic data were in accordance with literature data.<sup>12</sup>

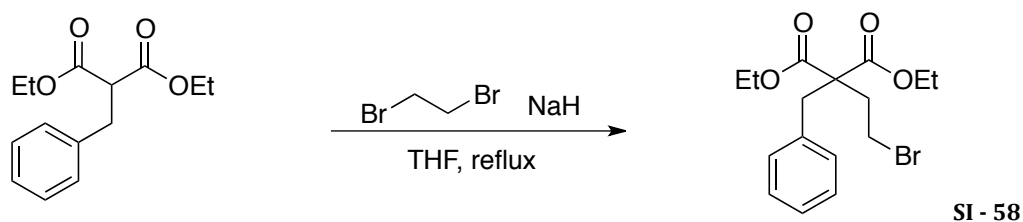

**(SI-58): Diethyl benzyl(2-bromoethyl)malonate.** Diethyl benzylmalonate (5.1 g, 20.4 mmol) was alkylated with dibromoethane (38.3 g, 204 mmol) following General Procedure I. The crude product was purified by flash chromatography using hexanes/ethyl acetate (9:1) to provide bromide SI-58 as a clear oil (64% yield). <sup>1</sup>H-NMR (600 MHz, CDCl<sub>3</sub>): δ 7.32-7.26 (m, 3H), 7.11 (d, J = 7.2 Hz, 2H), 4.24 (m, 4H), 3.41 (dd, J = 8.4 Hz, 8.4 Hz, 2H), 3.28 (s, 2H), 2.38 (dd, J = 8.4 Hz, 8.4 Hz, 2H), 1.29 (t, J = 7.1 Hz, 6H). <sup>13</sup>C-NMR (100 MHz, CDCl<sub>3</sub>): δ 170.24, 135.27, 129.83, 128.45, 127.23, 61.66, 61.64, 58.88, 39.22, 36.06, 27.23, 13.99. IR (Thin Film, cm<sup>-1</sup>): 2980, 1729, 1449, 1261, 1186, 1094, 1035, 861, 701. LRMS (ESI): Calculated for [C<sub>16</sub>H<sub>21</sub>BrO<sub>4</sub>H]<sup>+</sup> 357.07, found 357.15.

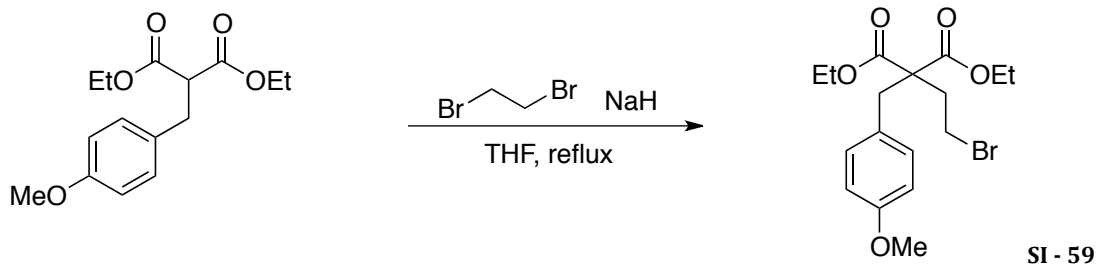

**(SI-59): Diethyl (2-bromoethyl)(4-methoxybenzyl)malonate.** Diethyl benzylmalonate SI-54 (6.1 g, 21.8 mmol) was alkylated with dibromoethane (40.9 g, 218 mmol) following General Procedure I. The crude product was purified by flash chromatography using hexanes/ethyl acetate (9:1) to provide bromide SI-59 as a clear oil (52% yield). **<sup>1</sup>H-NMR** (600 MHz, CDCl<sub>3</sub>): δ 7.02 (d, J = 8.6 Hz, 2H), 6.83 (d, J = 8.6 Hz, 2H), 4.23 (m, 4H), 3.80 (s, 3H), 3.40 (dd, J = 7.8 Hz, 7.2 Hz, 2H), 3.21 (s, 2H), 3.36 (dd, J = 7.8 Hz, 7.2 Hz, 2H), 1.29 (t, J = 7.1 Hz, 6H). **<sup>13</sup>C-NMR** (100 MHz, CDCl<sub>3</sub>): δ 170.32, 158.71, 130.84, 127.14, 113.84, 61.60, 58.98, 55.19, 55.16, 38.45, 36.07, 27.32, 14.01. **IR** (Thin Film, cm<sup>-1</sup>): 2979, 1729, 1612, 1512, 1445, 1248, 1181, 1033, 845. **LRMS** (ESI): Calculated for [C<sub>17</sub>H<sub>23</sub>BrO<sub>4</sub>H]<sup>+</sup> 387.08, found 387.01.

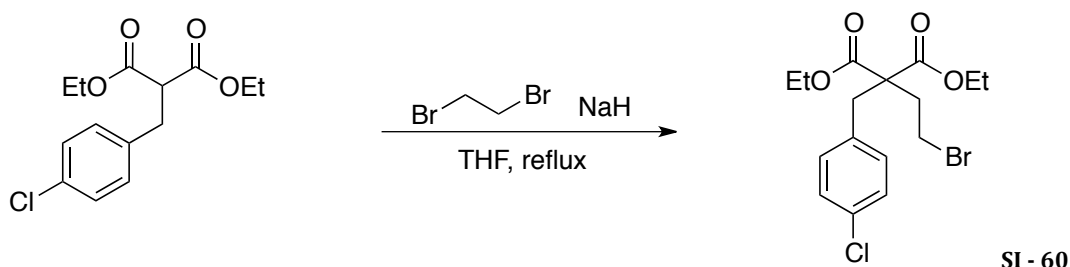

**(SI-60): Diethyl (2-bromoethyl)(4-chlorobenzyl)malonate.** Diethyl benzylmalonate SI-55 (2.5 g, 8.8 mmol) was alkylated with dibromoethane (16.5 g, 88 mmol) following General Procedure I. The crude product was purified by flash chromatography using hexanes/ethyl acetate (9:1) to provide bromide SI-60 as a clear oil (48% yield). **<sup>1</sup>H-NMR** (600 MHz, CDCl<sub>3</sub>): δ 7.27 (d, J = 8.4 Hz, 2H), 7.05 (d, J = 8.4 Hz, 2H), 4.23 (m, 4H), 3.39 (dd, J = 7.8 Hz, 7.8 Hz, 2H), 3.24 (s, 2H), 2.36 (dd, J = 7.8 Hz, 7.8 Hz, 2H), 1.28 (t, J = 7.2 Hz, 6H). **<sup>13</sup>C-NMR** (100 MHz, CDCl<sub>3</sub>): δ 170.03, 133.81, 133.21, 131.20, 128.62, 61.76, 58.80, 38.70, 36.24, 26.99, 13.99. **IR** (Thin Film, cm<sup>-1</sup>): 2981, 1729, 1491, 1446, 1261, 1186, 1095, 1015, 861. **LRMS** (ESI): Calculated for [C<sub>16</sub>H<sub>20</sub>BrClO<sub>4</sub>H]<sup>+</sup> 391.03, found 391.15.

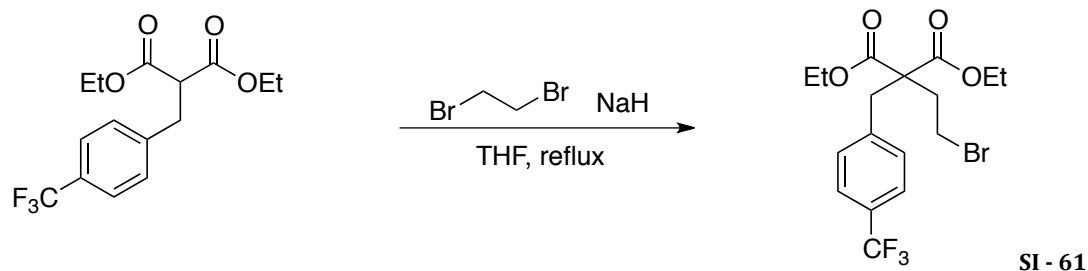

**(SI-61): Diethyl (2-bromoethyl)(4-trifluoromethylbenzyl)malonate.** Diethyl benzylmalonate SI-56 (1.5 g, 3.5 mmol) was alkylated with dibromoethane (1.6 g, 10.6 mmol) following General Procedure I. The crude product was purified by flash chromatography using hexanes/ethyl acetate (9:1) to provide bromide SI-61 as a clear oil (62% yield). **<sup>1</sup>H-NMR** (600 MHz, CDCl<sub>3</sub>): δ 7.56 (d, J = 8.4 Hz, 2H), 7.25 (d, J = 8.4 Hz), 4.22 (m, 4H), 3.40 (m, 2H), 3.32 (s, 2H), 2.37 (m, 2H), 1.27 (t, 7.2 Hz, 6H). **<sup>13</sup>C-NMR** (100 MHz, CDCl<sub>3</sub>): δ 169.90, 139.58, 130.26, 125.36, 125.33, 61.85, 58.76, 39.14, 36.37, 26.83, 13.95. **IR** (Thin Film, cm<sup>-1</sup>): 2983, 1730, 1619, 1448, 1326, 1165, 1120, 1019, 857. **LRMS** (ESI): Calculated for [C<sub>17</sub>H<sub>20</sub>BrF<sub>3</sub>O<sub>4</sub>H]<sup>+</sup> 425.06, found 425.14.

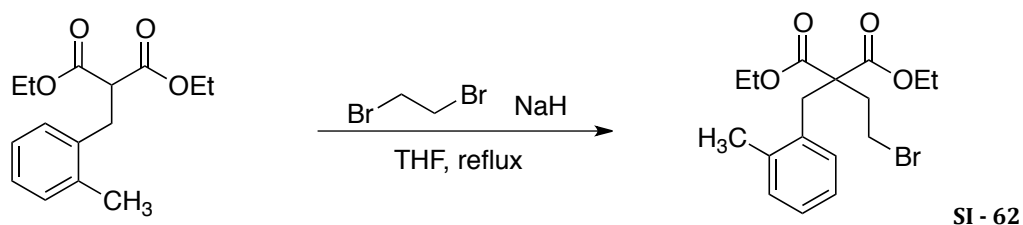

**(SI-62): Diethyl (2-bromoethyl)(2-methylbenzyl)malonate.** Diethyl benzylmalonate SI-57 (4.0 g, 15.1 mmol) was alkylated with dibromoethane (28.4 g, 151 mmol) following General Procedure I. The crude product was purified by flash chromatography using hexanes/ethyl acetate (9:1) to provide bromide SI-62 as a clear oil (73% yield). **<sup>1</sup>H-NMR** (600 MHz, CDCl<sub>3</sub>): δ 7.14 (m, 3H), 7.06 (d, J = 7.8 Hz, 1H), 4.21 (m, 4H), 3.39 (m, 2H), 3.35 (s, 2H), 2.42 (m, 2H), 2.34 (s, 3H), 1.26 (t, J = 7.2 Hz, 6H). **<sup>13</sup>C-NMR** (100 MHz, CDCl<sub>3</sub>): δ 170.57, 137.12, 134.03, 130.74, 129.82, 127.06, 125.90, 61.65, 58.98, 36.78, 35.64, 27.52, 19.97, 13.92. **IR** (Thin Film, cm<sup>-1</sup>): 2980, 1729, 1447, 1245, 1217, 1159, 1054, 862, 742. **LRMS** (ESI): Calculated for [C<sub>17</sub>H<sub>23</sub>BrO<sub>4</sub>H]<sup>+</sup> 371.09, found 371.12.

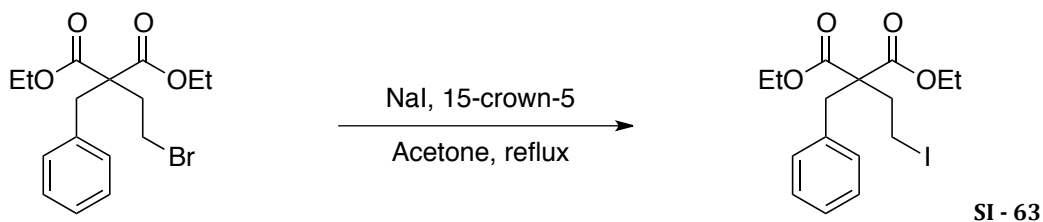

**(SI-63): Diethyl benzyl(2-iodoethyl)malonate.** Primary bromide SI-58 (3.0 g, 8.4 mmol) was iodinated with sodium iodide (3.8 g, 25.2 mmol) following General Procedure J. The crude product was purified by flash chromatography using hexanes/ethyl acetate (9:1) to provide iodide SI-63 as a clear oil (85% yield). **<sup>1</sup>H-NMR** (600 MHz, CDCl<sub>3</sub>): δ 7.29 (m, 3H), 7.10 (d, J = 6.6 Hz, 2H), 4.32 (m, 4H), 3.26 (s, 2H), 3.15 (m, 2H), 2.42 (m, 2H), 1.29 (t, J = 7.2 Hz, 6H). **<sup>13</sup>C-NMR** (100 MHz, CDCl<sub>3</sub>): δ 170.10, 135.31, 129.78, 128.47, 127.23, 61.62, 60.46, 38.82, 37.46, 14.02, -2.32. **IR** (Thin Film, cm<sup>-1</sup>): 2980, 1728, 1611, 1512, 1248, 1181, 1030, 842. **LRMS** (ESI): Calculated for [C<sub>16</sub>H<sub>21</sub>IO<sub>4</sub>H]<sup>+</sup> 405.06, found 405.20.

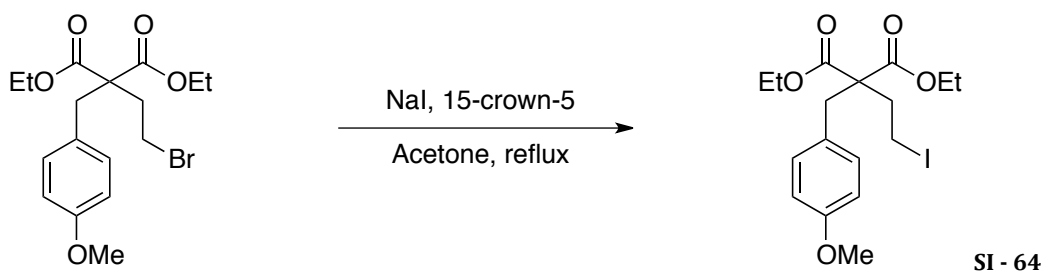

**(SI-64): Diethyl (2-iodoethyl)(4-methoxybenzyl)malonate.** Primary bromide SI-59 (1.8 g, 4.7 mmol) was iodinated with sodium iodide (2.1 g, 14.1 mmol) following General Procedure J. The crude product was purified by flash chromatography using hexanes/ethyl acetate (9:1) to provide iodide SI-64 as a clear oil (45% yield). **<sup>1</sup>H-NMR** (600 MHz, CDCl<sub>3</sub>): δ 7.00 (d, J = 9.0 Hz, 2H), 6.83 (d, J = 9.0 Hz, 2H), 4.22 (m, 4H), 3.80 (s, 3H), 3.19 (s, 2H), 3.14 (m, 2H), 2.40 (m, 2H), 1.28 (t, J = 7.2 Hz, 6H). **<sup>13</sup>C-NMR** (100 MHz, CDCl<sub>3</sub>): δ 170.17, 158.70, 130.78, 127.16, 113.85, 61.56, 60.54, 55.18, 38.04, 37.46, 14.04, -2.18. **IR** (Thin Film, cm<sup>-1</sup>): 2980, 1769, 1728, 1611, 1512, 1445, 1248, 1180, 1029, 839. **LRMS** (ESI): Calculated for [C<sub>17</sub>H<sub>23</sub>IO<sub>5</sub>H]<sup>+</sup> 435.07, found 435.07.

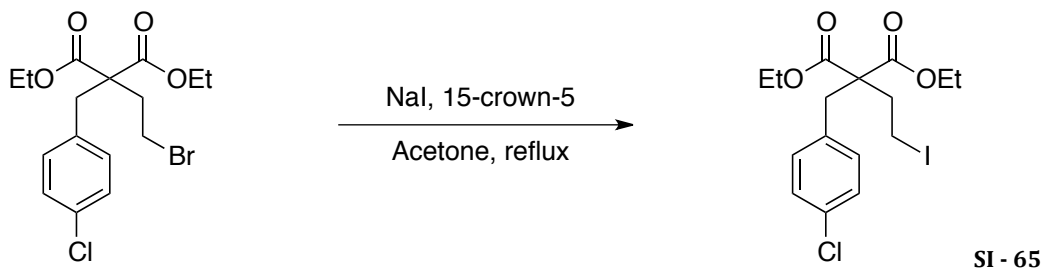

**(SI-65): Diethyl (4-chlorobenzyl)(2-iodoethyl)malonate.** Primary bromide SI-60 (1.0 g, 2.6 mmol) was iodinated with sodium iodide (1.2 g, 7.7 mmol) following General Procedure J. The crude product was purified by flash chromatography using hexanes/ethyl acetate (9:1) to provide iodide SI-65 as a clear oil (58% yield). **<sup>1</sup>H-NMR** (600 MHz, CDCl<sub>3</sub>): δ 7.26 (d, J = 6.0 Hz, 2H), 7.03 (d, J = 6.0 Hz, 2H), 4.21 (m, 4H), 3.21 (s, 2H), 3.12 (m, 2H), 2.39 (m, 2H), 1.27 (t, J = 7.2 Hz, 6H). **<sup>13</sup>C-NMR** (100 MHz, CDCl<sub>3</sub>): δ 169.85, 133.82, 133.17, 131.12, 128.60, 61.71,



60.34, 38.28, 37.64, 14.00, -2.67. **IR** (Thin Film,  $\text{cm}^{-1}$ ): 2981, 1773, 1728, 1491, 1186, 1094, 1028, 859. **LRMS** (ESI): Calculated for  $[\text{C}_{16}\text{H}_{20}\text{ClIO}_4\text{H}]^+$  439.02, found 438.96.

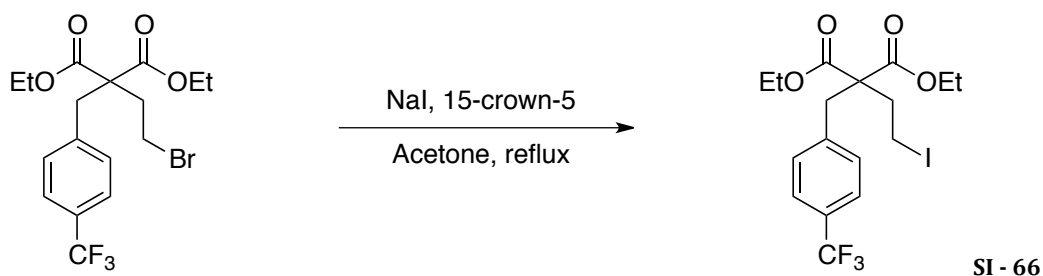

**(SI-66): Diethyl (2-iodoethyl)(4-trifluoromethylbenzyl)malonate.** Primary bromide SI-61 (1.5 g, 3.5 mmol) was iodinated with sodium iodide (1.6 g, 10.6 mmol) following General Procedure J. The crude product was purified by flash chromatography using hexanes/ethyl acetate (9:1) to provide iodide SI-66 as a clear oil (62% yield).  **$^1\text{H-NMR}$**  (600 MHz,  $\text{CDCl}_3$ ):  $\delta$  7.56 (d,  $J = 8.4$  Hz, 2H), 7.23 (d,  $J = 8.4$  Hz, 2H), 4.22 (m, 4H), 3.30 (s, 2H), 3.13 (m, 2H), 2.41 (m, 2H), 1.26 (t,  $J = 7.2$  Hz, 6H).  **$^{13}\text{C-NMR}$**  (100 MHz,  $\text{CDCl}_3$ ):  $\delta$  169.73, 139.60, 130.20, 125.35, 125.32, 61.80, 60.31, 38.72, 37.79, 13.96, -2.92. **IR** (Thin Film,  $\text{cm}^{-1}$ ): 3468, 2983, 1729, 1619, 1447, 1326, 1263, 1165, 1119, 1067, 1021, 858. **LRMS** (ESI): Calculated for  $[\text{C}_{17}\text{H}_{20}\text{F}_3\text{IO}_4\text{H}]^+$  473.05, found 473.17.

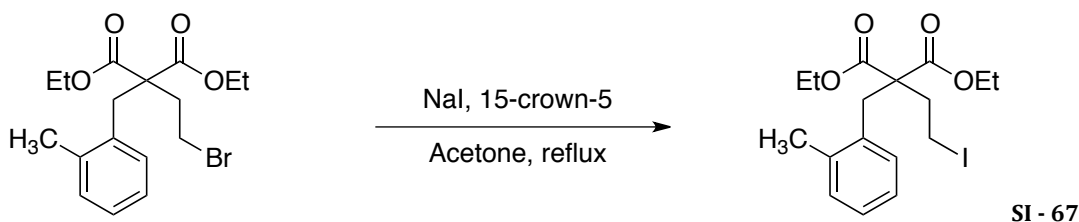

**(SI-67): Diethyl (2-iodoethyl)(2-methylbenzyl)malonate.** Primary bromide SI-62 (3.0 g, 8.1 mmol) was iodinated with sodium iodide (3.6 g, 24.2 mmol) following General Procedure J. The crude product was purified by flash chromatography using hexanes/ethyl acetate (9:1) to provide iodide SI-67 as a clear oil (74% yield).  **$^1\text{H-NMR}$**  (600 MHz,  $\text{CDCl}_3$ ):  $\delta$  7.13 (m, 3H), 7.05 (d,  $J = 7.2$  Hz, 1H), 4.21 (m, 4H), 3.33 (s, 2H), 3.14 (m, 2H), 2.47 (m, 2H), 2.33 (s, 3H), 1.25 (t,  $J = 7.2$  Hz, 6H).  **$^{13}\text{C-NMR}$**  (100 MHz,  $\text{CDCl}_3$ ):  $\delta$  170.41, 137.08, 134.04, 130.72, 129.84, 127.04, 125.88, 61.59, 60.42, 38.23, 35.29, 19.89, 13.92, -1.82. **IR** (Thin Film,  $\text{cm}^{-1}$ ): 2979, 1729, 1447, 1237, 1194, 1035, 862, 747. **LRMS** (ESI): Calculated for  $[\text{C}_{17}\text{H}_{23}\text{IO}_4\text{H}]^+$  419.07, found 419.18.

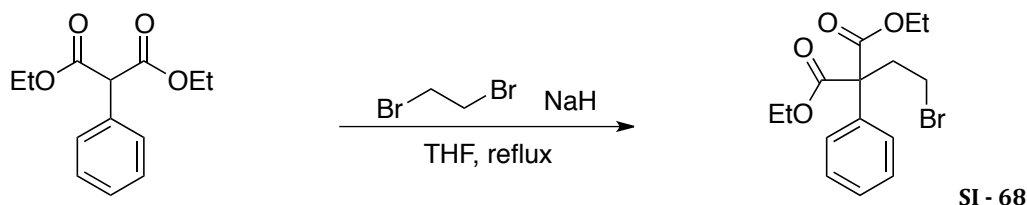

**(SI-68): Diethyl (2-bromoethyl)phenylmalonate.** Diethyl phenylmalonate (5.9 g, 25.0 mmol) was alkylated with dibromoethane (47.0 g, 250 mmol) following General Procedure I. The crude product was purified by flash chromatography using hexanes/ethyl acetate (9:1) to provide bromide SI-68 as a clear oil (59% yield). **<sup>1</sup>H-NMR** (600 MHz, CDCl<sub>3</sub>): δ 7.37 (m, 5H), 4.28 (m, 4H), 3.30 (m, 2H), 2.87 (m, 2H), 1.28 (t, J = 6.6 Hz, 6H). **<sup>13</sup>C-NMR** (100 MHz, CDCl<sub>3</sub>): δ 169.83, 135.87, 128.49, 127.90, 127.70, 62.96, 61.99, 39.54, 27.66, 13.96. **IR** (Thin Film, cm<sup>-1</sup>): 2982, 1732, 1447, 1252, 1094, 1026, 860, 698. **LRMS** (ESI): Calculated for [C<sub>15</sub>H<sub>19</sub>BrO<sub>4</sub>H]<sup>+</sup> 343.06, found 343.09.

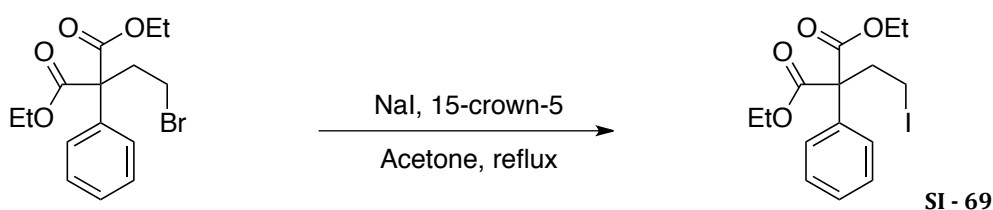

**(SI-69): Diethyl (2-iodoethyl)phenylmalonate.** Primary bromide SI-68 (3.0 g, 8.7 mmol) was iodinated with sodium iodide (3.9 g, 26.1 mmol) following General Procedure J. The crude product was purified by flash chromatography using hexanes/ethyl acetate (9:1) to provide iodide SI-69 as a clear oil (65% yield). **<sup>1</sup>H-NMR** (600 MHz, CDCl<sub>3</sub>): δ 7.35 (m, 5H), 4.27 (m, 4H), 3.07 (m, 2H), 2.90 (m, 2H), 1.28 (t, J = 7.2 Hz, 6H). **<sup>13</sup>C-NMR** (100 MHz, CDCl<sub>3</sub>): δ 169.67, 135.74, 128.45, 127.83, 127.71, 64.37, 61.92, 41.05, 13.94, -1.44. **IR** (Thin Film, cm<sup>-1</sup>): 2979, 1775, 1727, 1448, 1371, 1214, 1162, 1024, 698. **LRMS** (ESI): Calculated for [C<sub>15</sub>H<sub>19</sub>IO<sub>4</sub>H]<sup>+</sup> 391.04, found 391.07.

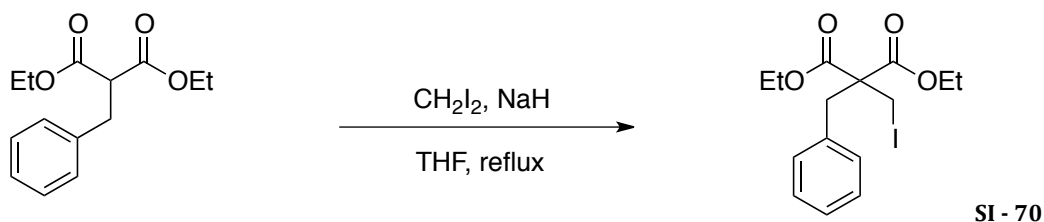

**(SI-70): Diethyl benzyl(iodomethyl)malonate.** Diethyl benzylmalonate (1.5 g, 5.8 mmol) was alkylated with diiodomethane (3.1 g, 11.6 mmol) following General Procedure K. The crude product was purified by flash chromatography using hexanes/ethyl acetate (9:1) to provide iodide SI-70 as a clear oil (68% yield). **<sup>1</sup>H-NMR** (600 MHz, CDCl<sub>3</sub>): δ 7.28 (m, 3H), 7.20

(m, 2H), 4.24 (m, 4H), 3.47 (s, 2H), 3.39 (s, 2H), 1.28 (t, J = 7.2 Hz, 6H).  $^{13}\text{C-NMR}$  (100 MHz,  $\text{CDCl}_3$ ):  $\delta$  168.20, 135.18, 129.58, 128.50, 127.38, 62.06, 59.41, 37.97, 14.01, 7.08. **IR** (Thin Film,  $\text{cm}^{-1}$ ): 2981, 1734, 1443, 1271, 1183, 1032, 862, 741, 702. **LRMS** (ESI): Calculated for  $[\text{C}_{15}\text{H}_{19}\text{IO}_4\text{H}]^+$  391.04, found 391.15.

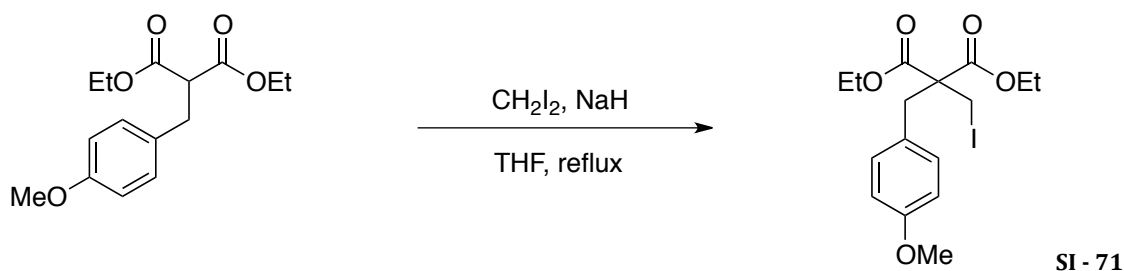

**(SI-71): Diethyl (iodomethyl)(4-methoxybenzyl)malonate.** Diethyl benzylmalonate (4.5 g, 16.2 mmol) was alkylated with diiodomethane (8.6 g, 32.3 mmol) following General Procedure K. The crude product was purified by flash chromatography using hexanes/ethyl acetate (9:1) to provide iodide SI-71 as a clear oil (60% yield).  $^1\text{H-NMR}$  (600 MHz,  $\text{CDCl}_3$ ):  $\delta$  7.12 (d, J = 8.4 Hz, 2H), 6.83 (d, J = 8.4 Hz, 2H), 4.23 (m, 4H), 3.79 (s, 3H), 3.47 (s, 2H), 3.34 (s, 2H), 1.29 (t, J = 7.2 Hz, 6H).  $^{13}\text{C-NMR}$  (100 MHz,  $\text{CDCl}_3$ ):  $\delta$  168.25, 158.85, 130.58, 127.01, 113.87, 61.98, 59.41, 55.13, 37.17, 14.01, 7.16. **IR** (Thin Film,  $\text{cm}^{-1}$ ): 2981, 2835, 1732, 1612, 1512, 1453, 1249, 1182, 1104, 1032, 948, 575. **LRMS** (ESI): Calculated for  $[\text{C}_{16}\text{H}_{21}\text{IO}_5\text{H}]^+$  421.05, found 421.09.

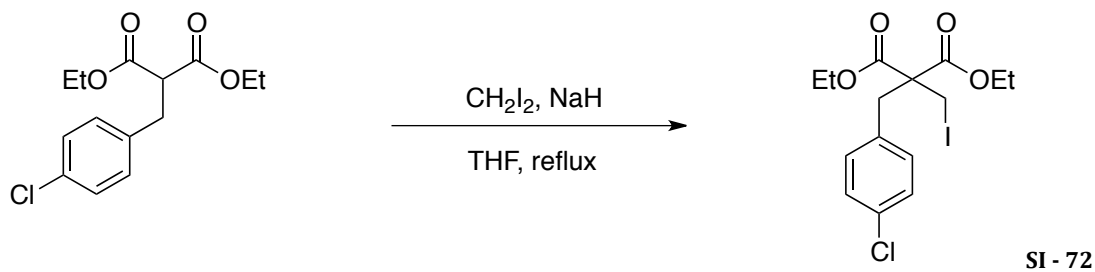

**(SI-72): Diethyl (4-chlorobenzyl)(iodomethyl)malonate.** Diethyl benzylmalonate (2.0 g, 7.0 mmol) was alkylated with diiodomethane (3.5 g, 14.0 mmol) following General Procedure K. The crude product was purified by flash chromatography using hexanes/ethyl acetate (9:1) to provide iodide SI-72 as a clear oil (85% yield).  $^1\text{H-NMR}$  (600 MHz,  $\text{CDCl}_3$ ):  $\delta$  7.27 (d, J = 8.4 Hz, 2H), 7.15 (d, J = 8.4 Hz, 2H), 4.27 (m, 4H), 3.45 (s, 2H), 3.37 (s, 2H), 1.29 (t, J = 7.2 Hz).  $^{13}\text{C-NMR}$  (100 MHz,  $\text{CDCl}_3$ ):  $\delta$  168.01, 133.71, 133.37, 130.96, 128.69, 62.19, 59.31, 37.45, 14.02, 6.81. **IR** (Thin Film,  $\text{cm}^{-1}$ ): 2981, 1732, 1491, 1267, 1182, 1096, 1033, 851, 828, 576. **LRMS** (ESI): Calculated for  $[\text{C}_{15}\text{H}_{18}\text{ClIO}_4\text{H}]^+$  425.00, found 425.06.

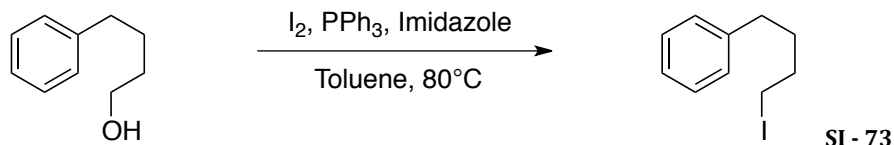

**(SI-73): (4-iodobutyl)benzene.** 4-Phenyl-1-butanol (2.0 g, 13.3 mmol) was iodinated with molecular iodine (3.6 g, 14.0 mmol) following General Procedure E. The crude product was purified by flash chromatography using hexanes/ethyl acetate (20:1) to provide primary iodide SI-73 as a clear oil (52% Yield). All physical and spectroscopic data were in accordance with the literature data.<sup>13</sup>

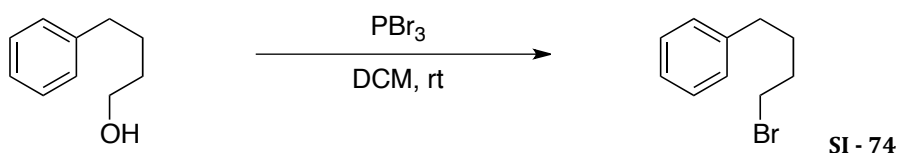

**(SI-74): (4-bromobutyl)benzene.** 4-Phenyl-1-Butanol (2.0 g, 13.3 mmol) was brominated with phosphorus tribromide (0.7 mL, 6.7 mmol) following General Procedure F. The crude product was purified by flash chromatography using hexanes/ethyl acetate (40:1) to provide primary bromide SI-74 as a clear oil (57% Yield). All physical and spectroscopic data were in accordance with the literature data.<sup>14</sup>

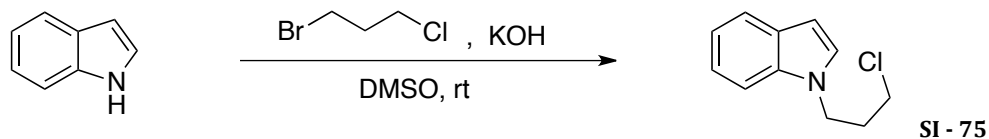

**(SI-75): N-(3-chloropropyl)indole.** Indole (3.0 g, 25.6 mmol) was alkylated with 1-bromo-3-chloropropane (12.1 g, 76.8 mmol) following General Procedure M. The crude product was purified by flash chromatography using hexanes/ethyl acetate (9:1) to provide chloride SI-75 as a clear oil (72% yield). **<sup>1</sup>H-NMR** (600 MHz, CDCl<sub>3</sub>): δ 7.66 (d, J = 7.8 Hz, 1H), 7.40 (d, J = 8.4 Hz, 1H), 7.24 (t, J = 7.2 Hz, 1H), 7.15 (m, 2H), 6.53 (d, J = 3.0 Hz, 1H), 4.38 (t, J = 6.6 Hz, 2H), 3.48 (t, J = 6.0 Hz, 2H), 2.30 (t, J = 6.6 Hz, 2H). **<sup>13</sup>C-NMR** (100 MHz, CDCl<sub>3</sub>): δ 128.68, 128.03, 121.62, 121.07, 119.47, 109.22, 101.48, 42.83, 41.86, 32.59. **IR** (Thin Film, cm<sup>-1</sup>): 2943, 1711, 1610, 1463, 1362, 1239, 1161, 740, 651. **LRMS** (ESI): Calculated for [C<sub>11</sub>H<sub>12</sub>ClNH]<sup>+</sup> 196.08, found 196.11.

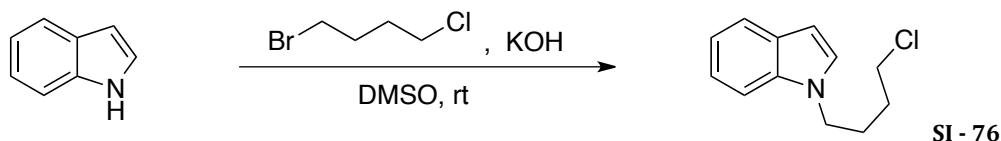

**(SI-76): N-(4-chlorobutyl)indole.** Indole (3.0 g, 25.6 mmol) was alkylated with 1-bromo-4-chlorobutane (13.3 g, 76.8 mmol) following General Procedure M. The crude product was purified by flash chromatography using hexanes/ethyl acetate (9:1) to provide chloride SI-76 as a clear oil (61% yield). **<sup>1</sup>H-NMR** (600 MHz, CDCl<sub>3</sub>): δ 7.66 (d, J = 7.8 Hz, 1H), 7.37 (d, J = 8.4 Hz, 1H), 7.24 (t, J = 7.8 Hz, 1H), 7.13 (m, 2H), 6.53 (d, J = 3.0 Hz, 1H), 4.20 (t, J = 6.6 Hz, 2H), 3.54 (t, J = 6.0 Hz, 2H), 2.05 (m, 2H), 1.80 (m, 2H). **<sup>13</sup>C-NMR** (100 MHz, CDCl<sub>3</sub>): δ 135.88, 128.60, 127.59, 121.50, 121.04, 119.33, 109.22, 101.28, 45.61, 44.43, 29.84, 27.60. **IR** (Thin Film, cm<sup>-1</sup>): 3420, 2955, 2360, 1637, 1462, 1314, 781, 739. **LRMS** (ESI): Calculated for [C<sub>12</sub>H<sub>14</sub>ClNH]<sup>+</sup> 208.09, found 208.14.

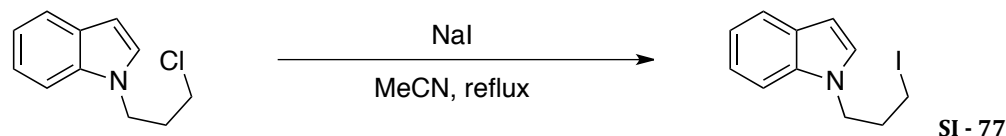

**(SI-77): N-(3-iodopropyl)indole.** Primary chloride SI-75 (2.5 g, 12.9 mmol) was iodinated with sodium iodide (8.7 g, 58.1 mmol) following General Procedure M. The crude product was purified by flash chromatography using hexanes/ethyl acetate (20:1) to provide iodide SI-77 as a white powder (59% yield). **<sup>1</sup>H-NMR** (600 MHz, CDCl<sub>3</sub>): δ 7.68 (d, J = 7.8 Hz, 1H), 7.42 (d, J = 8.4 Hz, 1H), 7.27 (m, 1H), 7.17 (m, 1H), 6.55 (d, J = 3.0 Hz, 1H), 4.31 (t, J = 6.0 Hz, 2H), 3.10 (t, J = 6.0 Hz, 2H), 2.34 (m, 2H). **<sup>13</sup>C-NMR** (100 MHz, CDCl<sub>3</sub>): δ 135.84, 128.75, 128.00, 121.68, 121.14, 119.55, 109.34, 101.59, 46.10, 33.42, 3.24. **IR** (Thin Film, cm<sup>-1</sup>): 3049, 2935, 1510, 1461, 1314, 1209, 1166, 745. **LRMS** (ESI): Calculated for [C<sub>11</sub>H<sub>12</sub>INH]<sup>+</sup> 286.01, found 286.09.

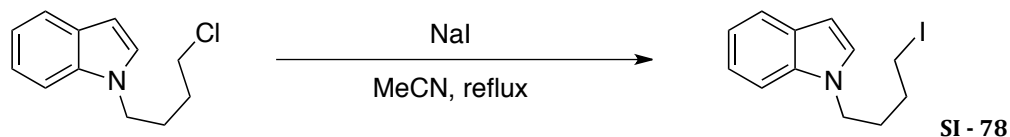

**(SI-78): N-(4-iodobutyl)indole.** Primary chloride SI-76 (2.5 g, 12.0 mmol) was iodinated with sodium iodide (8.1 g, 54.2 mmol) following General Procedure M. The crude product was purified by flash chromatography using hexanes/ethyl acetate (20:1) to provide iodide SI-78 as a clear oil (66% yield). **<sup>1</sup>H-NMR** (600 MHz, CDCl<sub>3</sub>): δ 7.67 (d, J = 8.4 Hz, 1H), 7.37 (d, J = 8.4 Hz, 1H), 7.25 (t, J = 8.4 Hz, 1H), 7.15 (t, J = 7.2 Hz, 1H), 7.11 (d, J = 3.0 Hz, 1H), 6.54 (t, J = 3.0 Hz, 1H). **<sup>13</sup>C-NMR** (100 MHz, CDCl<sub>3</sub>): δ 135.83, 128.57, 127.56, 121.49, 121.02, 119.32, 109.21, 101.29, 45.25, 31.08, 30.62, 5.76. **IR** (Thin Film, cm<sup>-1</sup>): 3049, 2935, 1509, 1462, 1315, 1237, 1203, 1167, 741. **LRMS** (ESI): Calculated for [C<sub>12</sub>H<sub>14</sub>I<sub>1</sub>NH]<sup>+</sup> 300.03, found 300.11.

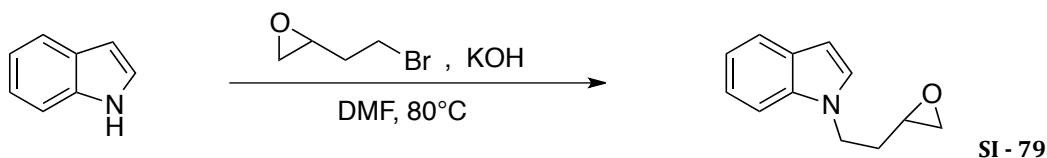

**(SI-79): N-(3,4-epoxybutyl)indole.** Indole (6.0 g, 51 mmol) was alkylated with (2-bromoethyl)oxirane (5.2 g, 56 mmol) following General Procedure L. The crude product was purified by flash chromatography using hexanes/ethyl acetate (9:1) to provide epoxide SI-79 as a clear oil (45% yield). **<sup>1</sup>H-NMR** (600 MHz, CDCl<sub>3</sub>): δ 7.66 (d, J = 7.6 Hz, 1H), 7.40 (d, 8.0 Hz, 1H), 7.25 (t, J = 7.6 Hz, 1H), 7.15 (m, 2H), 6.54 (d, J = 3.2 Hz, 1H), 3.45 (m, 2H), 2.90 (m, 1H), 2.76 (m, 1H), 2.42 (m, 1H), 2.22 (m, 1H), 1.92 (m, 1H). **<sup>13</sup>C-NMR** (100 MHz, CDCl<sub>3</sub>): δ 136.35, 128.58, 128.25, 121.81, 119.66, 109.27, 101.94. **IR** (Thin Film, cm<sup>-1</sup>): 3053, 2924, 1511, 1462, 1316, 1255, 1201, 909, 850, 743. **LRMS** (ESI): Calculated for [C<sub>12</sub>H<sub>13</sub>NOH]<sup>+</sup> 174.13, found 174.03.

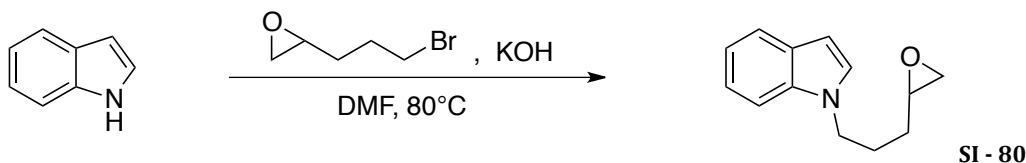

**(SI-80): N-(4,5-epoxypentyl)indole.** Indole (2.3 g, 20.0 mmol) was alkylated with (4-bromopropyl)oxirane (3.6 g, 22.0 mmol) following General Procedure L. The crude product was purified by flash chromatography using hexanes/ethyl acetate (7:1) to provide epoxide SI-80 as a clear oil (52% yield). **<sup>1</sup>H-NMR** (600 MHz, CDCl<sub>3</sub>): δ 7.65 (d, J = 7.8 Hz, 1H), 7.37 (d, J = 8.4 Hz, 1H), 7.23 (t, J = 6.6 Hz, 1H), 7.13 (m, 2H), 6.52 (d, J = 3.0 Hz, 1H), 4.23 (m, 2H), 2.93 (m, 1H), 2.76 (m, 1H), 2.48 (m, 1H), 2.06-2.02 (m, 2H), 1.75-1.68 (m, 1H), 1.52-1.46 (m, 1H). **<sup>13</sup>C-NMR** (100 MHz, CDCl<sub>3</sub>): δ 135.87, 128.59, 127.74, 121.43, 120.99, 119.27, 109.27, 101.14, 51.77, 46.77, 45.88, 29.67, 26.80. **IR** (Thin Film, cm<sup>-1</sup>): 2938, 1509, 1462, 1315, 1183, 918, 837, 741. **LRMS** (ESI): Calculated for [C<sub>13</sub>H<sub>15</sub>NOH]<sup>+</sup> 202.13, found 202.12.

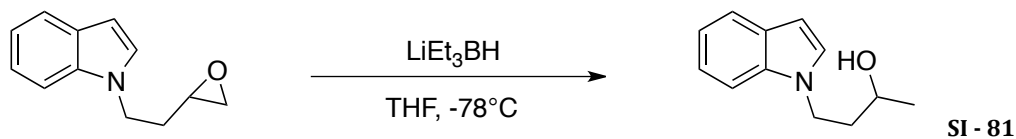

**(SI-81): N-(3-hydroxybutyl)indole.** Following General Procedure D, epoxide SI-79 (1.6 g, 8.9 mmol) was reduced with super hydride (1M in THF, 10.7 mL, 10.7 mmol). The crude product was purified by flash chromatography using hexanes/ethyl acetate (5:1) to provide secondary alcohol SI-81 as a clear oil (79% Yield). **<sup>1</sup>H-NMR** (600 MHz, CDCl<sub>3</sub>): δ 7.64 (d, J = 8.0 Hz, 1H),

7.38 (d,  $J = 8.0$  Hz, 1H), 4.19 (m, 2H), 3.82 (m, 1H), 2.01 (m, 1H), 1.93 (m, 1H), 1.19 (d,  $J = 6.0$  Hz, 3H).  $^{13}\text{C-NMR}$  (100 MHz,  $\text{CDCl}_3$ ):  $\delta$  136.26, 128.61, 128.48, 121.64, 121.00, 119.51, 109.47, 101.56, 67.25, 60.38, 53.79, 20.44. **IR** (Thin Film,  $\text{cm}^{-1}$ ): 3381, 2970, 1511, 1461, 1314, 1206, 1081, 938, 837, 741. **LRMS** (ESI): Calculated for  $[\text{C}_{12}\text{H}_{15}\text{NOH}]^+$  189.12, found 189.05.

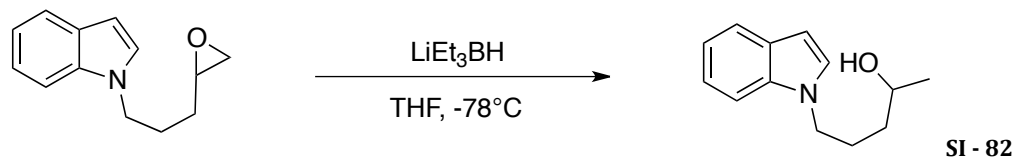

**(SI-82): N-(4-hydroxypentyl)indole.** Following General Procedure D, epoxide SI-80 (2.0 g, 9.9 mmol) was reduced with super hydride (1M in THF, 11.9 mL, 11.9 mmol). The crude product was purified by flash chromatography using hexanes/ethyl acetate (1:1) to provide secondary alcohol SI-82 as a clear oil (70% Yield).  $^1\text{H-NMR}$  (600 MHz,  $\text{CDCl}_3$ ):  $\delta$  7.65 (d,  $J = 7.8$  Hz, 1H), 7.37 (d,  $J = 8.4$  Hz, 1H), 7.23 (t,  $J = 6.6$  Hz, 1H), 7.13 (m, 2H), 6.51 (d,  $J = 3.0$  Hz, 1H), 4.19 (m, 2H), 3.82 (m, 1H), 2.01 (m, 1H), 1.92 (m, 1H), 1.19 (d,  $J = 6.0$  Hz, 3H).  $^{13}\text{C-NMR}$  (100 MHz,  $\text{CDCl}_3$ ):  $\delta$  143.12, 135.80, 128.63, 127.69, 121.23, 119.00, 109.07, 101.03, 67.75, 67.02, 46.10, 23.73. **IR** (Thin Film,  $\text{cm}^{-1}$ ): 3388, 2965, 1702, 1464, 1368, 1133, 741. **LRMS** (ESI): Calculated for  $[\text{C}_{13}\text{H}_{17}\text{NOH}]^+$  204.14, found 204.23.

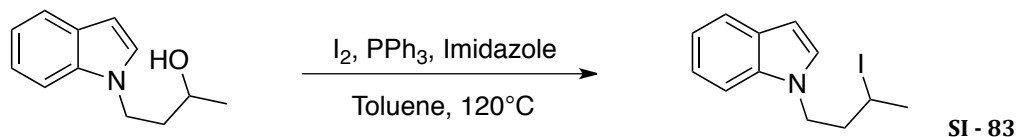

**(SI-83): N-(3-iodobutyl)indole.** Secondary alcohol SI-81 (1.21 g, 6.9 mmol) was iodinated with molecular iodine (1.84 g, 7.2 mmol) following General Procedure E. The crude product was purified by flash chromatography using hexanes/ethyl acetate (20:1) to provide secondary iodide SI-83 as a clear oil (89% Yield).  $^1\text{H-NMR}$  (600 MHz,  $\text{CDCl}_3$ ):  $\delta$  7.66 (d,  $J = 7.2$  Hz, 1H), 7.42 (d,  $J = 8.4$  Hz, 1H), 7.24 (t,  $J = 7.2$  Hz, 1H), 7.14 (m, 2H), 6.52 (d,  $J = 3.0$  Hz, 1H), 4.40 (m, 1H), 4.29 (m, 1H), 3.97 (m, 1H), 2.24 (m, 1H), 2.14 (m, 1H), 1.95 (d,  $J = 6.6$  Hz, 3H).  $^{13}\text{C-NMR}$  (100 MHz,  $\text{CDCl}_3$ ):  $\delta$  132.15, 132.09, 127.94, 121.63, 121.10, 119.49, 109.35, 101.47, 46.61, 42.61, 29.10, 26.28. **IR** (Thin Film,  $\text{cm}^{-1}$ ): 3051, 2921, 1460, 1315, 1192, 1116, 741. **LRMS** (ESI): Calculated for  $[\text{C}_{12}\text{H}_{14}\text{INH}]^+$  300.03, found 300.05.

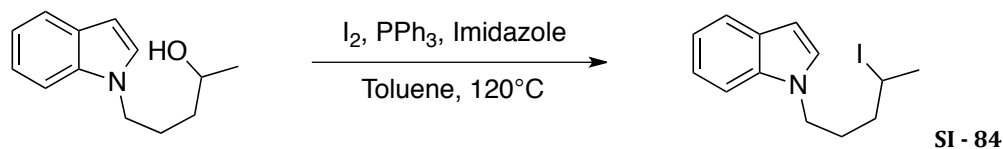

**(SI-84): N-(4-iodopentyl)indole.** Secondary alcohol SI-82 (1.0 g, 4.9 mmol) was iodinated with molecular iodine (1.3 g, 5.2 mmol) following General Procedure E. The crude product was purified by flash chromatography using hexanes/ethyl acetate (9:1) to provide secondary iodide SI-84 as a clear oil (45% Yield). <sup>1</sup>H-NMR (600 MHz, CDCl<sub>3</sub>): δ 7.67 (d, J = 7.8 Hz, 1H), 7.38 (d, J = 8.4 Hz, 1H), 7.25 (t, J = 8.4 Hz, 1H), 7.14 (t, J = 7.2 Hz, 1H), 7.12 (d, J = 3.0 Hz, 1H), 6.54 (d, J = 3.0 Hz, 1H), 4.17 (m, 2H), 4.15 (m, 1H), 2.11 (m, 1H), 1.99 (m, 1H), 1.91 (d, J = 7.2 Hz, 3H), 1.84 (m, 1H), 1.63 (m, 1H). <sup>13</sup>C-NMR (100 MHz, CDCl<sub>3</sub>): δ 135.87, 128.57, 127.56, 121.49, 121.01, 119.31, 109.24, 101.26, 45.40, 39.86, 30.54, 28.98, 28.92. IR (Thin Film, cm<sup>-1</sup>): 3048, 2934, 1611, 1461, 1373, 1232, 1155, 1012, 742. LRMS (ESI): Calculated for [C<sub>13</sub>H<sub>16</sub>INH]<sup>+</sup> 314.04, found 314.14.

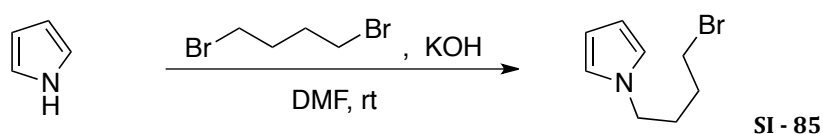

**(SI-85): N-(4-bromobutyl)pyrrole.** Pyrrole (3.0 g, 44.7 mmol) was alkylated with 1,4-dibromobutane (28.9 g, 134 mmol) following General Procedure M. The crude product was purified by flash chromatography using hexanes/ethyl acetate (20:1) to provide bromide SI-85 as a clear oil (45% yield). All physical and spectroscopic data were in accordance with the literature data.<sup>15</sup>

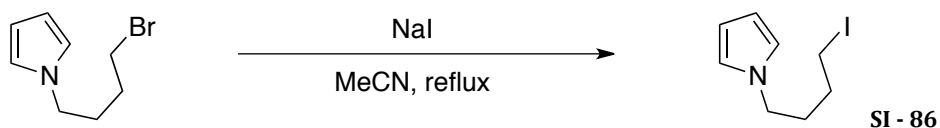

**(SI-86): N-(4-iodobutyl)pyrrole.** Primary chloride SI-85 (2.0 g, 9.9 mmol) was iodinated with sodium iodide (6.7 g, 44.6 mmol) following General Procedure M. The crude product was purified by flash chromatography using hexanes/ethyl acetate (20:1) to provide iodide SI-86 as a clear oil (50% yield). All physical and spectroscopic data were in accordance with the literature data.<sup>16</sup>

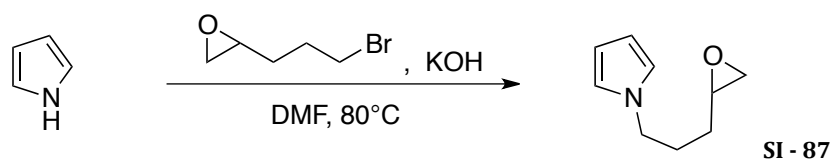

**(SI-87): N-(4,5-epoxypentyl)pyrrole.** Pyrrole (1.3 g, 20 mmol) was alkylated with (4-bromopropyl)oxirane (3.6 g, 22 mmol) following General Procedure L. The crude product was purified by flash chromatography using hexanes/ethyl acetate (7:1) to provide epoxide SI-87



as a clear oil (58% yield). All physical and spectroscopic data were in accordance with the literature data.<sup>17</sup>

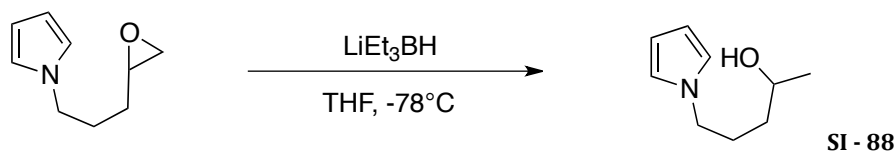

**(SI-88): N-(4-hydroxypentyl)pyrrole.** Following General Procedure D, epoxide SI-87 (0.6 g, 4.0 mmol) was reduced with super hydride (1M in THF, 4.8 mL, 4.8 mmol). The crude product was purified by flash chromatography using hexanes/ethyl acetate (1:1) to provide secondary alcohol SI-88 as a clear oil (70% Yield). **<sup>1</sup>H-NMR** (600 MHz, CDCl<sub>3</sub>): δ 6.68 (m, 2H), 6.16 (m, 2H), 3.93 (m, 2H), 3.82 (m, 1H), 1.96-1.91 (m, 1H), 1.86-1.82 (m, 1H), 1.45 (m, 2H), 1.21 (d, J = 6.0 Hz, 3H). **<sup>13</sup>C-NMR** (100 MHz, CDCl<sub>3</sub>): δ 120.44, 107.92, 67.69, 49.53, 36.17, 27.81, 23.69. **IR** (Thin Film, cm<sup>-1</sup>): 3372, 2928, 1673, 1501, 1375, 1281, 1089, 725. **LRMS** (ESI): Calculated for [C<sub>9</sub>H<sub>15</sub>NOH]<sup>+</sup> 154.13, found 154.19.

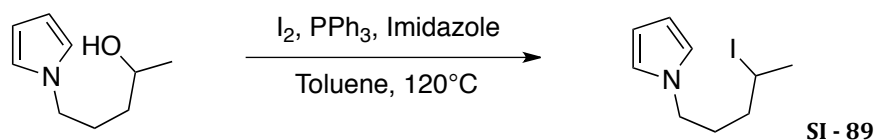

**(SI-89): N-(4-iodopentyl)pyrrole.** Secondary alcohol SI-88 (0.5 g, 3.2 mmol) was iodinated with molecular iodine (0.86 g, 3.4 mmol) following General Procedure E. The crude product was purified by flash chromatography using hexanes/ethyl acetate (7:1) to provide secondary iodide SI-89 as a clear oil (57% Yield). **<sup>1</sup>H-NMR** (600 MHz, CDCl<sub>3</sub>): δ 6.67 (m, 2H), 6.17 (m, 2H), 4.15 (m, 1H), 3.94 (t, J = 7.2 Hz, 2H), 2.02 (m, 1H), 1.93 (d, J = 6.6 Hz, 3H), 1.89 (m, 1H), 1.79 (m, 1H), 1.61 (m, 1H). **<sup>13</sup>C-NMR** (100 MHz, CDCl<sub>3</sub>): δ 120.41, 108.12, 48.61, 39.68, 31.75, 29.02, 28.94. **IR** (Thin Film, cm<sup>-1</sup>): 2924, 1500, 1444, 1375, 1280, 1141, 1088, 723, 617.

## Palladium-Catalyzed Reactions

### C-H Alkylation Procedure A:

To a one-dram vial in a glove box under argon atmosphere was added primary or secondary iodide (0.25 mmol, 1 equiv) and dissolved in 1,4-Dioxane (0.5 M). Pd(PPh<sub>3</sub>)<sub>4</sub> (10 mol%) and K<sub>3</sub>PO<sub>4</sub> (2 equiv) were then added. The reaction vial was removed from the glove box and heated in a pie block to 100°C, stirring for 6-24 hours. The reaction mixture was allowed to cool to ambient temperature, was quenched with 1N HCl and the aqueous layer was extracted with CH<sub>2</sub>Cl<sub>2</sub>. The combined organic layer was dried over MgSO<sub>4</sub>, filtered, and concentrated. The crude product was purified by flash chromatography.

### C-H Alkylation Procedure B:

To a one-dram vial in a glove box was added primary iodide (0.25 mmol, 1 equiv) and dissolved in tert-butylbenzene (0.5 M). Pd(PPh<sub>3</sub>)<sub>4</sub> (10 mol%) and K<sub>3</sub>PO<sub>4</sub> (2 equiv) were then added. The reaction vial was removed from the glove box and heated in a pie block to 100°C, stirring for 24 hours. The reaction mixture was allowed to cool to ambient temperature, was quenched with 1N HCl and the aqueous layer was extracted with CH<sub>2</sub>Cl<sub>2</sub>. The combined organic layer was dried over MgSO<sub>4</sub>, filtered, and concentrated. The crude product was purified by flash chromatography.

### C-H Alkylation Procedure C:

To a one-dram vial in a glove box was added primary bromide (0.25 mmol, 1 equiv) and dissolved in tert-butylbenzene (0.5 M). Pd(PPh<sub>3</sub>)<sub>4</sub> (10 mol%) and 1,2,2,6,6-pentamethylpiperidine (2 equiv) were then added. The reaction vial was removed from the glove box and heated in a pie block to 130°C, stirring for 48 hours. The reaction mixture was allowed to cool to ambient temperature, was quenched with 1N HCl and the aqueous layer was extracted with CH<sub>2</sub>Cl<sub>2</sub>. The combined organic layer was dried over MgSO<sub>4</sub>, filtered, and concentrated. The crude product was purified by flash chromatography.

### C-H Alkylation Procedure D:

To a one-dram vial in a glove box was added primary or secondary bromide (0.25 mmol, 1 equiv) and dissolved in tert-butylbenzene (0.5 M). Pd(PPh<sub>3</sub>)<sub>4</sub> (10 mol%) and K<sub>3</sub>PO<sub>4</sub> (2 equiv) were then added. The reaction vial was removed from the glove box and heated in a pie block to 130°C, stirring for 48 hours. The reaction mixture was allowed to cool to ambient temperature, was quenched with 1N HCl and the aqueous layer was extracted with CH<sub>2</sub>Cl<sub>2</sub>. The combined organic layer was dried over MgSO<sub>4</sub>, filtered, and concentrated. The crude product was purified by flash chromatography.

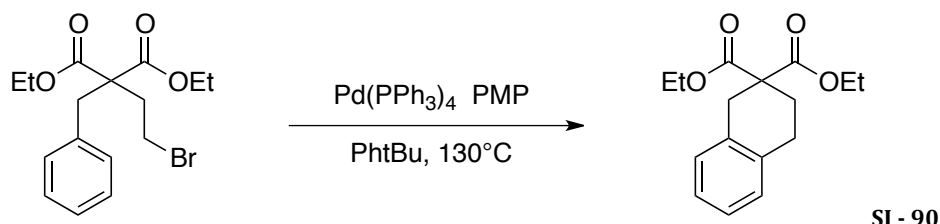

**Diethyl benzyl(2-bromoethyl)malonate.** Primary bromide SI-58 was made to react with  $\text{Pd}(\text{PPh}_3)_4$  following C-H Alkylation Procedure C. The crude product was purified by flash chromatography using hexanes/ethyl acetate (40:1) to provide tetrahydronaphthalene product SI-90 as a clear oil (62.6 mg, 91% Yield).  $^1\text{H-NMR}$  (600 MHz,  $\text{CDCl}_3$ ):  $\delta$  7.13 (m, 3H), 7.07 (m, 1H), 4.21 (q,  $J = 7.2$  Hz, 4H), 3.29 (s, 2H), 2.86 (t,  $J = 6.6$  Hz, 2H), 2.35 (t,  $J = 6.6$  Hz, 2H), 1.25 (t,  $J = 7.2$  Hz, 6H).  $^{13}\text{C-NMR}$  (100 MHz,  $\text{CDCl}_3$ ):  $\delta$  171.34, 134.63, 133.59, 128.80, 128.57, 126.02, 125.93, 61.38, 53.61, 34.64, 28.08, 25.92, 13.99. **IR** (Thin Film,  $\text{cm}^{-1}$ ): 2980, 1732, 1451, 1226, 1175, 1083, 861, 745. **LRMS** (ESI): Calculated for  $[\text{C}_{16}\text{H}_{20}\text{O}_4\text{H}]^+$  277.15, found 277.06.

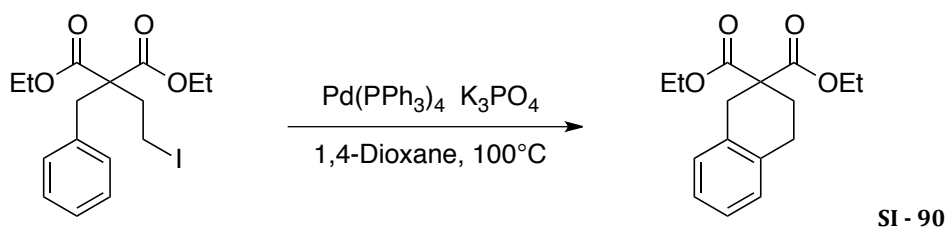

**Diethyl benzyl(2-iodoethyl)malonate.** Primary iodide SI-63 was made to react with  $\text{Pd}(\text{PPh}_3)_4$  following C-H Alkylation Procedure A. The crude product was purified by flash chromatography using hexanes/ethyl acetate (40:1) to provide tetrahydronaphthalene product SI-90 as a clear oil (58.7 mg, 85% Yield).

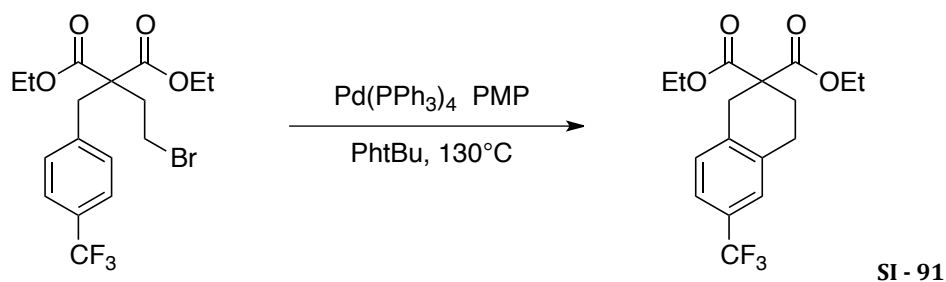

**Diethyl (2-bromoethyl)(4-trifluoromethylbenzyl)malonate.** Primary bromide SI-61 was made to react with  $\text{Pd}(\text{PPh}_3)_4$  following C-H Alkylation Procedure C. The crude product was purified by flash chromatography using hexanes/ethyl acetate (40:1) to provide tetrahydronaphthalene product SI-91 as a clear oil (79.4 mg, 92% Yield).  $^1\text{H-NMR}$  (600 MHz,

CDCl<sub>3</sub>): δ 7.39 (m, 1H), 7.28 (s, 1H), 7.25 (d, J = 8.4 Hz, 1H), 4.21 (q, J = 7.2 Hz, 4H), 3.32 (s, 2H), 2.90 (t, J = 6.6 Hz, 2H), 2.37 (t, J = 6.6 Hz, 2H), 1.26 (t, J = 7.2 Hz, 6H). <sup>13</sup>C-NMR (100 MHz, CDCl<sub>3</sub>): δ 170.99, 137.82, 135.35, 129.23, 129.04, 128.27, 125.50, 125.47, 125.45, 125.12, 123.32, 122.74, 122.71, 61.61, 53.36, 34.60, 27.78, 25.94, 13.99. **IR** (Thin Film, cm<sup>-1</sup>): 2983, 1733, 1443, 1330, 1267, 1163, 1124, 1020, 859, 824. **LRMS** (ESI): Calculated for [C<sub>17</sub>H<sub>19</sub>F<sub>3</sub>O<sub>4</sub>H]<sup>+</sup> 345.33, found 345.19.

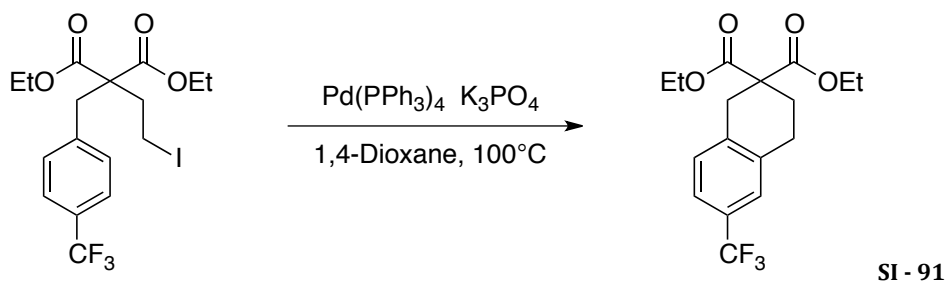

**Diethyl (2-iodoethyl)(4-trifluoromethylbenzyl)malonate.** Primary iodide SI-66 was made to react with Pd(PPh<sub>3</sub>)<sub>4</sub> following C-H Alkylation Procedure A. The crude product was purified by flash chromatography using hexanes/ethyl acetate (40:1) to provide tetrahydronaphthalene product SI-91 as a clear oil (58.5 mg, 68% Yield).

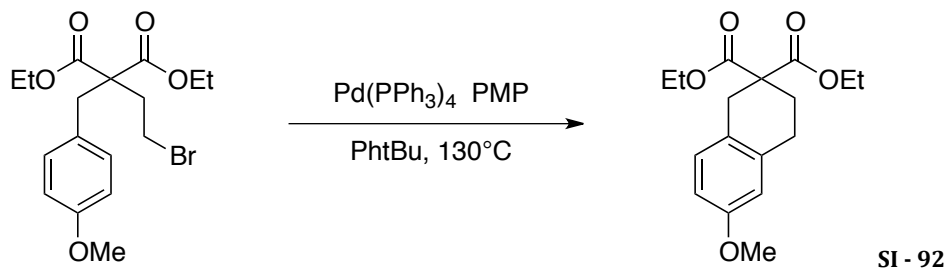

**Diethyl (2-bromoethyl)(4-methoxybenzyl)malonate.** Primary bromide SI-59 was made to react with Pd(PPh<sub>3</sub>)<sub>4</sub> following C-H Alkylation Procedure C. The crude product was purified by flash chromatography using hexanes/ethyl acetate (40:1) to provide tetrahydronaphthalene product SI-92 as a clear oil (59.8 mg, 78% Yield). <sup>1</sup>H-NMR (600 MHz, CDCl<sub>3</sub>): δ 7.05 (d, J = 8.4 Hz, 1H), 6.72 (m, 1H), 6.61 (s, 1H), 4.20 (q, J = 7.2 Hz, 4H), 3.78 (s, 3H), 3.22 (s, 2H), 2.84 (s, J = 7.0 Hz, 2H), 2.32 (t, J = 7.0 Hz, 2H), 1.25 (t, J = 7.2 Hz, 6H). <sup>13</sup>C-NMR (100 MHz, CDCl<sub>3</sub>): δ 171.38, 157.80, 135.73, 129.69, 125.69, 113.11, 112.41, 61.37, 55.17, 53.77, 33.95, 28.03, 26.25, 14.02. **IR** (Thin Film, cm<sup>-1</sup>): 2980, 1732, 1612, 1504, 1445, 1225, 1051, 858, 808. **LRMS** (ESI): Calculated for [C<sub>17</sub>H<sub>22</sub>O<sub>5</sub>H]<sup>+</sup> 307.16, found 307.22.

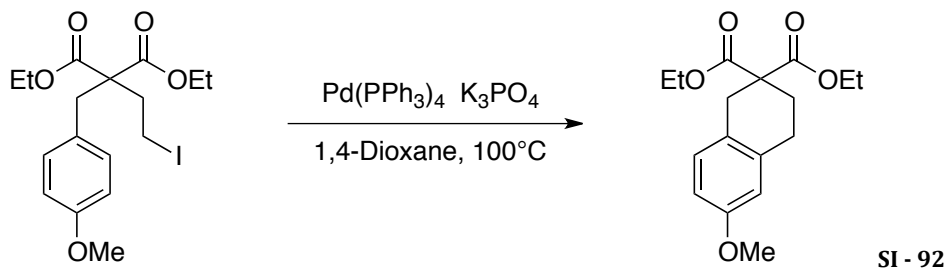

**Diethyl (2-iodoethyl)(4-methoxybenzyl)malonate.** Primary iodide SI-64 was made to react with Pd(PPh<sub>3</sub>)<sub>4</sub> following C-H Alkylation Procedure A. The crude product was purified by flash chromatography using hexanes/ethyl acetate (40:1) to provide tetrahydronaphthalene product SI-92 as a clear oil (50.6 mg, 66% Yield).

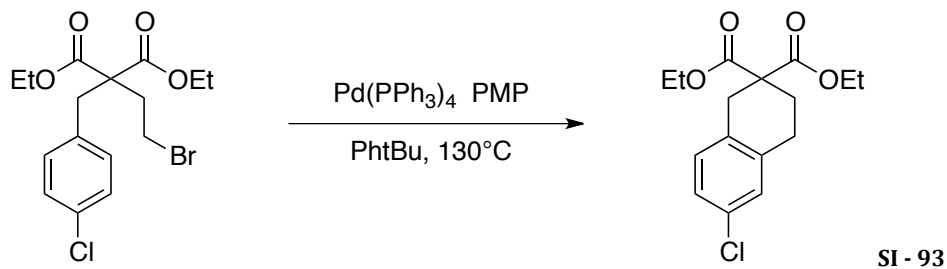

**Diethyl (2-bromoethyl)(4-chlorobenzyl)malonate.** Primary bromide SI-60 was made to react with Pd(PPh<sub>3</sub>)<sub>4</sub> following C-H Alkylation Procedure C. The crude product was purified by flash chromatography using hexanes/ethyl acetate (40:1) to provide tetrahydronaphthalene product SI-93 as a clear oil (58.4 mg, 75% Yield). **<sup>1</sup>H-NMR** (600 MHz, CDCl<sub>3</sub>): δ 7.10 (m, 1H), 7.06 (m, 2H), 4.20 (q, J = 7.2 Hz, 4H), 3.23 (s, 2H), 2.83 (t, J = 6.6 Hz, 2H), 2.32 (t, J = 6.6 Hz, 2H), 1.25 (t, J = 7.2 Hz, 6H). **<sup>13</sup>C-NMR** (100 MHz, CDCl<sub>3</sub>): δ 171.08, 136.47, 132.12, 131.55, 130.08, 128.38, 126.17, 61.52, 53.46, 34.15, 27.73, 25.84, 14.00, 13.97. **IR** (Thin Film, cm<sup>-1</sup>): 2981, 1732, 1486, 1263, 1180, 1087, 1019, 858, 809. **LRMS** (ESI): Calculated for [C<sub>16</sub>H<sub>19</sub>ClO<sub>4</sub>H]<sup>+</sup> 311.11, found 311.08.

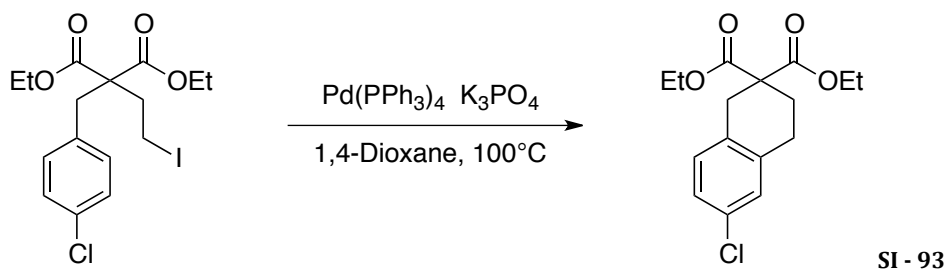

**Diethyl (4-chlorobenzyl)(2-iodoethyl)malonate.** Primary iodide SI-65 was made to react with Pd(PPh<sub>3</sub>)<sub>4</sub> following C-H Alkylation Procedure A. The crude product was purified by flash

chromatography using hexanes/ethyl acetate (40:1) to provide tetrahydronaphthalene product SI-93 as a clear oil (45.8 mg, 59% Yield).

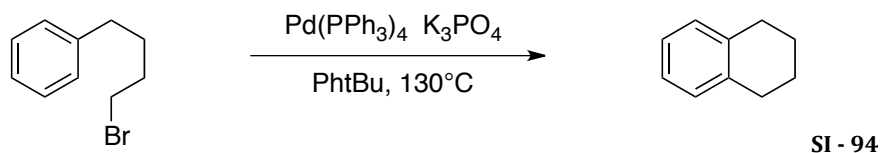

**(4-bromobutyl)benzene.** Primary bromide SI-74 was made to react with Pd(PPh<sub>3</sub>)<sub>4</sub> following C-H Alkylation Procedure D. The yield of the crude product was determined via gas chromatography using cyclooctane as internal standard (89% Yield). All physical and spectroscopic data were in accordance with the literature data.

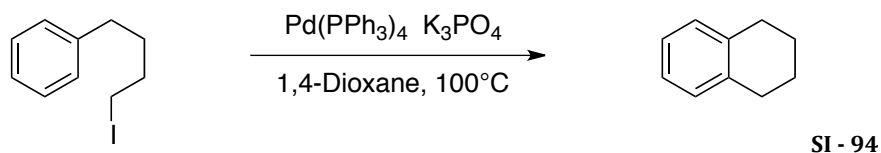

**(4-iodobutyl)benzene.** Primary iodide SI-73 was made to react with Pd(PPh<sub>3</sub>)<sub>4</sub> following C-H Alkylation Procedure A. The yield of the crude product was determined via gas chromatography using cyclooctane as internal standard (51% Yield). All physical and spectroscopic data were in accordance with the literature data.

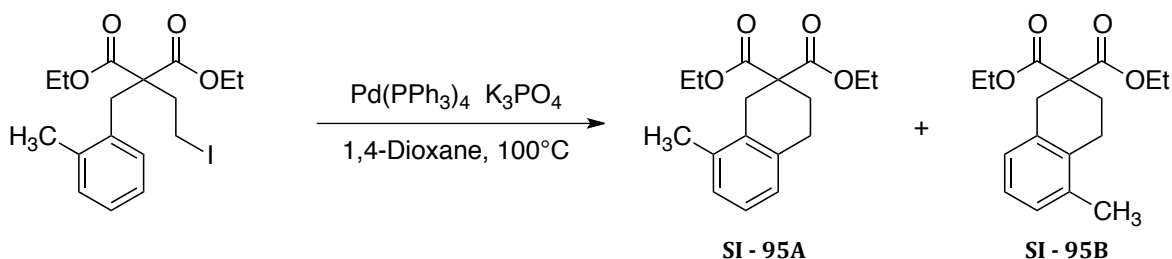

**Diethyl (2-iodoethyl)(2-methylbenzyl)malonate.** Primary iodide SI-67 was made to react with Pd(PPh<sub>3</sub>)<sub>4</sub> following C-H Alkylation Procedure A. The crude product was purified by flash chromatography using hexanes/ethyl acetate (40:1) to provide a 50:50 mixture of tetrahydronaphthalene products SI-95A and SI-95B as a clear oil (54.4 mg, 75% Yield). **<sup>1</sup>H-NMR** (600 MHz, CDCl<sub>3</sub>): δ 7.04 (m, 2H), 7.01 (m, 3H), 6.94 (m, 1H), 4.20 (m, 8H), 3.29 (s, 2H), 3.15 (s, 2H), 2.83 (t, J = 6.6 Hz, 2H), 2.73 (t, J = 6.6 Hz, 2H), 2.37 (t, J = 6.6 Hz, 2H), 2.32 (t, J = 6.6 Hz, 2H), 2.30 (s, 3H), 2.21 (s, 3H), 1.25 (m, 12H). **<sup>13</sup>C-NMR** (100 MHz, CDCl<sub>3</sub>): δ 171.58, 171.36, 136.28, 136.13, 134.62, 133.38, 133.06, 132.16, 127.60, 127.51, 126.64, 126.36, 125.65, 125.61, 61.43, 61.36, 53.87, 53.27, 35.18, 31.89, 28.18, 27.70, 26.32, 23.69, 19.59,

19.41, 14.00. **IR** (Thin Film,  $\text{cm}^{-1}$ ): 2978, 2935, 1733, 1463, 1257, 1176, 1090, 1024, 862, 767. **LRMS** (ESI): Calculated for  $[\text{C}_{17}\text{H}_{22}\text{O}_4\text{H}]^+$  291.16, found 291.05.

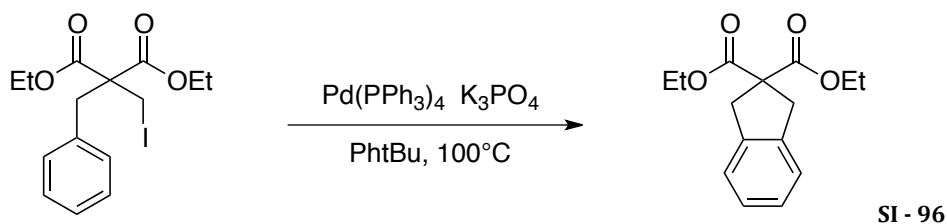

**Diethyl benzyl(iodomethyl)malonate.** Primary iodide SI-70 was made to react with  $\text{Pd}(\text{PPh}_3)_4$  following C-H Alkylation Procedure B. The yield of the crude product was determined by NMR spectroscopy using 1,3,5-trimethoxybenzene as internal standard (88% Yield). The crude product was then purified by flash chromatography using hexanes/ethyl acetate (40:1) to provide indane product SI-96 as a clear oil.  **$^1\text{H-NMR}$**  (600 MHz,  $\text{CDCl}_3$ ):  $\delta$  7.21 (m, 2H), 7.18 (m, 2H), 4.23 (q,  $J = 6.6$  Hz, 4H), 3.62 (s, 4H), 1.28 (t,  $J = 7.2$  Hz, 6H).  **$^{13}\text{C-NMR}$**  (100 MHz,  $\text{CDCl}_3$ ):  $\delta$  171.67, 139.98, 126.87, 124.18, 61.68, 60.30, 40.47, 14.02. **IR** (Thin Film,  $\text{cm}^{-1}$ ): 2980, 2929, 1732, 1461, 1280, 1246, 1188, 1068, 861, 740. **LRMS** (ESI): Calculated for  $[\text{C}_{15}\text{H}_{18}\text{O}_4\text{H}]^+$  263.13, found 263.16.

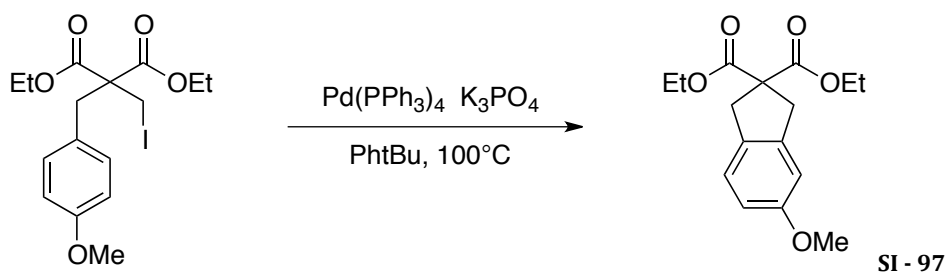

**Diethyl (iodomethyl)(4-methoxybenzyl)malonate.** Primary iodide SI-71 was made to react with  $\text{Pd}(\text{PPh}_3)_4$  following C-H Alkylation Procedure B. The yield of the crude product was determined by NMR spectroscopy using 1,3,5-trimethoxybenzene as internal standard (66% Yield). The crude product was then purified by flash chromatography using hexanes/ethyl acetate (40:1) to provide indane product SI-97 as a clear oil.  **$^1\text{H-NMR}$**  (600 MHz,  $\text{CDCl}_3$ ):  $\delta$  7.10 (d,  $J = 7.8$  Hz, 1H), 6.76 (s, 1H), 6.74 (m, 1H), 4.22 (q,  $J = 7.2$  Hz, 4H), 3.79 (s, 3H), 3.58 (s, 2H), 3.54 (s, 2H), 1.28 (t,  $J = 7.2$  Hz, 6H).  **$^{13}\text{C-NMR}$**  (100 MHz,  $\text{CDCl}_3$ ):  $\delta$  171.67, 159.12, 141.47, 131.90, 124.74, 113.01, 109.50, 61.66, 60.79, 55.38, 40.61, 39.66, 14.02. **IR** (Thin Film,  $\text{cm}^{-1}$ ): 3231, 3019, 1455, 1302, 1135, 1061, 972, 737, 700, 524. **LRMS** (ESI): Calculated for  $[\text{C}_{16}\text{H}_{20}\text{O}_5\text{H}]^+$  293.14, found 293.23.

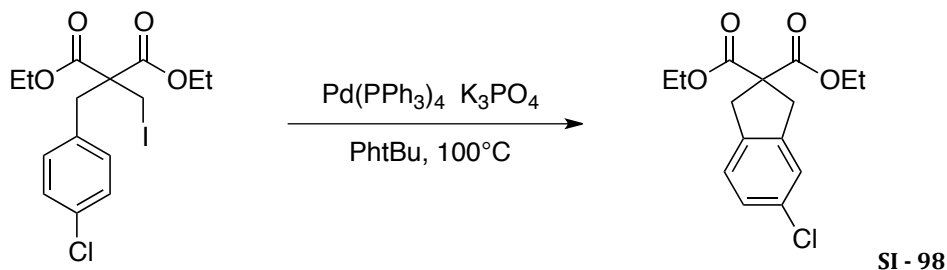

**(4-chlorobenzyl)(iodomethyl)malonate.** Primary iodide SI-72 was made to react with Pd(PPh<sub>3</sub>)<sub>4</sub> following C-H Alkylation Procedure B. The yield of the crude product was determined by NMR spectroscopy using 1,3,5-trimethoxybenzene as internal standard (74% Yield). The crude product was then purified by flash chromatography using hexanes/ethyl acetate (40:1) to provide indane product SI-98 as a clear oil. <sup>1</sup>H-NMR (600 MHz, CDCl<sub>3</sub>): δ 7.19 (s, 1H), 7.14 (m, 2H), 4.23 (q, J = 7.2 Hz, 4H), 3.58 (s, 2H), 3.56 (s, 2H), 1.28 (t, J = 7.2 Hz, 6H). <sup>13</sup>C-NMR (100 MHz, CDCl<sub>3</sub>): δ 171.28, 141.97, 138.47, 132.60, 127.10, 125.24, 124.43, 61.82, 40.22, 39.85, 13.99. IR (Thin Film, cm<sup>-1</sup>): 2982, 1732, 1473, 1274, 1245, 1189, 1069, 962. LRMS (ESI): Calculated for [C<sub>15</sub>H<sub>17</sub>ClO<sub>4</sub>H]<sup>+</sup> 297.09, found 297.13.

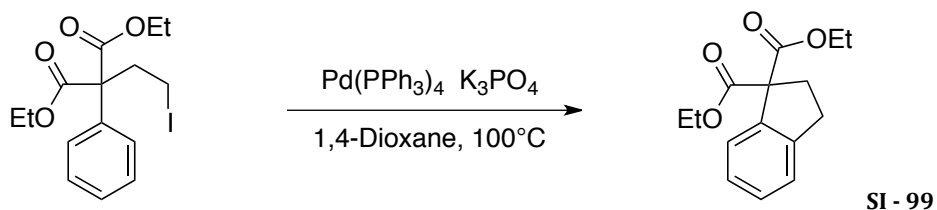

**Diethyl (2-iodoethyl)phenylmalonate.** Primary iodide SI-69 was made to react with Pd(PPh<sub>3</sub>)<sub>4</sub> following C-H Alkylation Procedure A. The crude product was purified by flash chromatography using hexanes/ethyl acetate (40:1) to provide indane product SI-99 as a clear oil (54.7 mg, 83% Yield). <sup>1</sup>H-NMR (600 MHz, CDCl<sub>3</sub>): δ 7.59 (d, J = 7.2 Hz, 1H), 7.25 (m, 2H), 4.23 (m, 4H), 3.05 (t, J = 7.2 Hz, 2H), 2.72 (t, J = 7.2 Hz, 2H), 1.28 (t, J = 7.2 Hz, 6H). <sup>13</sup>C-NMR (100 MHz, CDCl<sub>3</sub>): δ 170.77, 136.92, 128.13, 128.06, 127.38, 63.10, 61.40, 31.39, 28.85, 14.00, 13.95, 9.29. IR (Thin Film, cm<sup>-1</sup>): 2980, 1731, 1238, 1025, 698, 509. LRMS (ESI): Calculated for [C<sub>15</sub>H<sub>18</sub>O<sub>4</sub>H]<sup>+</sup> 263.13, found 263.17.

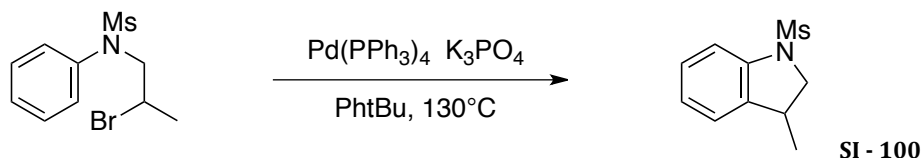

**N-(2-bromopropyl)-n-phenylmethanesulfonamide.** Secondary bromide SI-39 was made to react with Pd(PPh<sub>3</sub>)<sub>4</sub> following C-H Alkylation Procedure D. The crude product was purified by flash chromatography using hexanes/ethyl acetate (20:1) to provide indoline product SI-



100 as a pale orange solid (28.5 mg, 54% Yield). **<sup>1</sup>H-NMR** (600 MHz, CDCl<sub>3</sub>): δ 7.42 (d, J = 7.8 Hz, 1H), 7.22 (m, 2H), 7.08 (t, J = 7.2 Hz, 2H), 4.16 (m, 1H), 3.50 (m, 2H), 2.90 (s, 3H), 1.38 (d, J = 6.0 Hz, 3H). **<sup>13</sup>C-NMR** (100 MHz, CDCl<sub>3</sub>): δ 141.47, 136.26, 128.14, 124.21, 123.75, 113.50, 58.03, 34.74, 34.27, 19.47. **IR** (Thin Film, cm<sup>-1</sup>): 3249, 1617, 1520, 1479, 1327, 1147, 979, 916, 844. **LRMS** (ESI): Calculated for [C<sub>10</sub>H<sub>13</sub>NO<sub>2</sub>SH]<sup>+</sup> 212.08, found 212.07.

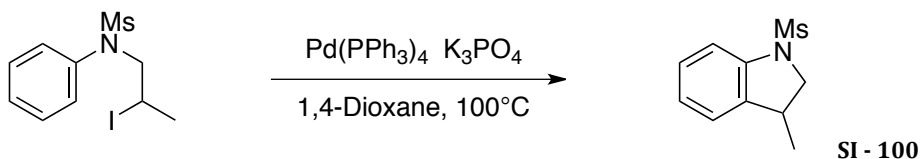

**N-(2-iodopropyl)-n-phenylmethanesulfonamide.** Secondary iodide SI-38 was made to react with Pd(PPh<sub>3</sub>)<sub>4</sub> following C-H Alkylation Procedure A. The crude product was purified by flash chromatography using hexanes/ethyl acetate (20:1) to provide indoline product SI-100 as a pale orange solid (43.5 mg, 82% Yield).

Iodide SI-38 (338 mg, 1.0 mmol) was set up to react with Pd(PPh<sub>3</sub>)<sub>4</sub> (116 mg, 0.1 mmol) and K<sub>3</sub>PO<sub>4</sub> (424 mg, 2.0 mmol) in 1,4-dioxane (2.0 mL 0.5 M) following C-H Alkylation Procedure A. The crude product was purified by flash chromatography using hexanes/ethyl acetate (10:1) to provide indoline product SI-100 as a pale orange solid (177 mg, 84% Yield).

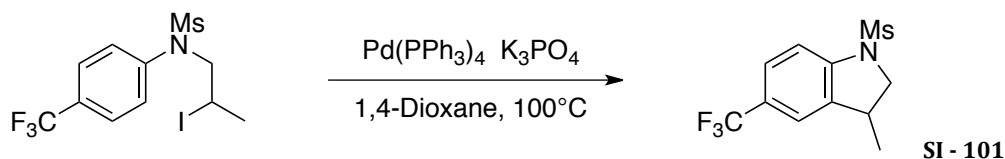

**N-(2-iodopropyl)-n-(4-trifluoromethylphenyl)methanesulfonamide.** Secondary iodide SI-41 was made to react with Pd(PPh<sub>3</sub>)<sub>4</sub> following C-H Alkylation Procedure A. The crude product was purified by flash chromatography using hexanes/ethyl acetate (20:1) to provide indoline product SI-101 as a pale orange solid (48.8 mg, 70% Yield). **<sup>1</sup>H-NMR** (600 MHz, CDCl<sub>3</sub>): δ 7.50 (m, 2H), 7.44 (s, 1H), 4.23 (m, 1H), 3.59 (m, 1H), 3.54 (m, 1H), 2.95 (s, 3H), 1.42 (s, J = 7.2 Hz, 3H). **<sup>13</sup>C-NMR** (100 MHz, CDCl<sub>3</sub>): δ 144.43, 136.87, 126.01, 125.90, 125.87, 125.80, 125.07, 123.27, 121.45, 121.43, 112.98, 58.16, 35.08, 34.51, 19.43. **IR** (Thin Film, cm<sup>-1</sup>): 2931, 1617, 1492, 1338, 1161, 1119, 985, 833, 770, 551. **LRMS** (ESI): Calculated for [C<sub>11</sub>H<sub>12</sub>F<sub>3</sub>NO<sub>2</sub>SH]<sup>+</sup> 280.06, found 280.11.

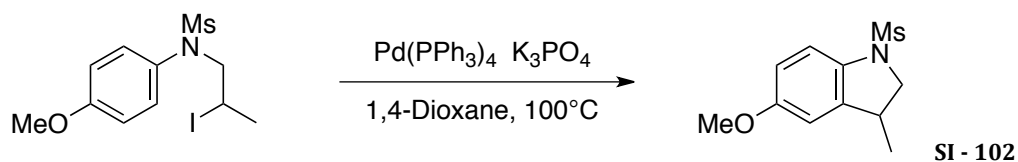

**N-(2-iodopropyl)-n-(4-methoxyphenyl)methanesulfonamide.** Secondary iodide SI-40 was made to react with Pd(PPh<sub>3</sub>)<sub>4</sub> following C-H Alkylation Procedure A. The crude product was purified by flash chromatography using hexanes/ethyl acetate (20:1) to provide indoline product SI-85 as a pale orange solid (39.6 mg, 66% Yield). **<sup>1</sup>H-NMR** (600 MHz, CDCl<sub>3</sub>): δ 7.35 (d, J = 8.4 Hz, 1H), 6.78 (s, 1H), 6.76 (s, J = 8.4 Hz, 1H), 4.17 (m, 1H), 3.82 (s, 3H), 3.49 (m, 2H), 2.85 (s, 3H), 1.38 (d, J = 6.6 Hz, 3H). **<sup>13</sup>C-NMR** (100 MHz, CDCl<sub>3</sub>): δ 156.90, 138.10, 134.97, 114.77, 112.70, 110.54, 58.38, 55.71, 35.04, 33.76, 19.27. **IR** (Thin Film, cm<sup>-1</sup>): 2964, 1596, 1485, 1344, 1232, 1159, 1032, 1159, 1032, 982, 850, 770. **LRMS** (ESI): Calculated for [C<sub>11</sub>H<sub>15</sub>NO<sub>3</sub>SH]<sup>+</sup> 242.09, found 242.02.

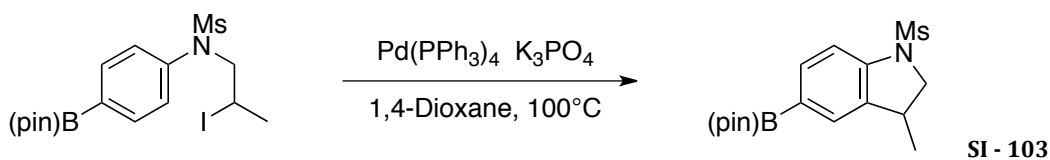

**N-(2-iodopropyl)-n-(4-(4,4,5,5-Tetramethyl-1,3,2-dioxaborolan-2-yl)phenyl)methanesulfonamide.** Secondary iodide SI-42 was made to react with Pd(PPh<sub>3</sub>)<sub>4</sub> following C-H Alkylation Procedure A. The crude product was purified by flash chromatography using hexanes/ethyl acetate (20:1) to provide indoline product SI-85 as a pale orange solid (60.4 mg, 72% Yield). **<sup>1</sup>H-NMR** (600 MHz, CDCl<sub>3</sub>): δ 7.72 (d, J = 7.8 Hz, 1H), 7.68 (s, 1H), 7.42 (d, J = 7.8 Hz, 1H), 4.17 (dd, J = 9.6 Hz, 9.0 Hz, 1H), 3.51 (m, 2H), 2.90 (s, 3H), 1.40 (d, J = 6.6 Hz, 3H), 1.37 (s, 12H). **<sup>13</sup>C-NMR** (100 MHz, CDCl<sub>3</sub>): δ 135.56, 135.42, 130.54, 112.59, 83.81, 58.15, 34.53, 34.48, 24.89, 24.79, 19.53. **IR** (Thin Film, cm<sup>-1</sup>): 2976, 1608, 1351, 1161, 1122, 963, 861, 772. **LRMS** (ESI): Calculated for [C<sub>16</sub>H<sub>24</sub>BNO<sub>4</sub>SNa]<sup>+</sup> 360.23, found 360.44.

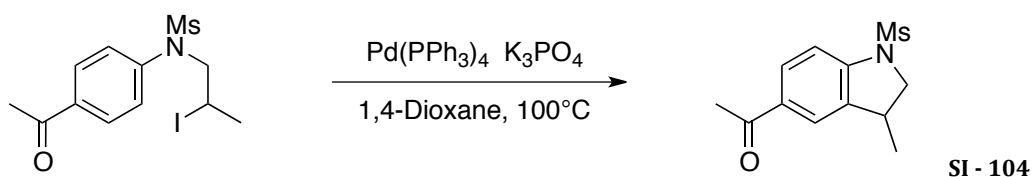

**N-(4-acetylphenyl)-n-(2-iodopropyl)methanesulfonamide.** Secondary iodide SI-51 was made to react with Pd(PPh<sub>3</sub>)<sub>4</sub> following C-H Alkylation Procedure A. The crude product was purified by flash chromatography using hexanes/ethyl acetate (1:1) to provide indoline product SI-104 as a pale orange solid (48.5 mg, 77% Yield). **<sup>1</sup>H-NMR** (600 MHz, CDCl<sub>3</sub>): δ 7.86 (d, J = 8.4 Hz, 1H), 7.84 (s, 1H), 7.44 (d, J = 8.4 Hz, 1H), 4.23 (t, J = 9.0 Hz, 1H), 3.58 (dd, J = 9.6 Hz, 7.2 Hz, 1H), 3.52 (m, 1H), 2.96 (s, 3H), 2.59 (s, 3H), 1.42 (d, J = 6.6 Hz, 3H). **<sup>13</sup>C-NMR** (100 MHz, CDCl<sub>3</sub>): δ 196.65, 145.61, 136.71, 133.00, 129.93, 124.31, 112.31, 58.26, 35.27, 34.29, 26.49, 19.52. **IR** (Thin Film, cm<sup>-1</sup>): 2965, 1675, 1604, 1483, 1351, 1258, 1161, 985, 771. **LRMS** (ESI): Calculated for [C<sub>12</sub>H<sub>15</sub>NO<sub>3</sub>SNa]<sup>+</sup> 276.31, found 276.30.

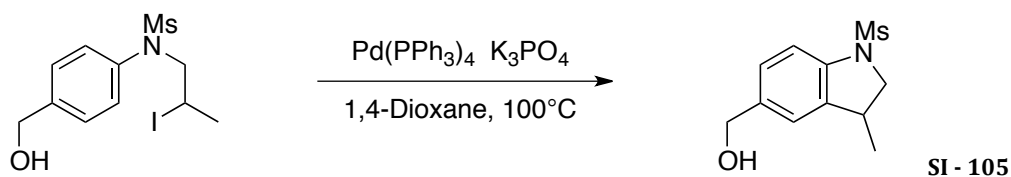

**N-(4-(hydroxymethyl)phenyl)-n-(2-iodopropyl)methanesulfonamide.** Secondary iodide SI-52 was made to react with Pd(PPh<sub>3</sub>)<sub>4</sub> following C-H Alkylation Procedure A. The crude product was purified by flash chromatography using hexanes/ethyl acetate (1:1) to provide indoline product SI-105 as a pale orange solid (34.5 mg, 57% Yield). **<sup>1</sup>H-NMR** (600 MHz, CDCl<sub>3</sub>): δ 7.40 (d, J = 8.4 Hz, 1H), 7.25 (s, 1H), 7.22 (d, J = 8.4 Hz, 1H), 4.68 (s, 2H), 4.18 (t, J = 8.4 Hz, 1H), 3.51 (m, 2H), 2.89 (s, 3H), 1.68 (bs, 1H), 1.38 (d, J = 6.6 Hz, 3H). **<sup>13</sup>C-NMR** (100 MHz, CDCl<sub>3</sub>): δ 141.10, 136.79, 128.62, 127.21, 123.27, 113.48, 65.02, 58.24, 34.71, 34.23, 19.43. **IR** (Thin Film, cm<sup>-1</sup>): 3522, 2928, 1485, 1343, 1159, 985, 771, 557. **LRMS** (ESI): Calculated for [C<sub>11</sub>H<sub>15</sub>NO<sub>3</sub>SNa]<sup>+</sup> 264.80, found 264.35.

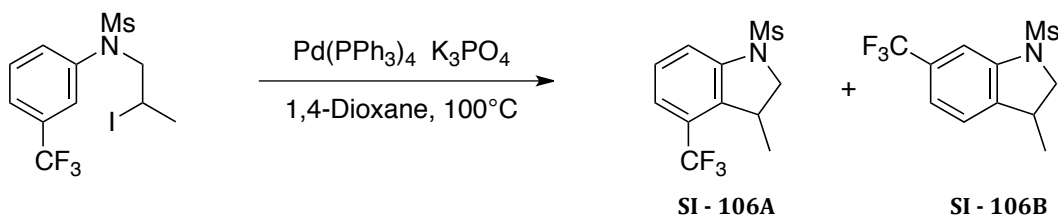

**N-(2-iodopropyl)-n-(3-(trifluoromethyl)phenyl)methanesulfonamide.** Secondary iodide SI-45 was made to react with Pd(PPh<sub>3</sub>)<sub>4</sub> following C-H Alkylation Procedure A. The crude product was purified by flash chromatography using hexanes/ethyl acetate (20:1) to provide indoline products SI-106A and SI-106B as pale orange solids (56.7 mg, 81% Yield, 2.4:1 A:B). **SI-106A:** **<sup>1</sup>H-NMR** (600 MHz, CDCl<sub>3</sub>): δ 7.63 (d, J = 8.4 Hz, 1H), 7.36 (t, J = 7.8 Hz), 7.31 (d, J = 7.2 Hz), 3.94 (dd, J = 10.2 Hz, 8.4 Hz, 1H), 3.84 (dd, J = 9.6 Hz, 1.8 Hz, 1H), 3.68 (m, 1H), 2.94 (s, 3H), 1.36 (d, J = 7.2 Hz, 3H). **<sup>13</sup>C-NMR** (100 MHz, CDCl<sub>3</sub>): δ 142.54, 134.38, 128.90, 127.36, 127.15, 124.87, 123.06, 120.81, 120.78, 120.75, 120.72, 116.49, 58.31, 34.72, 34.31, 21.09. **IR** (Thin Film, cm<sup>-1</sup>): 2934, 1596, 1453, 1353, 1318, 1252, 1162, 1122, 997, 801, 549. **LRMS** (ESI): Calculated for [C<sub>11</sub>H<sub>12</sub>F<sub>3</sub>NO<sub>2</sub>SH]<sup>+</sup> 280.06, found 280.10. **SI-106B:** **<sup>1</sup>H-NMR** (600 MHz, CDCl<sub>3</sub>): δ 7.65 (s, 1H), 7.35 (d, J = 7.8 Hz, 1H), 7.30 (d, J = 7.8 Hz, 1H), 4.22 (m, 1H), 3.58 (m, 1H), 3.54 (m, 1H), 2.95 (s, 3H), 1.41 (d, J = 7.2 Hz, 3H). **<sup>13</sup>C-NMR** (100 MHz, CDCl<sub>3</sub>): δ 142.04, 124.55, 120.85, 110.18, 58.04, 34.96, 34.69, 19.38. **IR** (Thin Film, cm<sup>-1</sup>): 2933, 1432, 1351, 1321, 1276, 1162, 1123, 991, 824, 551. **LRMS** (ESI): Calculated for [C<sub>11</sub>H<sub>12</sub>F<sub>3</sub>NO<sub>2</sub>SH]<sup>+</sup> 280.06, found 280.11.

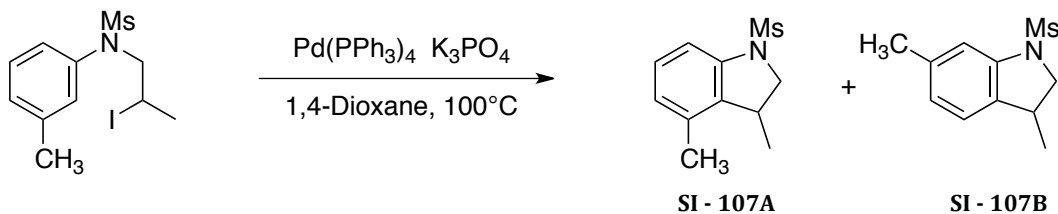

**N-(2-iodopropyl)-n-(3-tolyl)methanesulfonamide.** Secondary iodide SI-46 was made to react with  $\text{Pd(PPh}_3)_4$  following C-H Alkylation Procedure A. The yield of the crude product was determined by NMR spectroscopy using 1,3,5-trimethoxybenzene as internal standard (91% Yield, 2.0:1 A:B). The crude product was then purified by flash chromatography using hexanes/ethyl acetate (40:1) to provide a mixture of indoline products SI-107A and SI-107B as a pale orange solid.  **$^1\text{H-NMR}$**  (600 MHz,  $\text{CDCl}_3$ ):  $\delta$  7.24 (s, 2H), 7.13 (t,  $J = 9.2$  Hz, 1H), 7.07 (d,  $J = 7.6$  Hz, 1H), 6.87 (t,  $J = 7.6$  Hz, 2H), 4.15 (m, 1H), 3.92 (m, 1H), 3.74 (m, 1H), 3.47 (m, 3H), 2.89 (s, 3H), 2.88 (s, 3H), 2.36 (s, 3H), 2.32 (s, 3H), 1.34 (d,  $J = 6.4$  Hz, 3H), 1.30 (d,  $J = 6.4$  Hz, 3H).  **$^{13}\text{C-NMR}$**  (100 MHz,  $\text{CDCl}_3$ ):  $\delta$  138.31, 134.68, 133.43, 128.25, 125.23, 124.46, 123.86, 114.19, 110.85, 58.36, 57.99, 34.42, 34.08, 21.57, 19.76, 19.59, 18.20. **IR** (Thin Film,  $\text{cm}^{-1}$ ): 2964, 2927, 1610, 1455, 1346, 1246, 1159, 1077, 956, 771, 550. **LRMS** (ESI): Calculated for  $[\text{C}_{11}\text{H}_{15}\text{NO}_2\text{SH}]^+$  226.09, found 226.00.

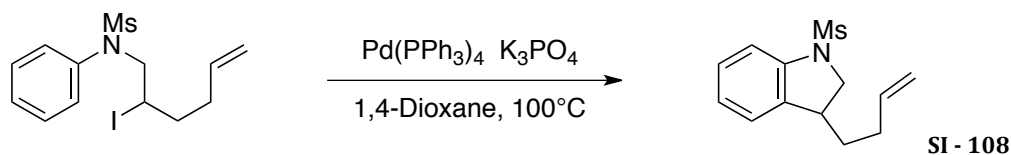

**N-(2-iodohex-5-enyl)-n-phenylmethanesulfonamide.** Secondary iodide SI-50 was made to react with  $\text{Pd(PPh}_3)_4$  following C-H Alkylation Procedure A. The crude product was purified by flash chromatography using hexanes/ethyl acetate (10:1) to provide indoline product SI-108 as a pale orange solid (50.1 mg, 80% Yield).  **$^1\text{H-NMR}$**  (600 MHz,  $\text{CDCl}_3$ ):  $\delta$  7.42 (d,  $J = 8.4$  Hz, 1H), 7.23 (m, 2H), 7.08 (t,  $J = 7.2$  Hz, 1H), 5.85 (m, 1H), 5.09 (dd,  $J = 26.4$  Hz, 10.2 Hz, 2H), 4.10 (t,  $J = 9.6$  Hz, 1H), 3.65 (m, 1H), 3.41 (m, 1H), 2.90 (s, 3H), 2.20 (m, 2H), 1.96 (m, 1H), 1.69 (m, 1H).  **$^{13}\text{C-NMR}$**  (100 MHz,  $\text{CDCl}_3$ ):  $\delta$  141.63, 137.40, 134.88, 128.28, 124.63, 123.60, 115.61, 113.41, 56.18, 39.35, 34.23, 33.91, 31.13. **IR** (Thin Film,  $\text{cm}^{-1}$ ): 2927, 1593, 1491, 1342, 1154, 962, 775, 697, 542. **LRMS** (ESI): Calculated for  $[\text{C}_{13}\text{H}_{17}\text{NO}_2\text{SNa}]^+$  274.33, found 274.38.

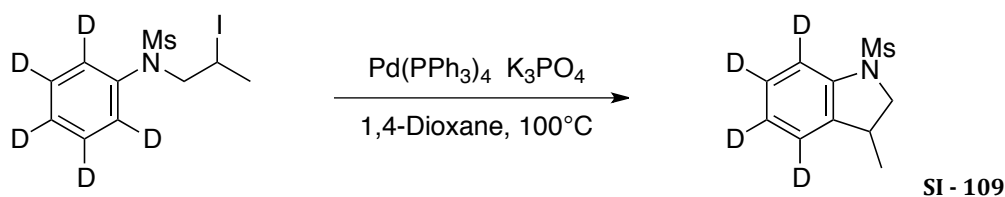

**N-(2-iodopropyl)-n-(perdeuterophenyl)methanesulfonamide.** Secondary iodide SI-47 was made to react with Pd(PPh<sub>3</sub>)<sub>4</sub> following C-H Alkylation Procedure A. The crude product was then purified by flash chromatography using hexanes/ethyl acetate (40:1) to provide indoline product SI-109 as a pale orange solid. **<sup>1</sup>H-NMR** (600 MHz, CDCl<sub>3</sub>): δ 4.16 (m, 1H), 3.50 (m, 2H), 2.89 (s, 3H), 1.38 (d, J = 6.6 Hz, 3H). **<sup>13</sup>C-NMR** (100 MHz, CDCl<sub>3</sub>): δ 141.40, 136.16, 127.79, 127.63, 127.47, 123.97, 123.81, 123.65, 123.41, 123.25, 123.09, 113.30, 113.13, 112.97, 58.04, 34.72, 34.23, 19.46. **IR** (Thin Film, cm<sup>-1</sup>): 2965, 2874, 2283, 1582, 1454, 1399, 1346, 1228, 1159, 1078, 975, 768. **LRMS** (ESI): Calculated for [C<sub>10</sub>H<sub>9</sub>D<sub>4</sub>NO<sub>2</sub>SH]<sup>+</sup> 216.10, found 216.16.

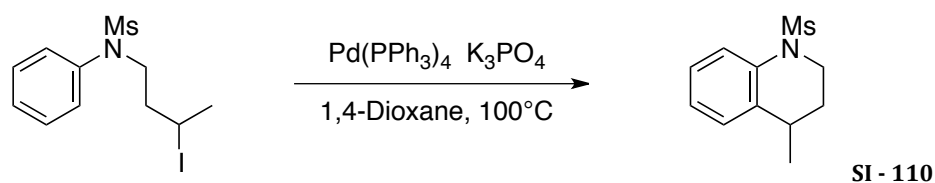

**N-(3-iodobutyl)-n-phenylmethanesulfonamide.** Secondary iodide SI-48 was made to react with Pd(PPh<sub>3</sub>)<sub>4</sub> following C-H Alkylation Procedure A. The crude product was purified by flash chromatography using hexanes/ethyl acetate (20:1) to provide tetrahydroquinoline product SI-110 as a pale orange solid (32.0 mg, 57% Yield). **<sup>1</sup>H-NMR** (600 MHz, CDCl<sub>3</sub>): δ 7.73 (m, 1H), 7.27 (m, 1H), 7.21 (m, 1H), 7.14 (m, 1H), 3.85 (m, 2H), 3.00 (m, 1H), 2.93 (s, 3H), 2.12 (m, 1H), 1.39 (d, J = 6.6 Hz, 3H). **<sup>13</sup>C-NMR** (100 MHz, CDCl<sub>3</sub>): δ 136.28, 134.16, 128.53, 126.86, 124.59, 122.49, 44.16, 38.69, 30.69, 30.29, 22.23. **IR** (Thin Film, cm<sup>-1</sup>): 2931, 2360, 1487, 1339, 1156, 957, 839, 773. **LRMS** (ESI): Calculated for [C<sub>11</sub>H<sub>15</sub>NO<sub>2</sub>SH]<sup>+</sup> 226.09, found 226.09.

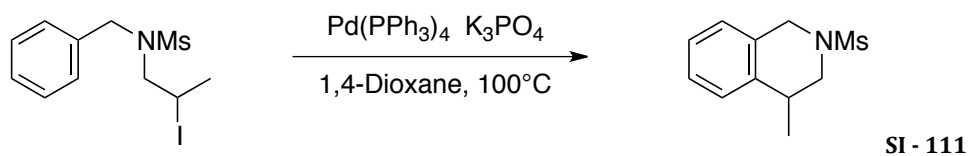

**N-benzyl-n-(2-iodopropyl)methanesulfonamide.** Secondary iodide SI-49 was made to react with Pd(PPh<sub>3</sub>)<sub>4</sub> following C-H Alkylation Procedure A. The crude product was purified by flash chromatography using hexanes/ethyl acetate (20:1) to provide tetrahydroisoquinoline product SI-111 as a pale orange solid (34.2 mg, 61% Yield). **<sup>1</sup>H-NMR** (600 MHz, CDCl<sub>3</sub>): δ 7.28-7.22 (m, 3H), 7.11 (d, J = 7.2 Hz, 1H), 4.55 (d, J = 15.0 Hz, 1H), 4.38 (d, J = 15.0 Hz, 1H), 3.50 (m, 1H), 3.56 (m, 1H), 3.14 (m, 1H), 3.87 (s, 3H), 1.39 (d, J = 6.6 Hz, 3H). **<sup>13</sup>C-NMR** (100 MHz, CDCl<sub>3</sub>): δ 138.60, 131.09, 127.92, 127.15, 126.46, 126.24, 49.72, 47.62, 35.25, 32.93, 20.14. **IR** (Thin Film, cm<sup>-1</sup>): 2965, 2928, 1454, 1329, 1156, 1037, 961, 808, 754, 519. **LRMS** (ESI): Calculated for [C<sub>11</sub>H<sub>15</sub>NO<sub>2</sub>SH]<sup>+</sup> 226.09, found 226.09.

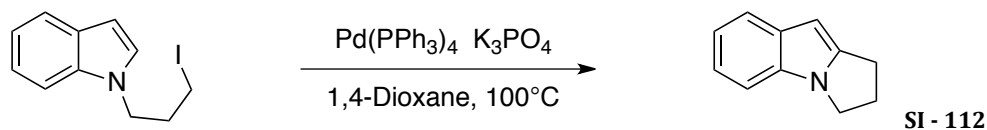

**N-(3-iodopropyl)indole.** Primary iodide SI-77 was made to react with Pd(PPh<sub>3</sub>)<sub>4</sub> following C-H Alkylation Procedure A. The yield of the crude product was determined by NMR spectroscopy using 1,3,5-trimethoxybenzene as internal standard (51% Yield). All physical and spectroscopic data were in accordance with the literature data.<sup>18</sup>

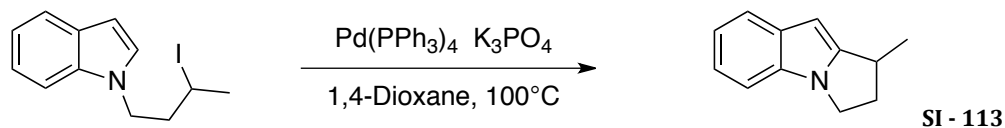

**N-(3-iodobutyl)indane.** Secondary iodide SI-83 was made to react with Pd(PPh<sub>3</sub>)<sub>4</sub> following C-H Alkylation Procedure A. The yield of the crude product was determined by NMR spectroscopy using 1,3,5-trimethoxybenzene as internal standard (71% Yield). All physical and spectroscopic data were in accordance with the literature data.<sup>19</sup>

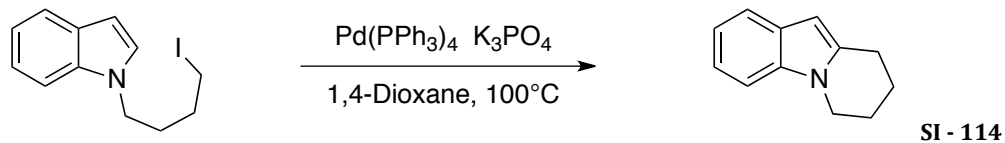

**N-(4-iodobutyl)indane.** Primary iodide SI-78 was made to react with Pd(PPh<sub>3</sub>)<sub>4</sub> following C-H Alkylation Procedure A. The yield of the crude product was determined by NMR spectroscopy using 1,3,5-trimethoxybenzene as internal standard (70% Yield). All physical and spectroscopic data were in accordance with the literature data.<sup>20</sup>

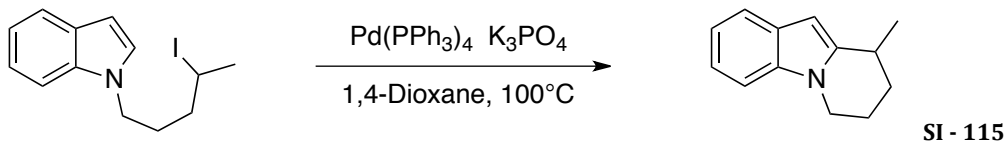

**N-(4-iodopentyl)indane.** Secondary iodide SI-84 was made to react with Pd(PPh<sub>3</sub>)<sub>4</sub> following C-H Alkylation Procedure A. The yield of the crude product was determined by NMR spectroscopy using 1,3,5-trimethoxybenzene as internal standard (90% Yield). All physical and spectroscopic data were in accordance with the literature data.<sup>19</sup>

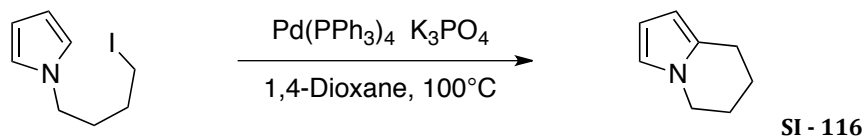

**N-(4-iodobutyl)pyrrole.** Primary iodide SI-86 was made to react with Pd(PPh<sub>3</sub>)<sub>4</sub> following C-H Alkylation Procedure A. The yield of the crude product was determined by NMR spectroscopy using 1,3,5-trimethoxybenzene as internal standard (64% Yield). All physical and spectroscopic data were in accordance with the literature data.<sup>21</sup>

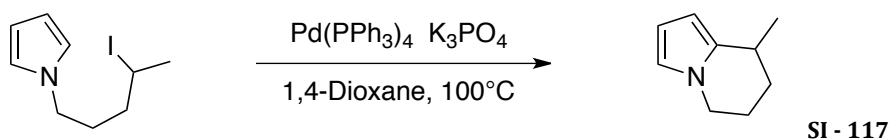

**N-(4-iodopentyl)pyrrole.** Secondary iodide SI-89 was made to react with Pd(PPh<sub>3</sub>)<sub>4</sub> following C-H Alkylation Procedure A. The yield of the crude product was determined by NMR spectroscopy using 1,3,5-trimethoxybenzene as internal standard (95% Yield). All physical and spectroscopic data were in accordance with the literature data.<sup>16</sup>

## Stereochemical Experiments

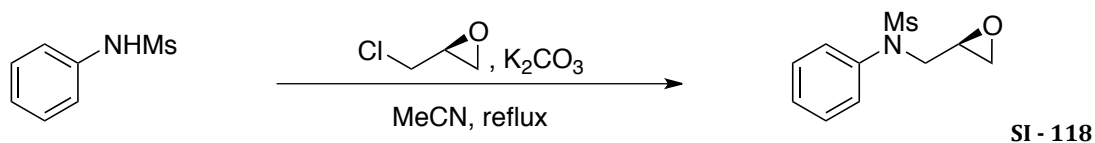

**(SI-118): N-((S)-2,3-epoxypropyl)-n-phenylmethanesulfonamide.** Following General Procedure B, methanesulfonamide SI-1 (3.0 g, 17.5 mmol) was alkylated with S-(+)-epichlorohydrin (6.5 g, 70 mmol). The crude product was purified by flash chromatography using hexanes/ethyl acetate (3:1) to provide epoxide SI-118 as a white solid (61% Yield).

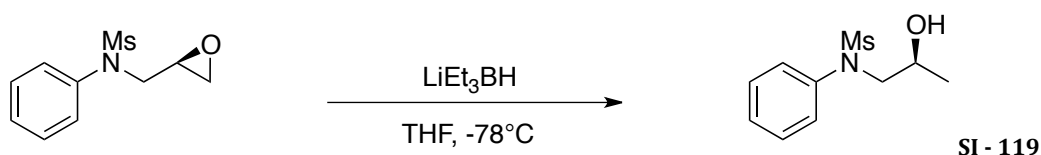

**(SI-119): N-((S)-2-hydroxypropyl)-n-phenylmethanesulfonamide.** Following General Procedure D, epoxide SI-118 (2.45 g, 10.7 mmol) was reduced with super hydride (1M in THF, 12.9 mL, 12.9 mmol). The crude product was purified by flash chromatography using hexanes/ethyl acetate (1:1) to provide secondary alcohol SI-119 as a white solid (58% Yield).

**Chiral HPLC** (Column IC, 75:25 A1:B2): ee = 88.3%.

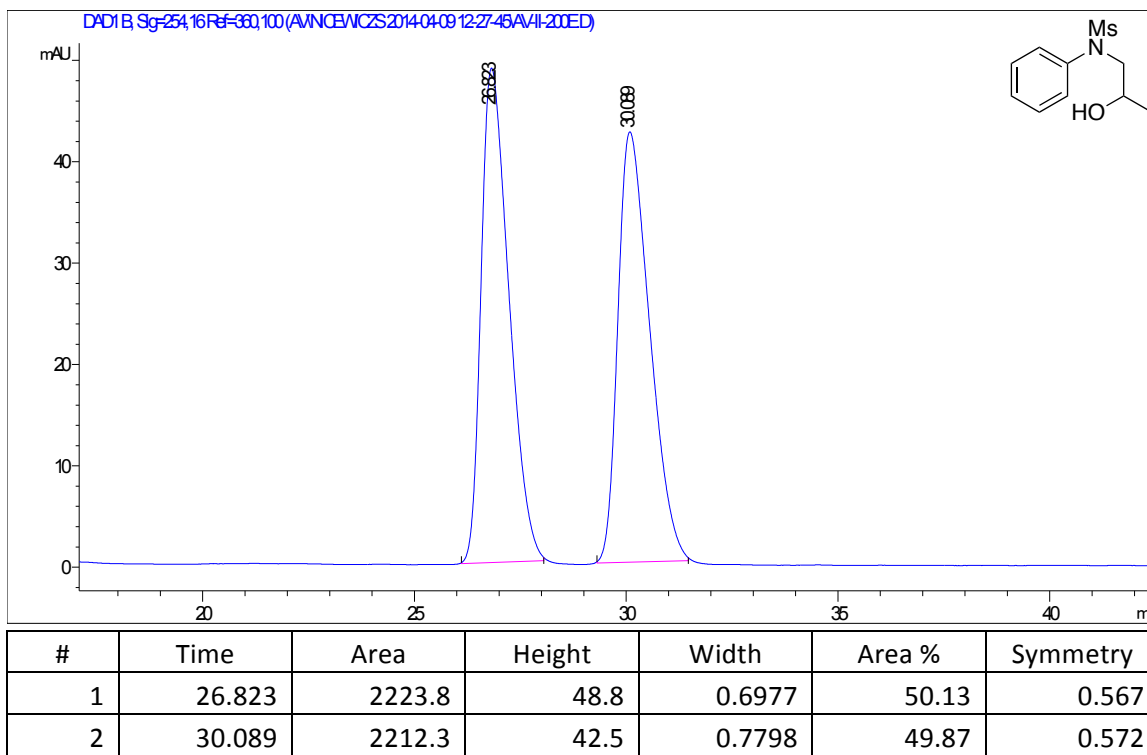



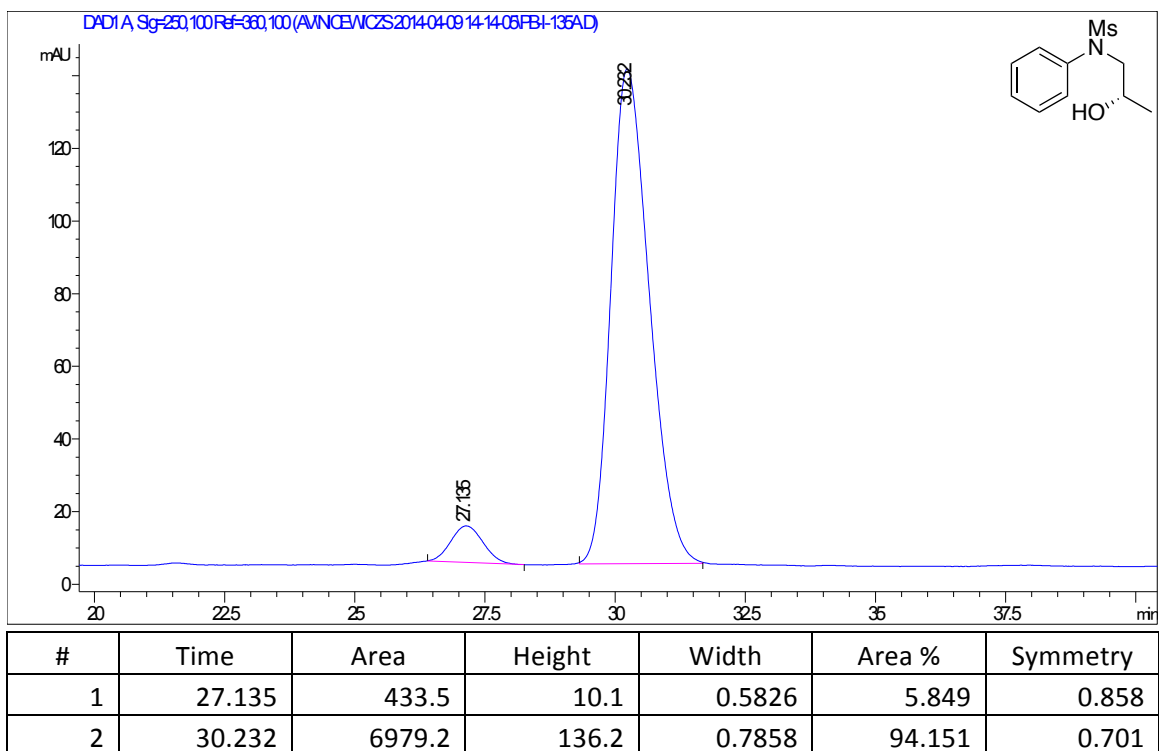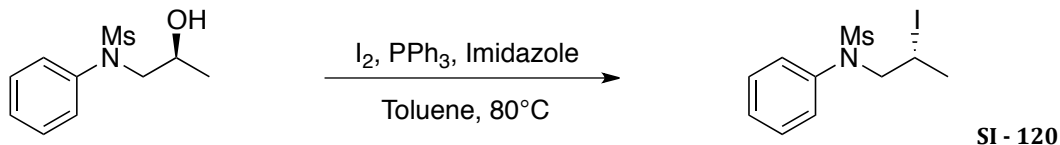

**(SI-120): N-((R)-2-iodopropyl)-n-phenylmethanesulfonamide.** Secondary alcohol SI-119 (1.4 g, 6.2 mmol) was iodinated with molecular iodine (1.7 g, 6.5 mmol) following General Procedure E. The crude product was purified by flash chromatography using hexanes/ethyl acetate (3:1) to provide secondary iodide SI-120 as a white solid (52% Yield). **Optical Rotation:**  $\alpha_D^{20} = +0.4196$ .

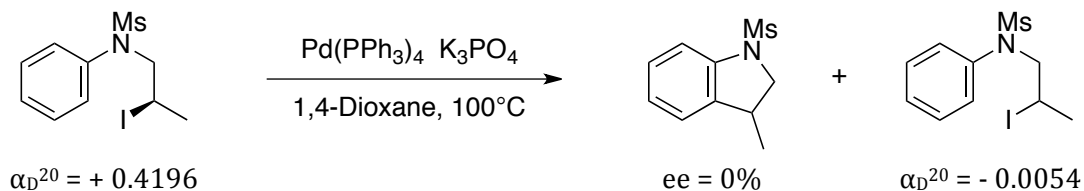

Secondary iodide SI-120 was made to react incompletely with  $\text{Pd}(\text{PPh}_3)_4$  following C-H Alkylation Procedure A. The crude product was purified by flash chromatography using hexanes/ethyl acetate (20:1) to provide indoline cyclization product and unreacted starting material. The enantiomeric excess of the indoline product was determined to be 0% by chiral

HPLC analysis using 90:10 A1:B2 mobile phase and column IA. The recovered starting material was also determined to have racemized by measurement of its optical rotation ( $\alpha_D^{20} = -0.0054$ ). By contrast, stereochemistry of the starting material was retained when iodide SI-120 was treated with potassium iodide in the absence of palladium ( $\alpha_D^{20} = +0.4226$ ).

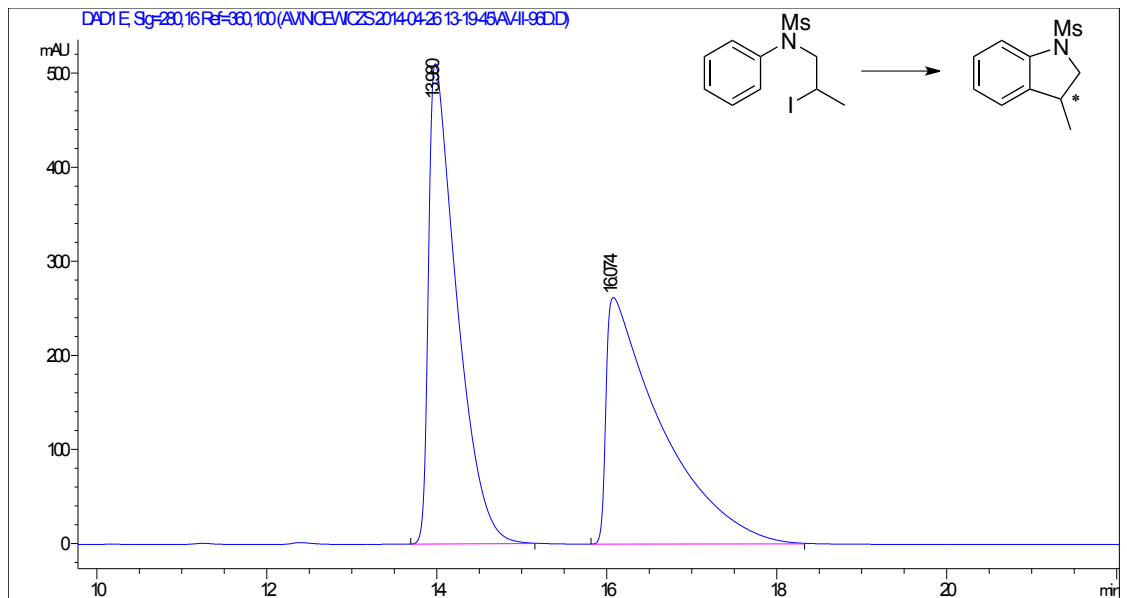

| # | Time   | Area    | Height | Width  | Area % | Symmetry |
|---|--------|---------|--------|--------|--------|----------|
| 1 | 13.98  | 11846   | 510.7  | 0.3386 | 50.014 | 0.295    |
| 2 | 16.074 | 11839.4 | 262.2  | 0.6029 | 49.986 | 0.133    |

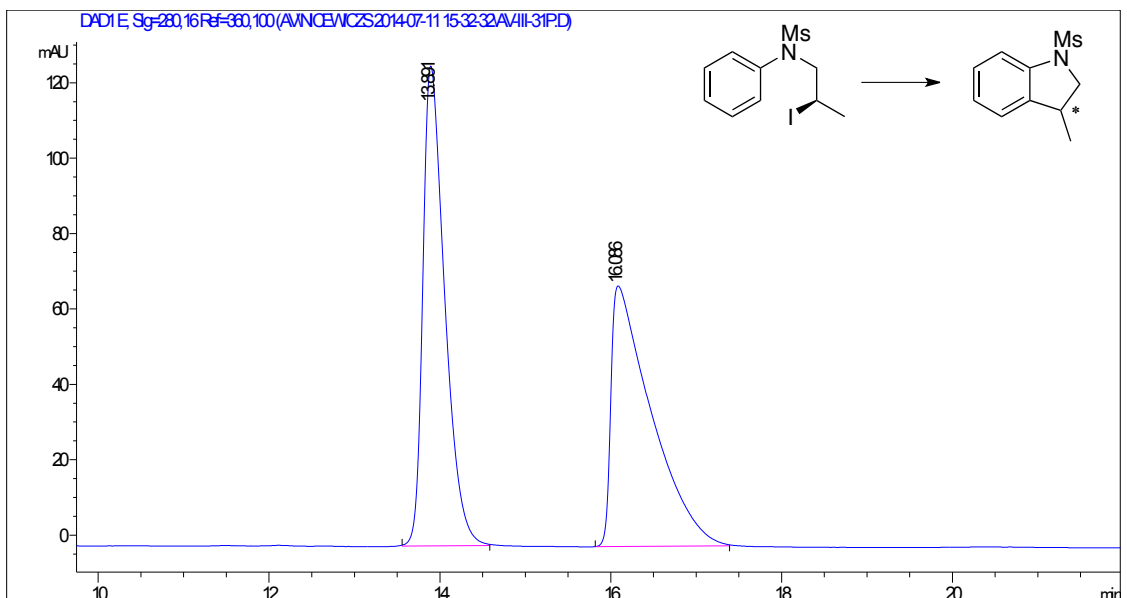

| # | Time   | Area   | Height | Width  | Area % | Symmetry |
|---|--------|--------|--------|--------|--------|----------|
| 1 | 13.891 | 2270.8 | 127.4  | 0.27   | 50.05  | 0.535    |
| 2 | 16.086 | 2266.3 | 69.2   | 0.4483 | 49.95  | 0.2      |

## Proposed Rearrangement Mechanism

The following mechanism is proposed as an explanation for the formation of two products in equal quantities by *ortho*-substituted aromatic substrate **16**. Upon activation of the alkyl iodide, radical addition occurs irreversibly at both available sites with no regioselectivity. In each case, Pd<sup>I</sup> oxidizes the alkyl radical to a cationic species. While one regioisomer can rearomatize upon oxidation, forming the expected product **17**, the intermediate forming a quaternary carbon center is not able to. This intermediate instead undergoes a 1,2-methyl shift, forming a cation that is then capable of rearomatization, forming the observed rearrangement product, **18**.

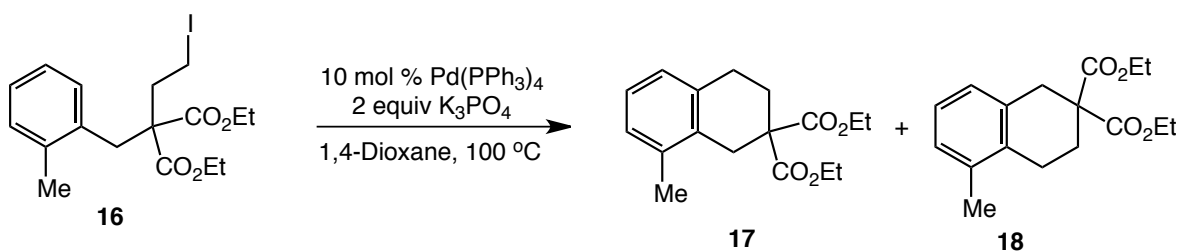

Mechanism accounting for product **18**:

75% combined yield, **17**:**18** = 50:50

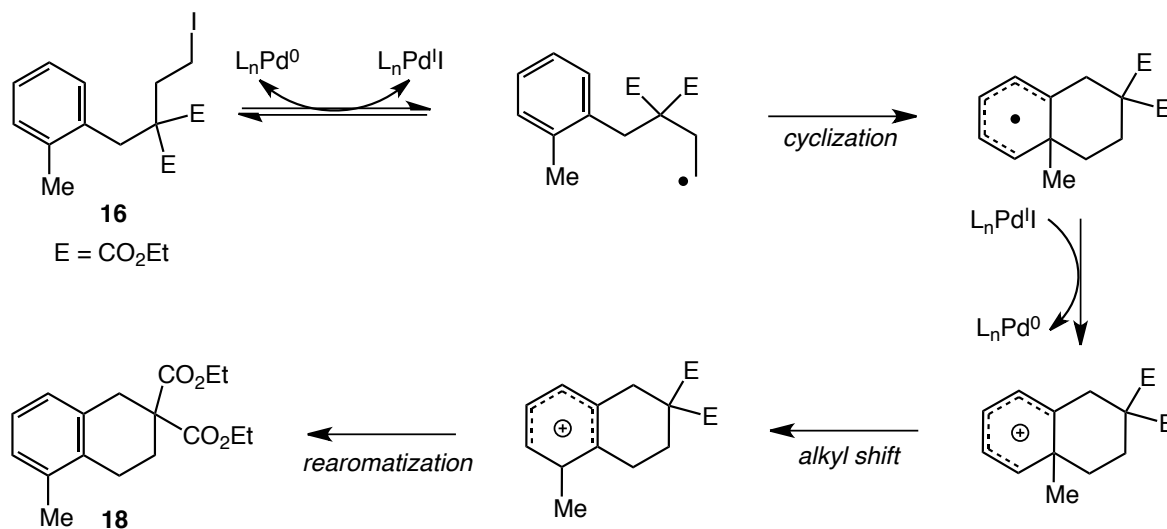

## References

1. Wang, Y.; Guziec, F.S. *J. Org. Chem.* **2001**, 8293-8296.
2. Rudolph, A.; Rackelmann, N.; Lautens, M. *Angew. Chem. Intl. Ed.* **2007**. 46, 1485-1488.
3. Tan, B.Y.; Teo, Y.; Seow, A. *Eur. J. Org. Chem.* **2014**. 7, 1541-1546.
4. Crawford, S.M.; Lavery, C.B.; Stradiotto, M. *Chem. Eur. J.* **2014**. 19, 16760-16771.
5. Rosen, B.R.; Ruble, J.C.; Beauchamp, T.J.; Navarro, A. *Org. Lett.* **2011**. 13, 2564-2567.
6. O'Sullivan, S.; Doni, E.; Tuttle, T.; Murphy, J.A. *Angew. Chem. Intl. Ed.* **2014**. 53, 474-478.
7. Wu, L.; Lal, J.; Simon, K.A.; Burton, E.A.; Luk, Y.Y. *J. Am. Chem. Soc.* **2009**. 131, 7430-7443.
8. Yudin, A.K.; Chiang, J.P.; Adolfsson, H.; Copéret, C. *J. Org. Chem.* **2001**. 66, 4713-4718.
9. Kimura, M.; Masuda, T.; Yamada, K.; Mitani, M.; Kubota, N.; Kawakatsu, N.; Kishii, K.; Inazu, M.; Kiuchi, Y.; Oguchi, K.; Namiki, T. *Biol. Med. Chem.* **2003**. 11, 3953-3963.
10. Inés, B.; Palomas, D.; Holle, S.; Steinberg, S.; Nicasio, J.A.; Alcarazo, M. *Angew. Chem. Intl. Ed.* **2012**. 51, 12367-12369.
11. Boehme, T.M.; Keim, C.; Kreutzmann, K.; Linder, M.; Dingermann, T.; Dannhardt, G.; Mutschler, E.; Lambrecht, G. *J. Med. Chem.* **2003**. 46, 856-867
12. Zhang, X.; De Los Angeles, J.E.; He, M.; Dalton, J.T.; Shams, G.; Lei, L.; Patil, P.N.; Feller, D.R.; Miller, D.D.; Hsu, F. *J. Med. Chem.* **1997**. 40, 3014-3024.
13. Kulbitski, K.; Nisnevich, G.; Gandelman, M.; *Adv. Synth. Catal.* **2011**. 353, 1438.
14. Murphy, J.A.; Schoenbeck, F.; Findlay, N.J.; Thomson, D.W.; Zhou, S.; Garnier, J. *J. Am. Chem. Soc.* **2009**. 131, 6475-6479.
15. Riegel, N.; Darcel, C.; Stephan, O.; Juge, S. *J. Organomet. Chem.* **1998**. 567, 219-233.
16. Ozaki, S.; Mitoh, S.; Ohmori, H. *Chem. Pharm. Bull.* **1996**. 44, 2020-2024.
17. Tanis, S.P.; Raggon, J.W. *J. Org. Chem.* **1987**. 52, 819-827.
18. Pearson, W.H.; Fang, W. *J. Org. Chem.* **2000**. 65, 7158-7174.
19. Dobbs, A.P.; Jones, K.; Veal, K.T. *Tetrahedron* **1998**. 54, 2149-2160.
20. Ishikura, M.; Ida, W.; Yanada, K. *Tetrahedron* **2006**. 62, 1015-1024.
21. Gracia, S.; Cazorla, C.; Metay, E.; Pellet-Rostaing, S.; Lemaire, M. *J. Org. Chem.* **2009**. 74, 3160-3163.

# <sup>1</sup>H and <sup>13</sup>C NMR Spectra

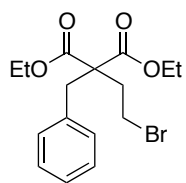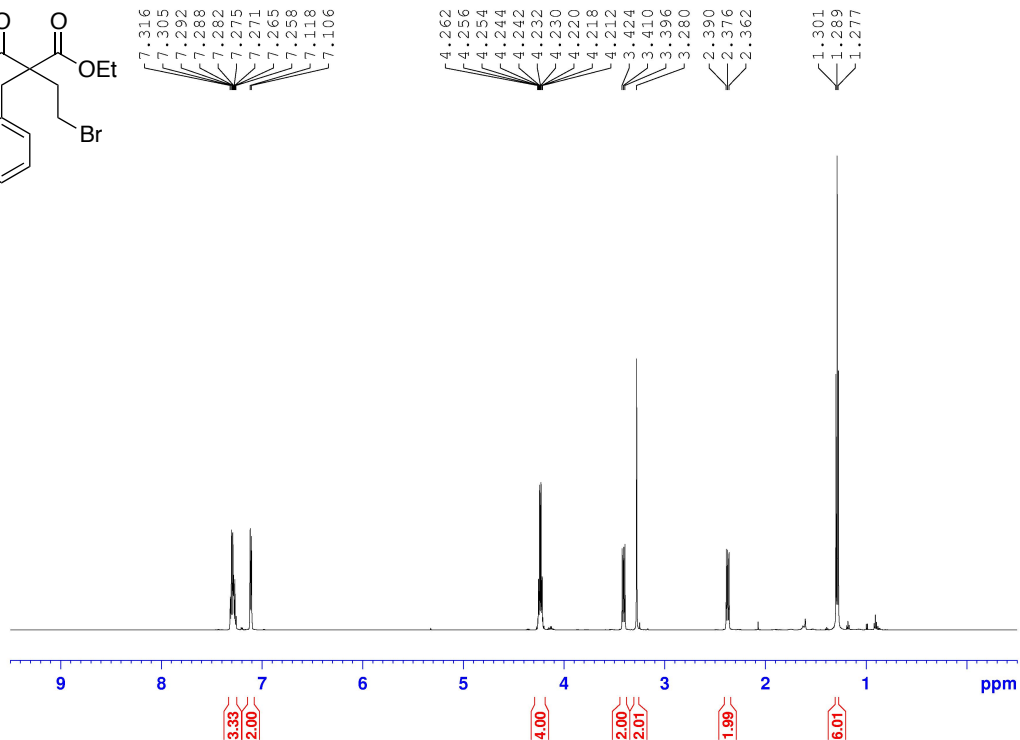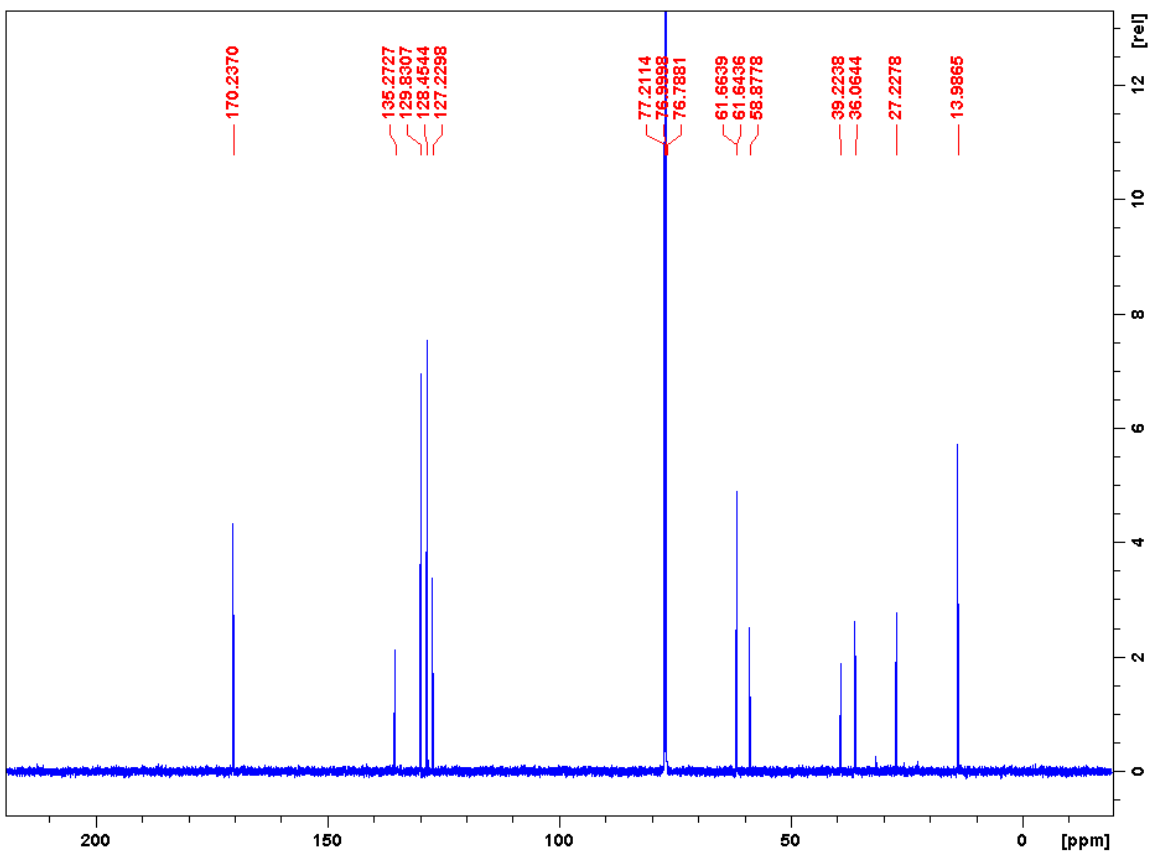

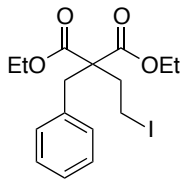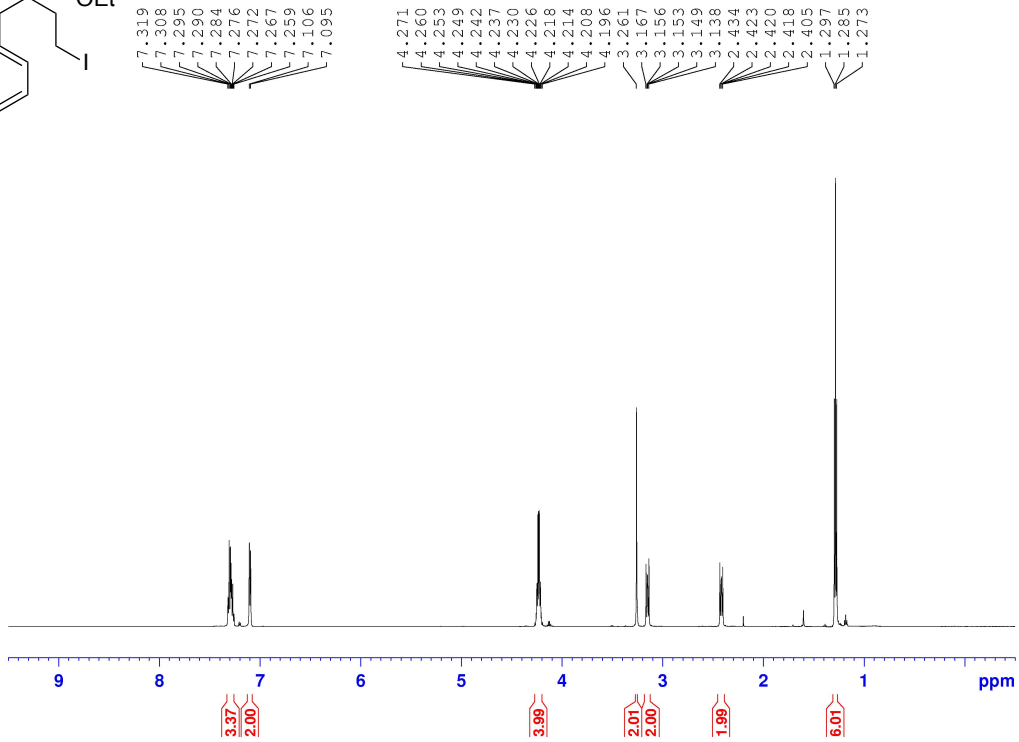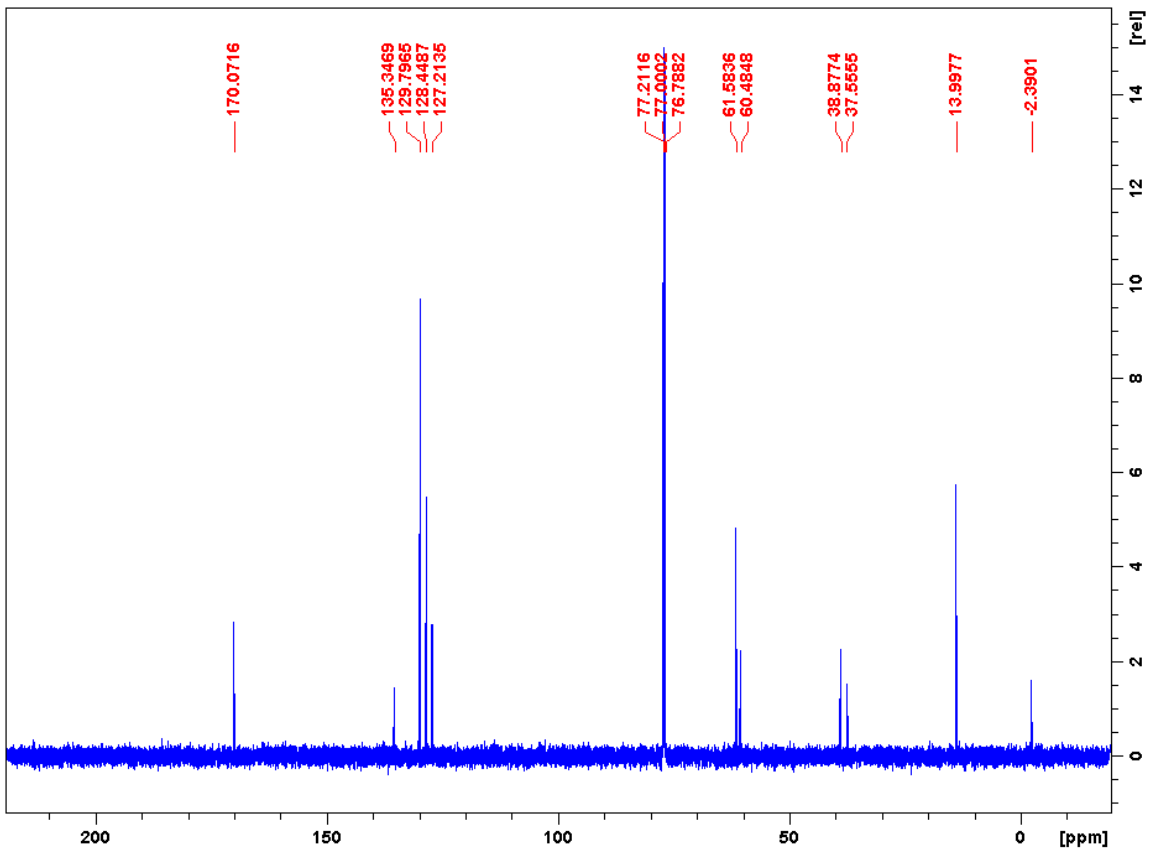

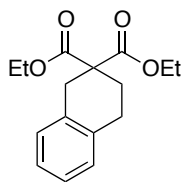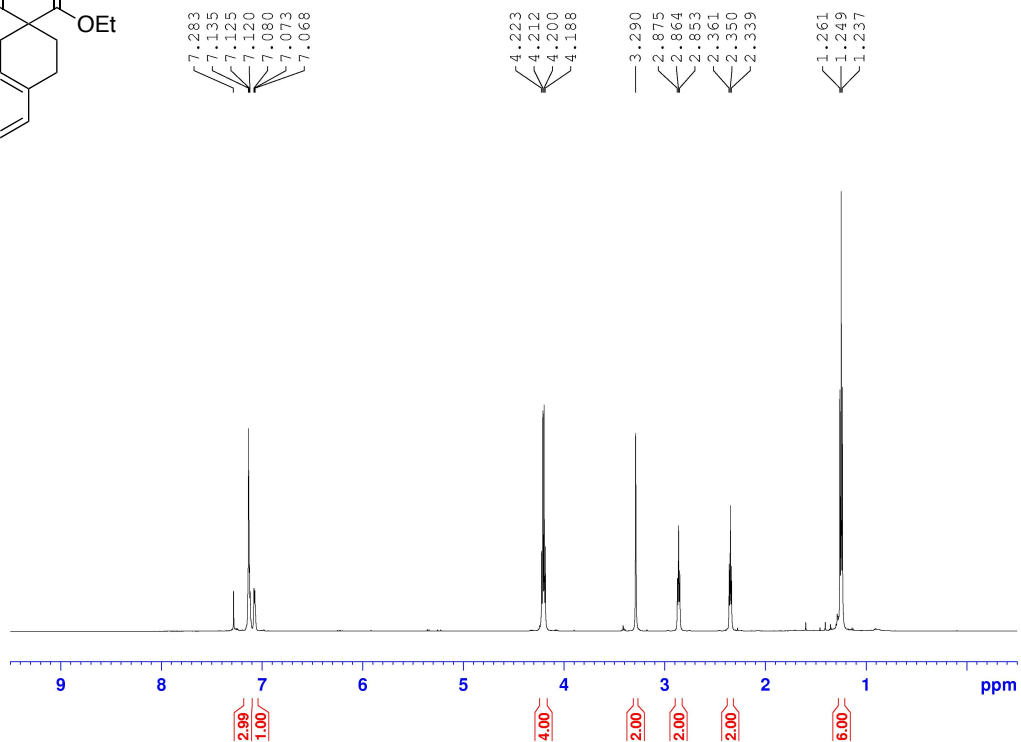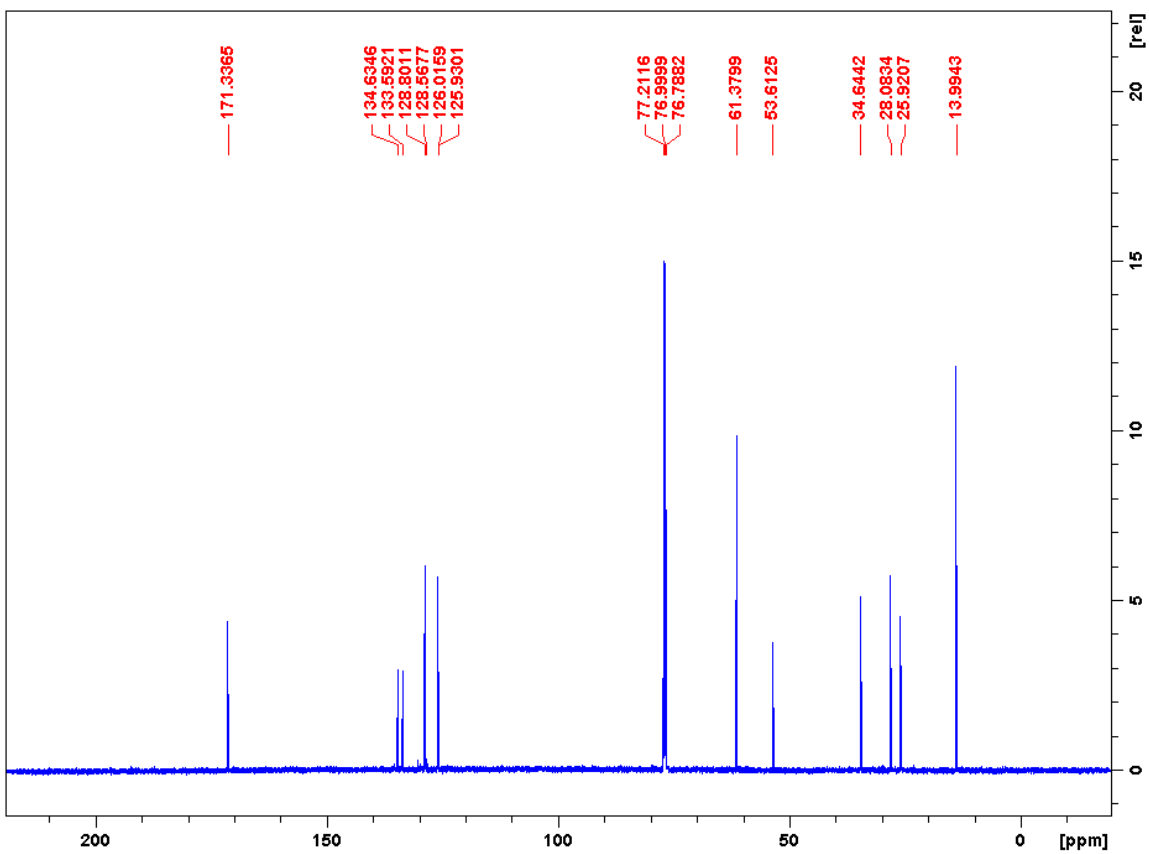

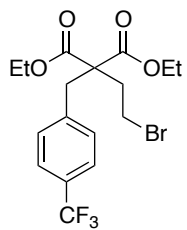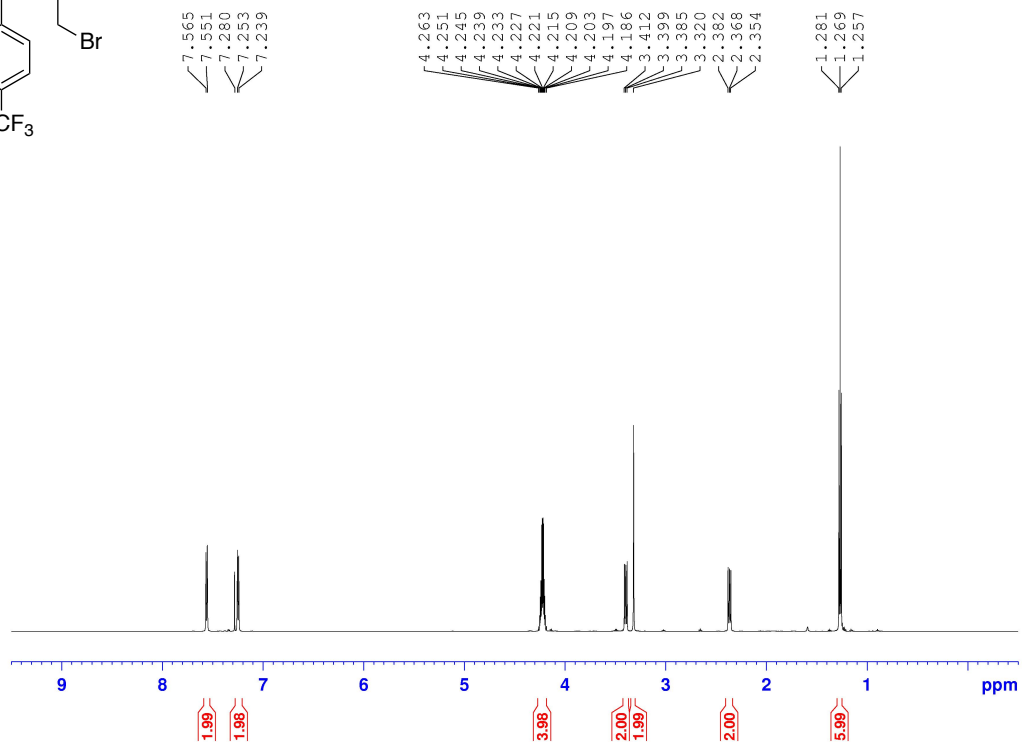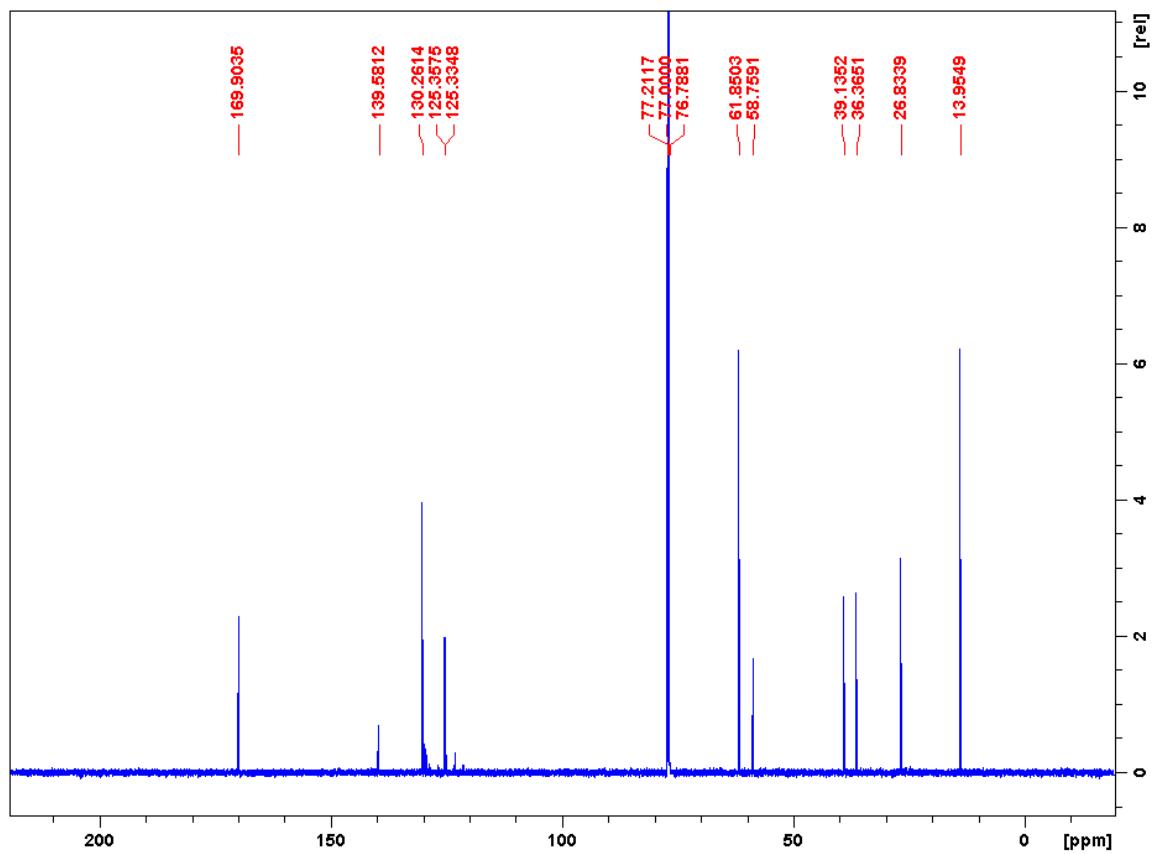



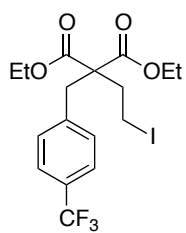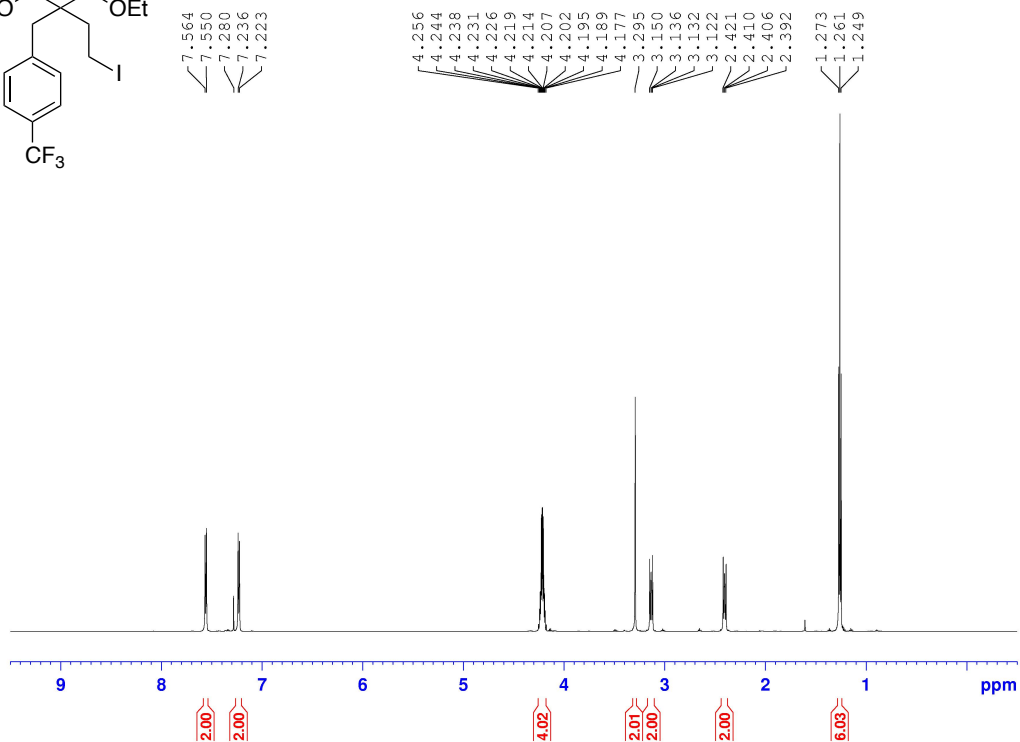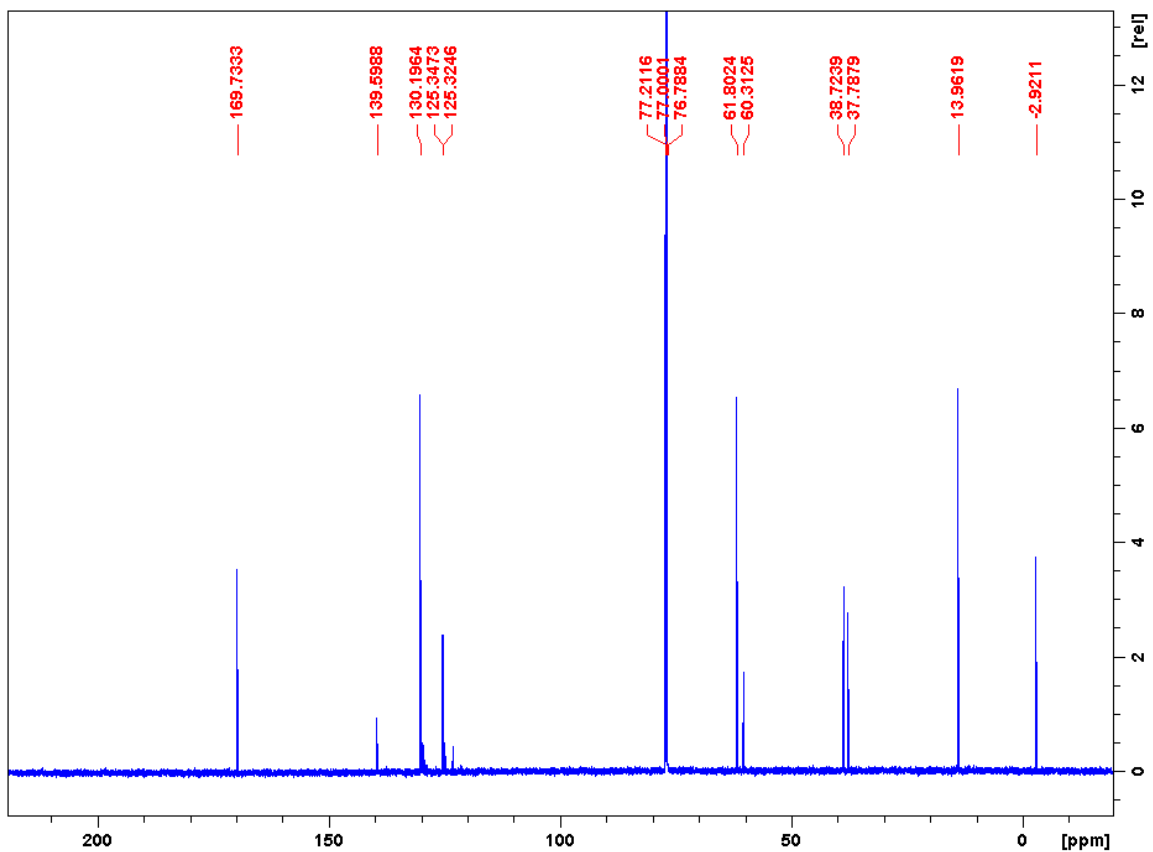

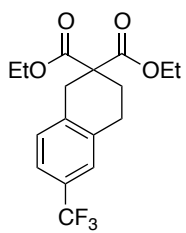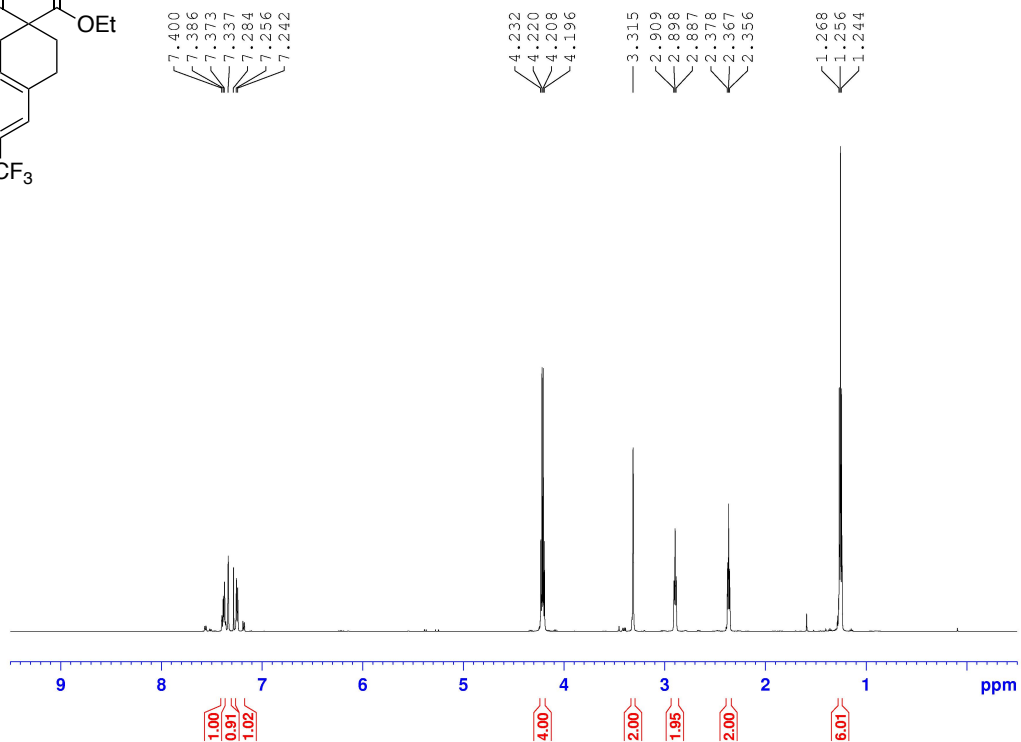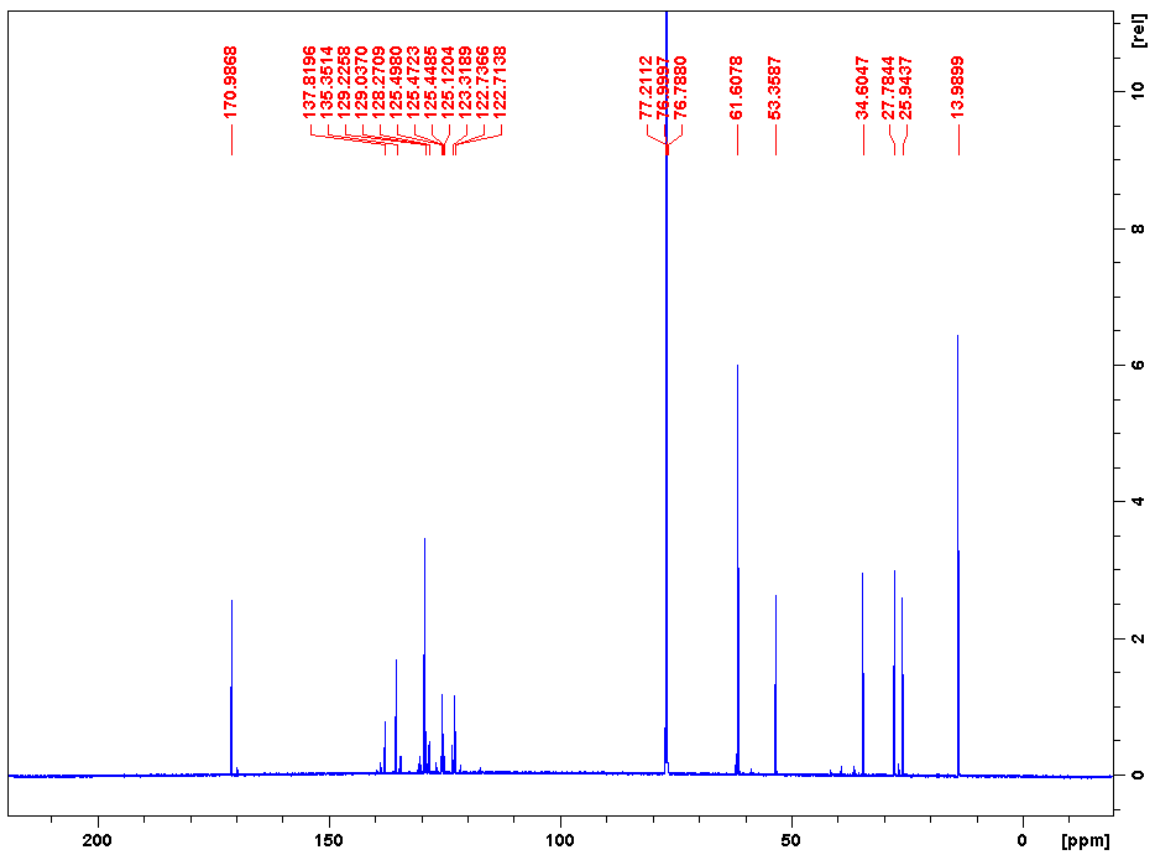

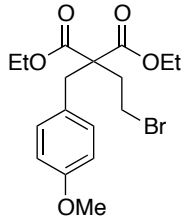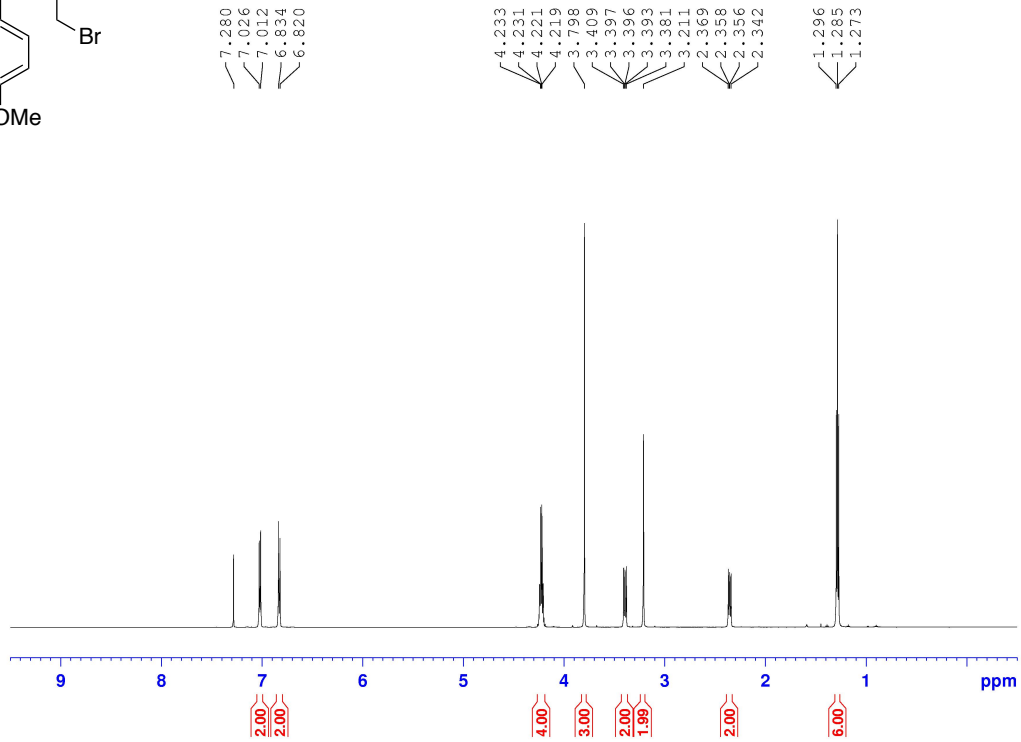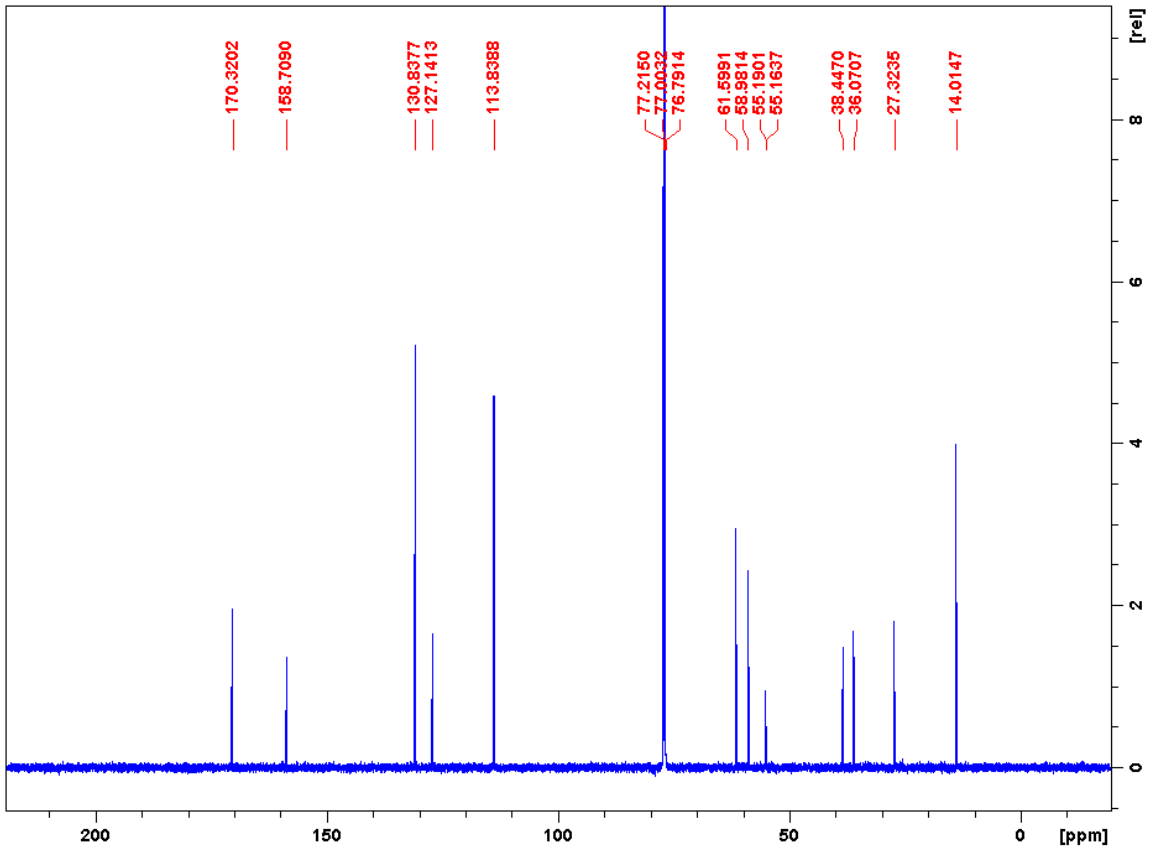

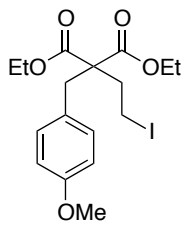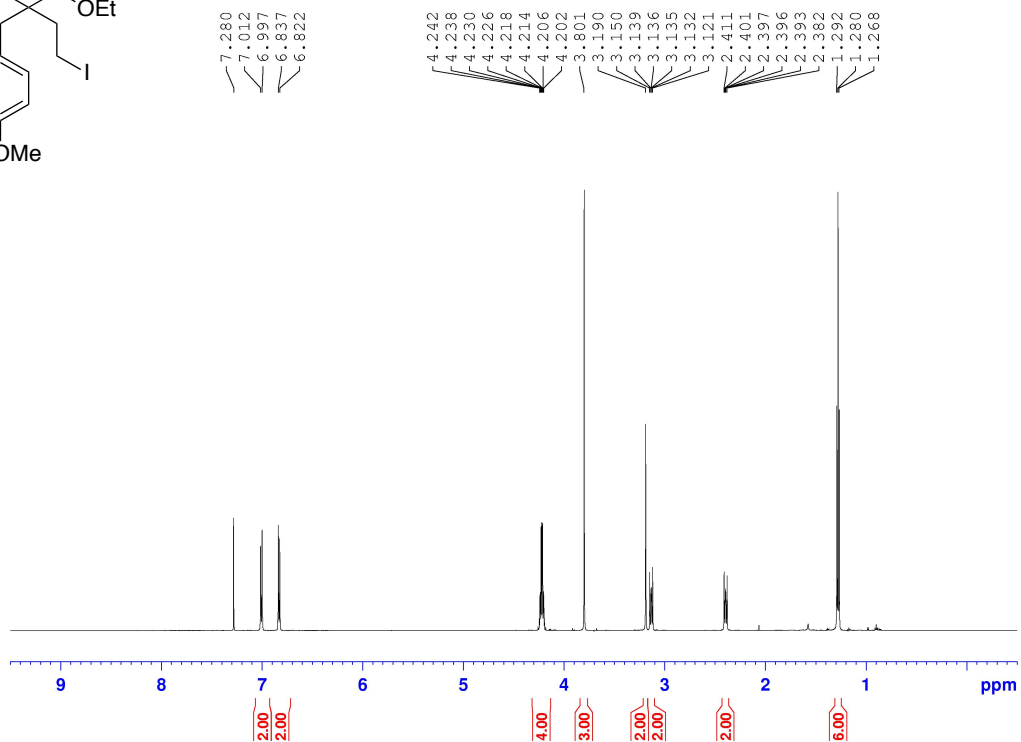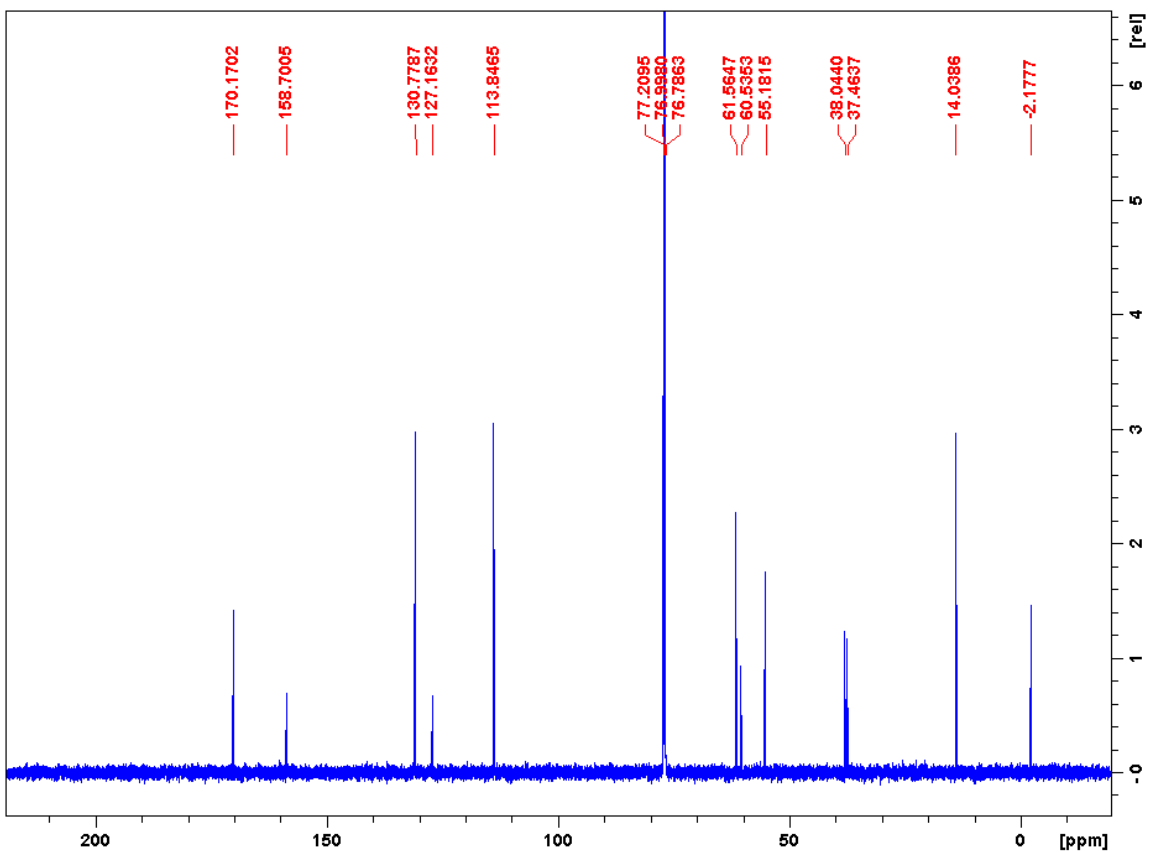

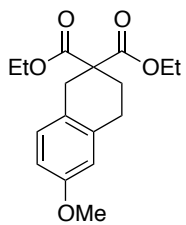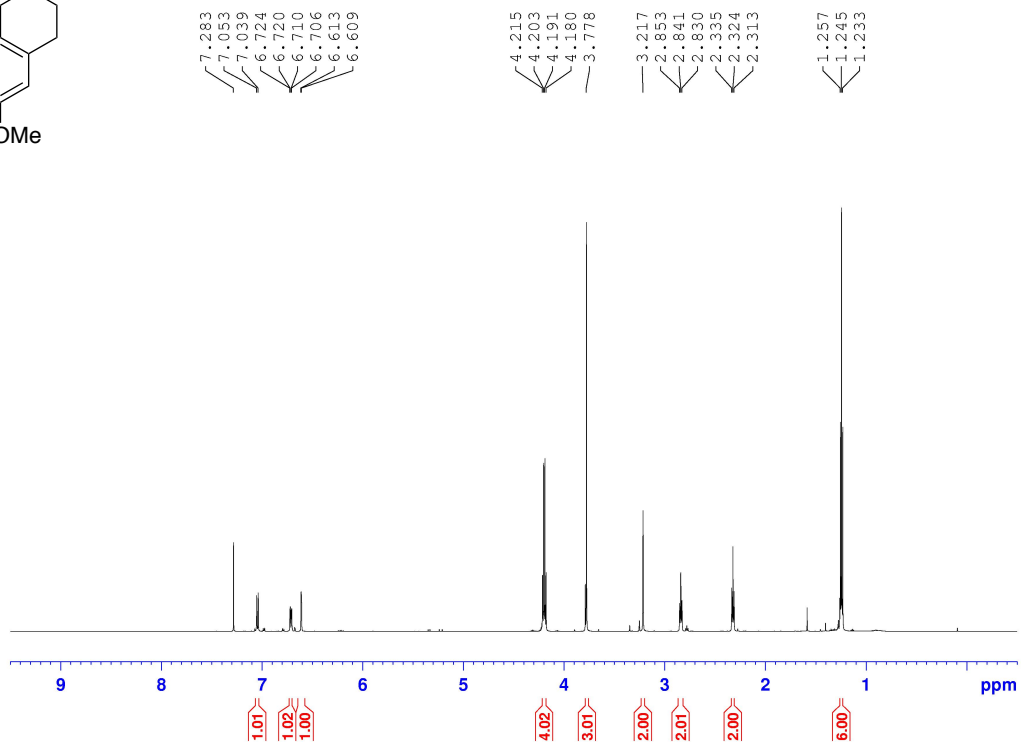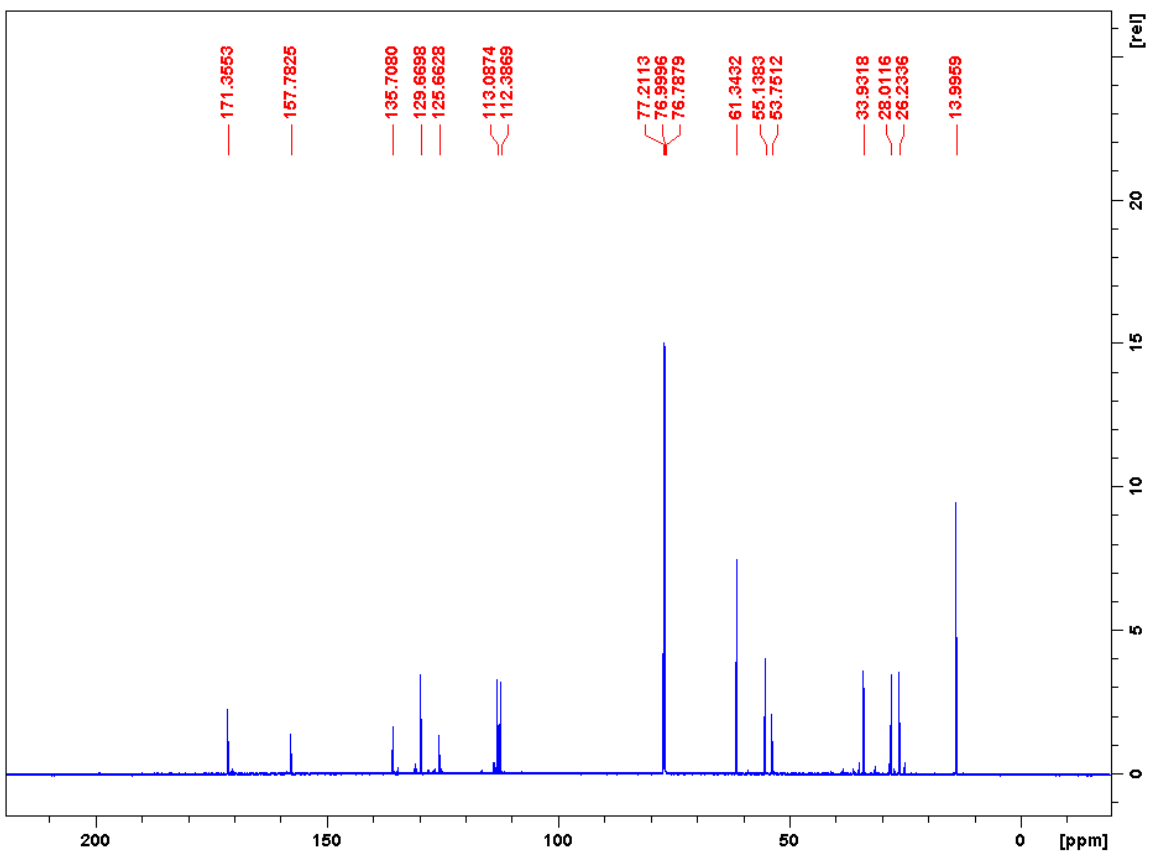

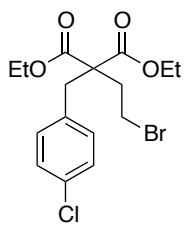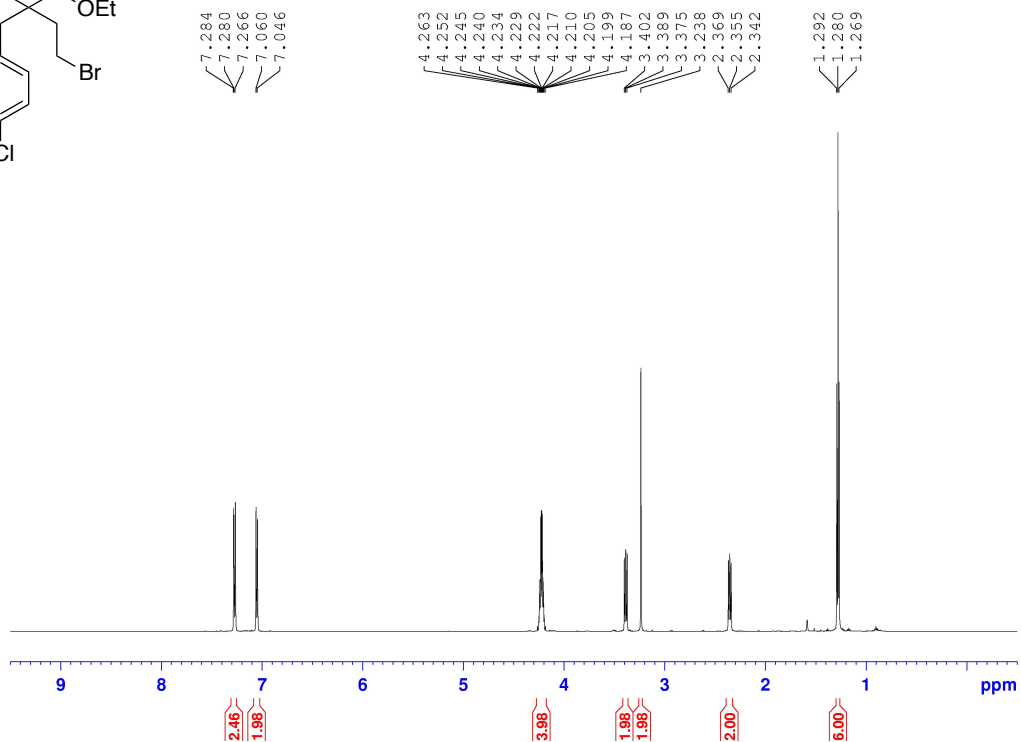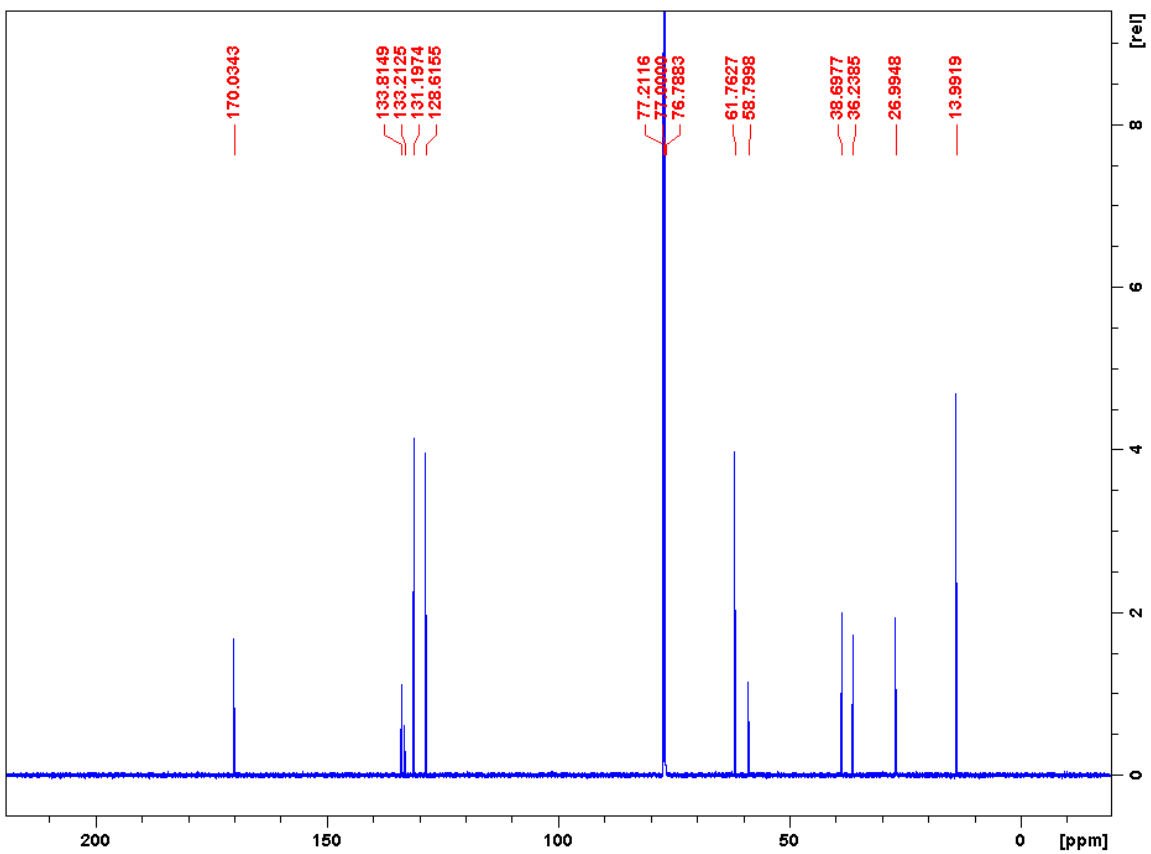

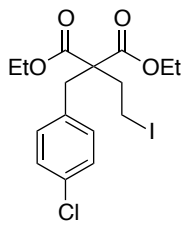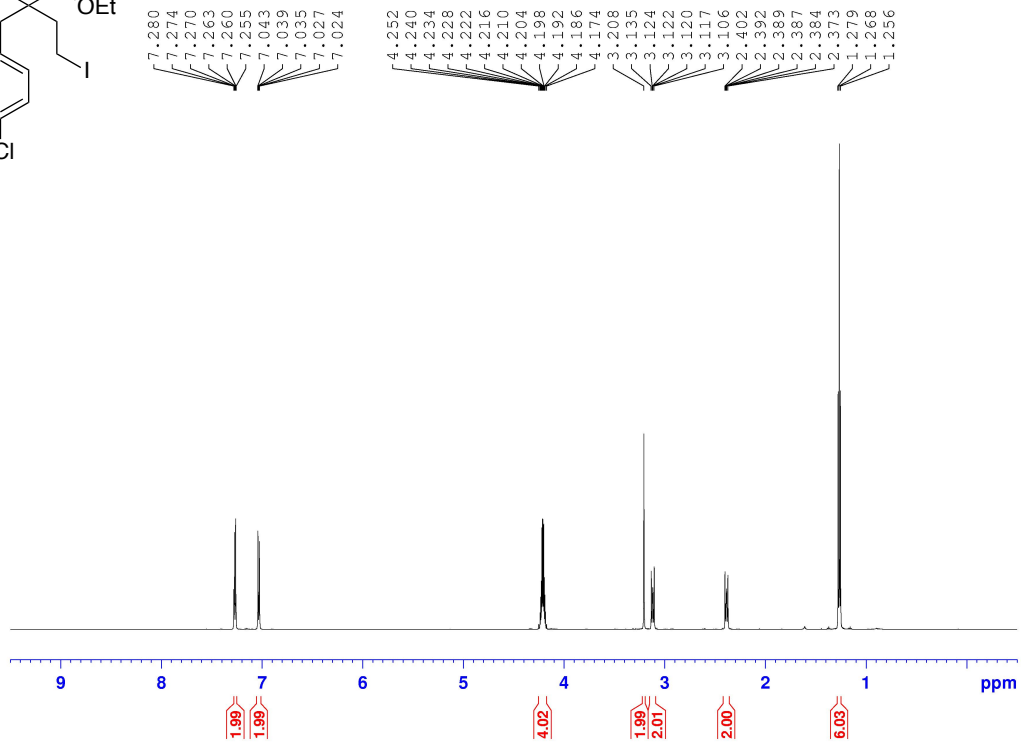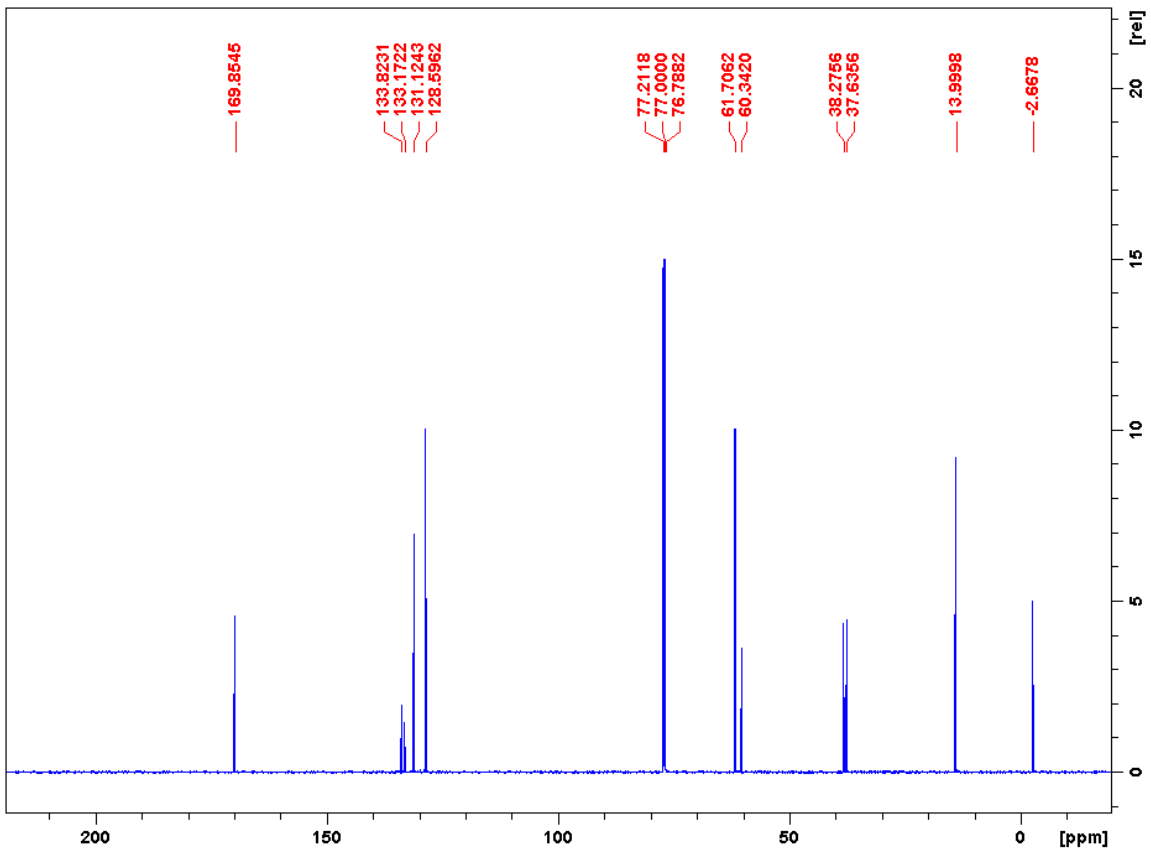

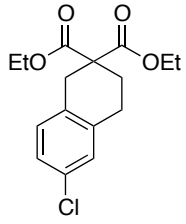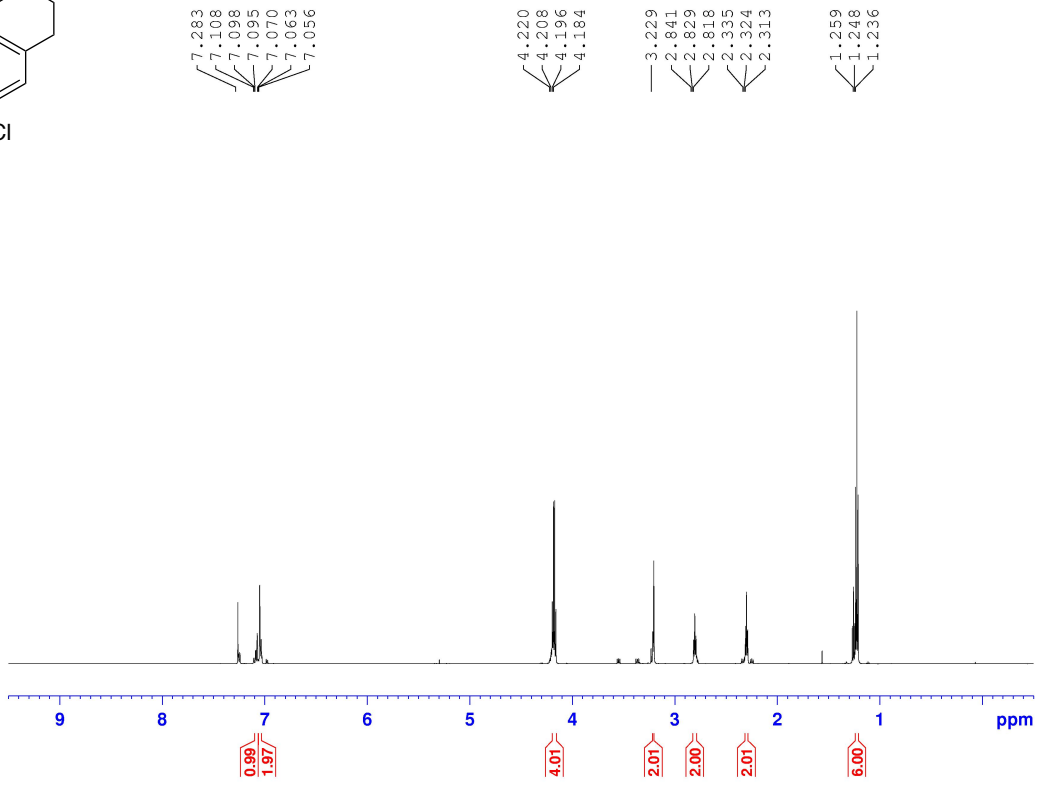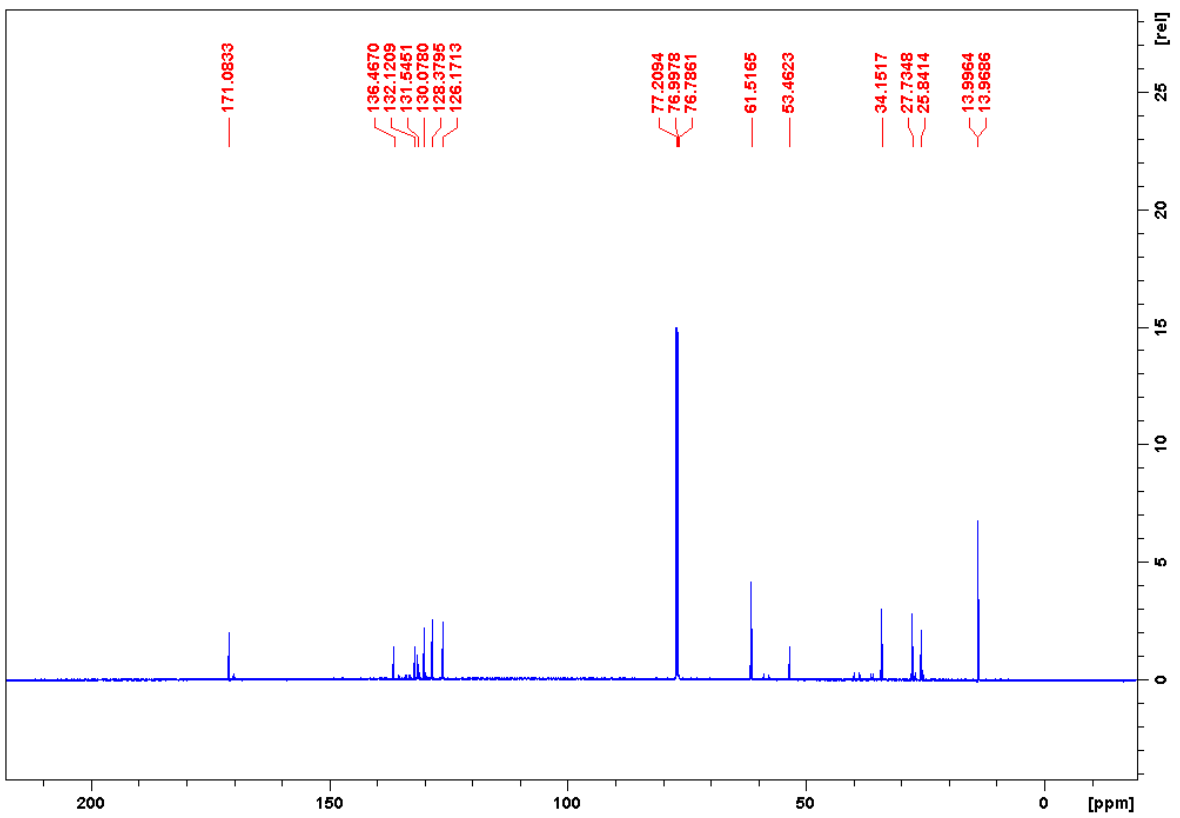



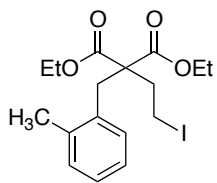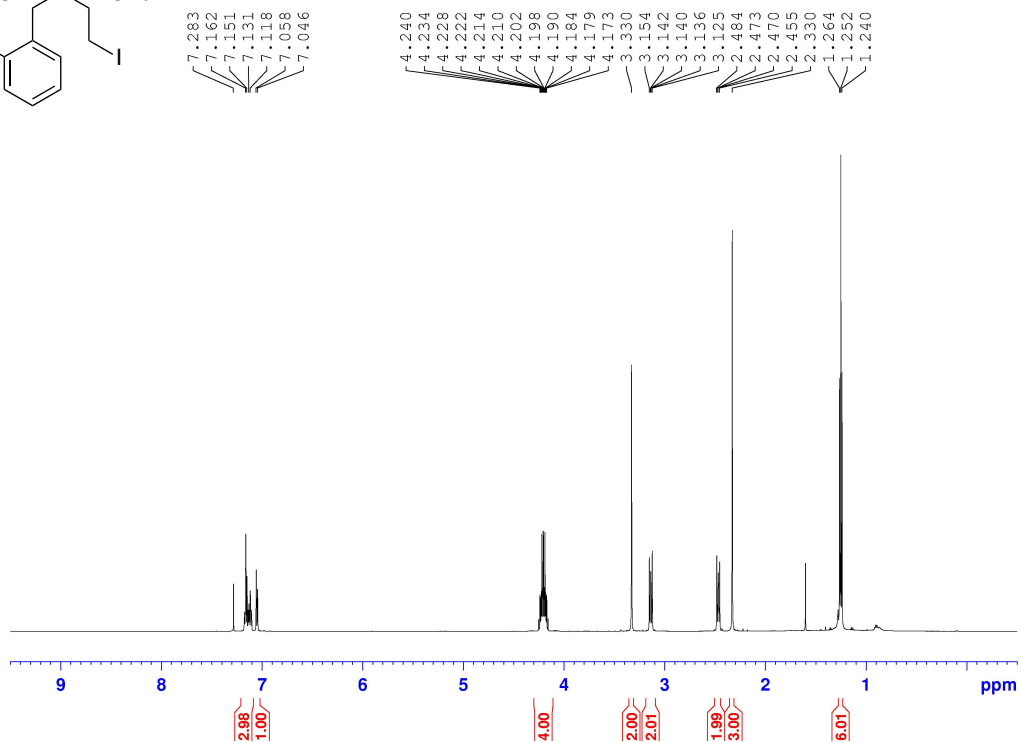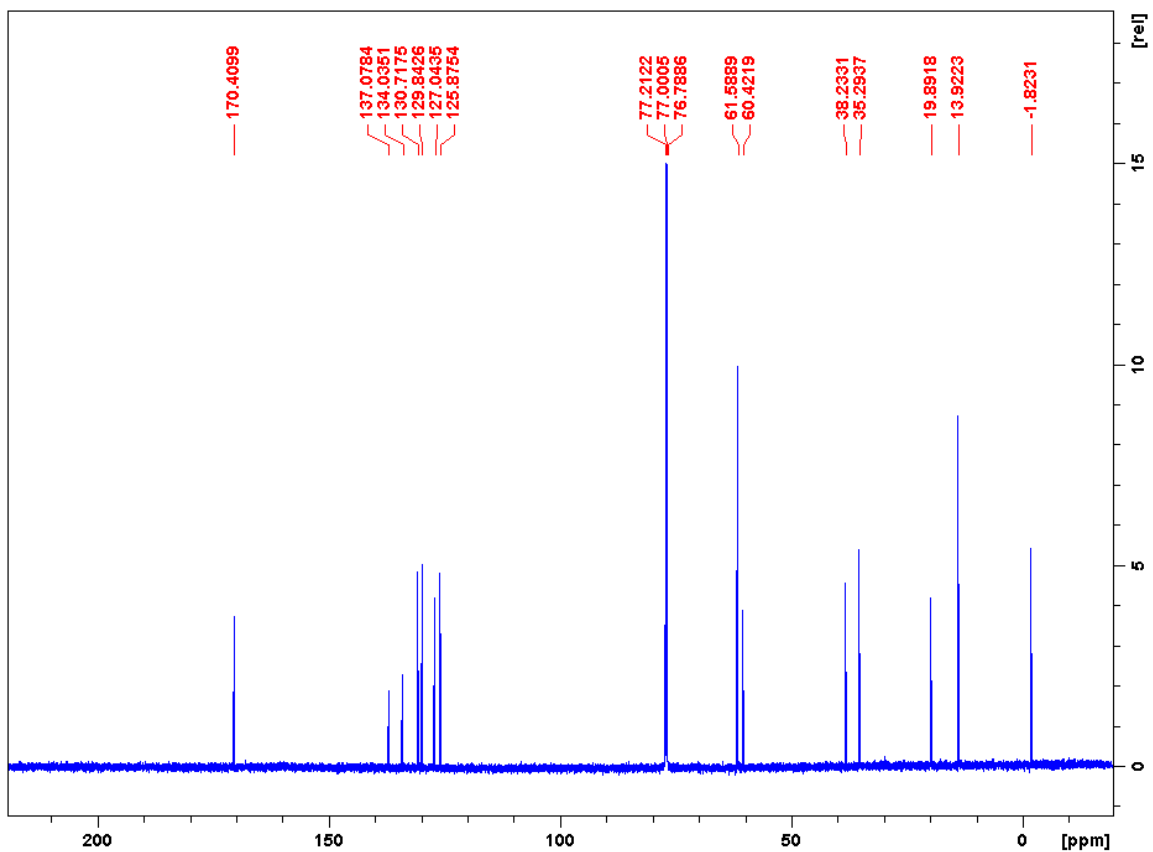

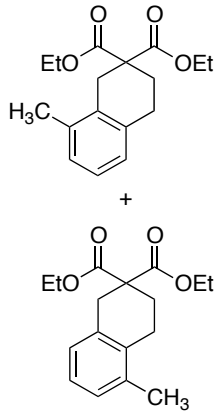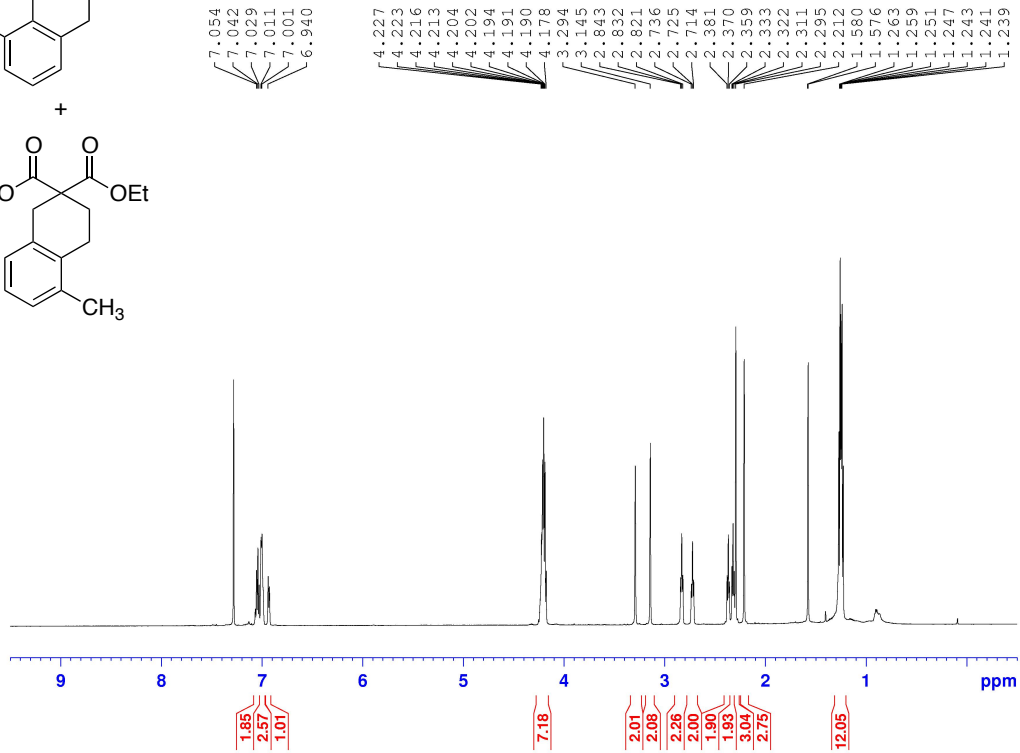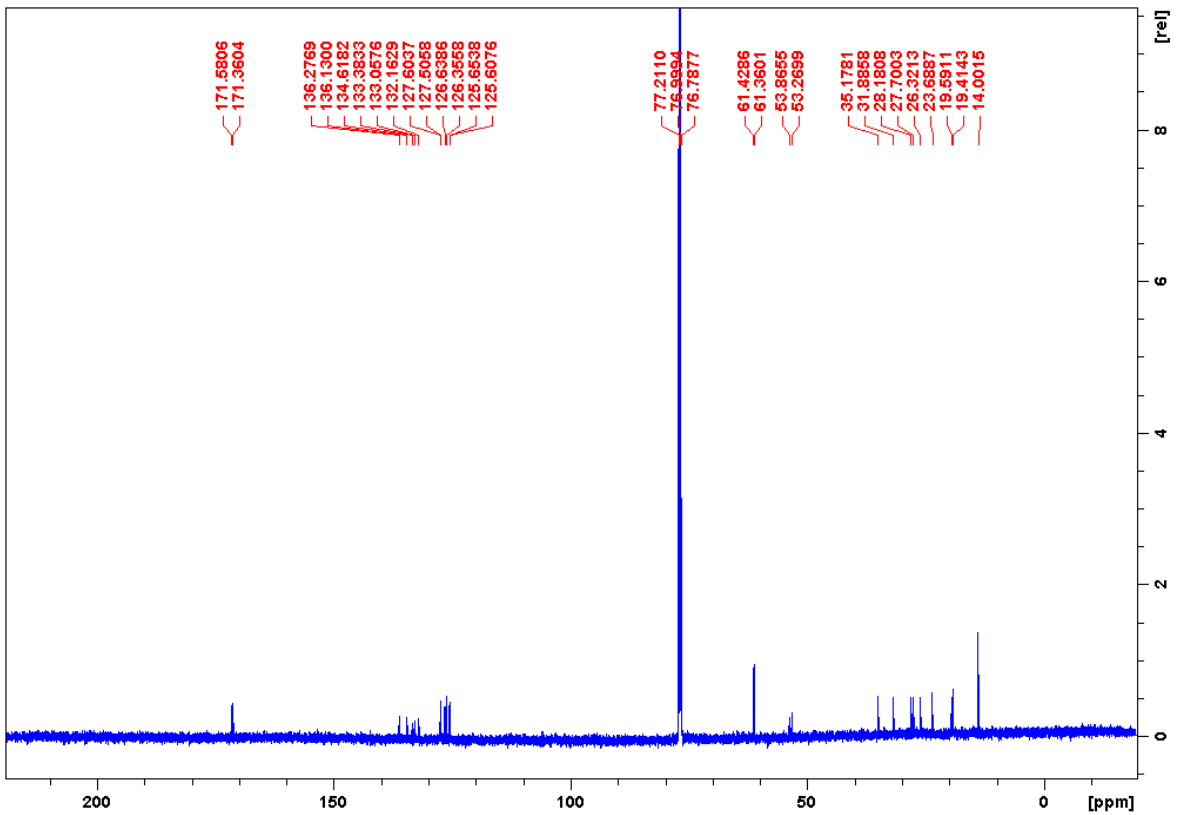

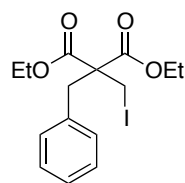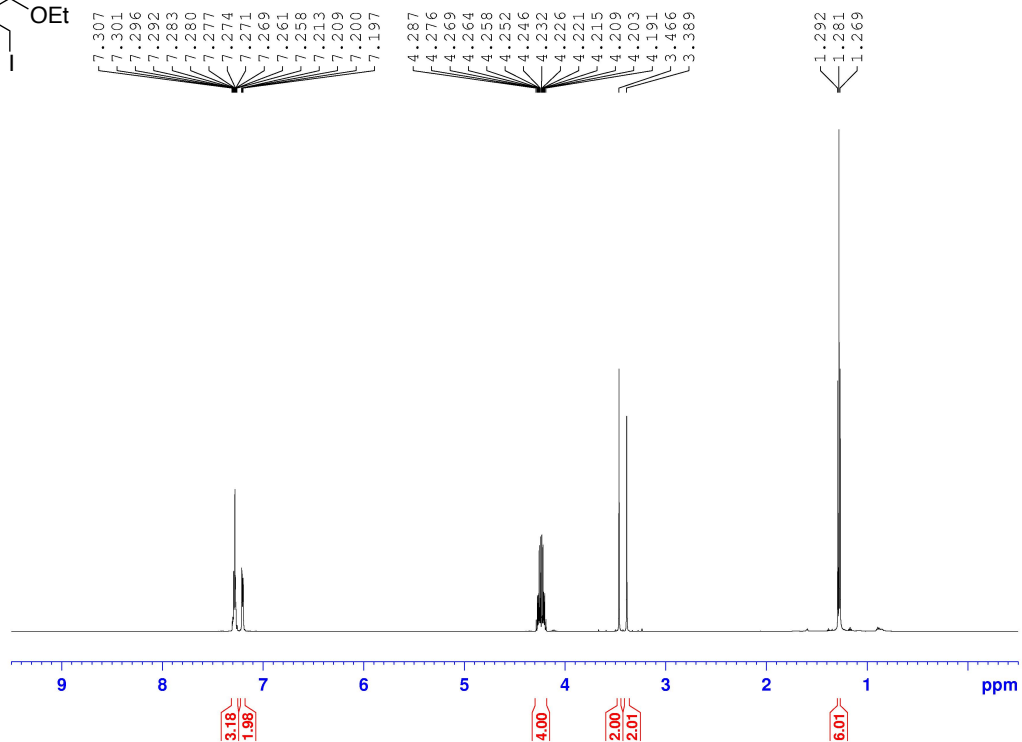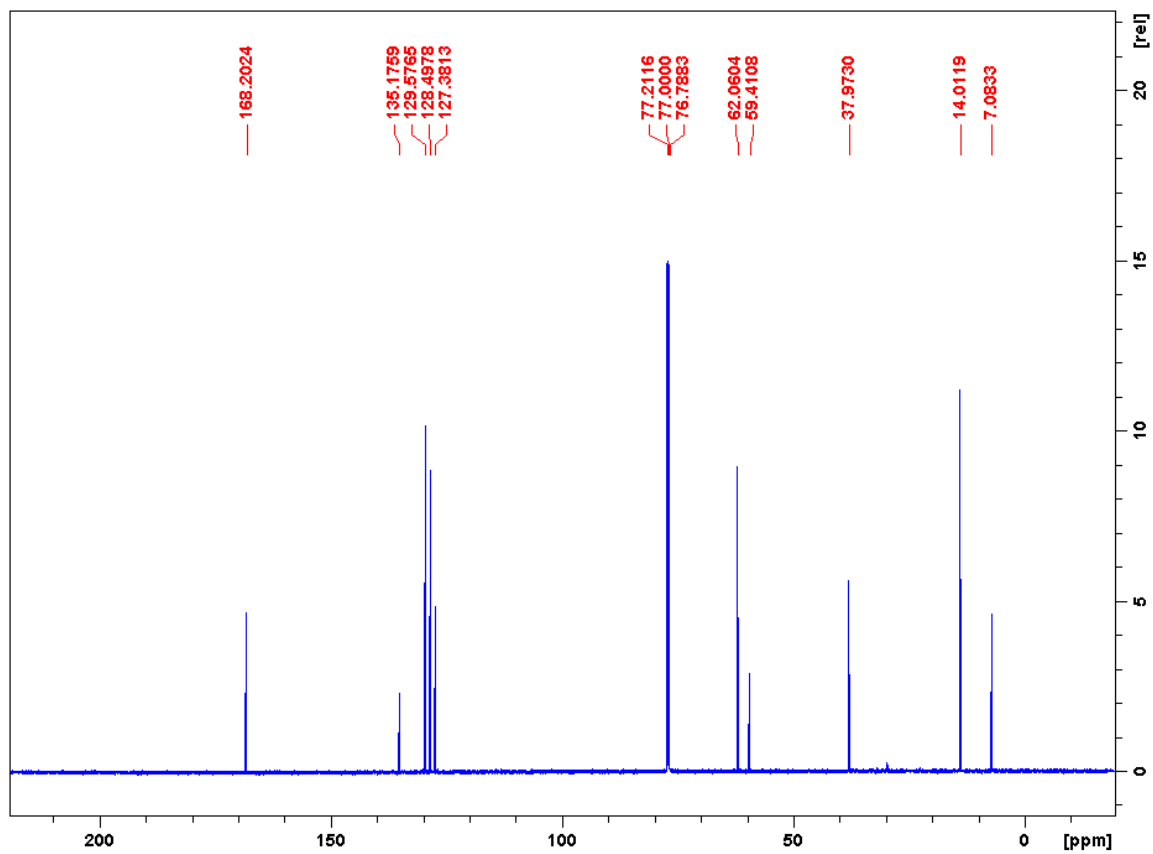

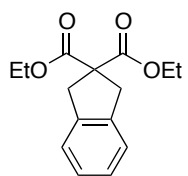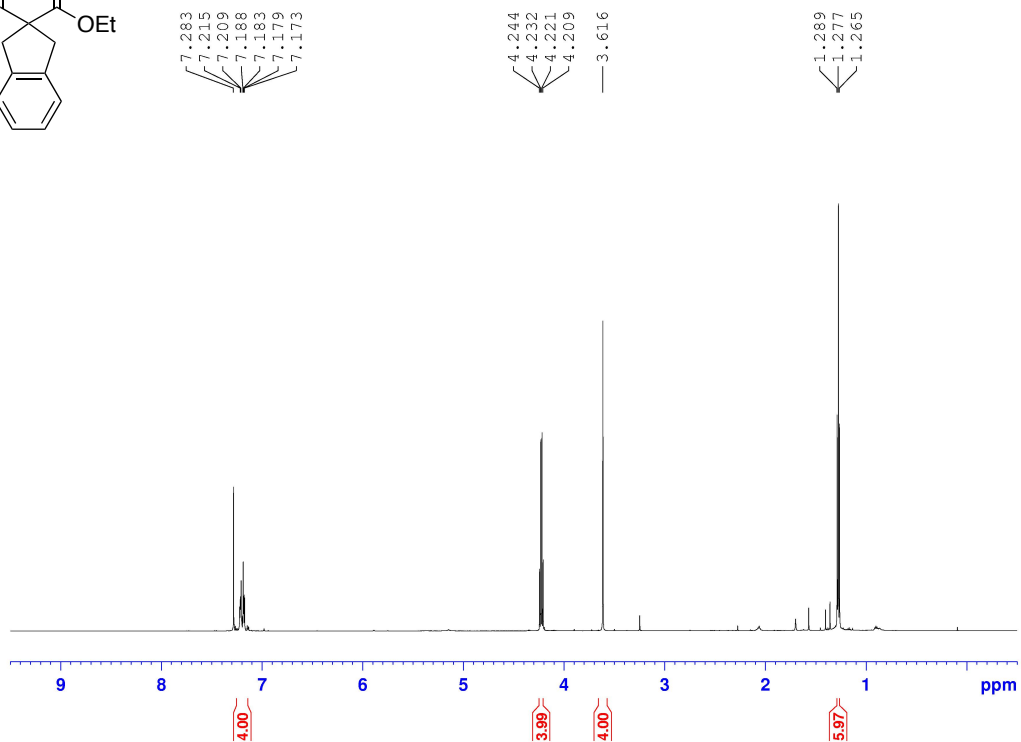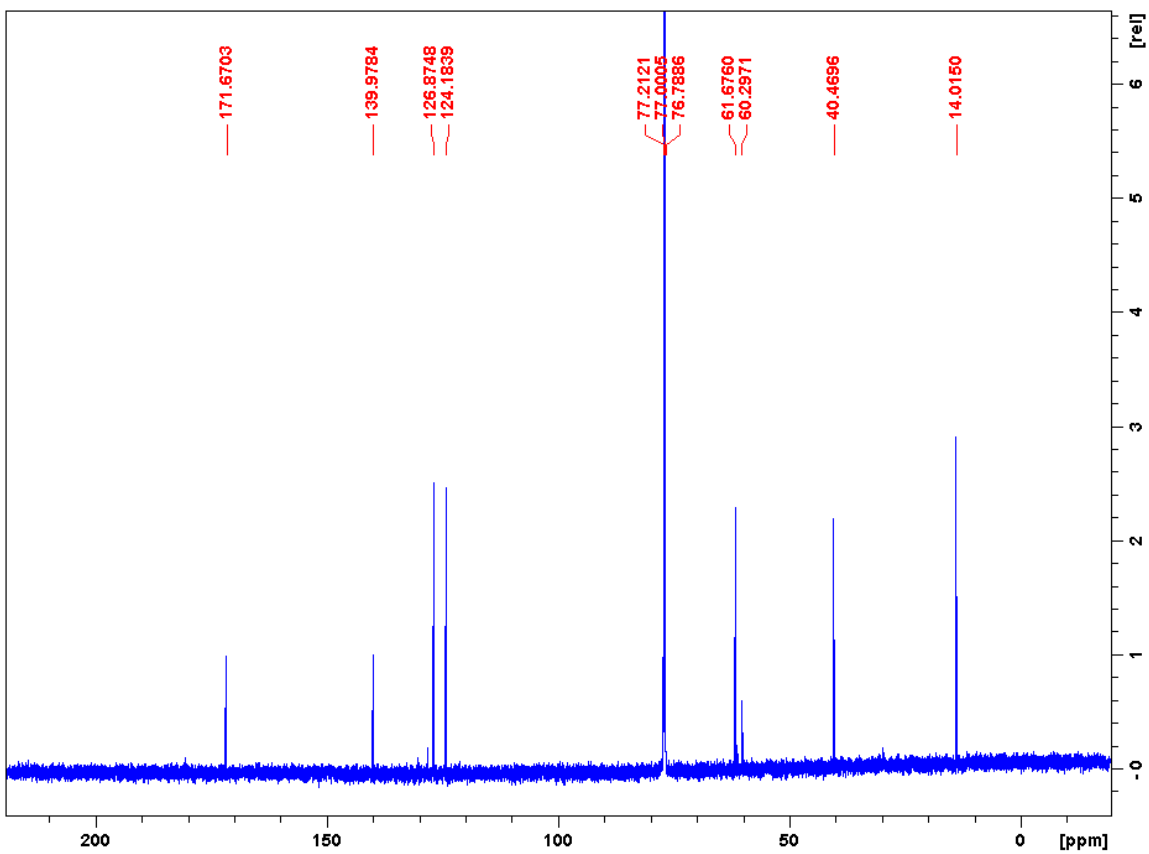

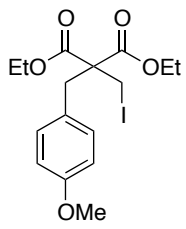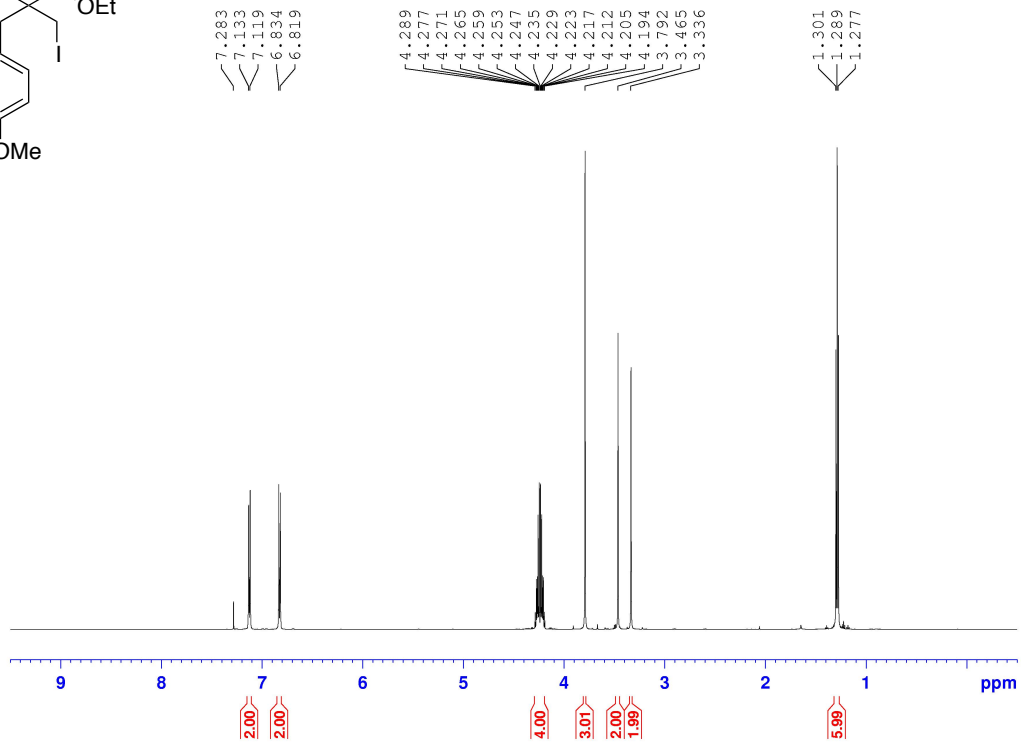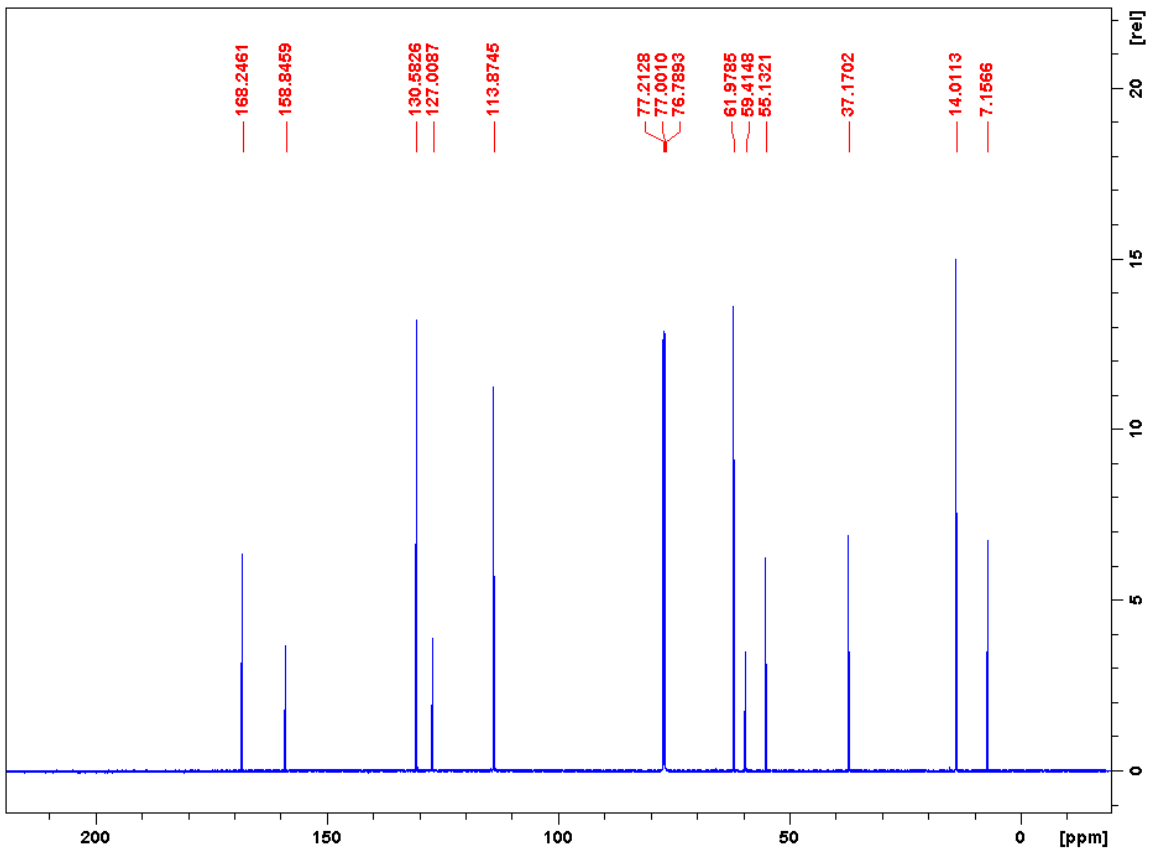

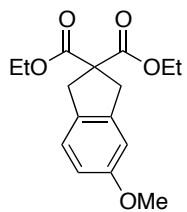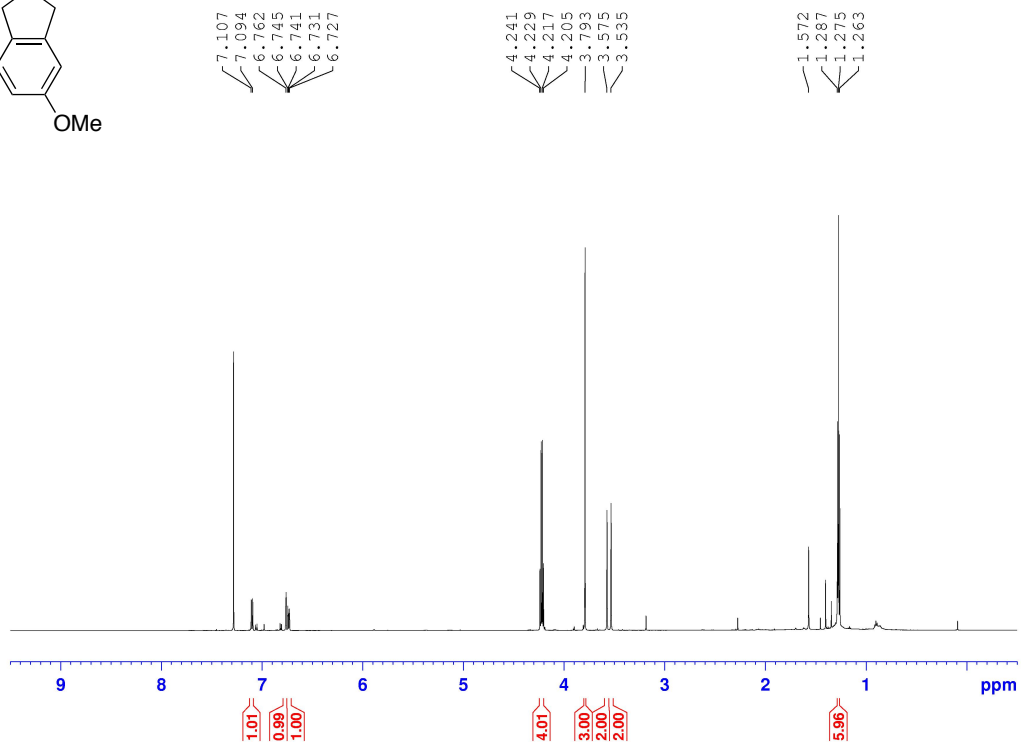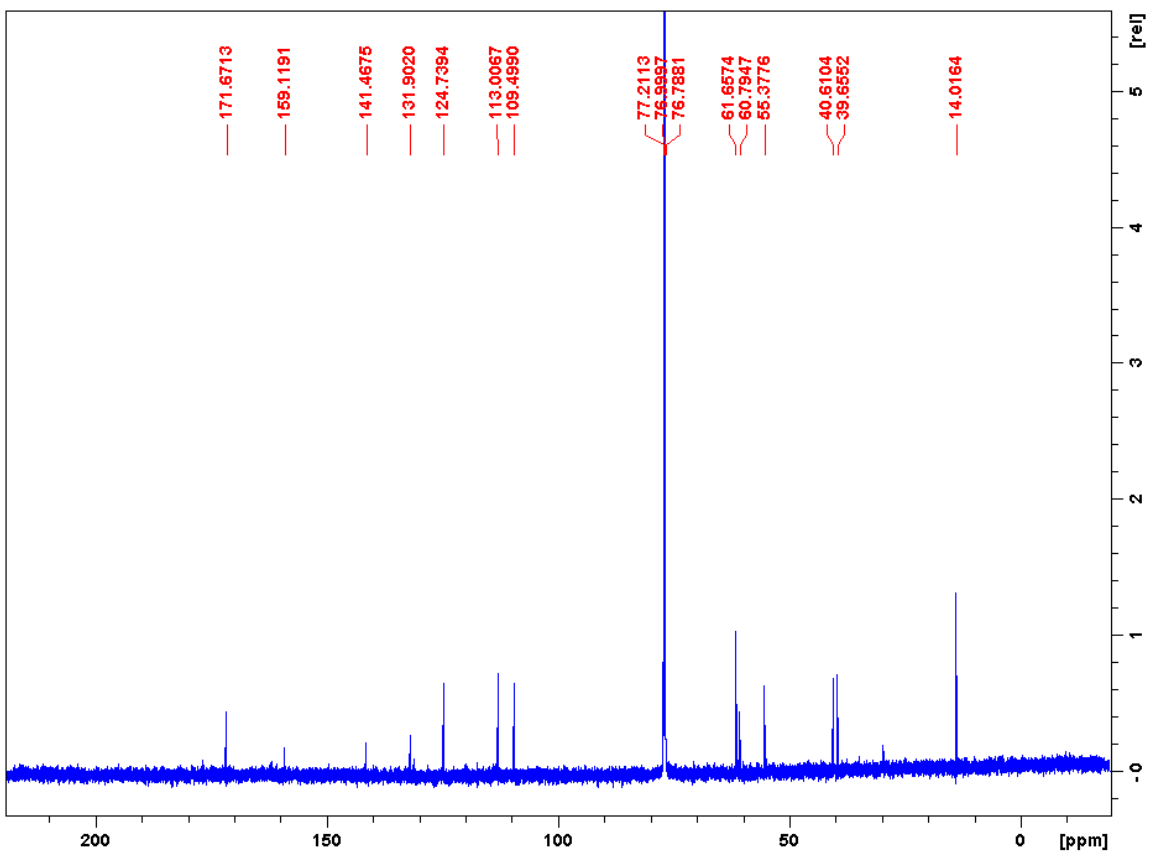

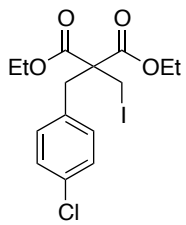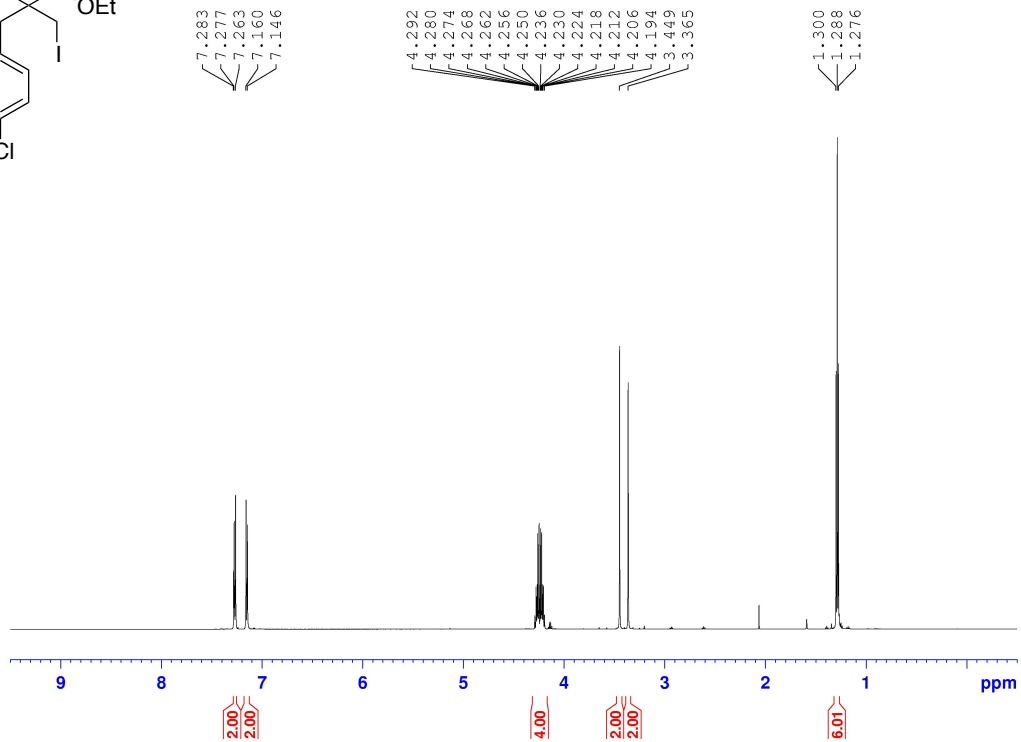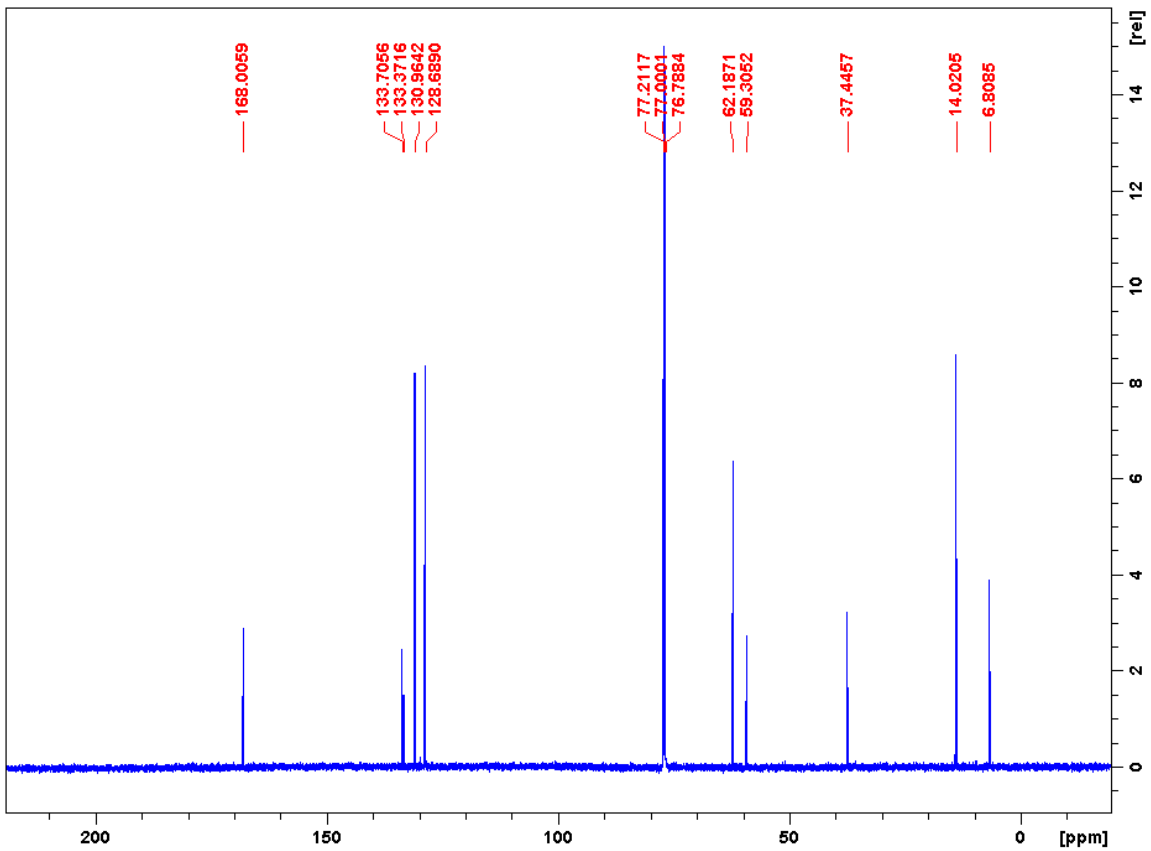

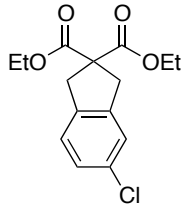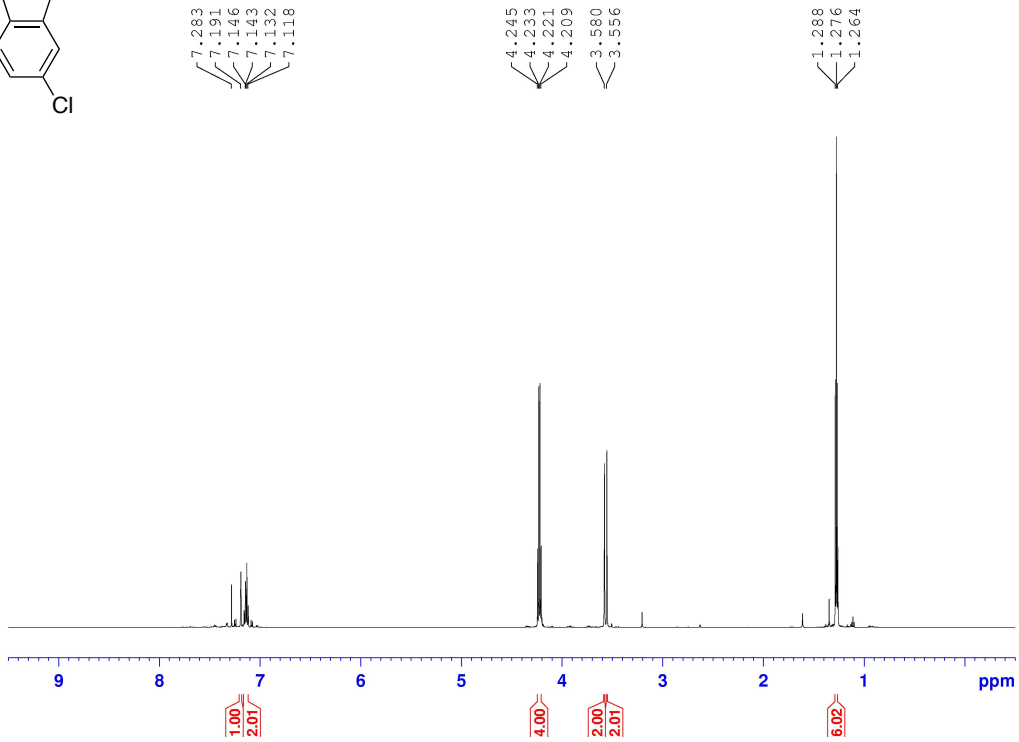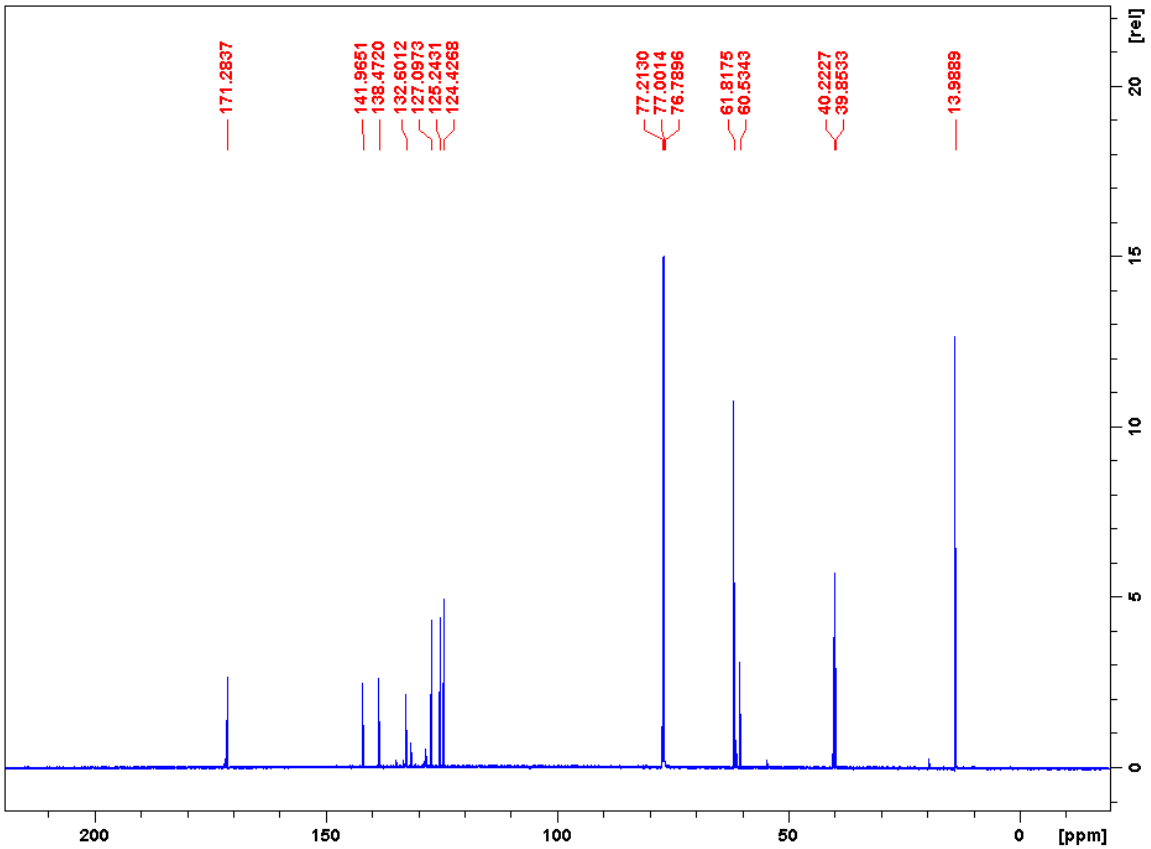



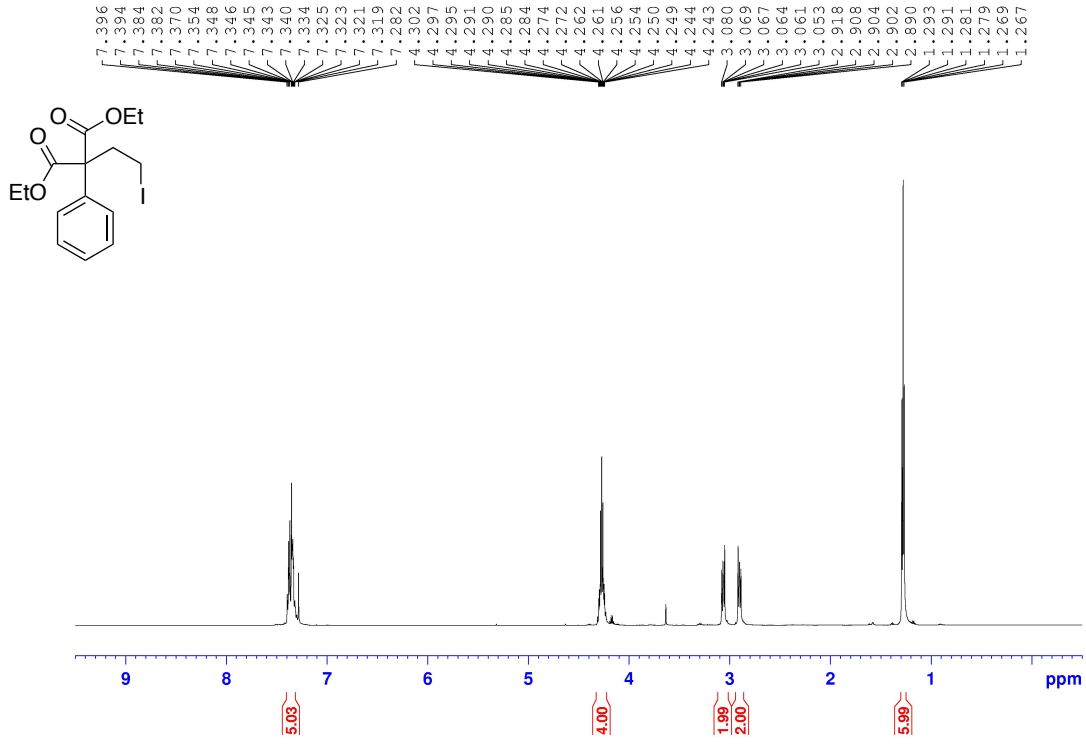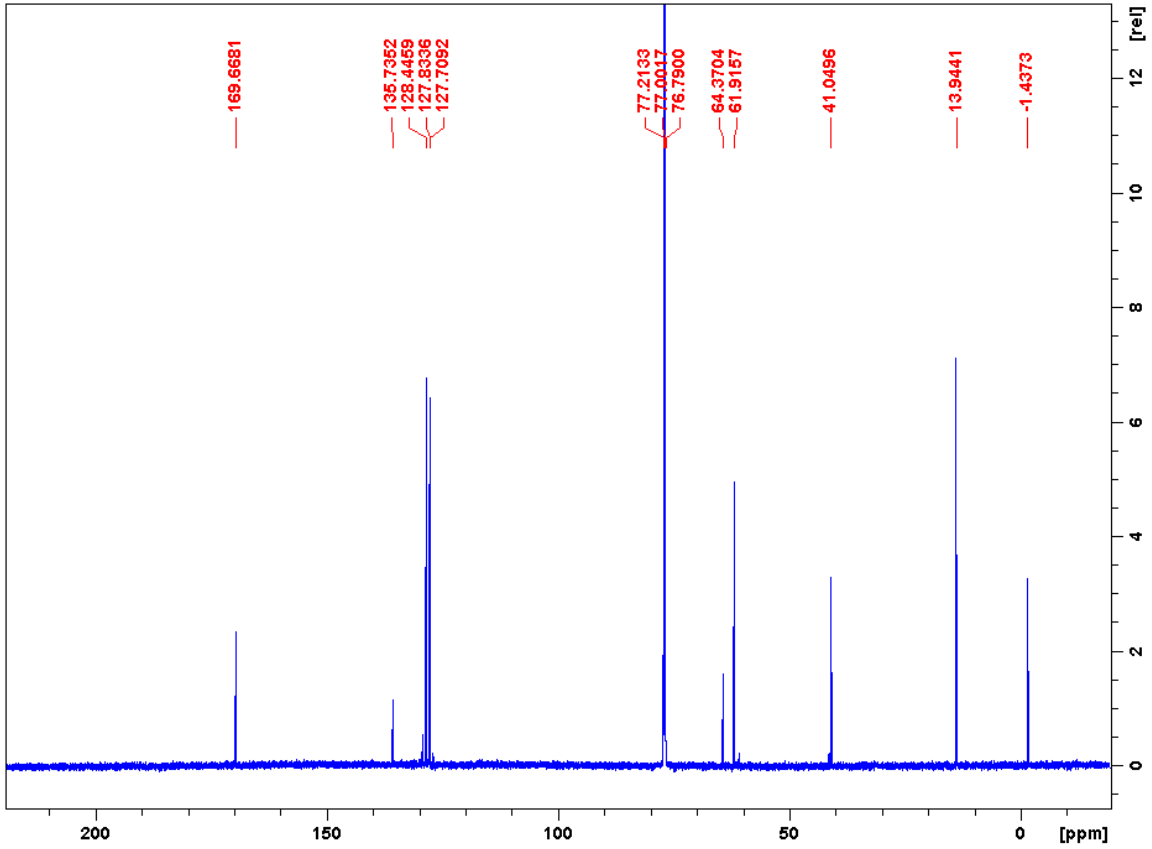

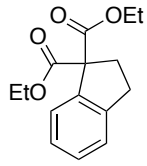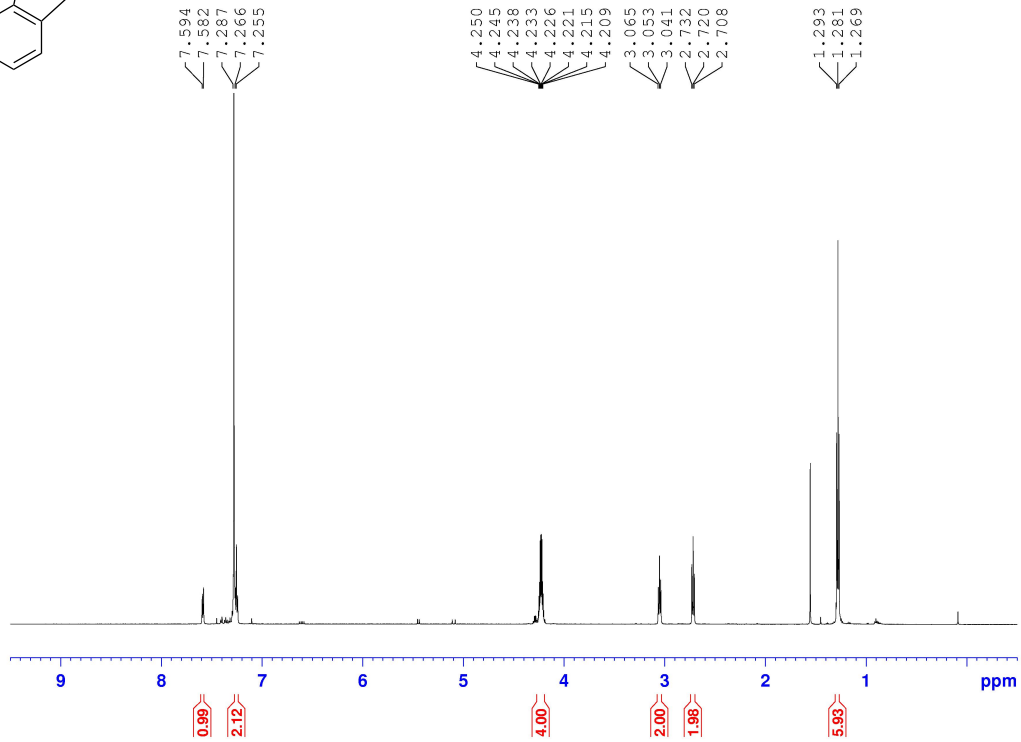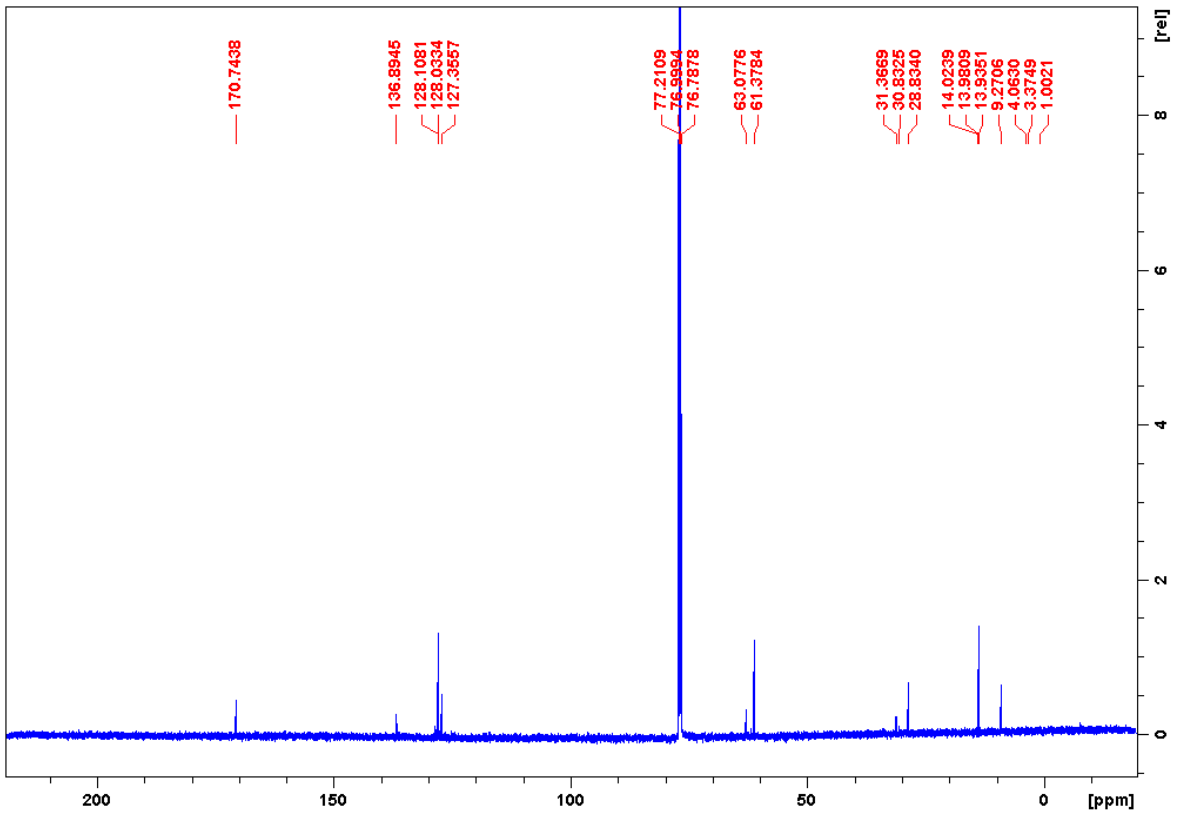

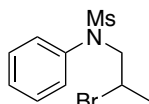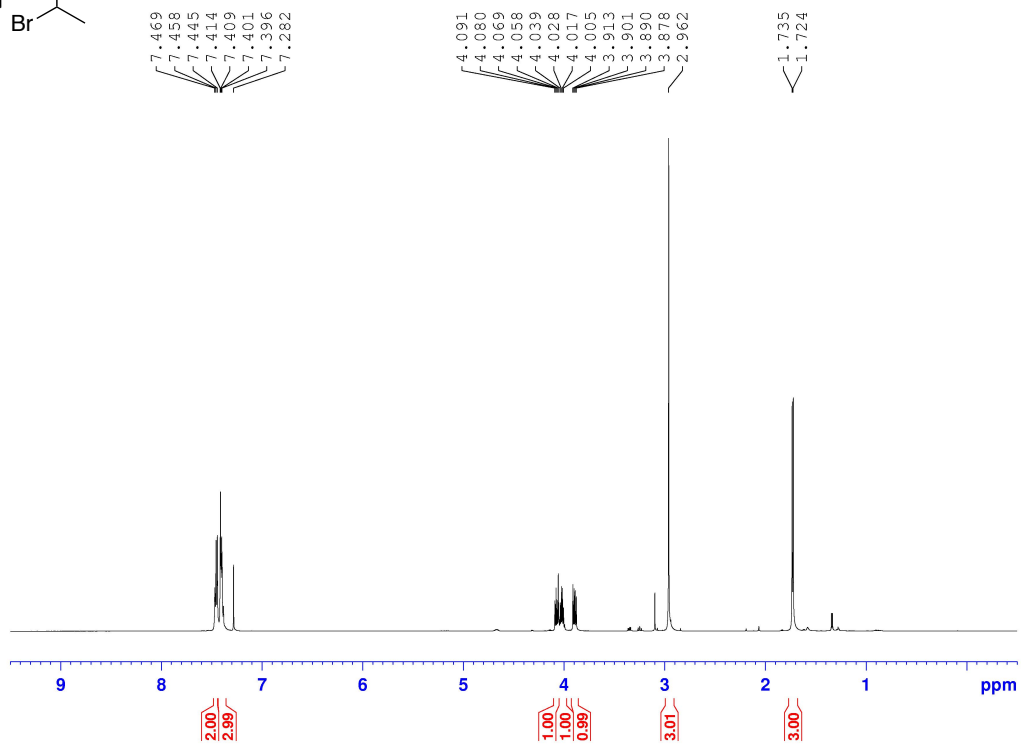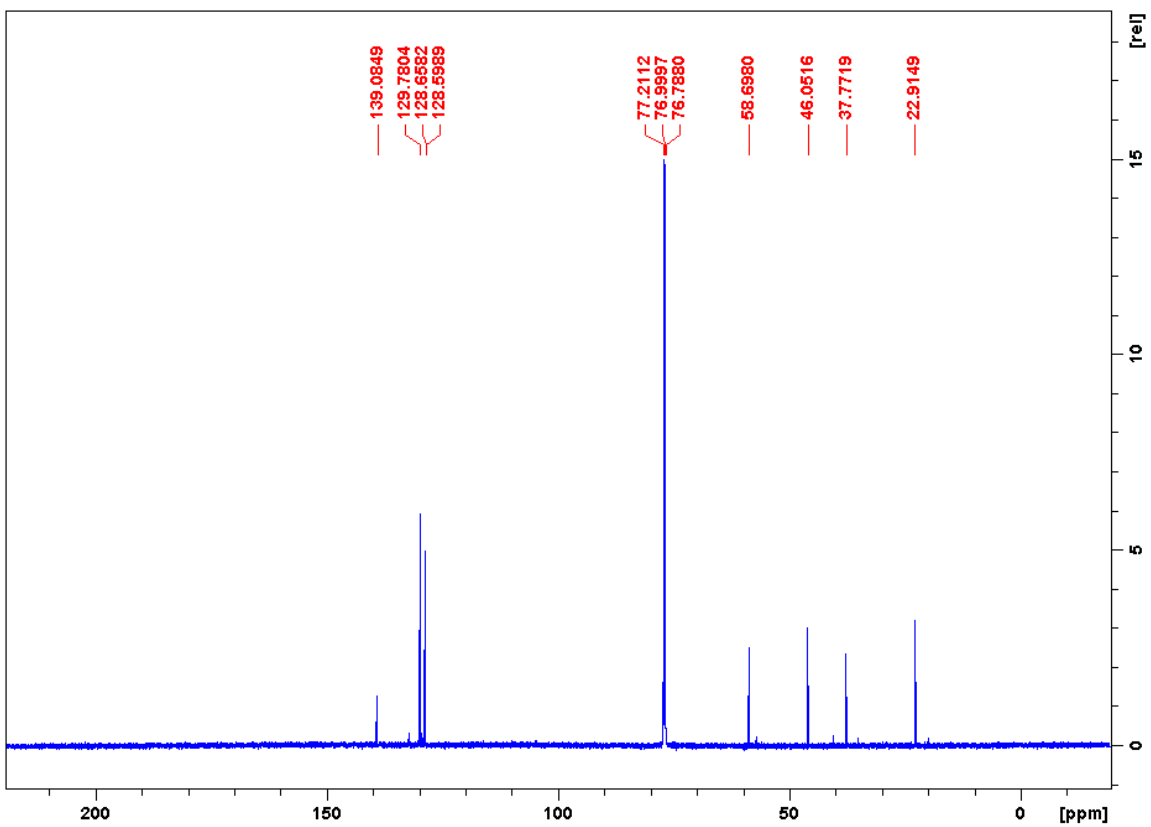

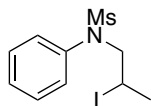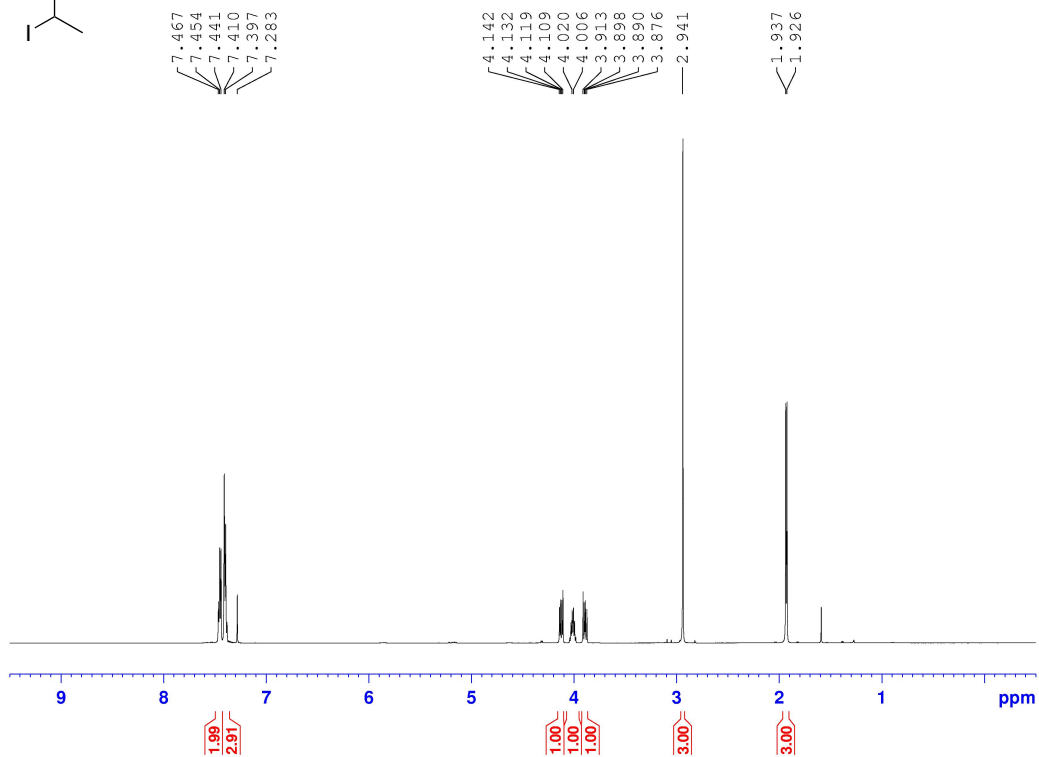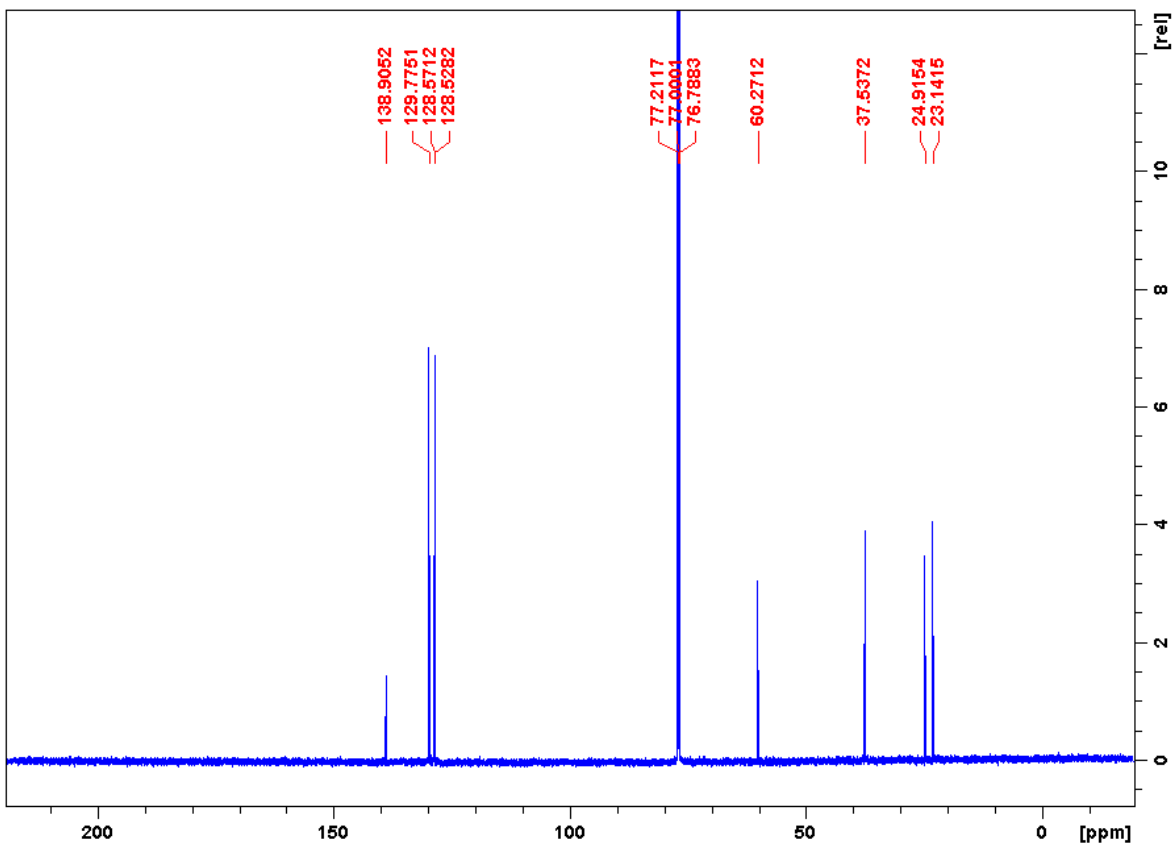

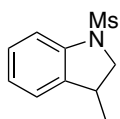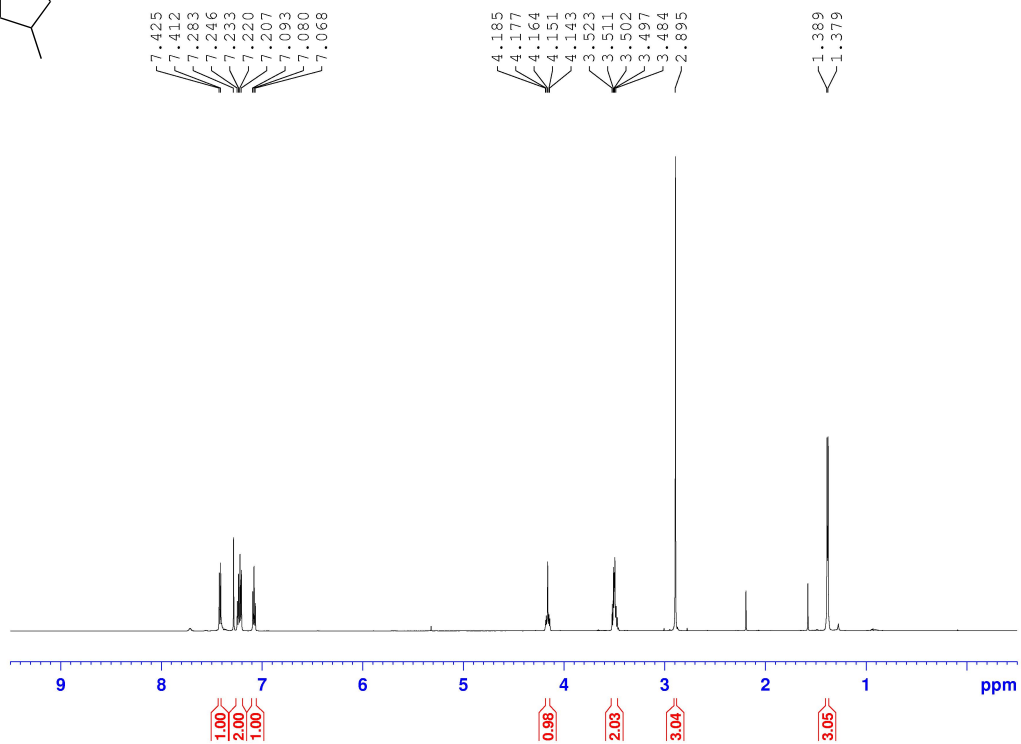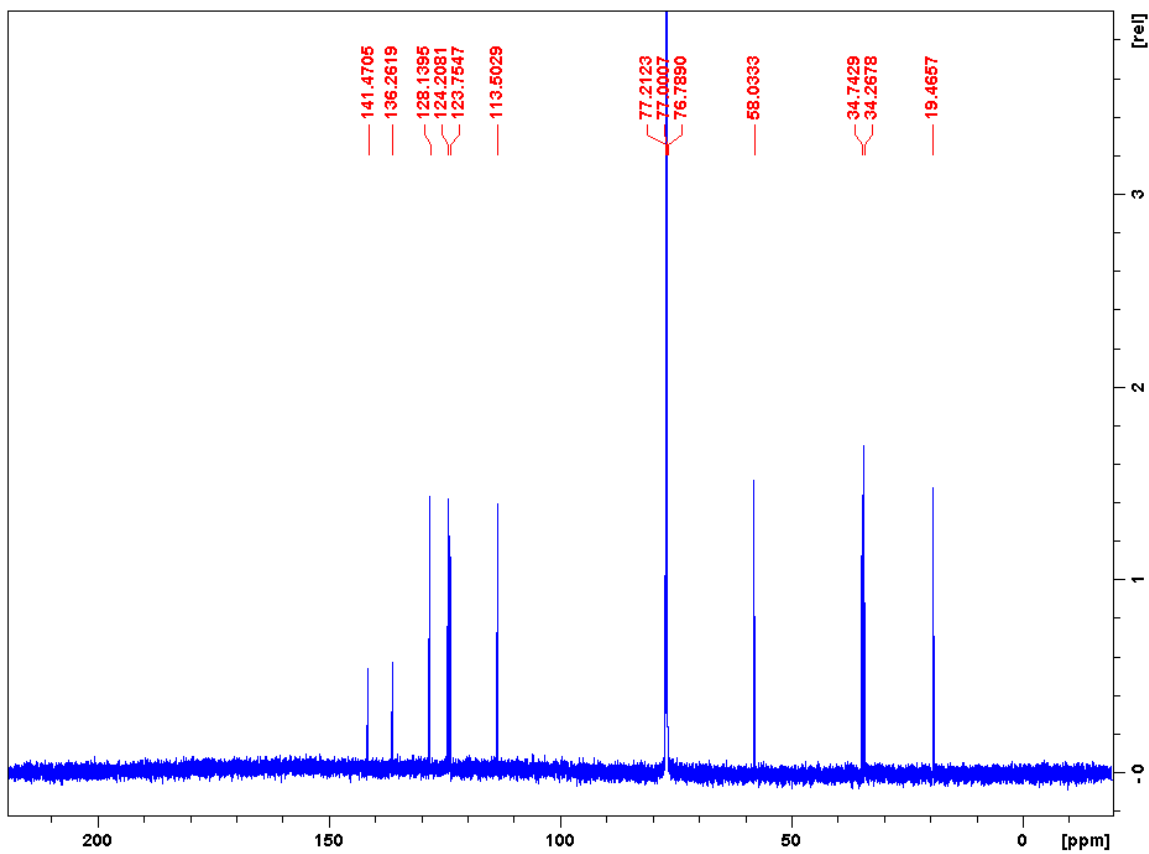

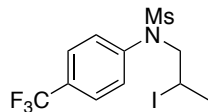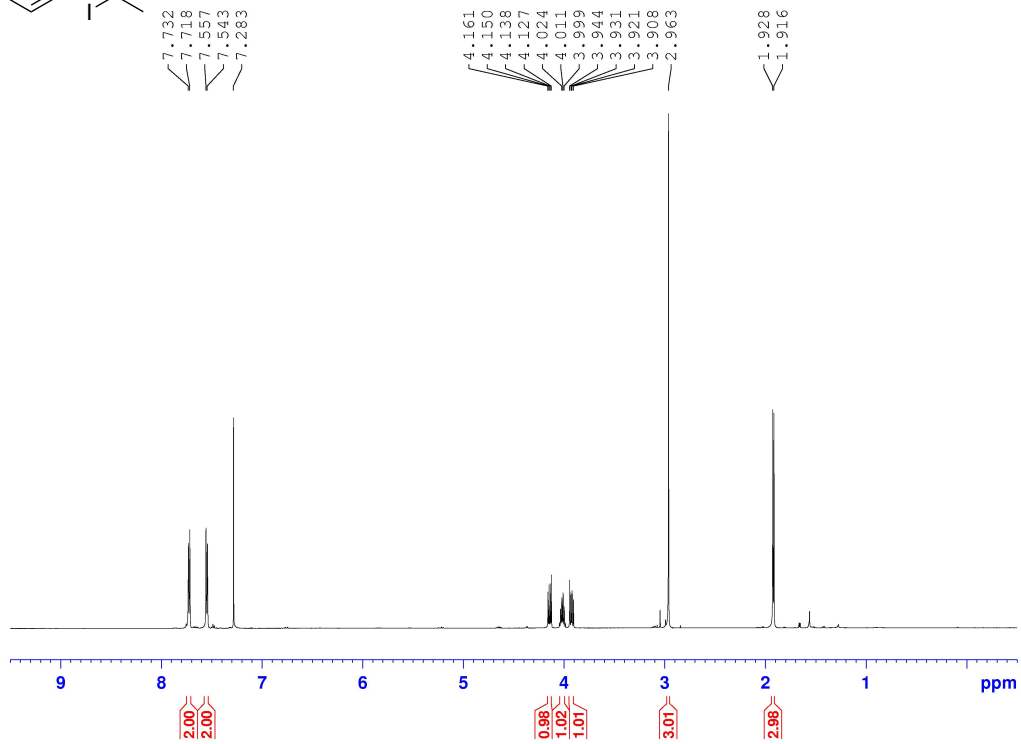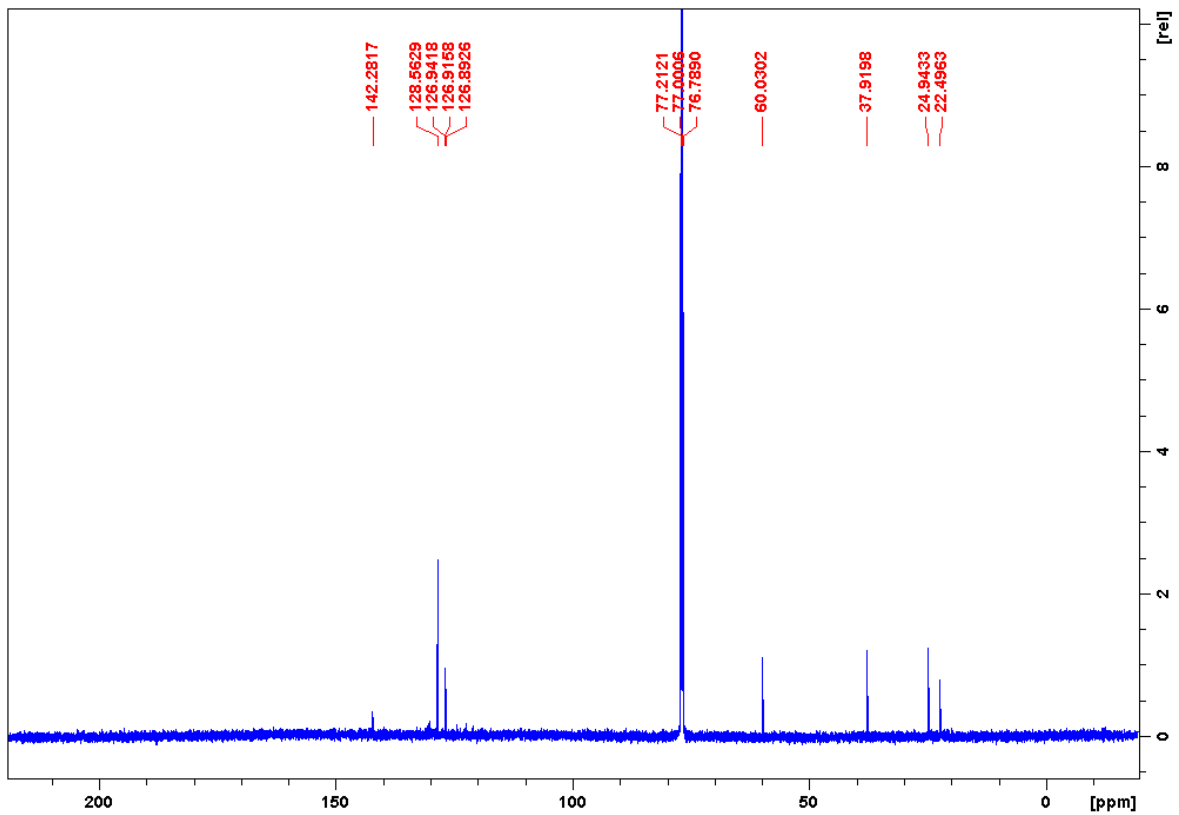

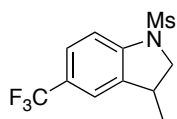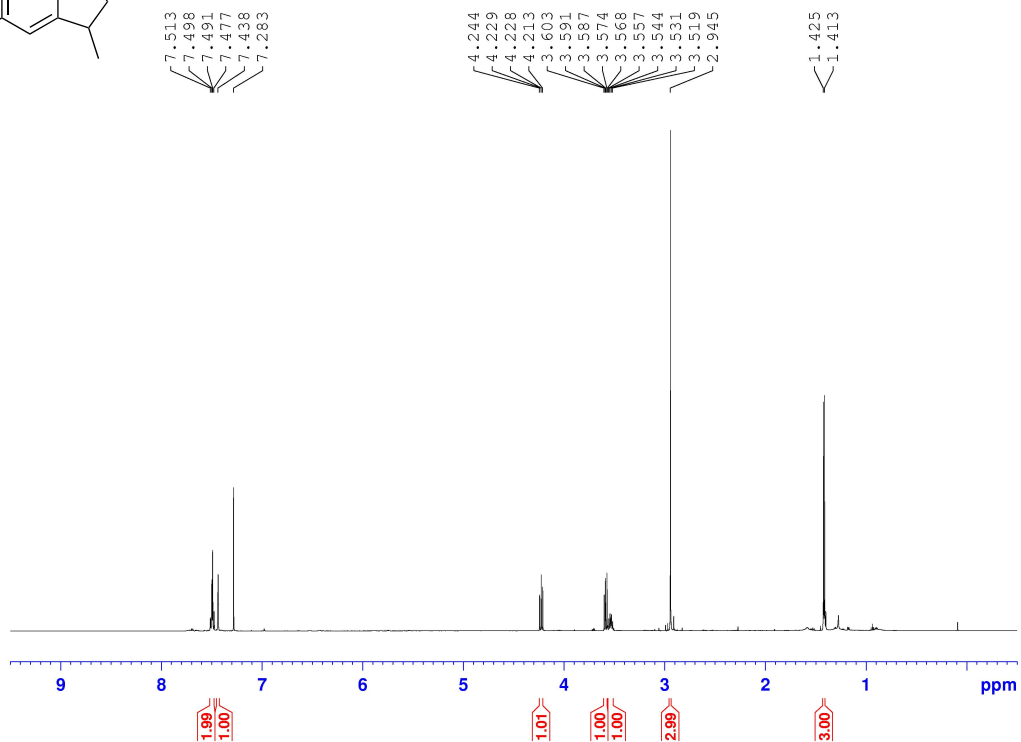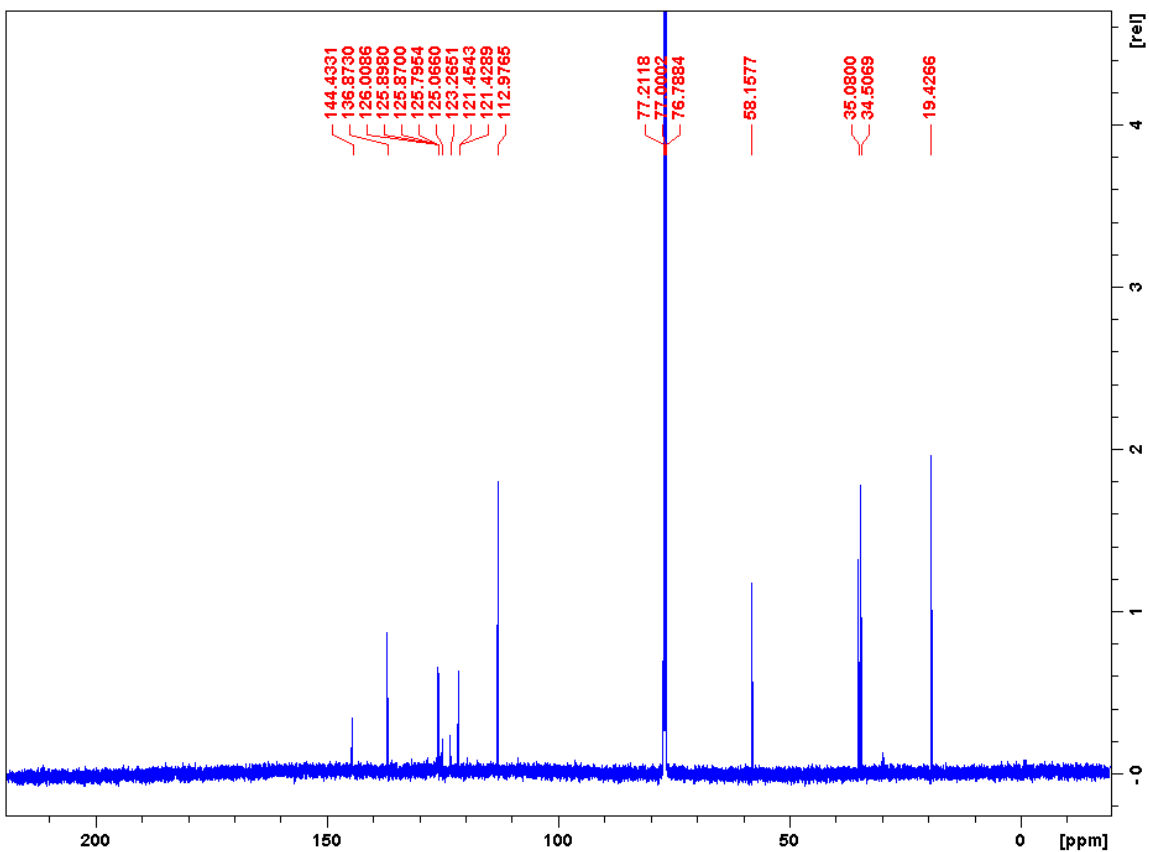

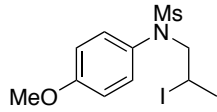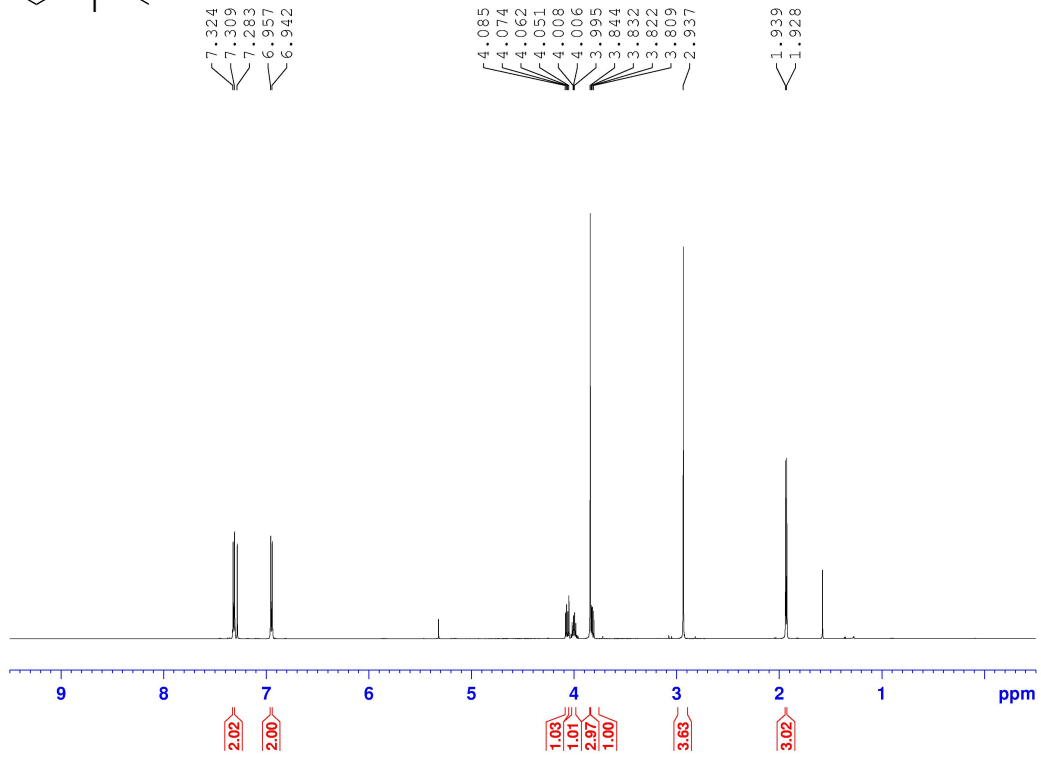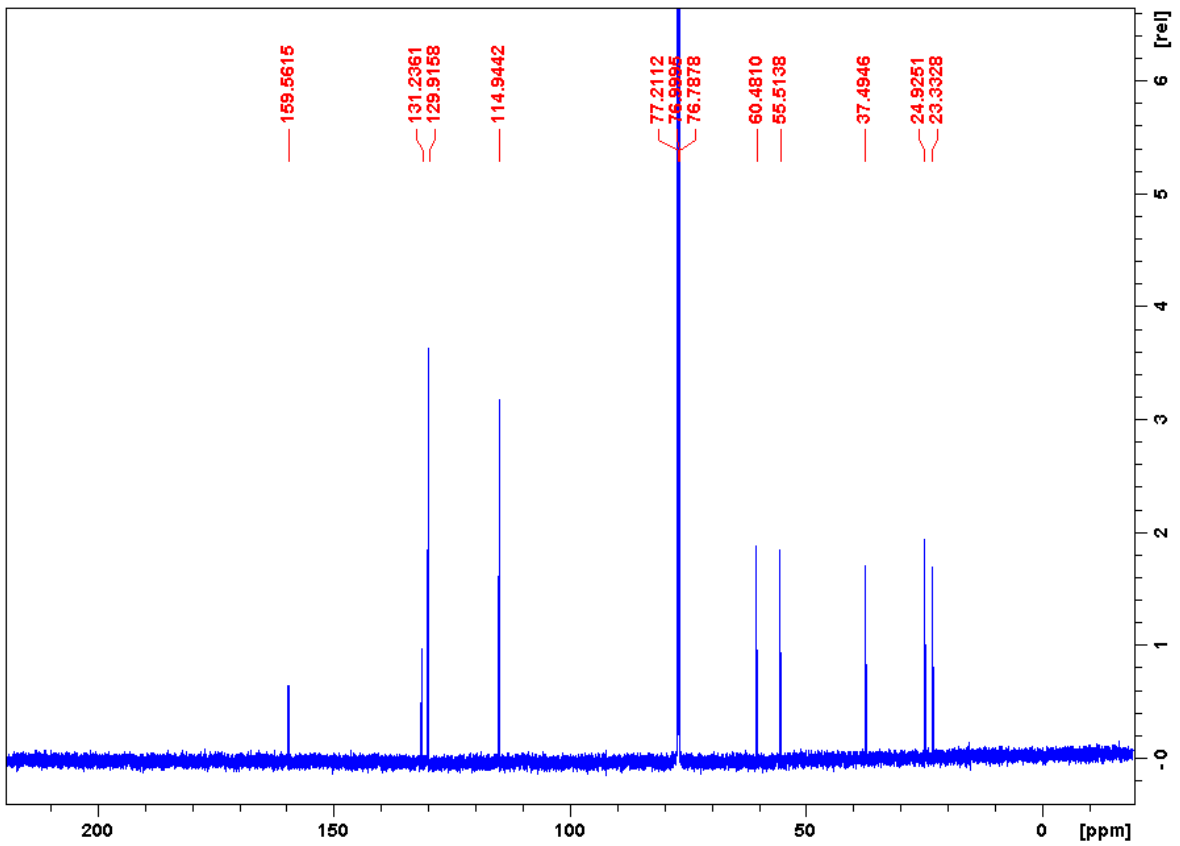



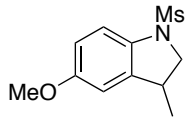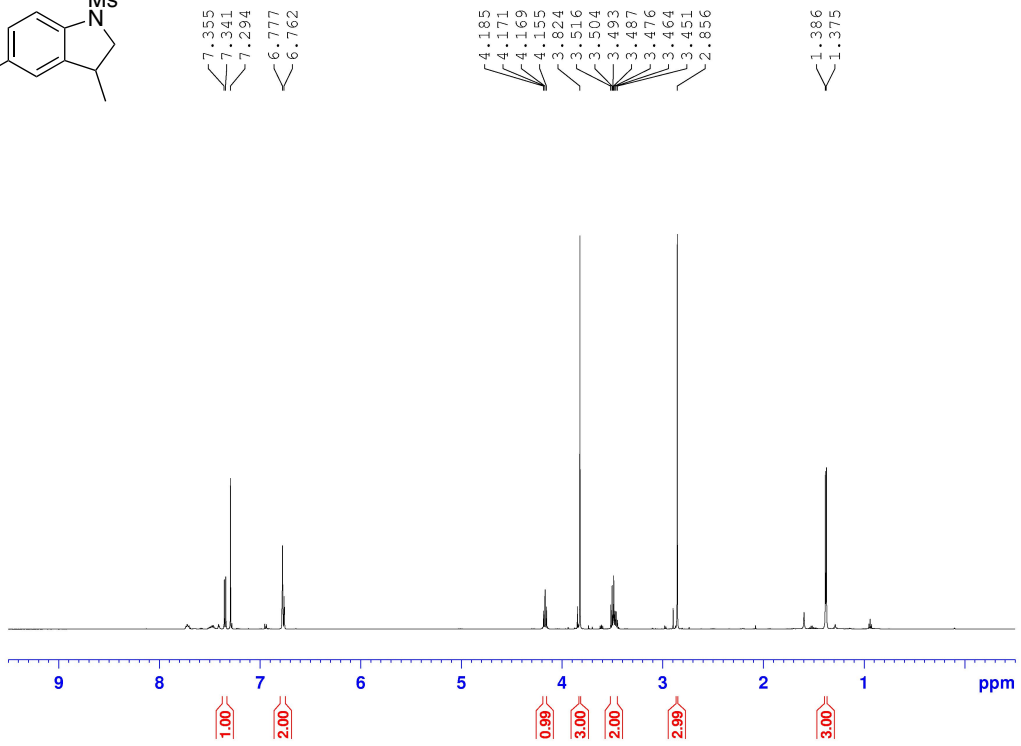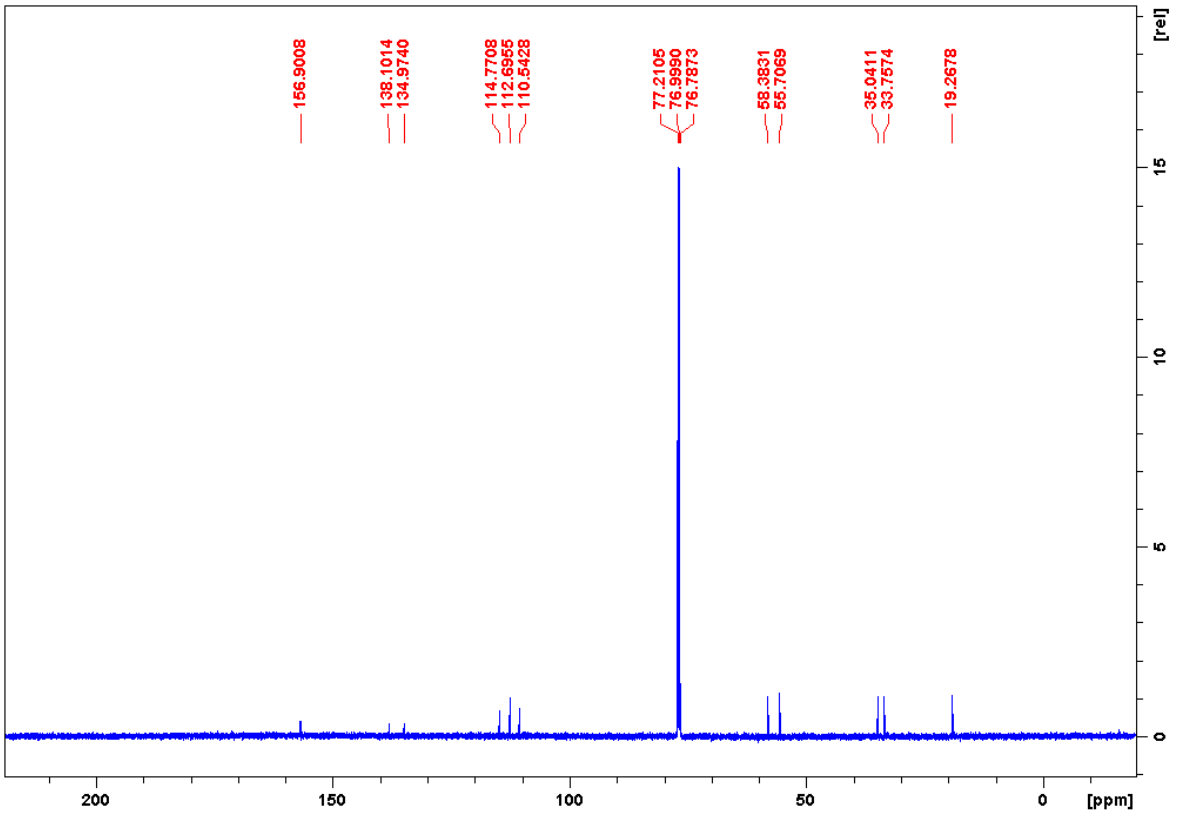

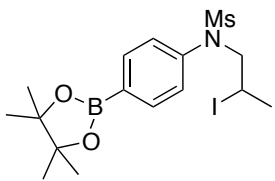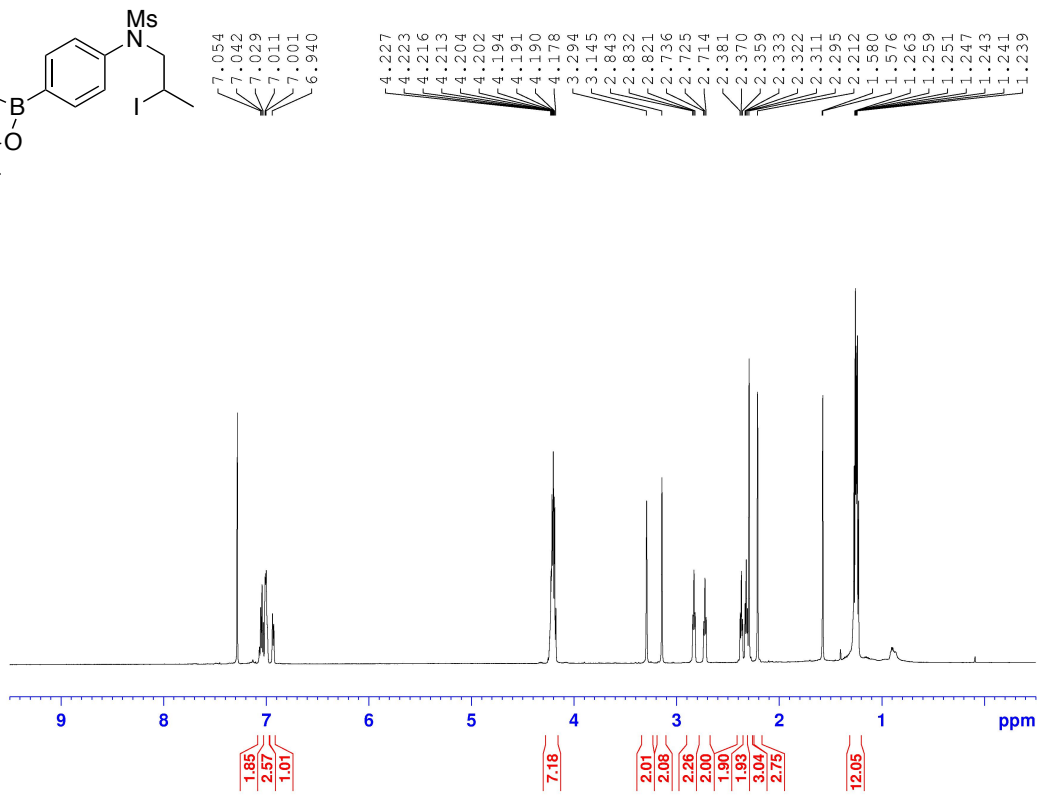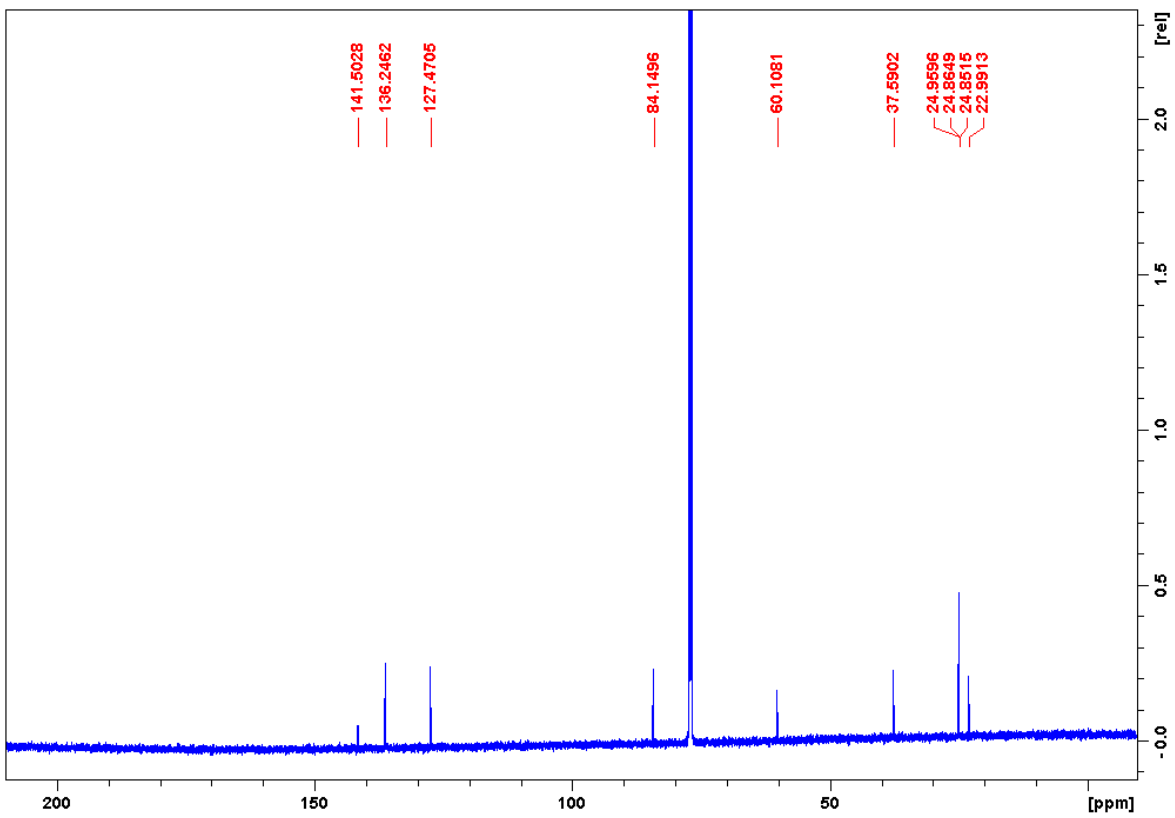

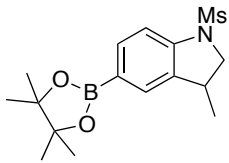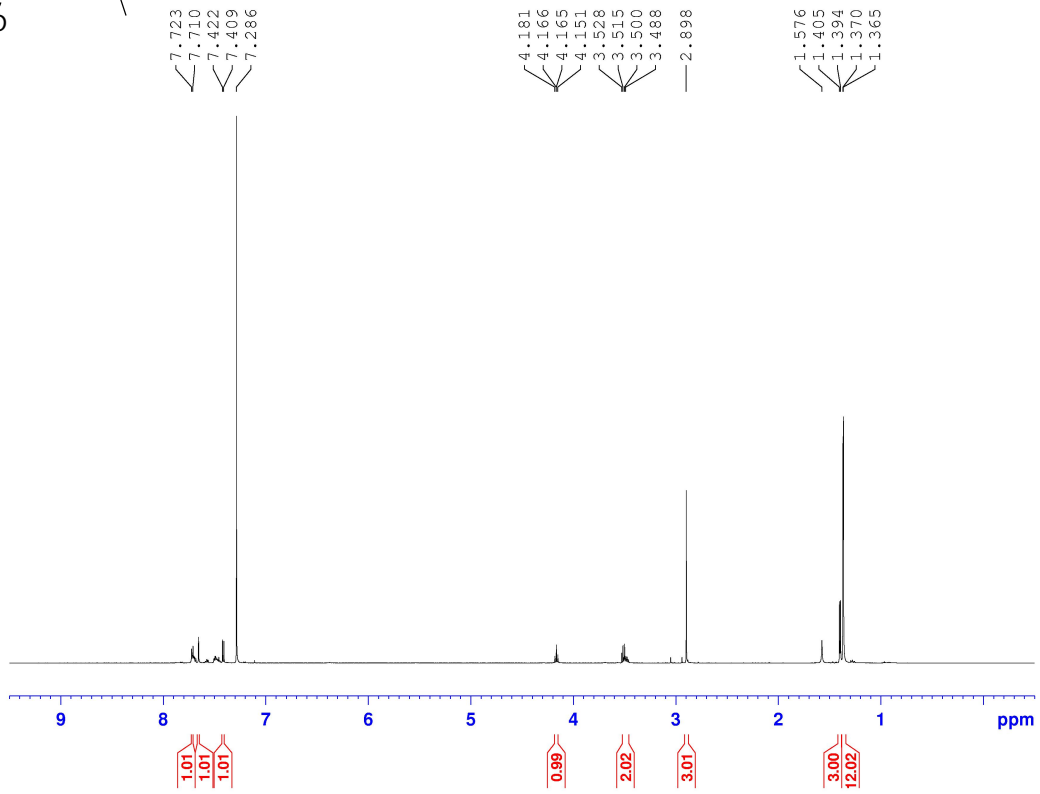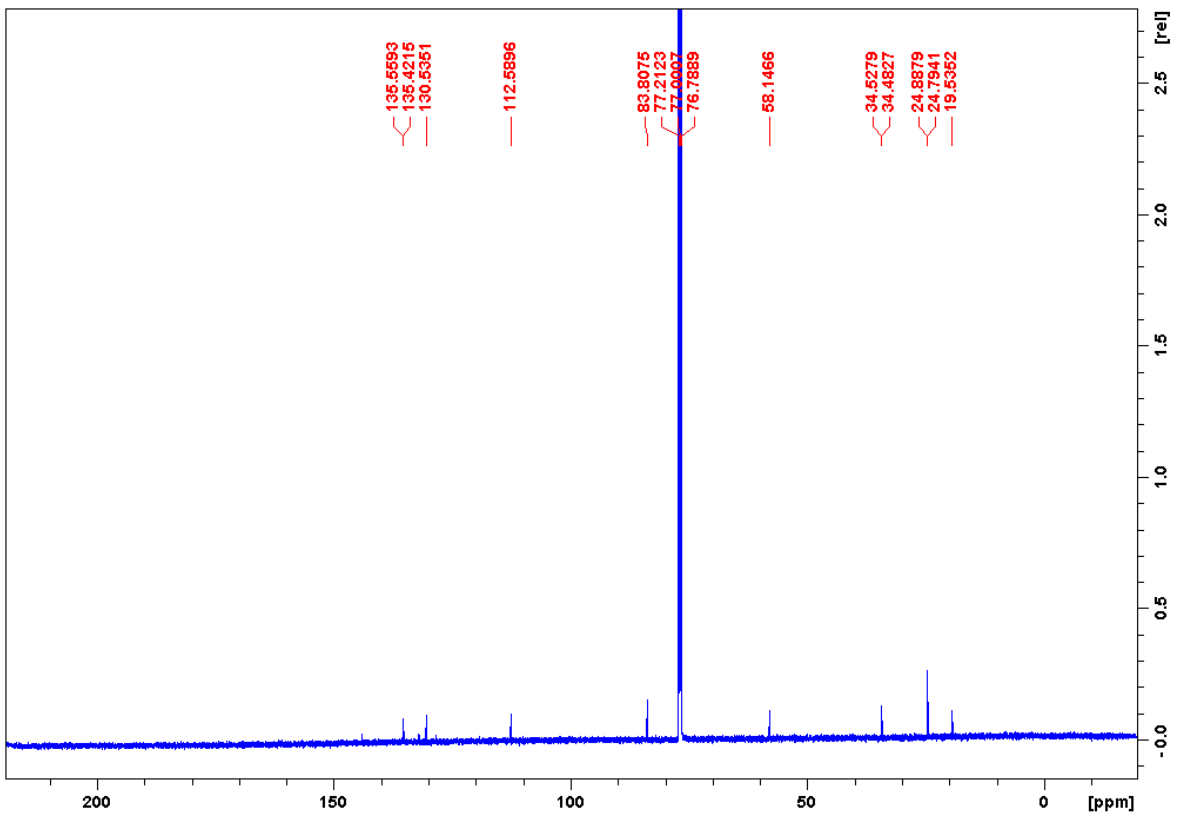

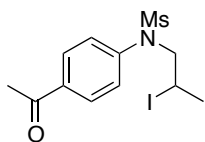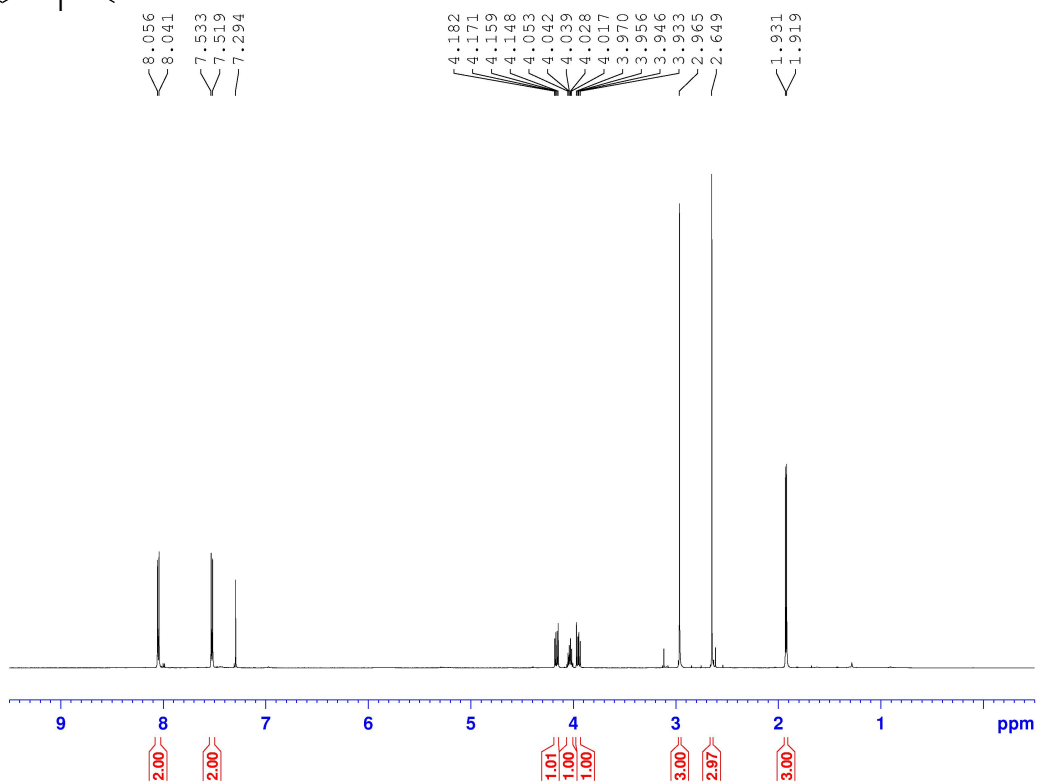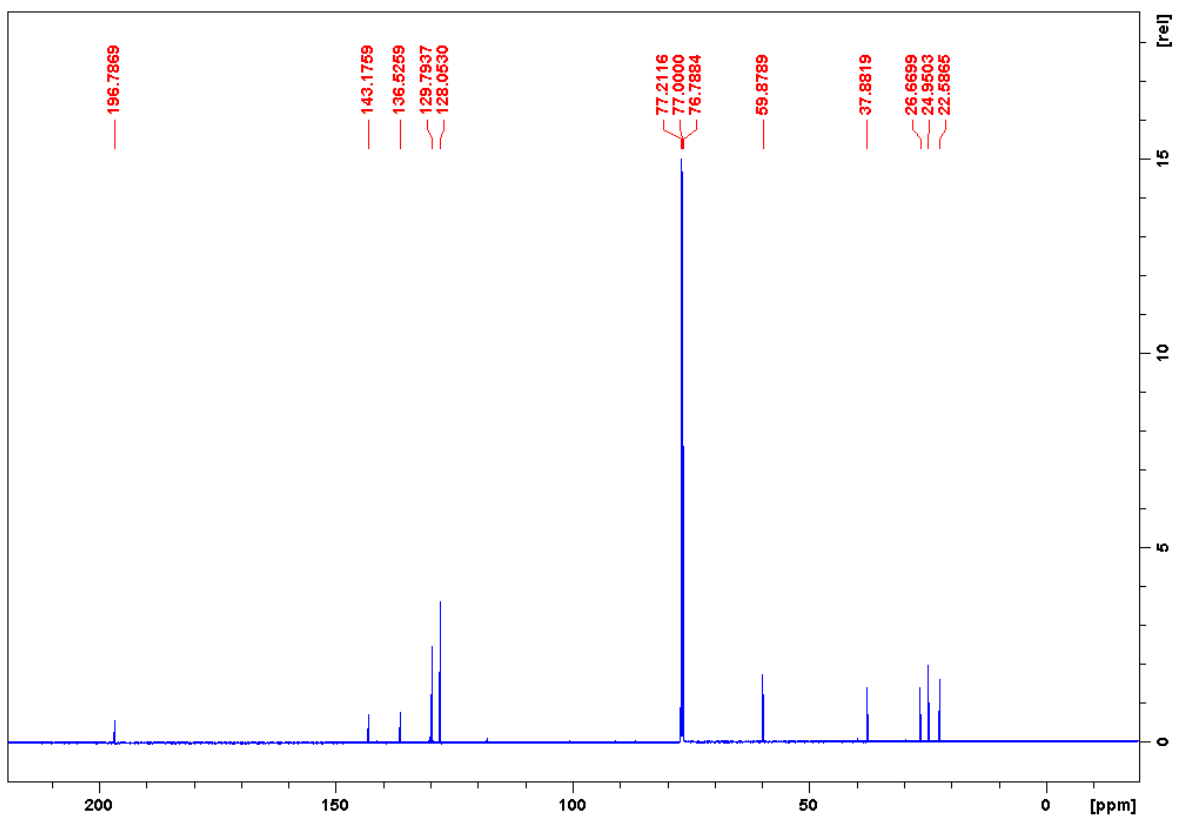

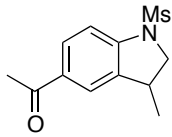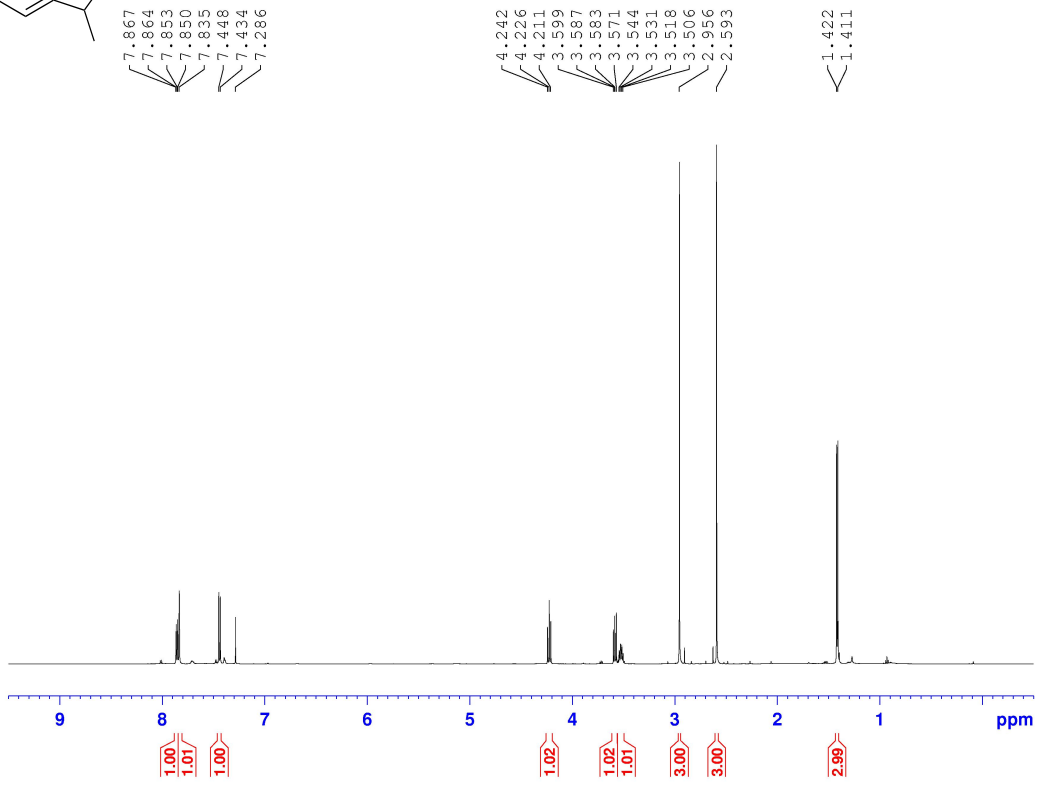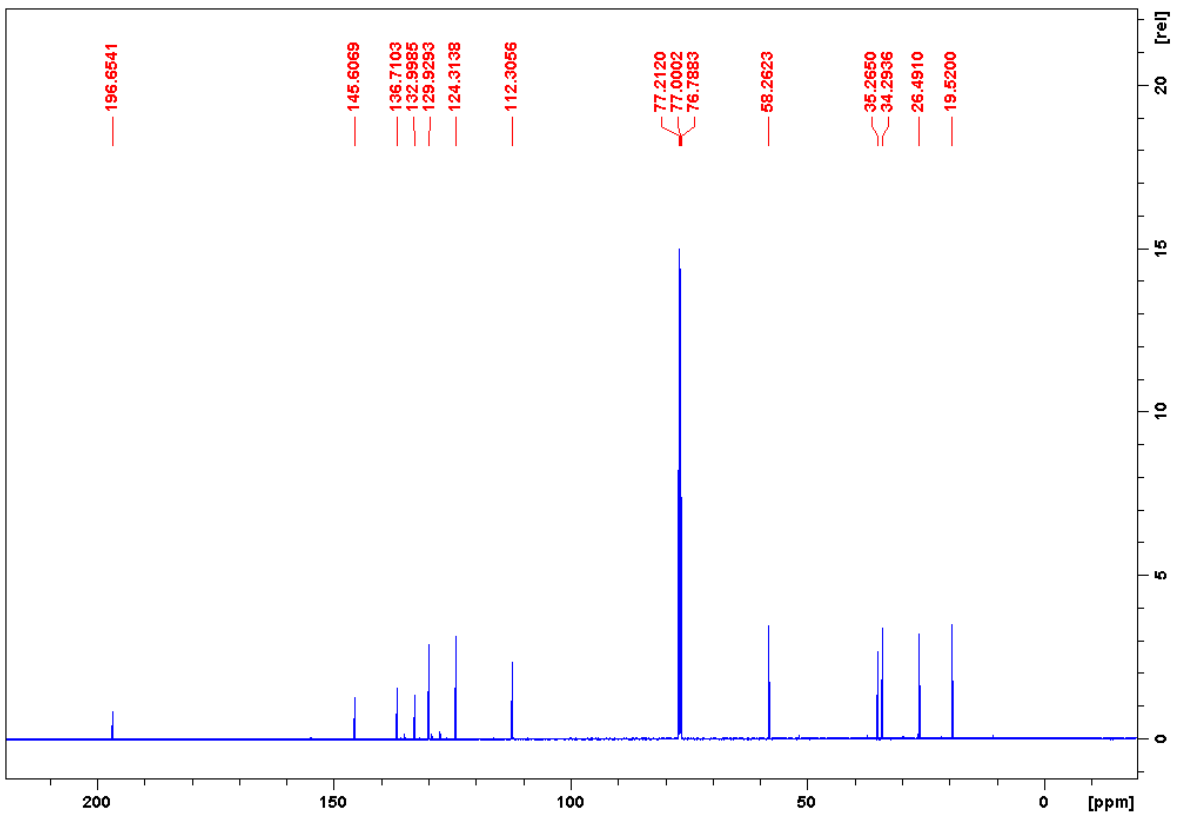

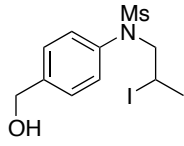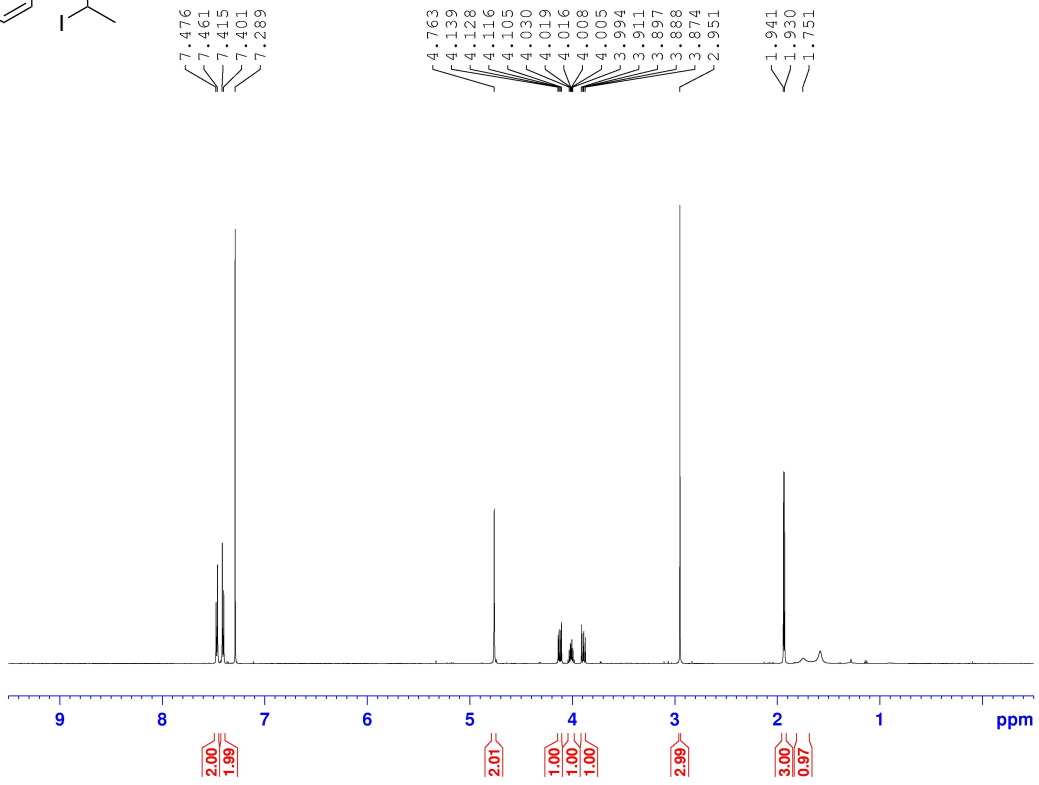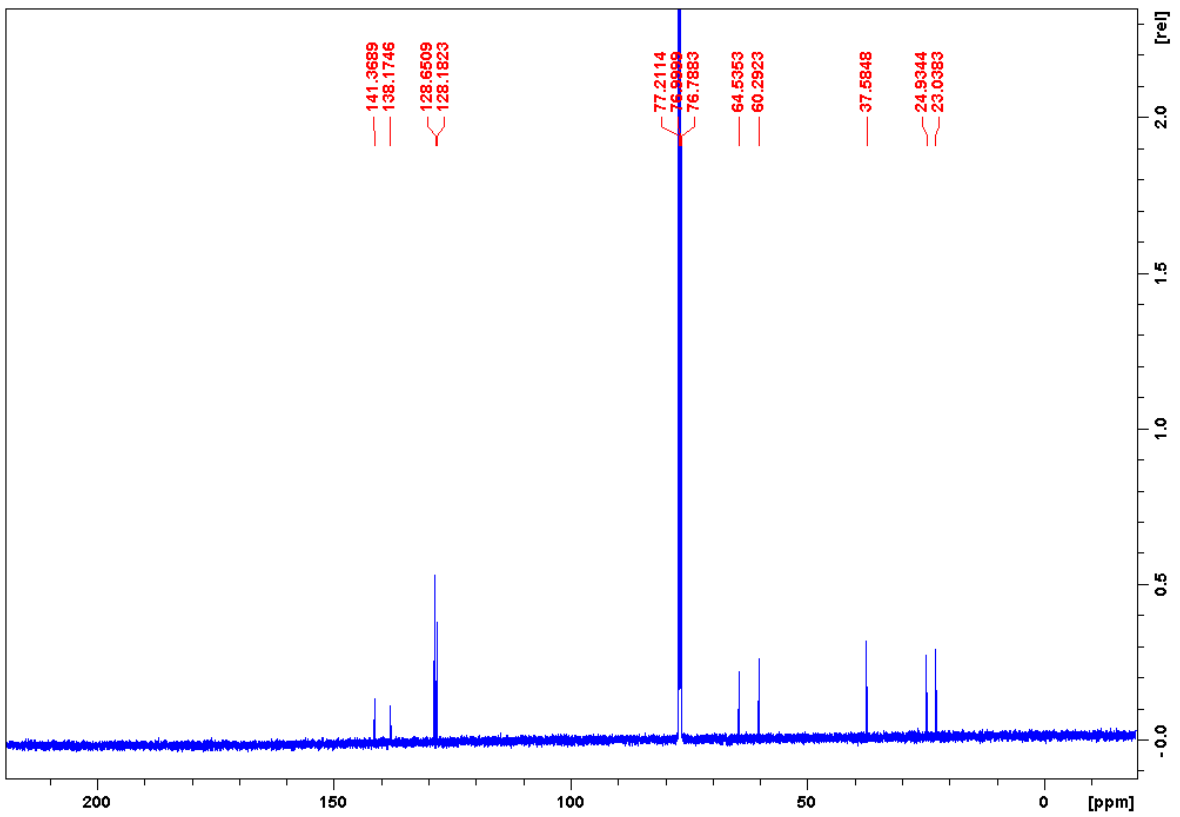

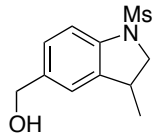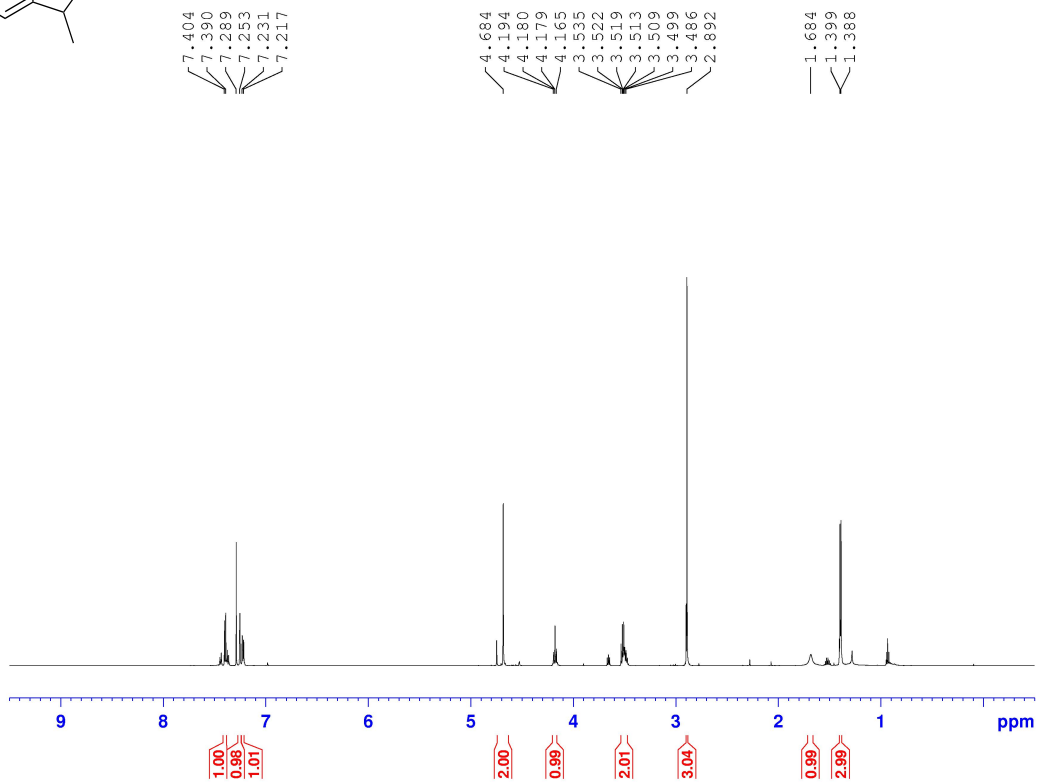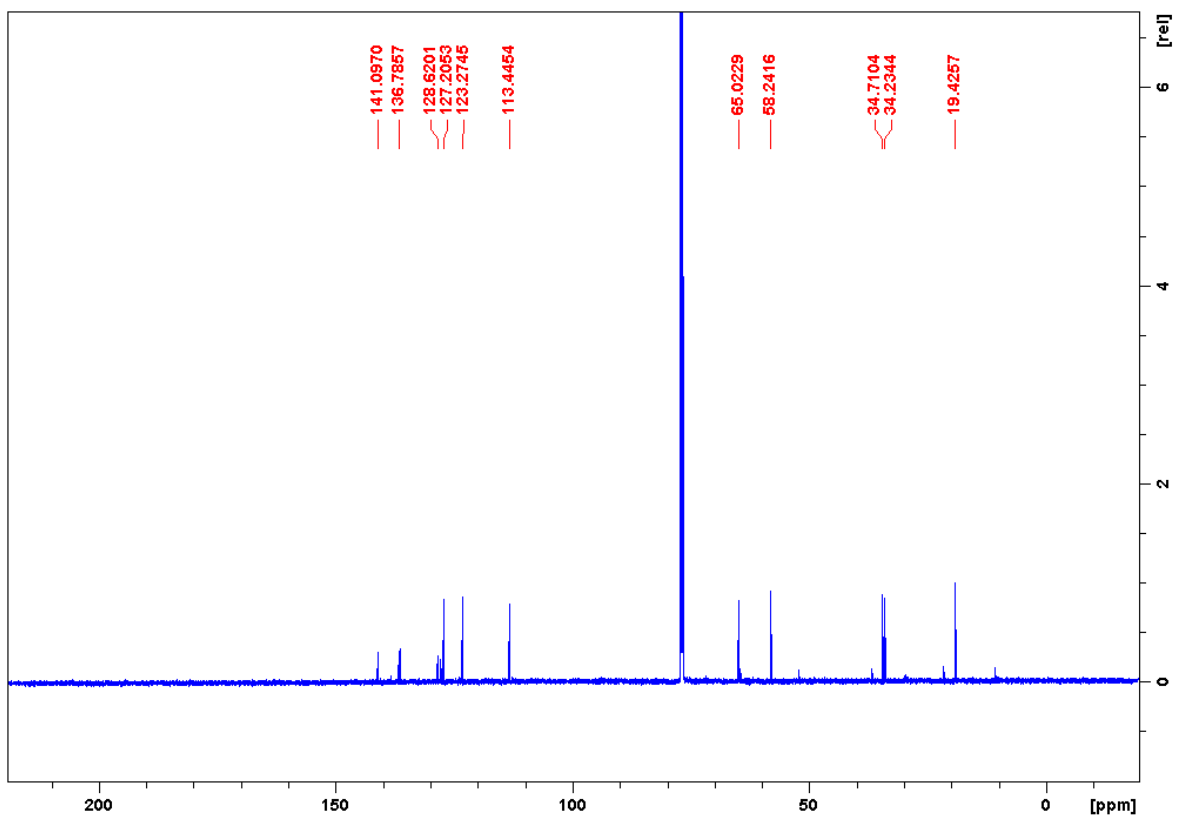

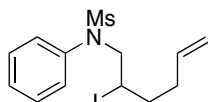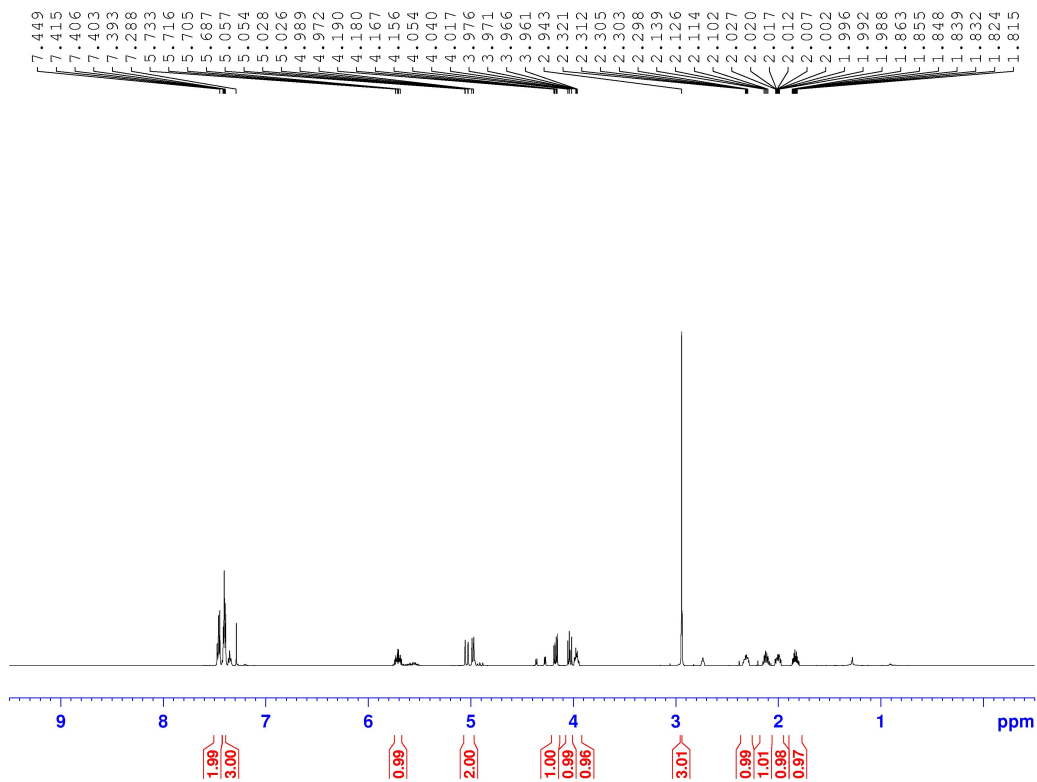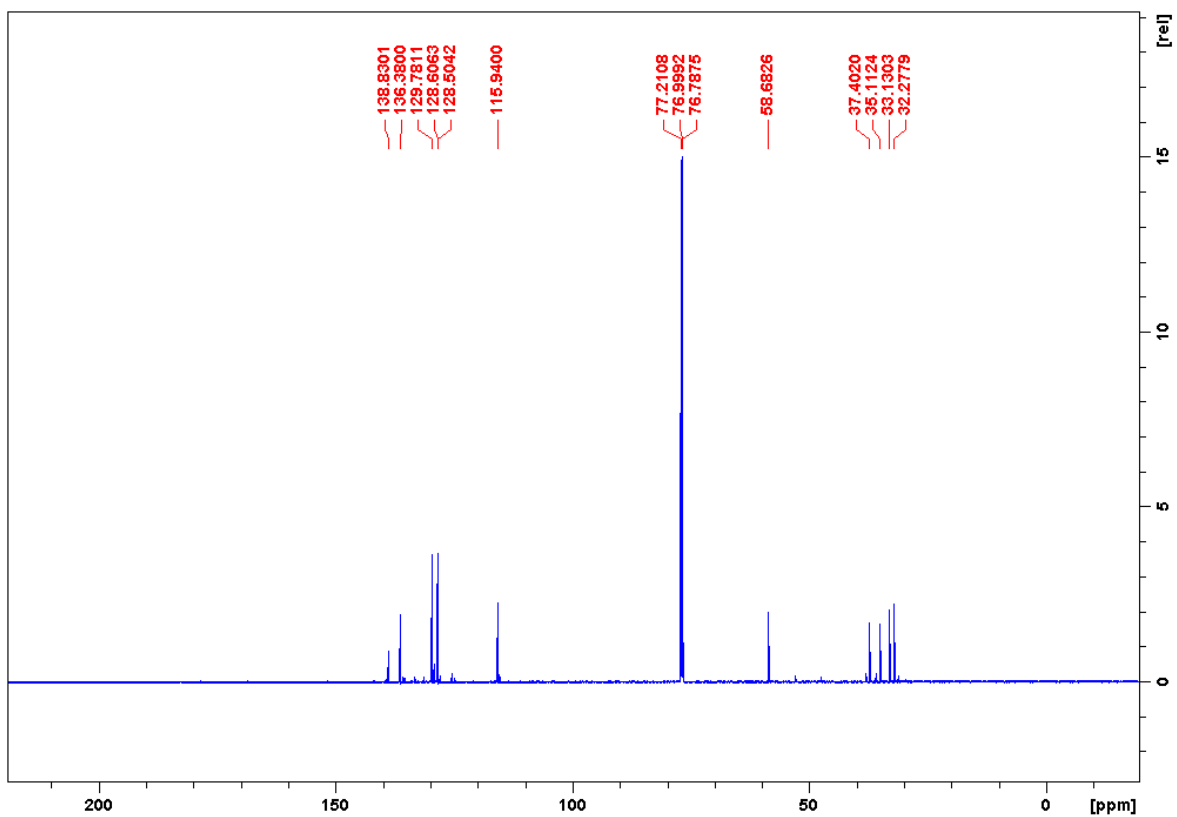



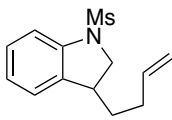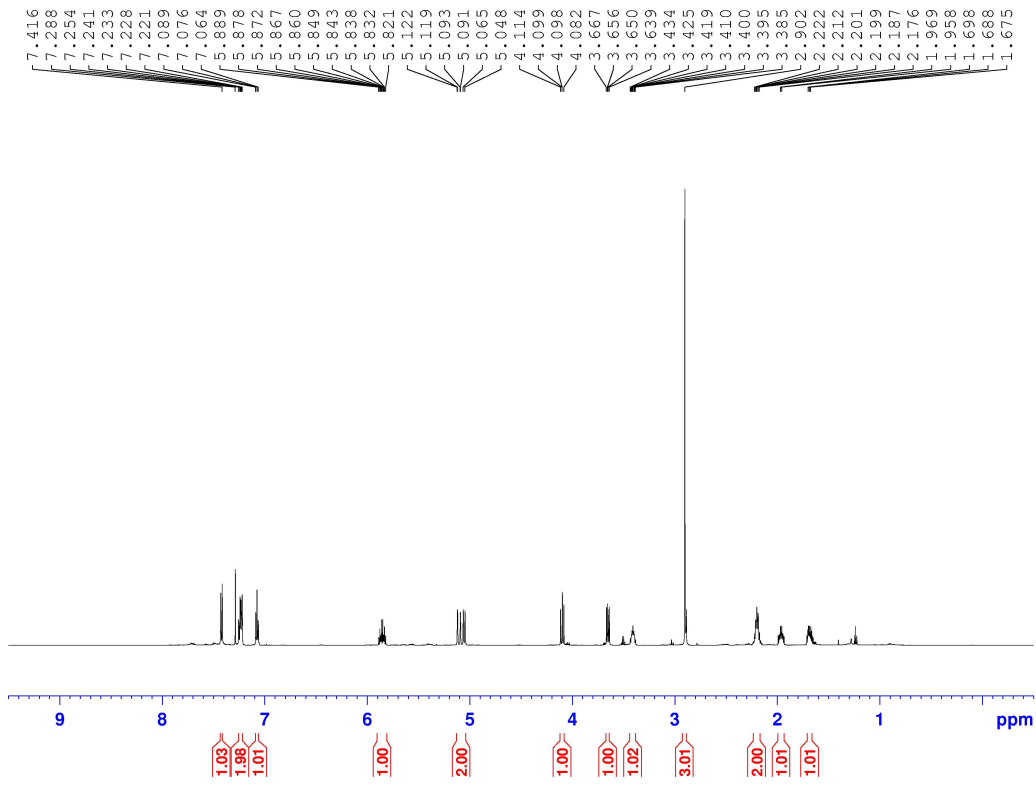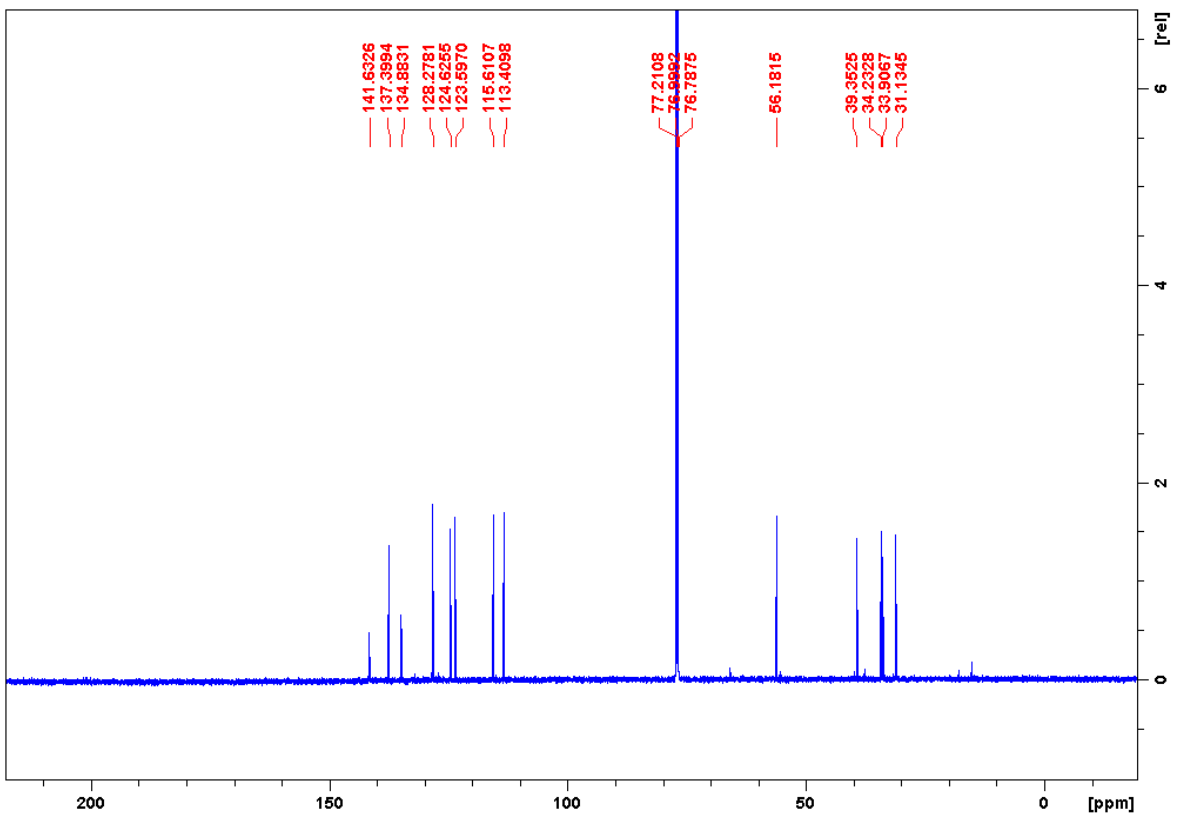

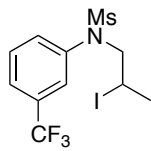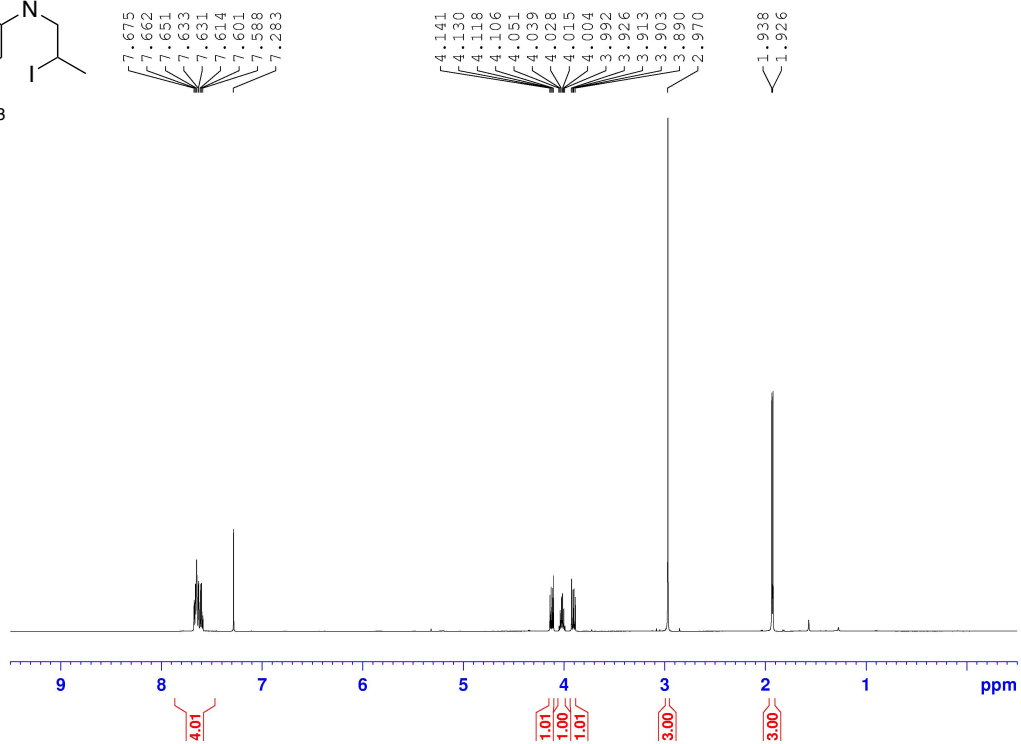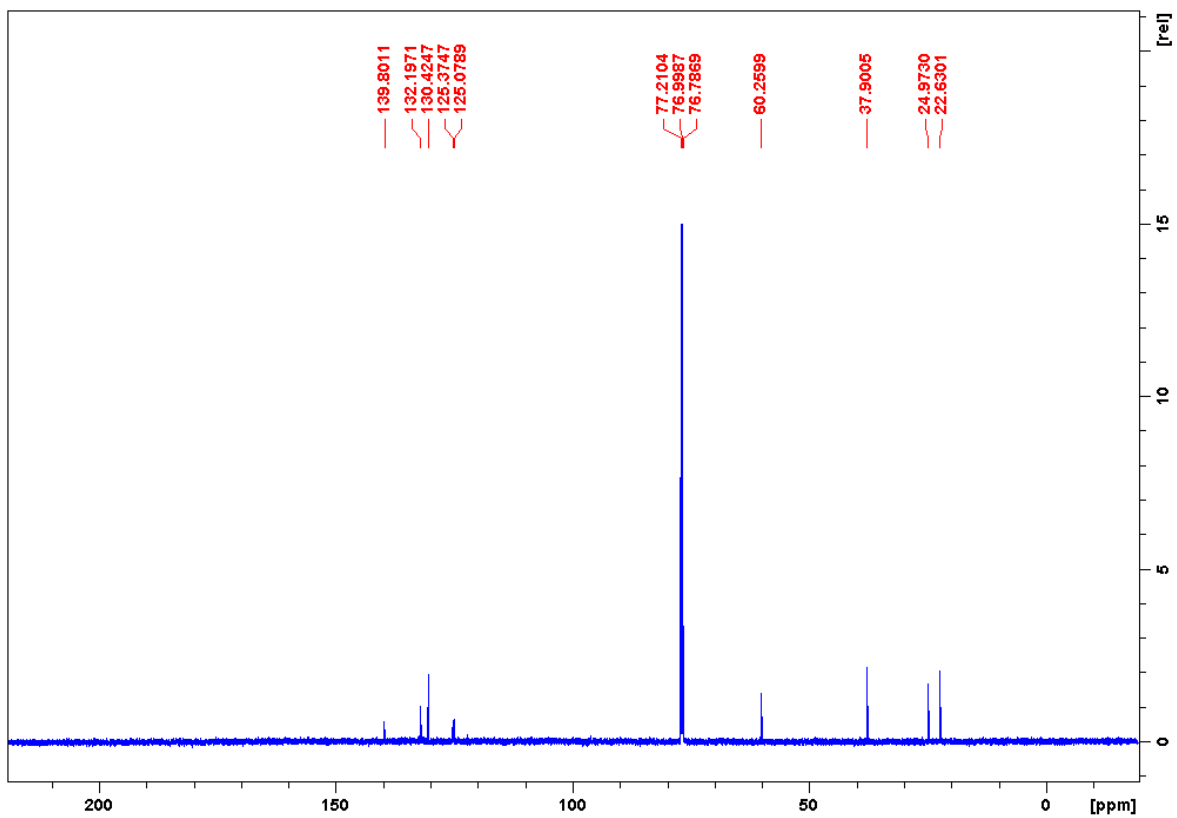

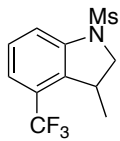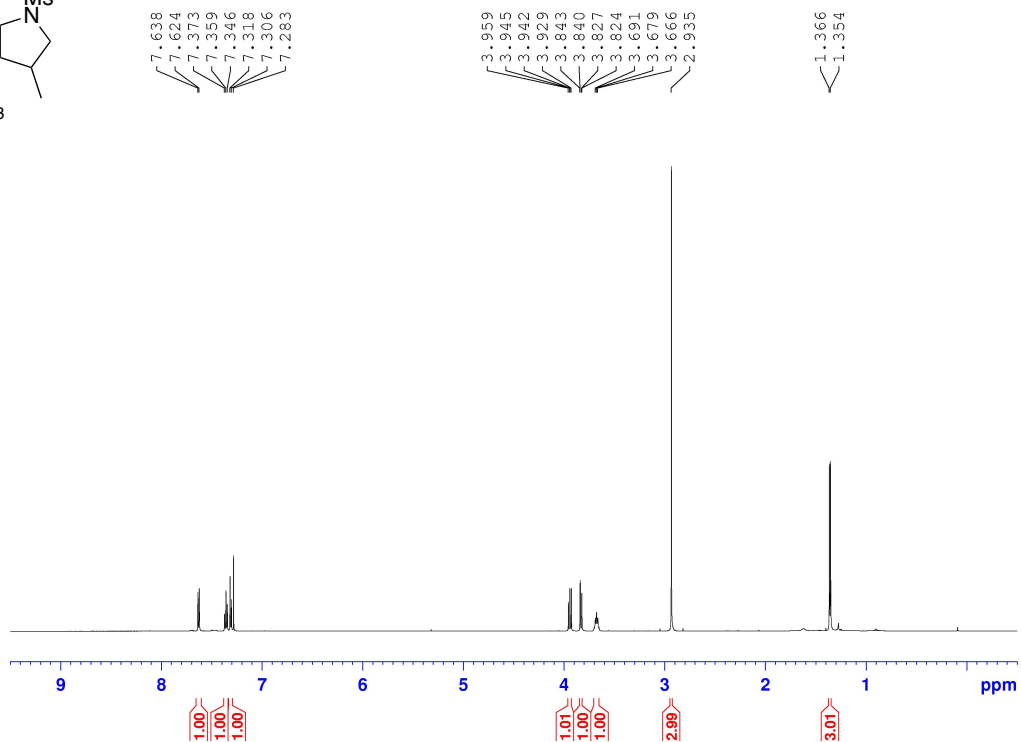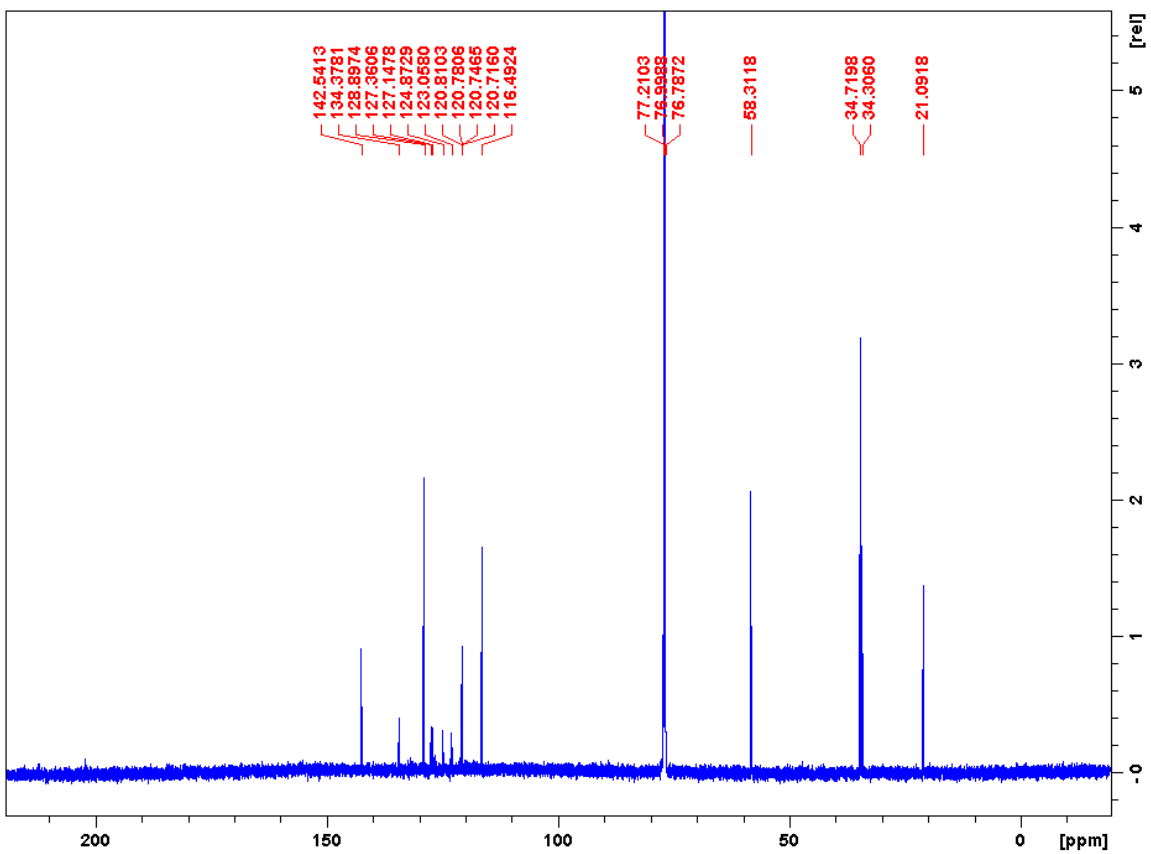

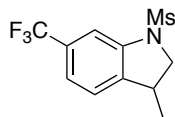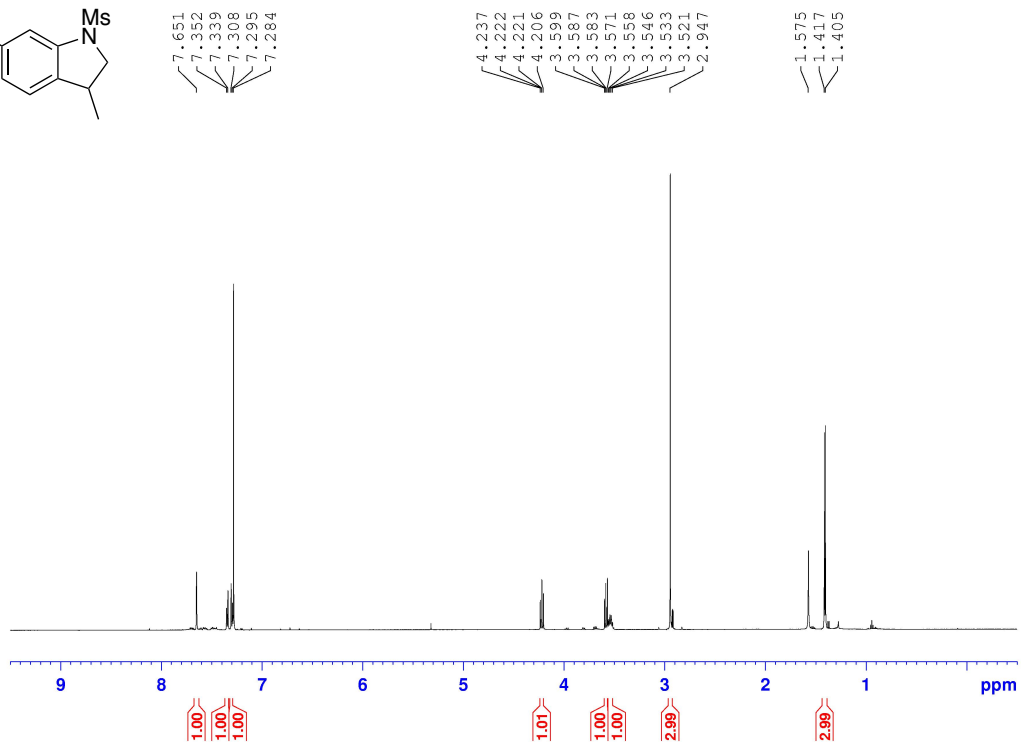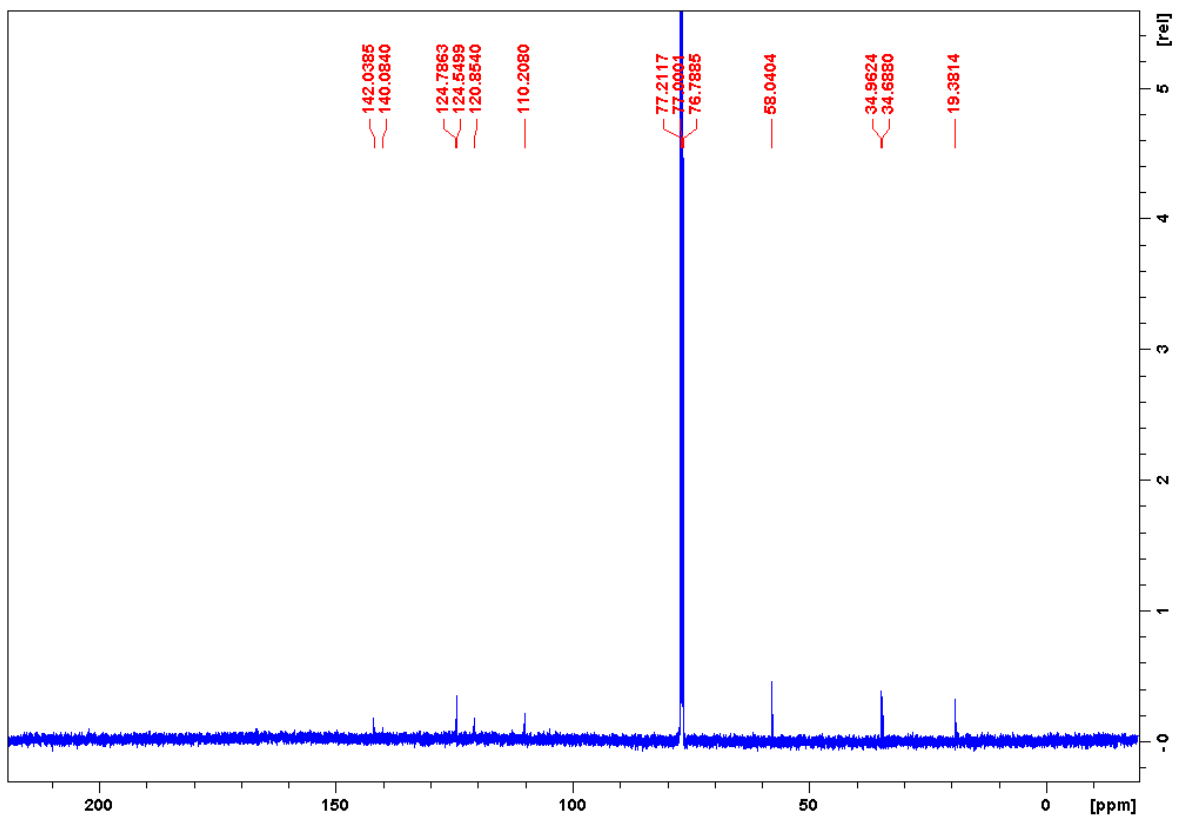

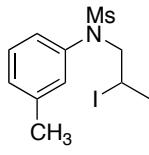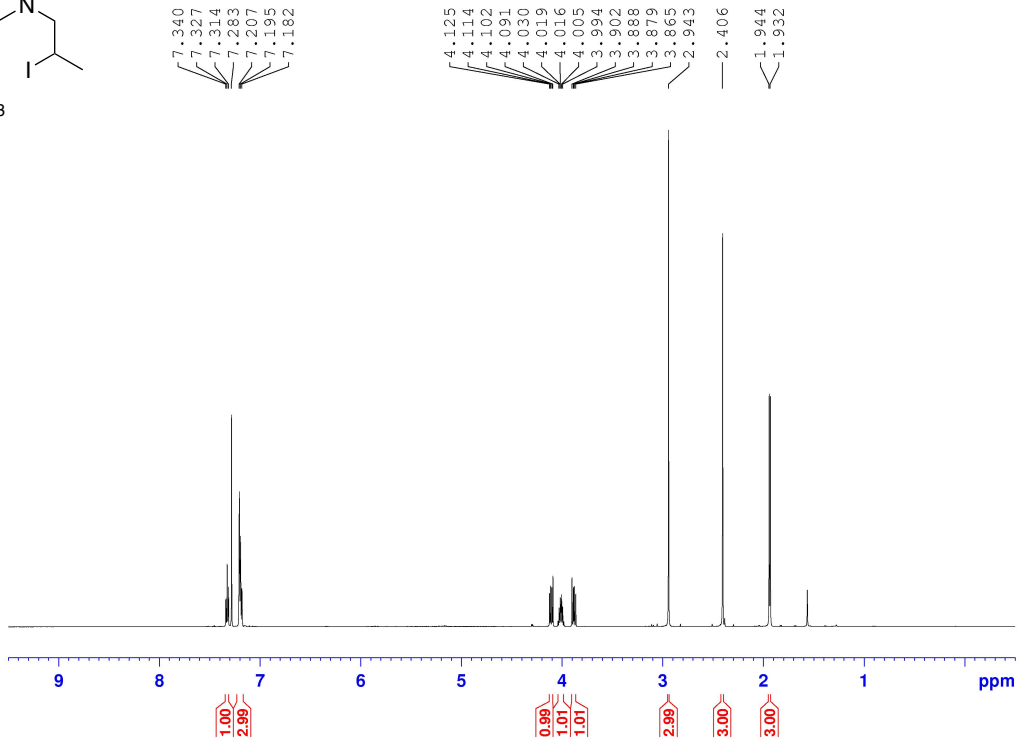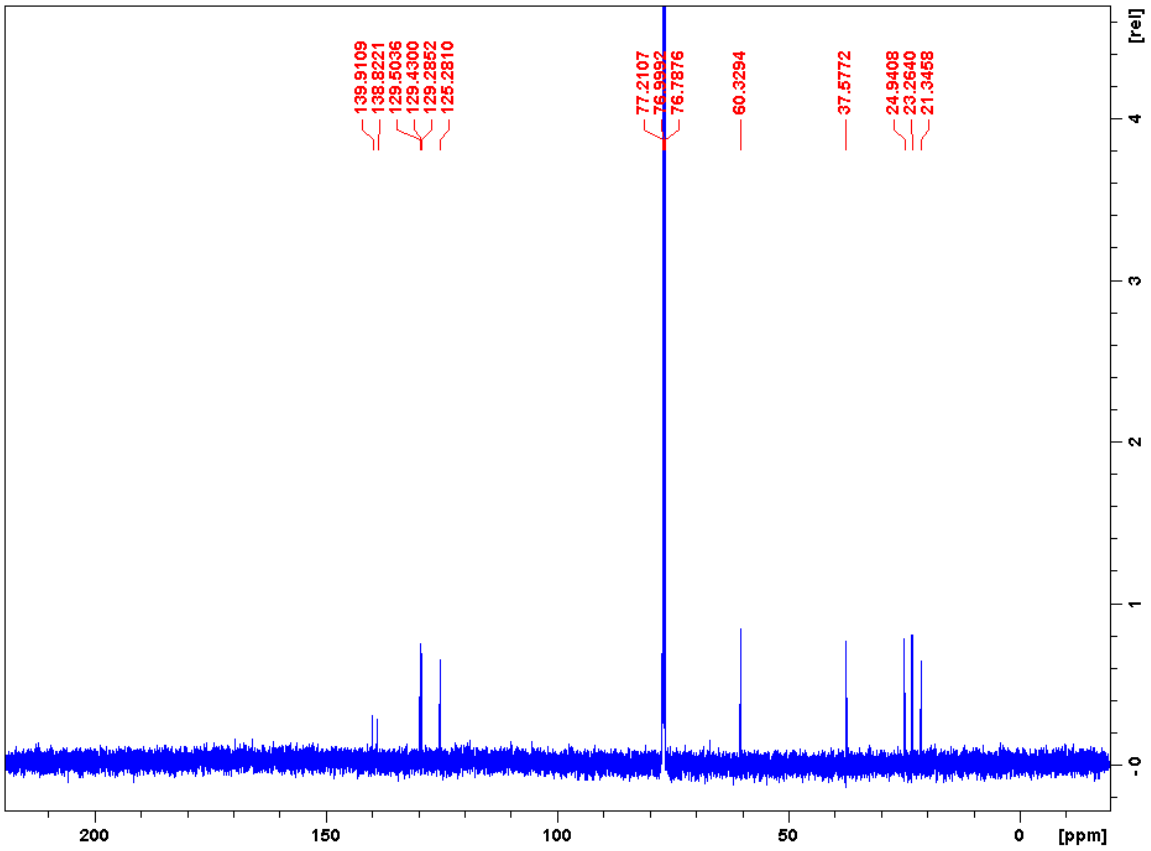

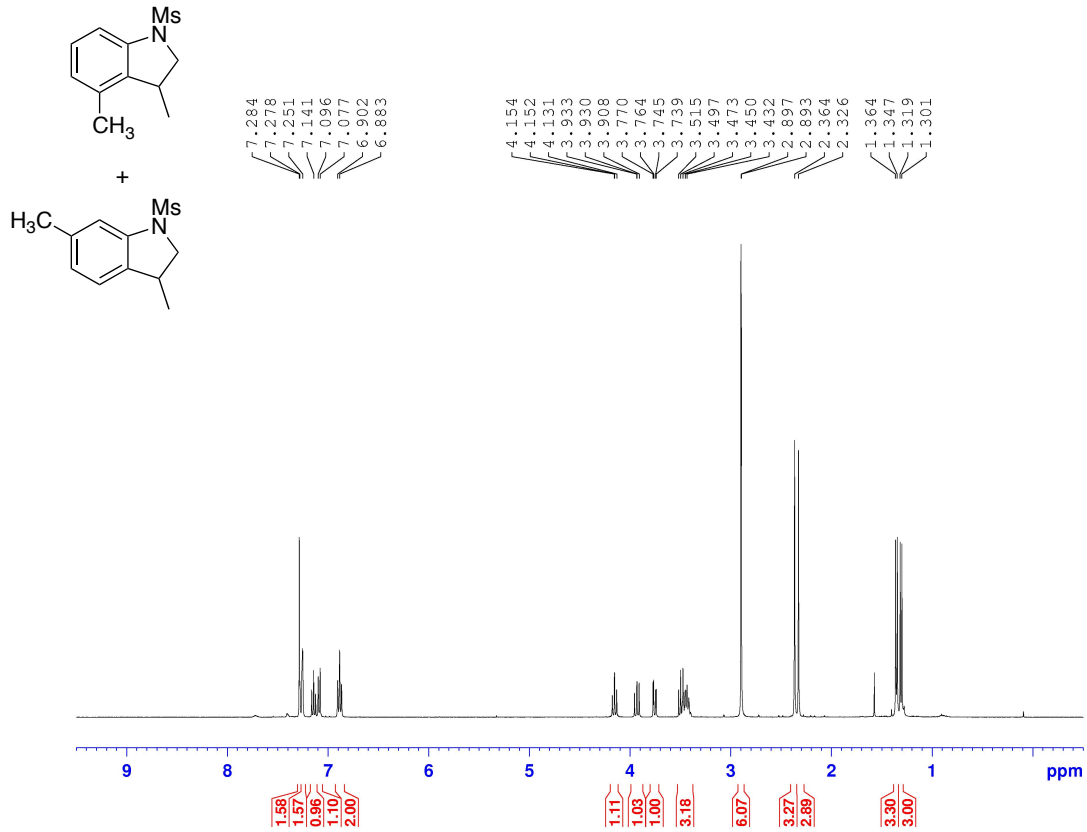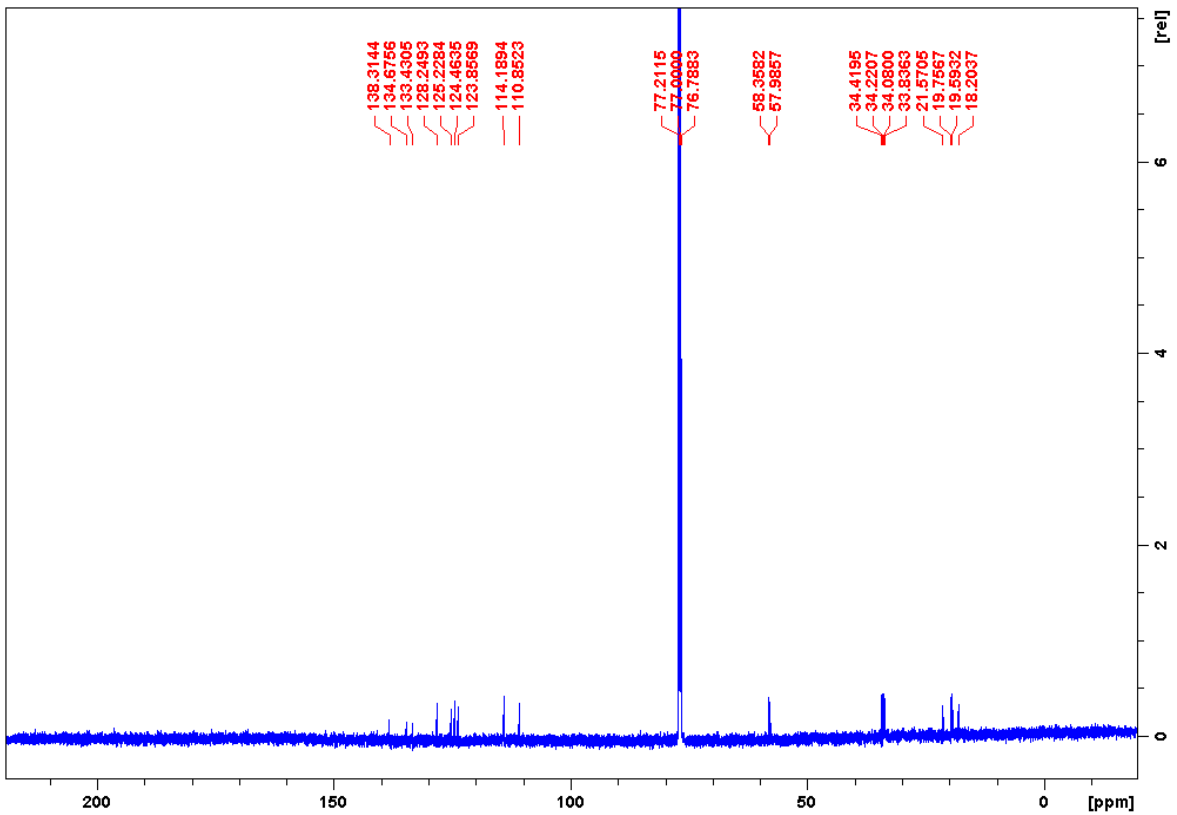

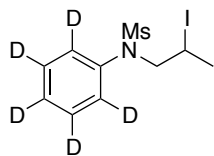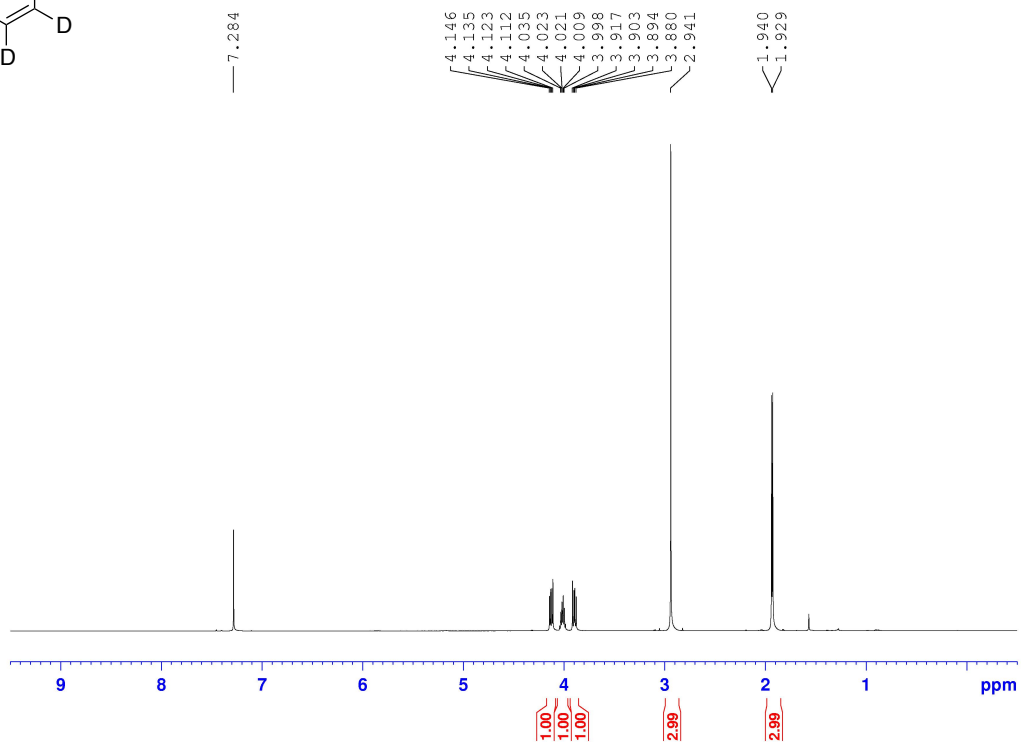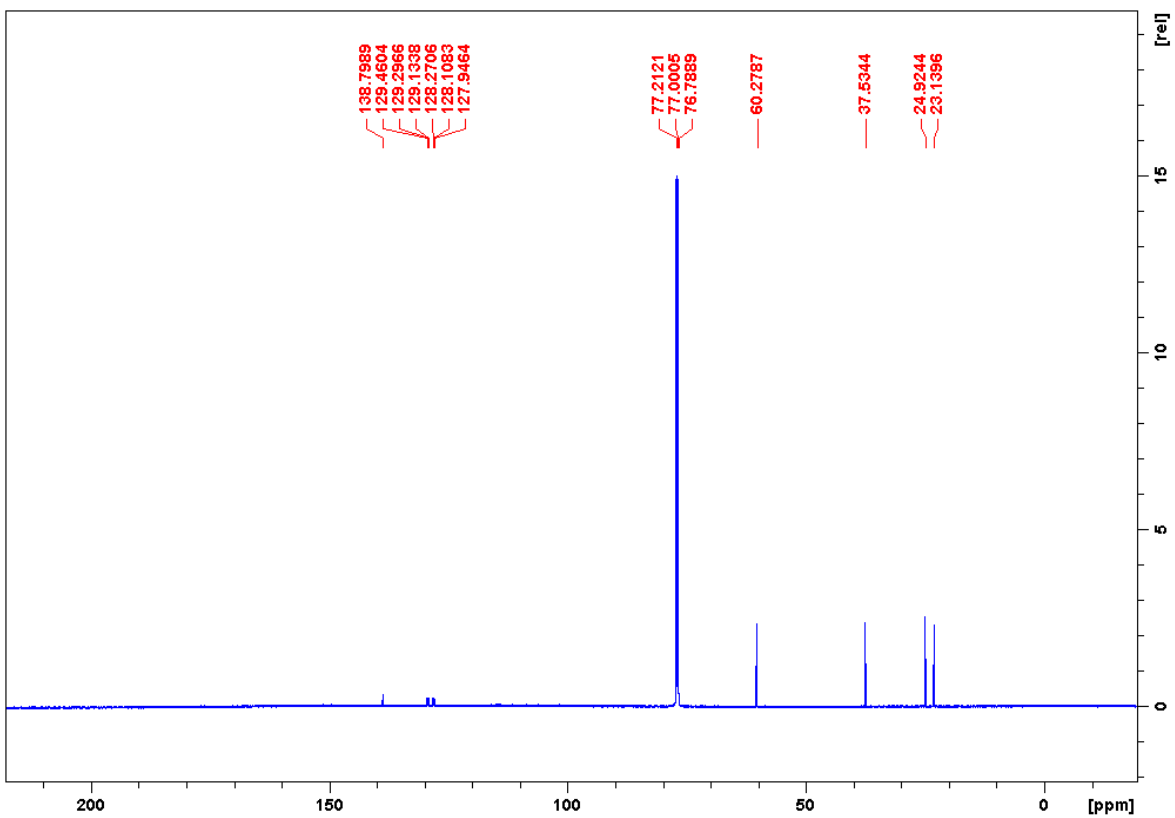

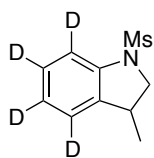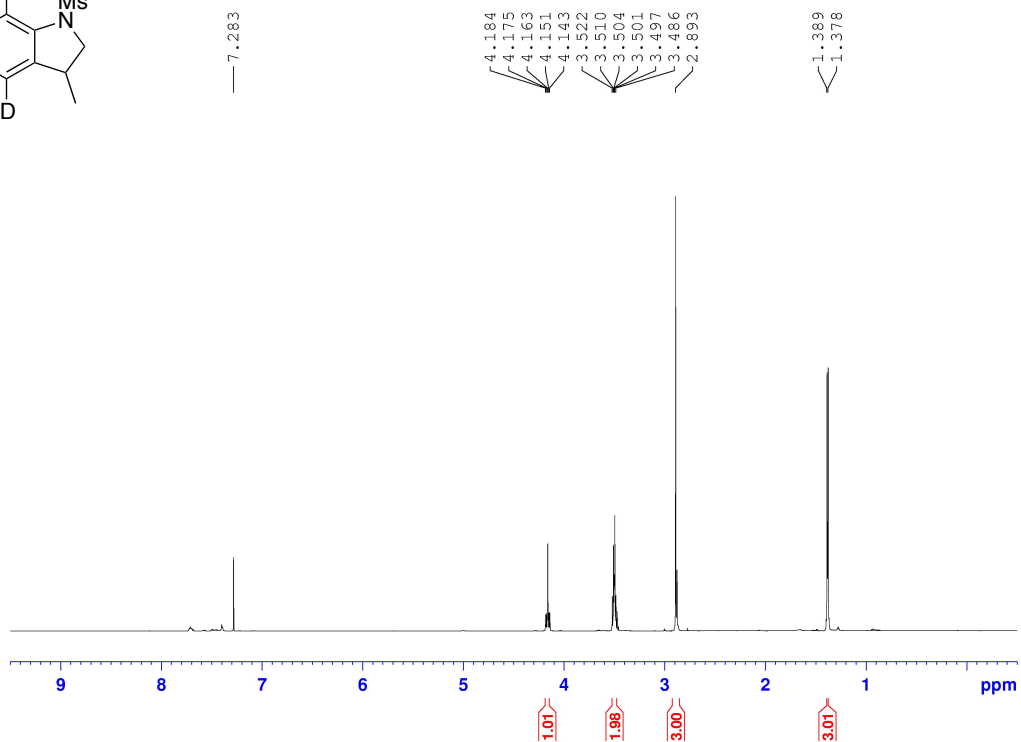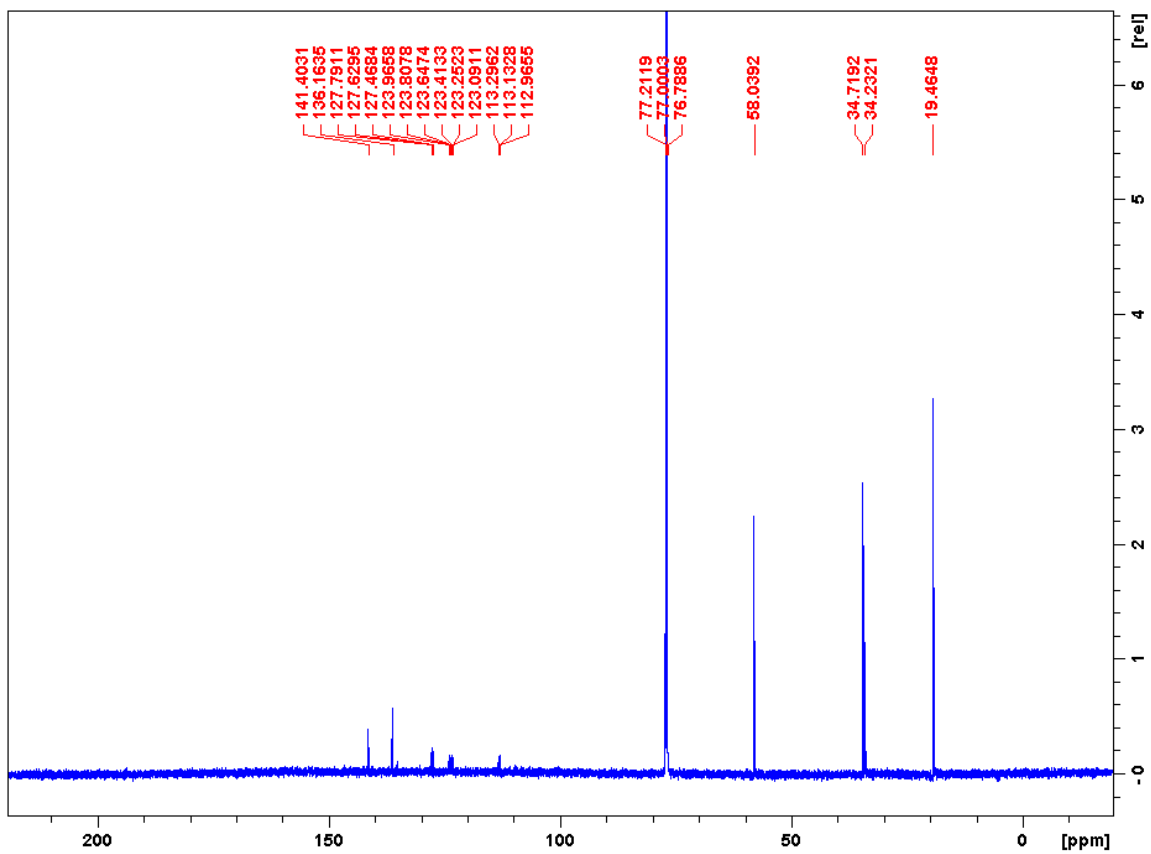



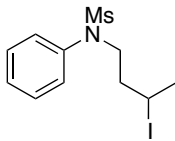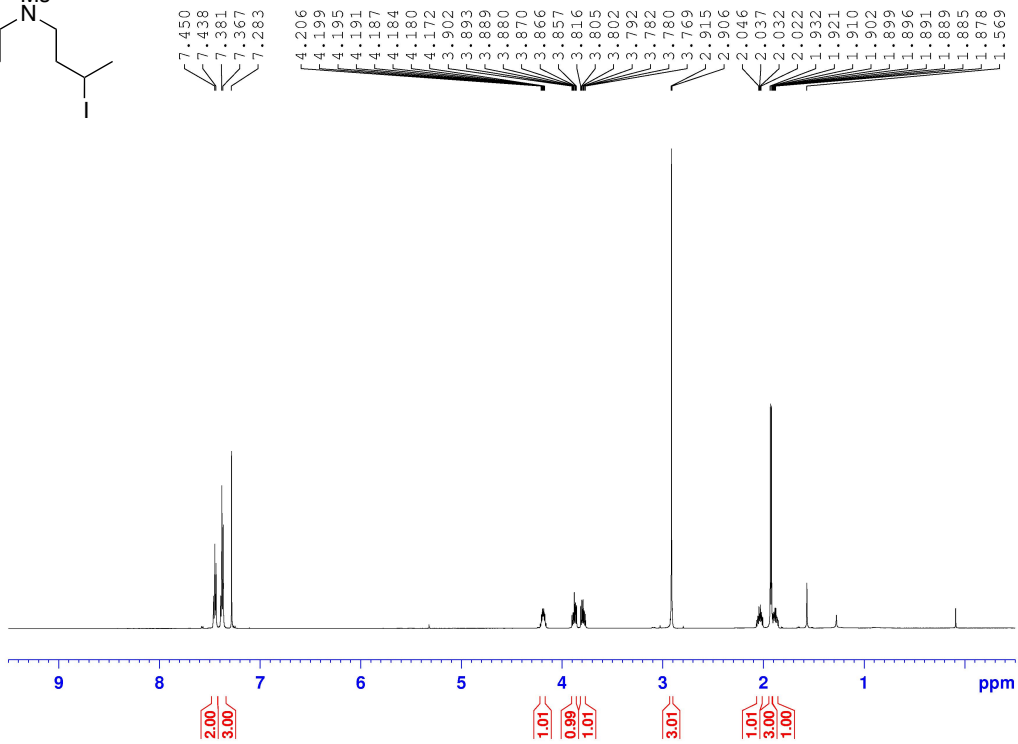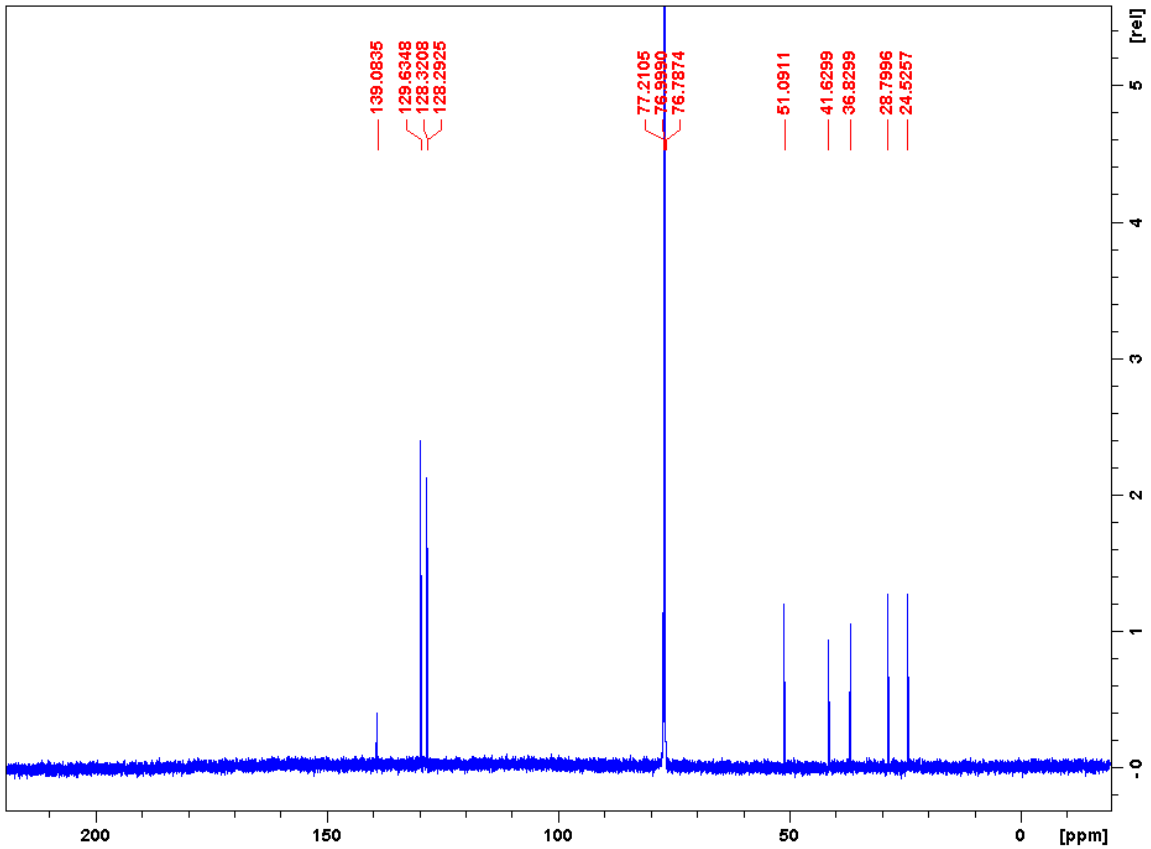

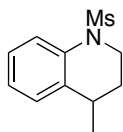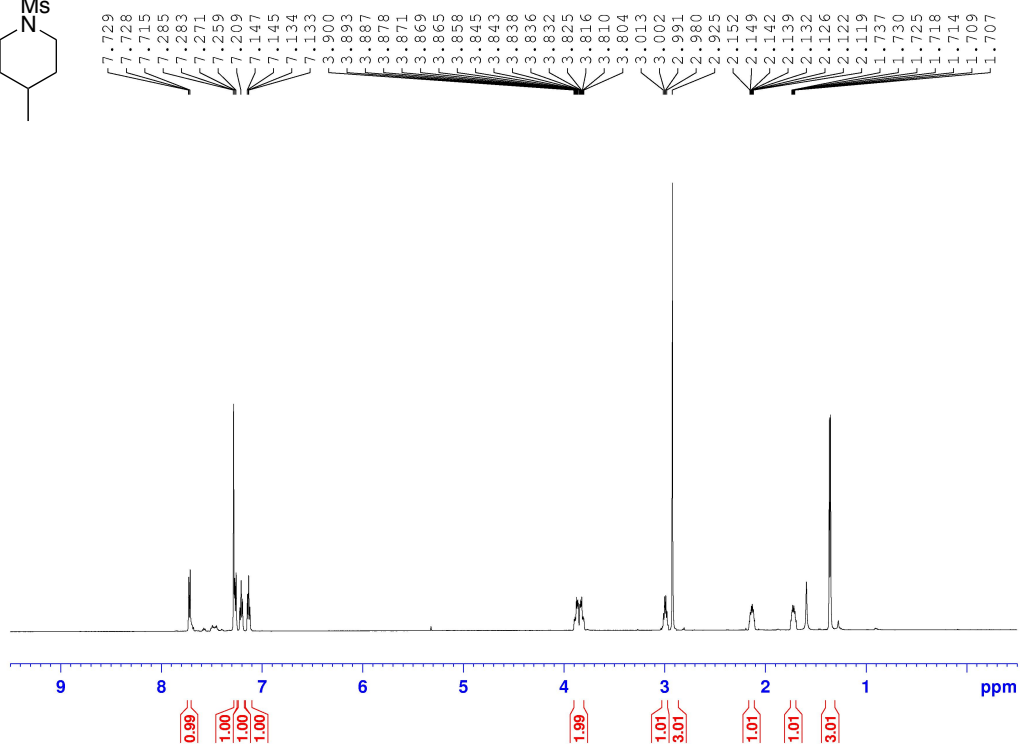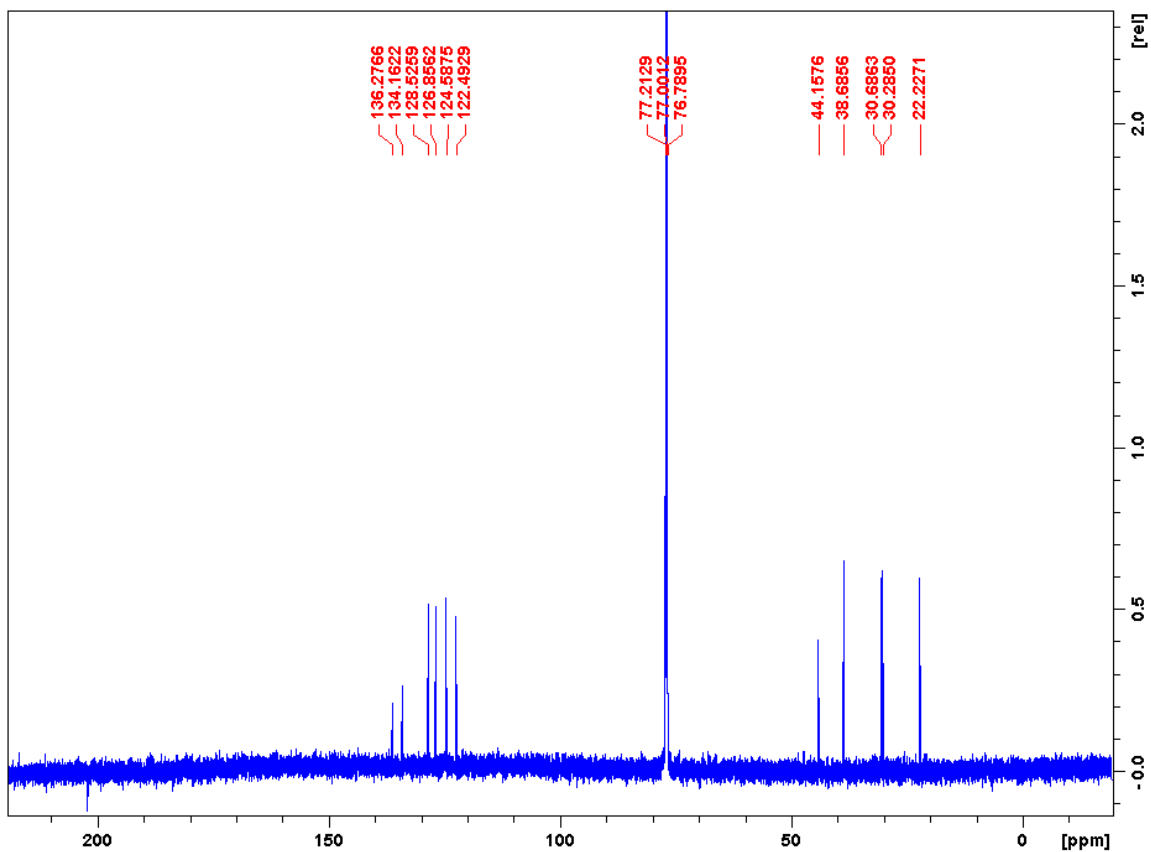

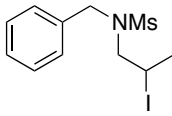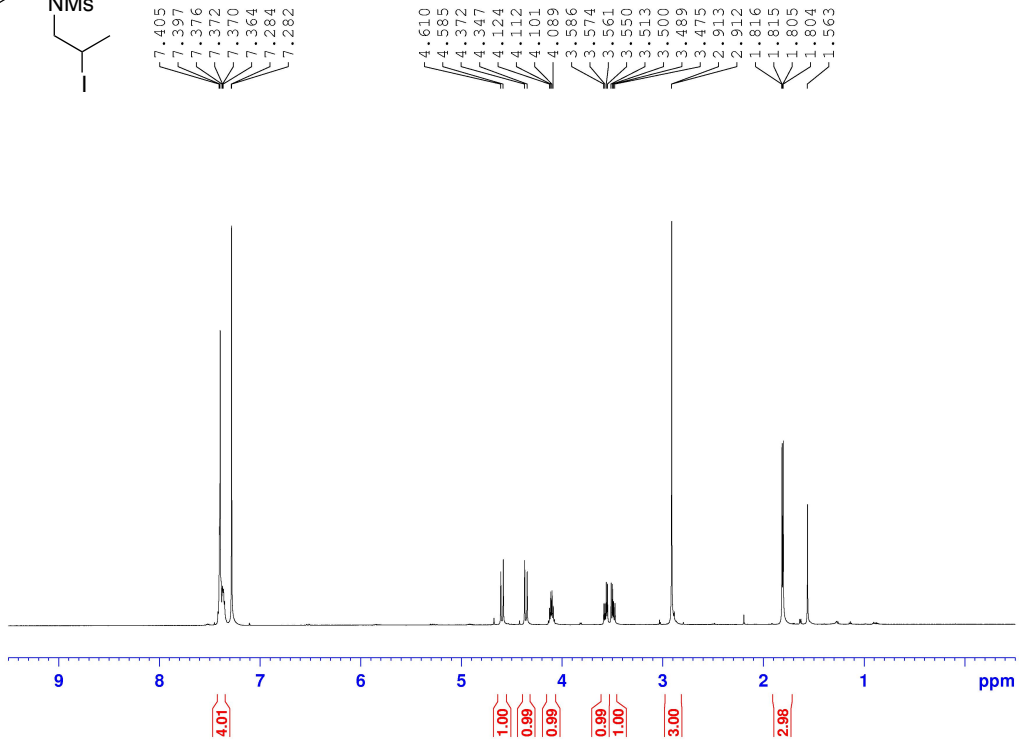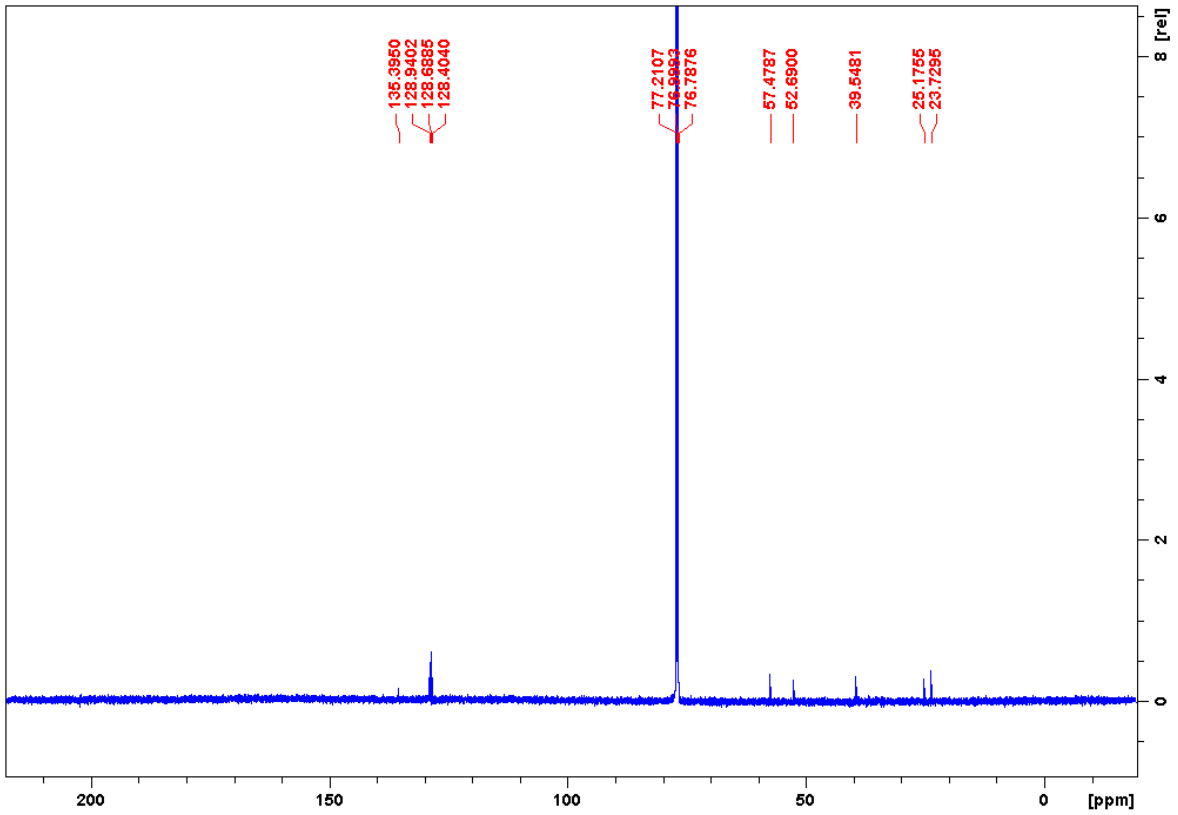

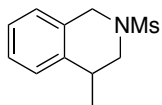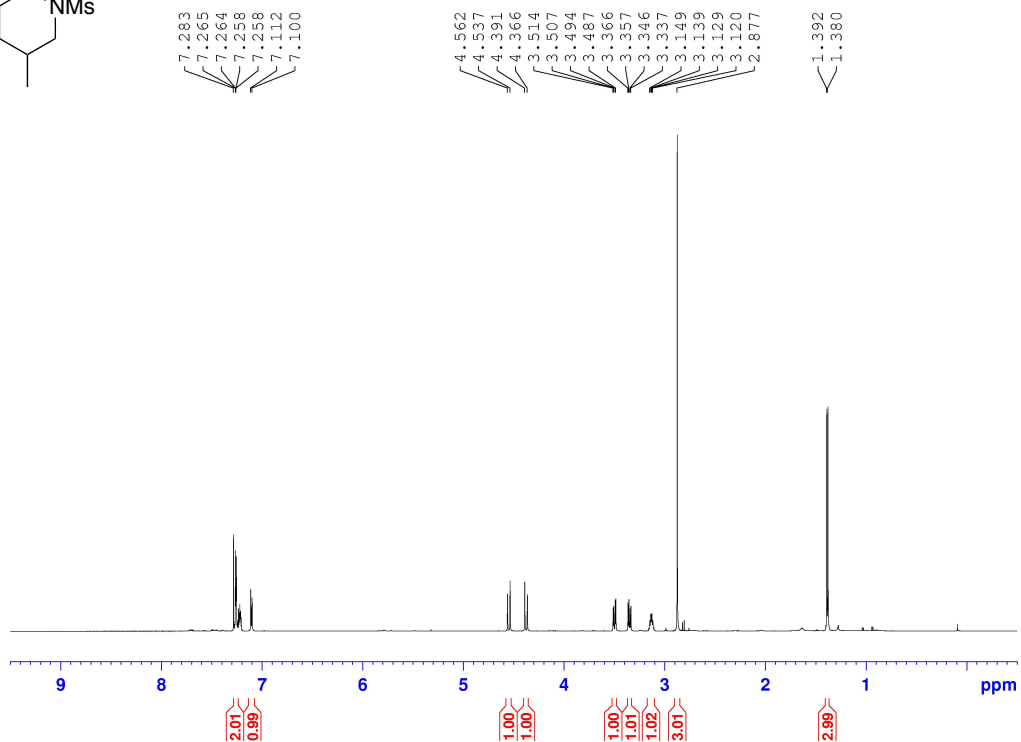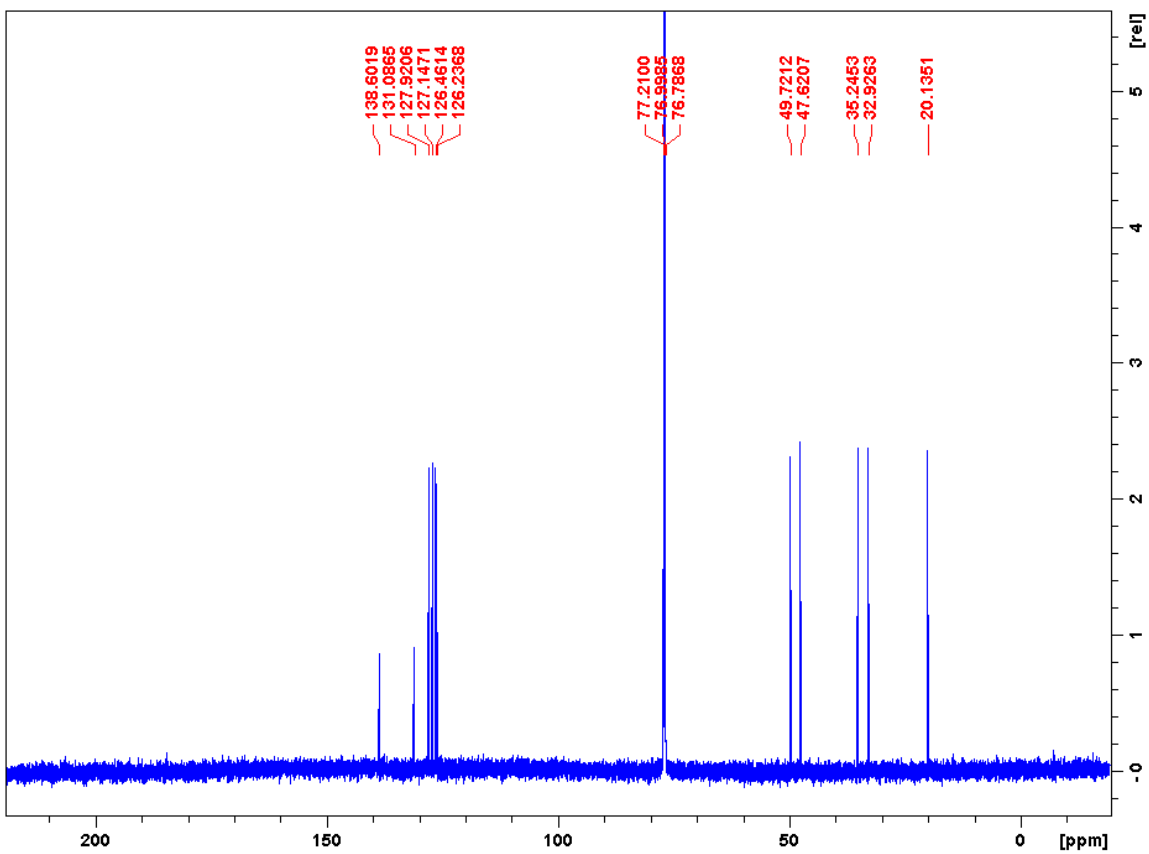

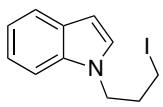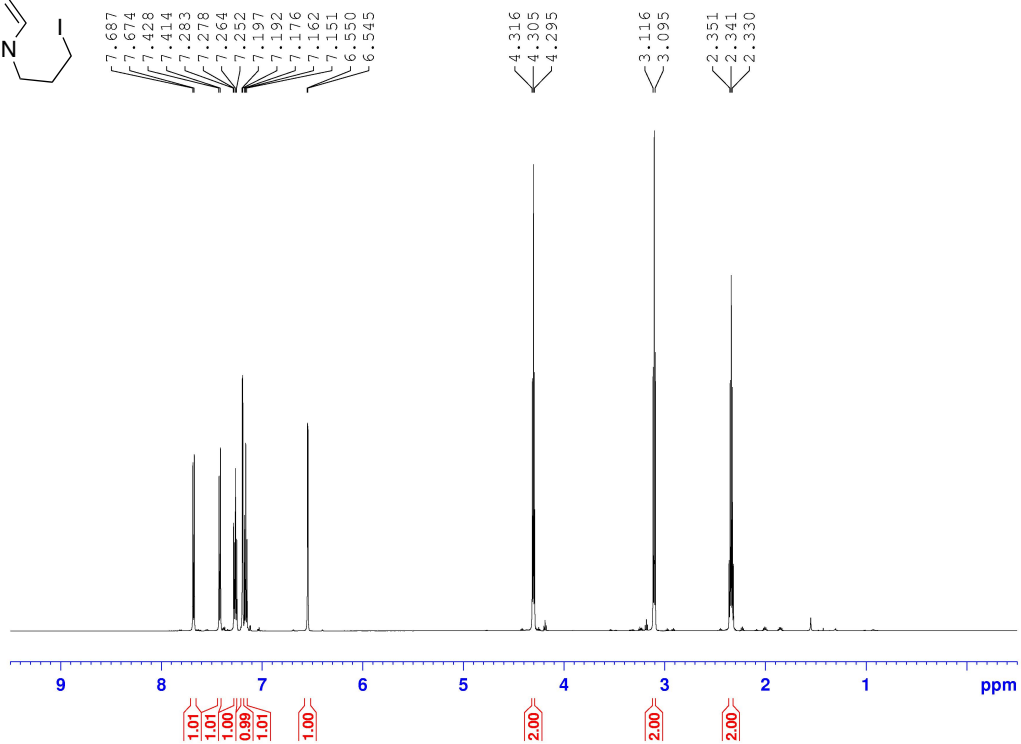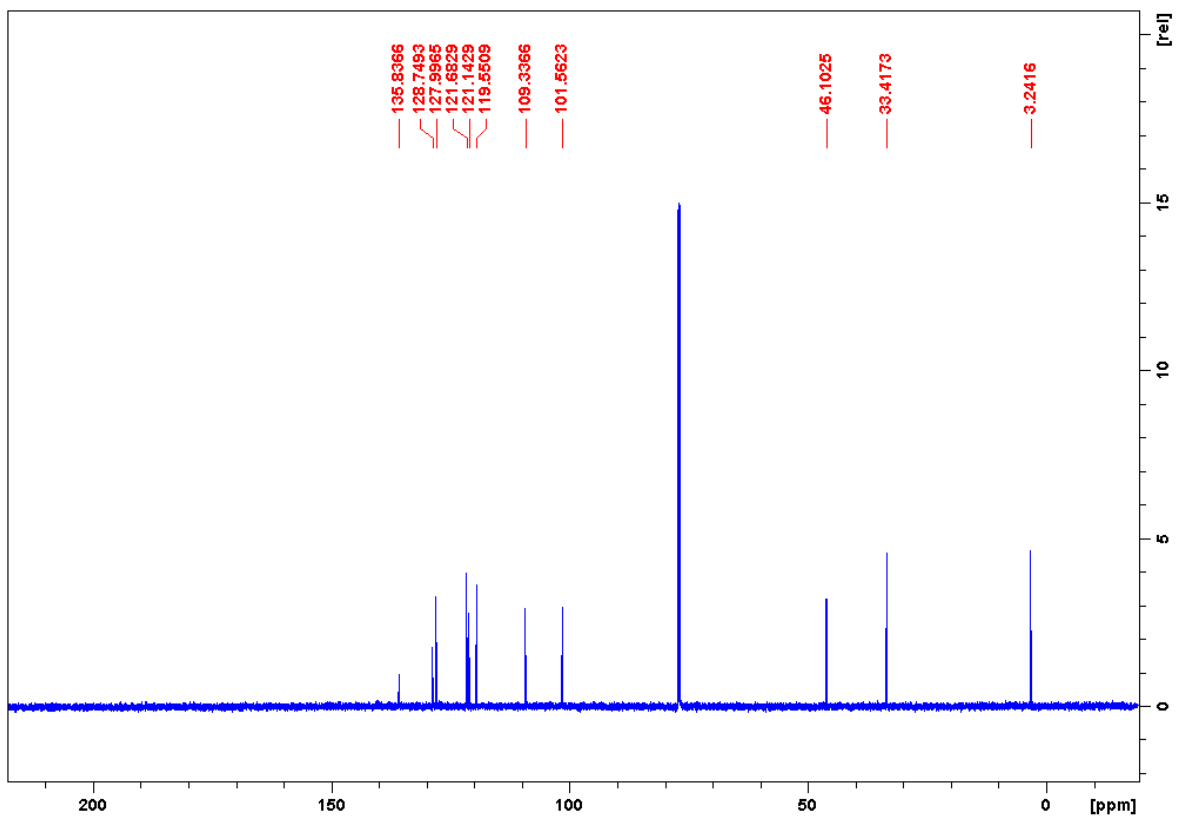

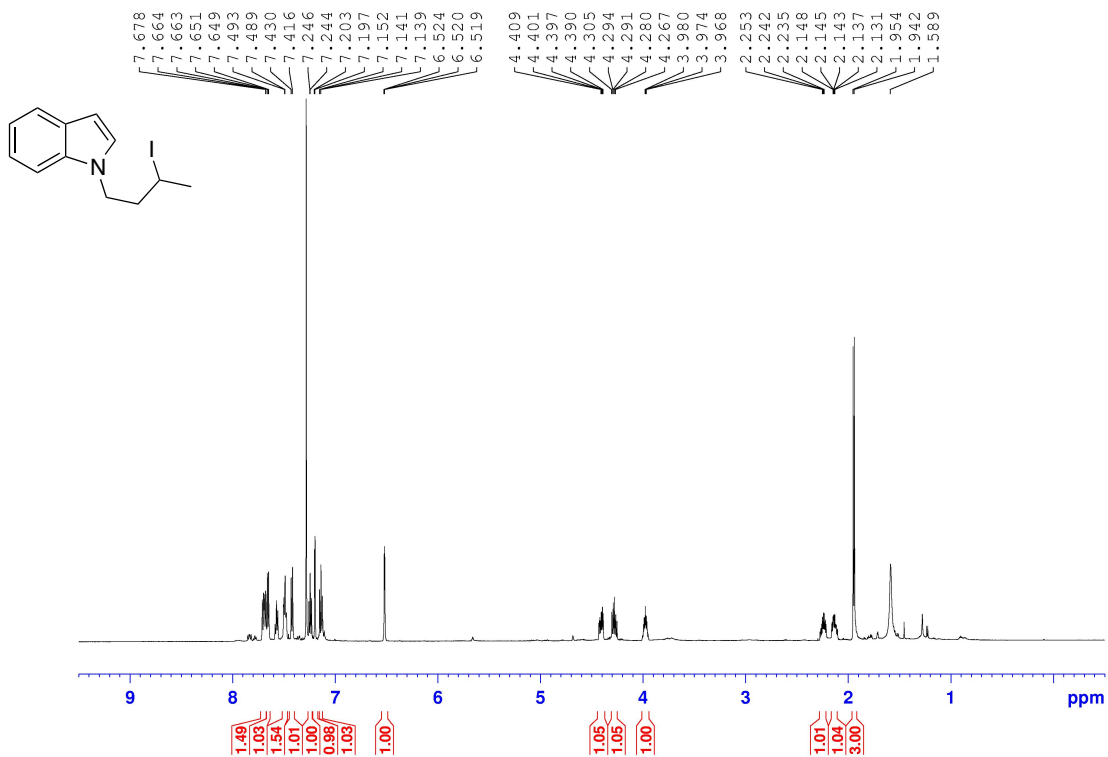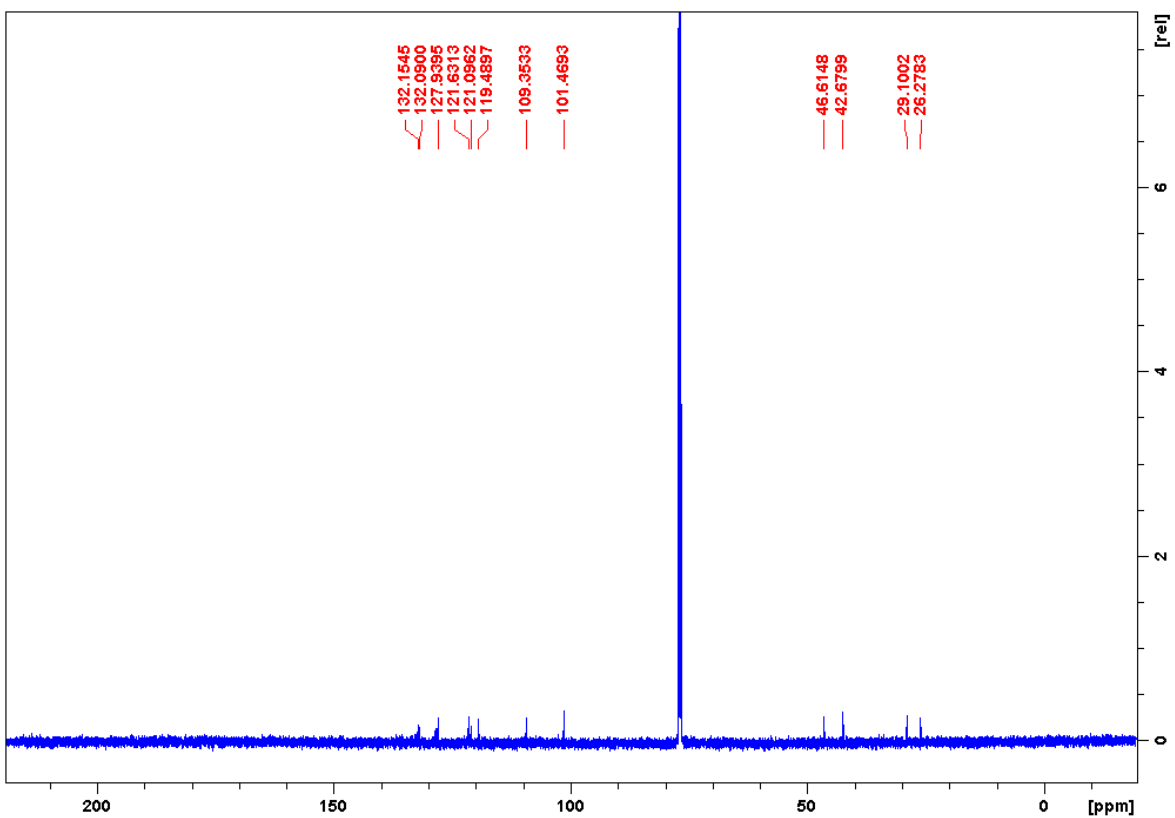

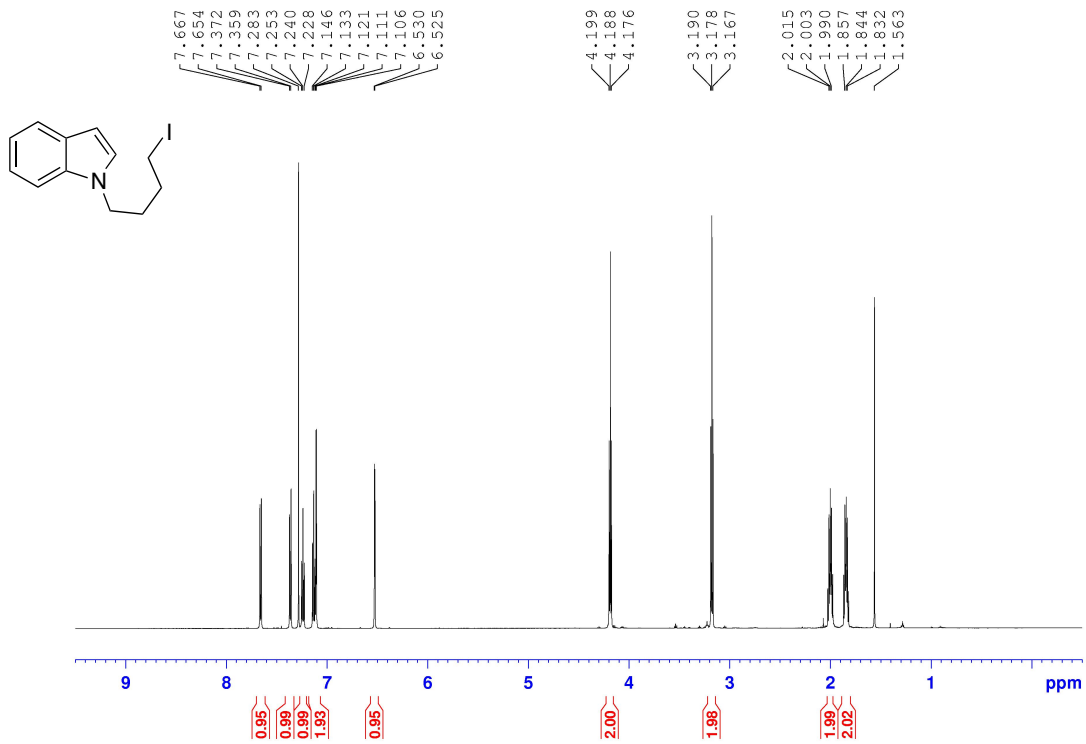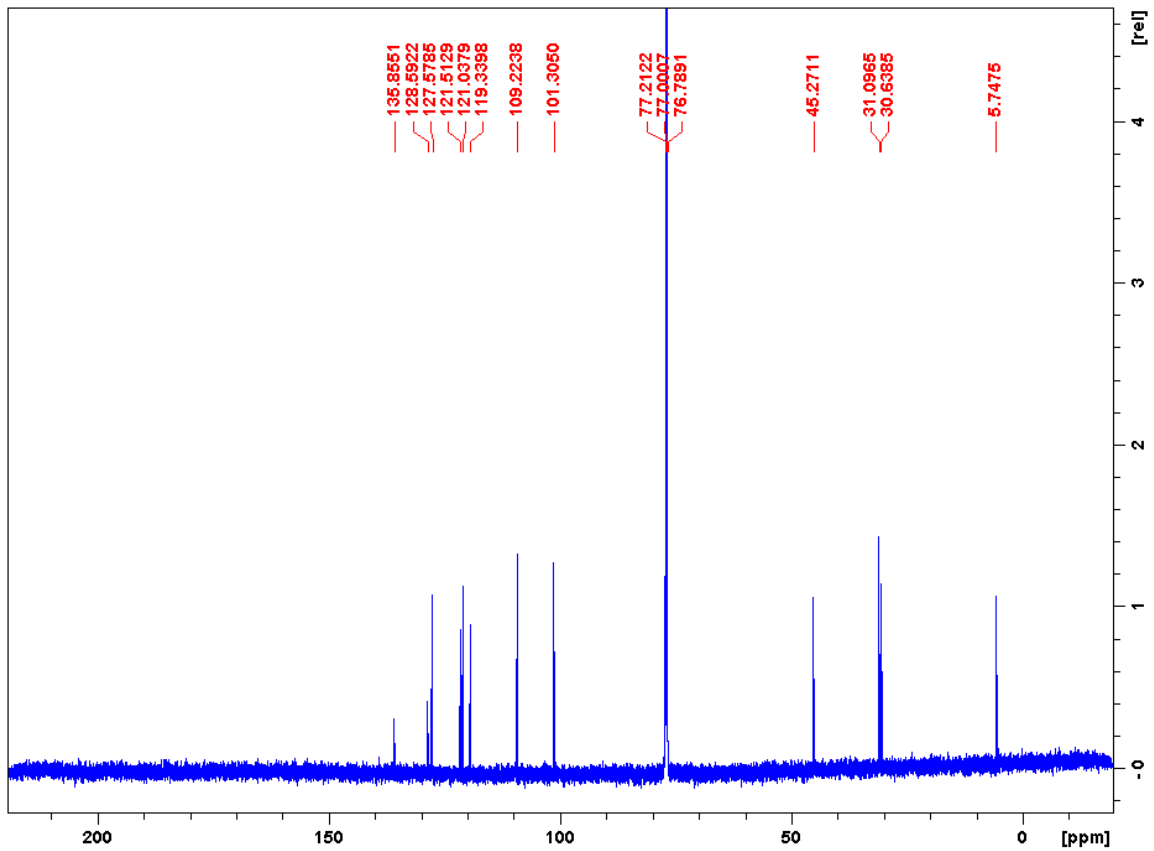

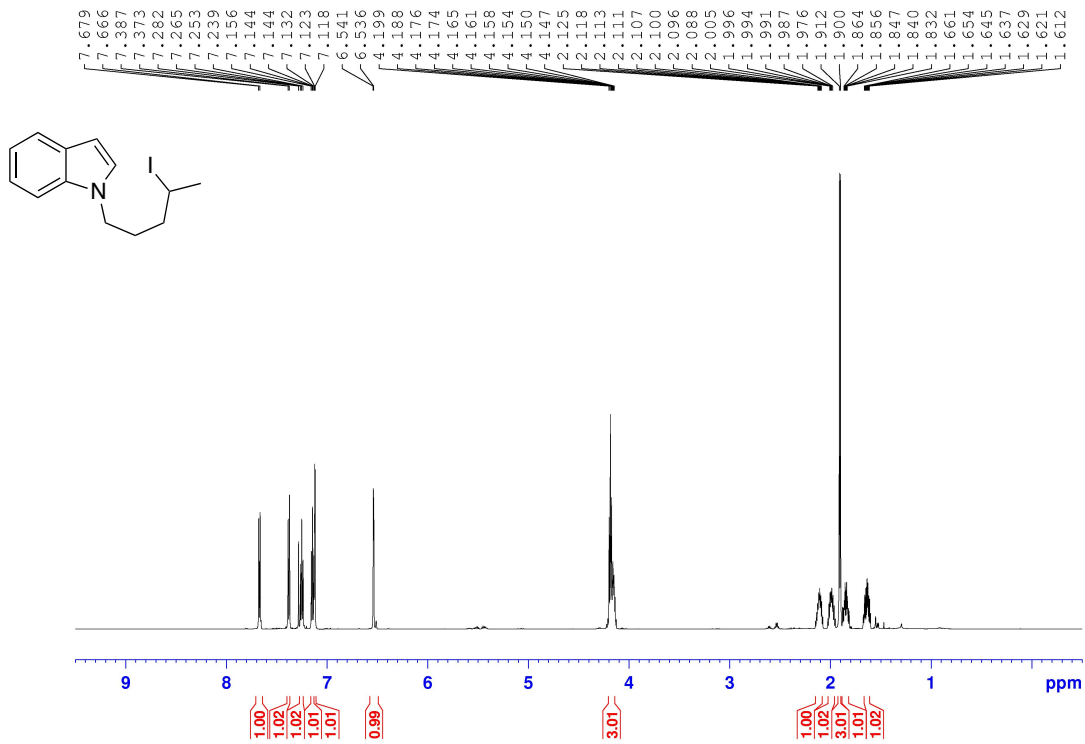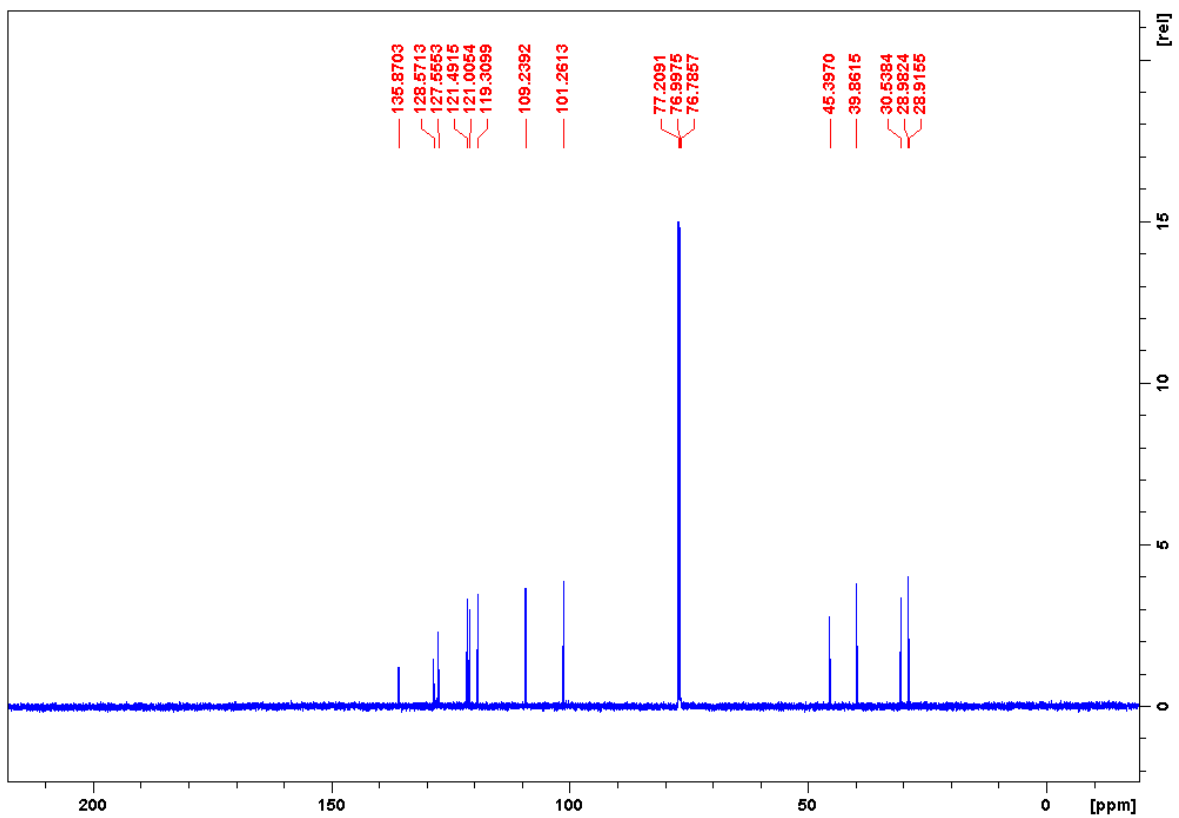



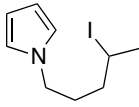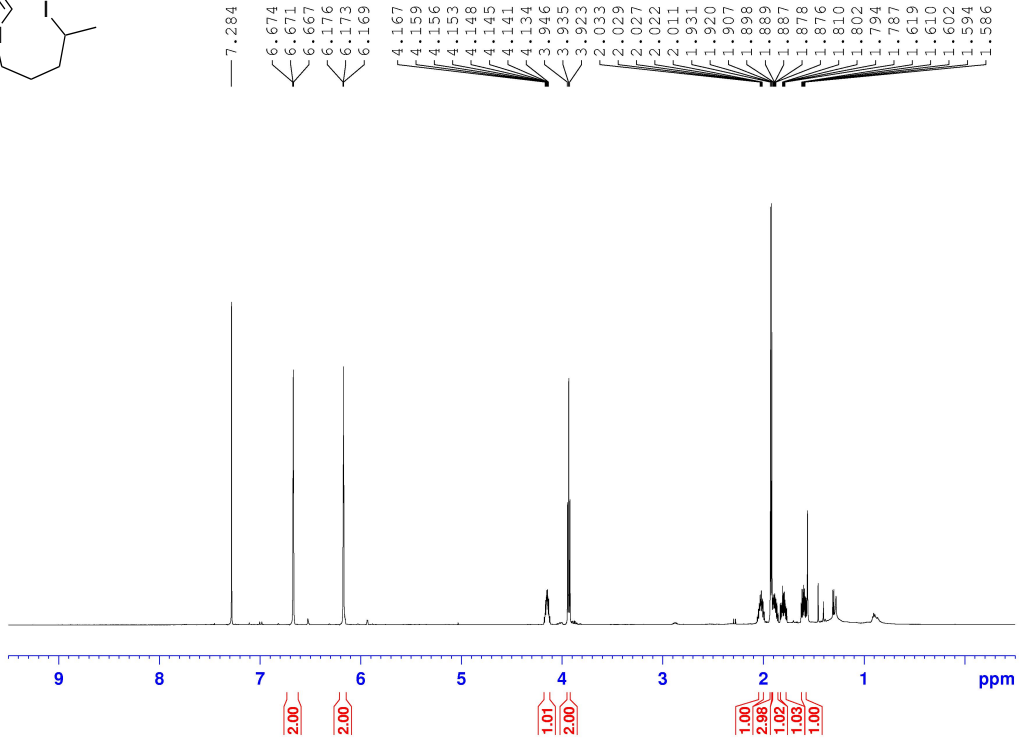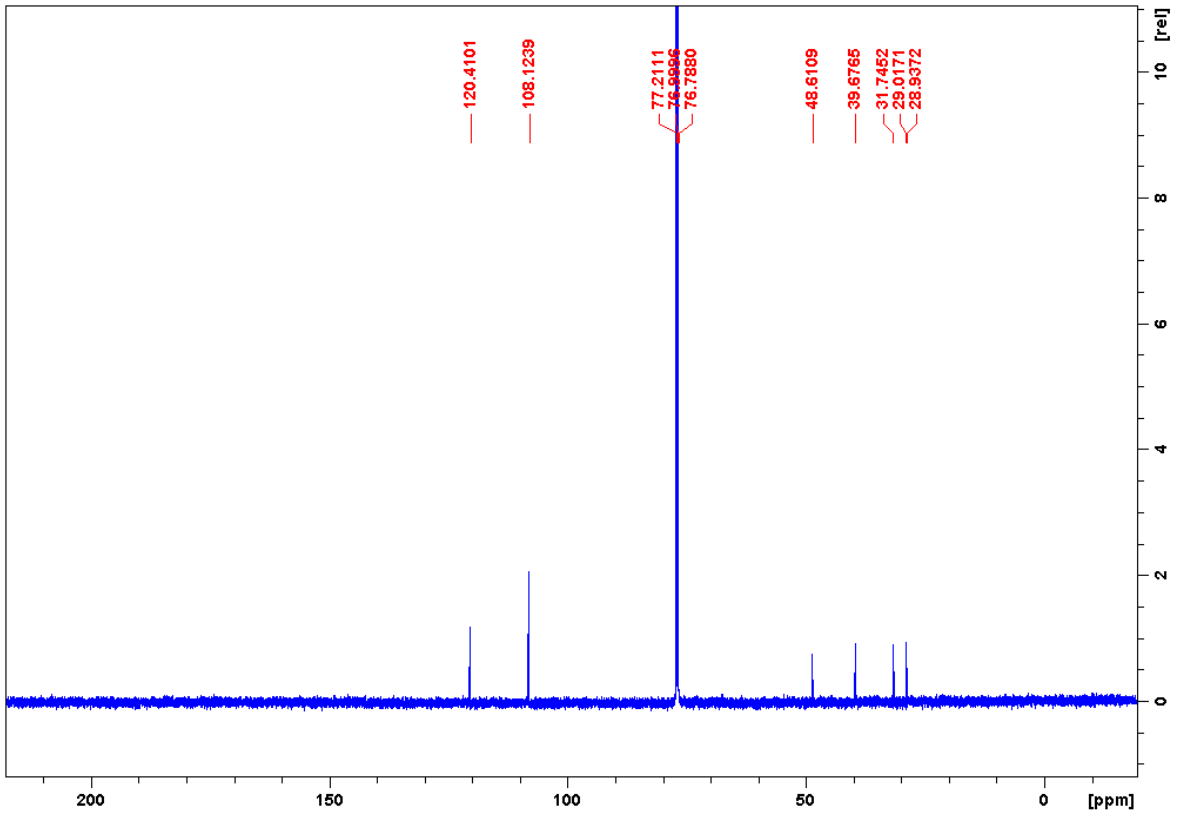

Supplement: NIHMS674715-supplement-Supporting_Information.pdf [file NIHMS674715-supplement-Supporting_Information.pdf]
